# Supplementary material for: De novo transcriptome assembly and functional analysis reveal a dihydrochalcone 3-hydroxylase(DHC3H) of wild Malus species that produces sieboldin in vivo
Source: Front Plant Sci. 2022 Dec 16;13:1072765. doi: 10.3389/fpls.2022.1072765 (PMC9800874; doi:10.3389/fpls.2022.1072765)
Supplement: Supplementary file 8 [file Table_1.xlsx]

## Sheet: Sheet1
Supplementary Table 1. Wild and hybrid Malus accessions from Fondazione Edmund Mach's collection used in this study
Sample Nr	Accession ID	Origin
25	M. toringo syn. sieboldii (PI 590051)	UNIV-GEN.
26	M. toringo syn. sieboldii MA4 (PI 589958)	UNIV-GEN.
31	M. micromalus (PI 594092)	UNIV-GEN.
37	M. sargentii (PI 590049)	UNIV-GEN.
40	M. prunifolia (PI 594102)	UNIV-GEN.
42	M. toringo B9 2 33 (PI 594094)	UNIV-GEN.
82	M. baccata (B1 Floribunda AB7)	ISF-BO
89	M. prunifolia (B1 A79)	ISF-BO
108	M. adstringens	ISF-BO
117	M. sargentii Rosea (PI 588919)	UNIV-GEN.
120	M. sargentii GMAL 53 B9-2-32 (PI 588761)	UNIV-GEN.
121	M. mandshurica (PI 588753)	UNIV-GEN.
122	M. mandshurica Gloriosa (PI 588754)	UNIV-GEN.
124	M. hartwigii (PI 589420)	UNIV-GEN.
132	M. floribunda 821 (PI 589827)	UNIV-GEN.
136	M. toringo (PI 589749)	UNIV-GEN.
144	M. x paradisiaca	ISF-BO
167	M. toringo MA-1255 (PI 589957)	UNIV-GEN.
168	M. sargentii Rosea [unknown] (PI 589400)	UNIV-GEN.
169	M. x hartwigii [Latvia] (PI 589867)	UNIV-GEN.
173	M. x hartwigii [unknown] (PI 589868)	UNIV-GEN.
176	M. spectabilis Aboplena [unknown] (PI 588921)	UNIV-GEN.
182	M. halliana Spontanea [unknown] (PI 589013)	UNIV-GEN.
186	M. x adstringens [unknown] (PI 588898)	UNIV-GEN.
187	M. sargentii [Japan] (PI 589372)	UNIV-GEN.
188	M. x robusta Cherry Crab [unknown] (PI 588904)	UNIV-GEN.
195	M. tschonoskii [unknown] (PI 589752)	UNIV-GEN.
196	M. x moerlandsii Profusion [The Netherlands] (PI 589449)	UNIV-GEN.
202	M. x moerlandsii [United Kingdom] (PI 437056)	UNIV-GEN.
207	M. x scheideckeri [unknown] (PI 589418)	UNIV-GEN.
222	M. x robusta Yellow Siberian [United Kingdom] (PI 215542)	[unknown]
231	M. toringo [Japan] (PI 613858)	[unknown]
249	M. x purpurea Kornicensis [Poland] (PI 588911)	[unknown]
258	M. x atrosanguinea 804 (PI 590221)	[unknown]
279	M. floribunda Peachblow (PI 483266)	UNIV-GEN.
281	M. micromalus (PI 594096)	UNIV-GEN.
300	M. evereste (Hybrid)	UNIV-GEN.
301	M. domestica cv. 'Golden Delicious'	UNIV-GEN.
