# Supplementary material for: De novo transcriptome assembly and functional analysis reveal a dihydrochalcone 3-hydroxylase(DHC3H) of wild Malus species that produces sieboldin in vivo
Source: Front Plant Sci. 2022 Dec 16;13:1072765. doi: 10.3389/fpls.2022.1072765 (PMC9800874; doi:10.3389/fpls.2022.1072765)
Supplement: Supplementary file 9 [file Table_2.xlsx]

## Sheet: Sheet1
Supplementary Table 2. Primers used in this study for cloning, gene expression analysis and HRM marker analysis
Gene description	Description	Forward primer 1 (5'-3')	Reverse primer (5'-3')
ACT2	qRT-PCR	TGGTGAGGCTCTATTCCAAC	TGGCATATACTCTGGAGGCT
UBI	qRT-PCR	CATCCCCCCAGACCAGCAGA	ACCACGGAGACGCAACACCAA
EF1a	qRT-PCR	TACTGGAACATCACAGGCTGAC	TGGACCTCTCAATCATGTTGTC
PAL1	qRT-PCR	CGAGGAGTGTGACAAGGTGT	AATGCAGCACTCAAGCCGAA
F3'H-like	qRT-PCR	AGGAGGCCTATGCGAACGAC	ATGGAGGCGCAGTAAGATGG
CYP98A2-like	qRT-PCR	ATCTCACTGTGGATTGGATCCGA	GCTTGCGCTCGATCTGTTCCTGGT
geraniol 8-hydroxylase-like	qRT-PCR	GCACATTGGAGTGGGCAATG	GGGAGTCCAGCAATGTGTGA
PGT2	qRT-PCR	ACTCGTTCATCGGCATAGC	TCGGGGTCTCGTGGTCAAG
CHS	qRT-PCR	CGGTGTTGATTTATCTATCTGCTTCG	TGCACCAAGTTAACCCCATGACG
F3'H-like-AvrII+FseI	Cloning in yeast, MCS1	AAAACCTAGGAAAAATGGAGTATTTTTCTTGTGCTGCA	AAAAGGCCGGCCCTAATAAAGATGGGCTGGCAGCCG
F3'H-like-SalI+NotI	Cloning in yeast, MCS2	AAAAGTCGACAAAAATGGAGTATTTTTCTTGTGCTGCA	AAAAGCGGCCGCCTAATAAAGATGGACTGGCAGCC
CYP98A-AvrII+FseI	Cloning in yeast, MCS1	AAAACCTAGGAAAAAATGGAAGCTACCGCTATTGTCTTG	AAAAGGCCGGCCTCAGCAGGTCTTACCCCAAAATTC
CYP98A-SalI+NotI	Cloning in yeast, MCS2	AAAAGTCGACAAAAATGGCTCTTTCTGGACTACTTCTC	AAAAGCGGCCGCTTACATATTCGCCGCCACTCGC
MdCYP98A-SalI+NotI	Cloning in yeast, MCS2	AAAAGTCGACAAAAATGGCTCTTTCTGGACTACTTCTC	AAAAGCGGCCGCTTACATATTCGCCGCCACTCGC
MtorPGT2-2-AvrII+FseI	Cloning in yeast, MCS1	AAAACCTAGGAAAAAATGGAAGCTACCGCTATTGTCTTG	AAAAGGCCGGCCTCAGCAGGTCTTACCCCAAAATTC
CYP98A-without stop codon	Gateway cloning	ATGGCTCTCTCTGGACTACTTCTCC	CATATTCACGGCCACACGC
HRM_CYP98A	HRM	TCTGGACTACTTCTCCCC	GGTAGAGCTTGTATGCAAGG
