# Supplementary material for: De novo transcriptome assembly and functional analysis reveal a dihydrochalcone 3-hydroxylase(DHC3H) of wild Malus species that produces sieboldin in vivo
Source: Front Plant Sci. 2022 Dec 16;13:1072765. doi: 10.3389/fpls.2022.1072765 (PMC9800874; doi:10.3389/fpls.2022.1072765)
Supplement: Supplementary file 10 [file Table_3.xlsx]

## Sheet: Sheet1
Supplementary Table 3. MRM parameters for metabolites analysed in this study. MS information for parent fragment ion (Q1) and quantifier and qualifier fragments (Q3) are reported, including limit of quantification (LOQ), electrospray (ES) ionisation polarity, correlation coefficient (R^2).
					Quantifier				Qualifier				Retention time
		LOQ	Linearity limit		Q1 Mass	Q3 Mass	Cone	Collision Energy	Q1 Mass	Q3 Mass	Cone	Collision Energy
Analyte	ES polarity	mg/L	mg/L	R^2	Da	Da	V	V	Da	Da	V	V	Min
Phloretin	-	0.044	45	0.990152	272.988	166.995	32	18	272.988	122.989	32	24	8.43
3-Hydroxyphloretin	+	0.06	61	0.990686	291.232	123.066	18	18	291.232	165.045	18	10	7.35
Phloridzin	-	0.044	45	0.980738	435.041	273.034	32	16	435.041	166.985	32	30	6.47
Trilobatin	-	0.044	45	0.99695	435.041	273.034	36	18	435.041	297.034	36	18	6.94
Sieboldin	-	0.049	12.5	0.979476	451.162	289.066	26	14	451.162	167.007	26	30	5.65
