# Supplementary material for: De novo transcriptome assembly and functional analysis reveal a dihydrochalcone 3-hydroxylase(DHC3H) of wild Malus species that produces sieboldin in vivo
Source: Front Plant Sci. 2022 Dec 16;13:1072765. doi: 10.3389/fpls.2022.1072765 (PMC9800874; doi:10.3389/fpls.2022.1072765)
Supplement: Supplementary file 11 [file Table_4.xlsx]

## Sheet: Sheet1
Supplementary Table 4. RNA-Seq statistics to reference M. x domestica genome
Library	Before filtering							After filtering									Mapped Reads		Unassigned
	Total Reads	Total bases	Q20		Q30		GC (%)	Filtered Reads		Total bases		Q20		Q30		GC (%)			MultiMapping		NoFeatures		Ambiguity
	M	Gb	Gb	%	Gb	%		M	%	Gb	%	Gb	%	Gb	%		M	%	M	%	M	%	M	%
M. x domestica cv. Golden Delicious R1	30.311	3.0311	2.96214	97.725	2.92135	96.3791	47.6694	29.7788	98.2443	2.95598	97.5218	2.91256	98.531	2.87332	97.2036	48.2453	19.9956	67.1472	10.51	30.3382	4.10026	11.8358	0.036889	0.106484
M. x domestica cv. Golden Delicious R2	32.7143	3.27143	3.18549	97.3729	3.13823	95.9284	46.2957	31.5496	96.4397	3.11078	95.0894	3.06188	98.4279	3.01784	97.0123	47.573	23.1634	73.4189	8.24676	23.4252	3.75128	10.6556	0.043315	0.123038
M. x domestica cv. Golden Delicious R3	28.1115	2.81115	2.7476	97.7393	2.70857	96.3509	46.8863	27.6652	98.4125	2.74398	97.6108	2.70212	98.4743	2.66448	97.1025	47.3757	21.4018	77.3598	5.90316	19.5663	2.82587	9.36652	0.039165	0.129815
Total M. x domestica cv. Golden Delicious	91.1368	9.11368	8.89523	97.603	8.76814	96.2086	46.9505	88.9936	97.6484	8.81075	96.6761	8.67656	98.477	8.55564	97.1046	47.7313	64.5607	72.5454	24.6599	24.4432	10.6774	10.6193	0.119369	0.119779
Malus micromalus R1	31.1341	3.11341	3.04271	97.7291	2.99946	96.3398	47.9164	30.7355	98.7198	3.04688	97.8629	3.00086	98.4898	2.95889	97.1122	48.2771	22.0892	71.8687	9.34523	26.738	3.47404	9.9397	0.042656	0.122045
Malus micromalus R2	39.1311	3.91311	3.81463	97.4834	3.76001	96.0876	48.1383	38.2068	97.638	3.78236	96.6589	3.72539	98.4937	3.67316	97.1129	48.9653	25.5466	66.864	13.9702	31.2968	5.07254	11.3638	0.048518	0.108692
Malus micromalus R3	28.4723	2.84723	2.77752	97.5517	2.73779	96.1563	46.9773	27.8818	97.9262	2.73006	95.8849	2.68857	98.4802	2.65092	97.1013	47.5686	21.4857	77.0601	6.48777	21.1921	2.59963	8.49161	0.041011	0.133961
Total Malus micromalus	98.7374	9.87374	9.63486	97.5806	9.49725	96.1869	47.6773	96.8241	98.0622	9.5593	96.8153	9.41482	98.4886	9.28298	97.1094	48.2703	69.1216	71.3888	29.8032	26.4089	11.1462	9.93169	0.132185	0.121566
Malus toringo R1	26.5586	2.65586	2.59325	97.6425	2.55656	96.2611	47.0569	26.0802	98.1987	2.58661	97.3925	2.54766	98.4942	2.51237	97.1301	47.6352	19.9116	76.3476	6.04667	21.239	2.47342	8.68792	0.037992	0.133447
Malus toringo R2	33.5108	3.35107	3.27557	97.7468	3.22822	96.3339	47.8699	32.9182	98.2317	3.25795	97.2211	3.20828	98.4753	3.1627	97.0762	48.4551	22.6818	68.9035	10.6745	28.4614	4.10617	10.9483	0.042781	0.114067
Malus toringo R3	22.4482	2.24482	2.19325	97.7025	2.16234	96.3255	47.3742	22.0988	98.4433	2.18557	97.3604	2.15267	98.4945	2.12291	97.1332	47.7417	16.5433	74.8607	5.55697	22.8608	2.17483	8.94703	0.032739	0.134685
Total Malus toringo	82.5176	8.25176	8.06206	97.7012	7.94712	96.3082	47.4337	81.0971	98.2786	8.03013	97.3142	7.9086	98.4866	7.79798	97.1091	47.944	59.1367	72.9208	22.2782	24.1871	8.75442	9.52773	0.113512	0.1274
