# Supplementary material for: De novo transcriptome assembly and functional analysis reveal a dihydrochalcone 3-hydroxylase(DHC3H) of wild Malus species that produces sieboldin in vivo
Source: Front Plant Sci. 2022 Dec 16;13:1072765. doi: 10.3389/fpls.2022.1072765 (PMC9800874; doi:10.3389/fpls.2022.1072765)
Supplement: Supplementary file 12 [file Table_5.xlsx]

## Sheet: Sheet1
Supplementary Table 5. RNA-Seq results of wild Malus species
																							Micromalus vs Apple											Toringo vs Apple
Gene_ID	Golden_R1	Golden_R2	Golden_R3	Micromalus_R1	Micromalus_R2	Micromalus_R3	Toringo_R1	Toringo_R2	Toringo_R3	norm.Golden_R1	norm.Golden_R2	norm.Golden_R3	norm.Micromalus_R1	norm.Micromalus_R2	norm.Micromalus_R3	norm.Toringo_R1	norm.Toringo_R2	norm.Toringo_R3	baseMean	Apple	Micromalus	Toringo	FoldChange	log2FoldChange	stat	pvalue	padj	dispGeneEst	dispFit	dispMAP	dispersion	betaConv	maxCooks	FoldChange	log2FoldChange	stat	pvalue	padj	dispGeneEst	dispFit	dispMAP	dispersion	betaConv	maxCooks
MD00G1000100	6	6	4	0	2	0	12	7	2	6	5	3	0	2	0	12	6	2	3.4	5	1	7	0.368	-1.44	-2.338	0.0193797	0.0351492	0	0.468	0.2893	0.2893	TRUE	0.1743	1.16	0.215	0.812	0.416919	0.516698	0	0.468	0.2893	0.2893	TRUE	0.1743
MD00G1000200	167	196	179	34	54	41	52	50	43	154	154	152	32	44	39	53	46	51	83.68	153	38	50	0.259	-1.949	-8.803	1.33628e-18	1.77268e-17	0.0189	0.0273	0.0226	0.0226	TRUE	0.4634	0.338	-1.564	-7.255	4.00257e-13	3.91234e-12	0.0189	0.0273	0.0226	0.0226	TRUE	0.4634
MD00G1000300	4	4	0	0	0	0	0	1	0	4	3	0	0	0	0	0	1	0	0.64	2	0	0	0.627	-0.675	-1.361	0.173454	NA	0	2.4338	4.3798	4.3798	TRUE	0.4542	0.771	-0.376	-0.94	0.347074	NA	0	2.4338	4.3798	4.3798	TRUE	0.4542
MD00G1000400	0	1	1	2	2	0	3	2	0	0	1	1	2	2	0	3	2	0	1.03	1	1	2	1.17	0.227	0.646	0.518392	0.603561	0	1.5242	0.8553	0.8553	TRUE	0.0639	1.26	0.333	0.968	0.332915	0.431445	0	1.5242	0.8553	0.8553	TRUE	0.0639
MD00G1000500	14	10	20	13	17	11	15	15	11	13	8	17	12	14	11	15	14	13	13.07	13	12	14	0.985	-0.021	-0.084	0.933282	0.957469	0	0.1283	0.0656	0.0656	TRUE	0.1534	1.06	0.085	0.393	0.69399	0.766987	0	0.1283	0.0656	0.0656	TRUE	0.1534
MD00G1000600	441	555	473	312	333	285	348	355	360	406	435	401	289	270	274	355	325	428	417.44	414	278	369	0.684	-0.547	-4.805	1.54553e-06	5.8761e-06	0.0057	0.0124	0.0078	0.0078	TRUE	0.1053	0.9	-0.153	-1.423	0.154797	0.229317	0.0057	0.0124	0.0078	0.0078	TRUE	0.1053
MD00G1000700	136	134	140	106	116	112	115	153	91	125	105	119	98	94	108	117	140	108	107.09	116	100	122	0.875	-0.192	-1.261	0.207418	0.279935	0.0062	0.0232	0.0134	0.0134	TRUE	0.1824	1.044	0.063	0.446	0.655542	0.734001	0.0062	0.0232	0.0134	0.0134	TRUE	0.1824
MD00G1000800	594	717	613	489	532	462	487	569	414	547	562	520	453	431	444	497	522	492	572.84	543	443	504	0.827	-0.274	-2.278	0.0227116	0.0405145	0.0098	0.0114	0.0102	0.0102	TRUE	0.1139	0.936	-0.095	-0.833	0.404696	0.504804	0.0098	0.0114	0.0102	0.0102	TRUE	0.1139
MD00G1000900	27	36	36	0	0	0	0	0	0	25	28	31	0	0	0	0	0	0	8.59	28	0	0	0.01	-6.618	-5.905	3.52787e-09	1.90025e-08	0	0.1907	0.1168	0.1168	TRUE	0.1288	0.012	-6.426	-5.739	9.52639e-09	5.71216e-08	0	0.1907	0.1168	0.1168	TRUE	0.1288
MD00G1001000	203	310	239	275	292	286	172	139	118	187	243	203	255	237	275	176	127	140	161.39	211	256	148	1.186	0.246	1.741	0.0816729	0.124824	0.0111	0.0183	0.014	0.014	TRUE	0.145	0.733	-0.448	-3.137	0.00170835	0.00435346	0.0111	0.0183	0.014	0.014	TRUE	0.145
MD00G1001200	3	3	2	0	0	2	0	0	0	3	2	2	0	0	2	0	0	0	1.2	2	1	0	0.727	-0.46	-1.157	0.247437	0.325821	0	1.3149	0.994	0.994	TRUE	0.1441	0.42	-1.253	-2.053	0.0400664	0.0723524	0	1.3149	0.994	0.994	TRUE	0.1441
MD00G1001300	0	0	0	0	0	0	0	0	0	0	0	0	0	0	0	0	0	0	0	0	0	0	1	0	NA	NA	NA	NA	NA	NA	NA	NA	NA	1	0	NA	NA	NA	NA	NA	NA	NA	NA	NA
MD00G1001400	1386	1579	1495	816	954	800	1010	1132	1051	1276	1239	1267	756	774	768	1031	1038	1249	1261.79	1261	766	1106	0.619	-0.693	-6.816	9.37285e-12	6.72529e-11	0.0056	0.0099	0.0071	0.0071	TRUE	0.0874	0.886	-0.175	-1.815	0.0694834	0.116164	0.0056	0.0099	0.0071	0.0071	TRUE	0.0874
MD00G1001500	677	841	775	781	849	793	763	1010	664	623	660	657	724	689	762	779	926	789	706.75	647	725	831	1.115	0.157	1.813	0.0698916	0.108998	0.0024	0.0108	0.0046	0.0046	TRUE	0.0603	1.27	0.345	4.045	5.23172e-05	0.00017895	0.0024	0.0108	0.0046	0.0046	TRUE	0.0603
MD00G1001700	0	0	0	0	0	0	0	0	0	0	0	0	0	0	0	0	0	0	0	0	0	0	1	0	NA	NA	NA	NA	NA	NA	NA	NA	NA	1	0	NA	NA	NA	NA	NA	NA	NA	NA	NA
MD00G1001800	252	328	275	166	198	162	202	221	169	232	257	233	154	161	156	206	203	201	305.62	241	157	203	0.681	-0.555	-3.452	0.00055586	0.00139761	0.0209	0.0137	0.0186	0.0186	TRUE	0.0625	0.871	-0.2	-1.373	0.169902	0.247951	0.0209	0.0137	0.0186	0.0186	TRUE	0.0625
MD00G1001900	152	172	159	290	345	268	226	248	212	140	135	135	269	280	257	231	227	252	268.6	137	269	237	1.91	0.933	6.615	3.7094e-11	2.49322e-10	0.0094	0.0144	0.011	0.011	TRUE	0.0394	1.669	0.739	5.274	1.33834e-07	6.87232e-07	0.0094	0.0144	0.011	0.011	TRUE	0.0394
MD00G1002000	67	71	68	13	19	16	9	11	12	62	56	58	12	15	15	9	10	14	41.41	59	14	11	0.259	-1.948	-7.001	2.54032e-12	1.93323e-11	0	0.0464	0.0218	0.0218	TRUE	0.0467	0.199	-2.328	-7.402	1.3379e-13	1.36724e-12	0	0.0464	0.0218	0.0218	TRUE	0.0467
MD00G1002100	3315	4080	3220	3967	4967	4132	3268	3412	2658	3051	3201	2729	3676	4028	3969	3337	3128	3160	3100.83	2994	3891	3208	1.277	0.352	2.914	0.00357131	0.00763219	0.0127	0.0091	0.0119	0.0119	TRUE	0.1947	1.063	0.088	0.767	0.442976	0.541931	0.0127	0.0091	0.0119	0.0119	TRUE	0.1947
MD00G1002200	6	9	6	5	3	5	3	5	3	6	7	5	5	2	5	3	5	4	4.35	6	4	4	0.834	-0.262	-0.884	0.376465	0.464078	0	0.3678	0.1414	0.1414	TRUE	0.1222	0.845	-0.242	-0.933	0.350744	0.450217	0	0.3678	0.1414	0.1414	TRUE	0.1222
MD00G1002500	0	0	1	1	0	0	0	1	0	0	0	1	1	0	0	0	1	0	0.3	0	0	0	1.007	0.01	0.026	0.979345	NA	0	5.222	4.7942	4.7942	TRUE	0.2275	1.023	0.033	0.094	0.925392	NA	0	5.222	4.7942	4.7942	TRUE	0.2275
MD00G1002600	3	19	15	10	9	7	7	9	6	3	15	13	9	7	7	7	8	7	6.35	10	8	7	0.883	-0.18	-0.632	0.527529	0.61204	0	0.2549	0.1868	0.1868	TRUE	0.5411	0.89	-0.168	-0.688	0.491573	0.588958	0	0.2549	0.1868	0.1868	TRUE	0.5411
MD00G1002700	0	0	0	0	0	0	0	0	0	0	0	0	0	0	0	0	0	0	0	0	0	0	1	0	NA	NA	NA	NA	NA	NA	NA	NA	NA	1	0	NA	NA	NA	NA	NA	NA	NA	NA	NA
MD00G1003400	9	7	13	12	20	19	5	11	5	8	5	11	11	16	18	5	10	6	7.95	8	15	7	1.428	0.514	1.715	0.0863582	0.131061	0.0059	0.2054	0.1109	0.1109	TRUE	0.2096	0.944	-0.083	-0.36	0.719202	0.787775	0.0059	0.2054	0.1109	0.1109	TRUE	0.2096
MD00G1003500	112	134	84	120	124	105	244	242	176	103	105	71	111	101	101	249	222	209	121.03	93	104	227	1.101	0.139	0.847	0.397253	0.485334	0.0138	0.0215	0.0173	0.0173	TRUE	0.215	2.364	1.241	7.01	2.377e-12	2.13689e-11	0.0138	0.0215	0.0173	0.0173	TRUE	0.215
MD00G1003600	105	138	129	98	134	88	390	419	251	97	108	109	91	109	85	398	384	298	142.53	105	95	360	0.917	-0.125	-0.798	0.424774	0.512782	0	0.0196	0.0143	0.0143	TRUE	0.1242	3.379	1.757	10.755	5.59392e-27	1.44558e-25	0	0.0196	0.0143	0.0143	TRUE	0.1242
MD00G1003800	1071	1231	1189	1094	1274	1085	683	891	724	986	966	1008	1014	1033	1042	697	817	861	907.59	987	1030	792	1.042	0.059	0.585	0.558532	0.640555	0.0058	0.0103	0.0073	0.0073	TRUE	0.0897	0.816	-0.294	-2.953	0.00314587	0.0075657	0.0058	0.0103	0.0073	0.0073	TRUE	0.0897
MD00G1003900	0	0	0	0	0	0	0	0	0	0	0	0	0	0	0	0	0	0	0	0	0	0	1	0	NA	NA	NA	NA	NA	NA	NA	NA	NA	1	0	NA	NA	NA	NA	NA	NA	NA	NA	NA
MD00G1004000	0	0	0	0	0	0	2	0	3	0	0	0	0	0	0	2	0	4	0.47	0	0	2	1	0	0	1	NA	12	3.3541	8.6651	8.6651	TRUE	0.0095	1.315	0.395	0.962	0.335958	NA	12	3.3541	8.6651	8.6651	TRUE	0.0095
MD00G1004100	737	858	733	895	1122	958	708	857	491	678	673	621	829	910	920	723	786	584	727.59	657	886	698	1.321	0.401	3.239	0.00119865	0.00282058	0.0112	0.0108	0.0116	0.0116	TRUE	0.1356	1.054	0.076	0.648	0.516963	0.612142	0.0112	0.0108	0.0116	0.0116	TRUE	0.1356
MD00G1004200	338	441	351	209	299	255	250	261	195	311	346	297	194	243	245	255	239	232	241.39	318	227	242	0.729	-0.456	-3.791	0.000149915	0.000417407	0.005	0.0151	0.0086	0.0086	TRUE	0.0907	0.782	-0.355	-3.048	0.00229993	0.00570622	0.005	0.0151	0.0086	0.0086	TRUE	0.0907
MD00G1004300	310	351	393	299	424	298	442	487	378	285	275	333	277	344	286	451	446	449	278.05	298	302	449	1.015	0.022	0.165	0.868918	0.905386	0.0098	0.0142	0.0119	0.0119	TRUE	0.3371	1.452	0.538	4.174	2.98891e-05	0.00010679	0.0098	0.0142	0.0119	0.0119	TRUE	0.3371
MD00G1004400	64	63	63	84	100	92	45	58	46	59	49	53	78	81	88	46	53	55	57.16	54	82	51	1.456	0.542	3.199	0.00138125	0.00320914	0	0.036	0.0133	0.0133	TRUE	0.0335	0.964	-0.054	-0.338	0.735312	0.801397	0	0.036	0.0133	0.0133	TRUE	0.0335
MD00G1004500	30	35	30	26	38	30	21	23	22	28	27	25	24	31	29	21	21	26	25.36	27	28	23	1.032	0.045	0.213	0.831179	0.874864	0	0.0703	0.026	0.026	TRUE	0.0476	0.9	-0.152	-0.795	0.426497	0.525911	0	0.0703	0.026	0.026	TRUE	0.0476
MD00G1004600	226	301	261	200	182	199	271	246	183	208	236	221	185	148	191	277	226	218	219.73	222	175	240	0.801	-0.321	-2.448	0.0143722	0.0268775	0.0071	0.0157	0.0102	0.0102	TRUE	0.1049	1.07	0.098	0.805	0.420801	0.520539	0.0071	0.0157	0.0102	0.0102	TRUE	0.1049
MD00G1004800	0	0	0	1	0	0	1	1	1	0	0	0	1	0	0	1	1	1	0.34	0	0	1	1.098	0.135	0.353	0.724162	NA	0	4.6376	4.2744	4.2744	TRUE	0.2275	1.311	0.39	0.966	0.333877	NA	0	4.6376	4.2744	4.2744	TRUE	0.2275
MD00G1004900	362	431	359	452	514	378	328	340	253	333	338	304	419	417	363	335	312	301	458.8	325	400	316	1.212	0.277	2.308	0.021012	0.0377955	0.0086	0.012	0.0096	0.0096	TRUE	0.1317	0.975	-0.037	-0.316	0.75208	0.814695	0.0086	0.012	0.0096	0.0096	TRUE	0.1317
MD00G1005000	4	4	2	2	3	3	4	5	5	4	3	2	2	2	3	4	5	6	2.6	3	2	5	0.945	-0.082	-0.274	0.784298	0.836282	0	0.6099	0.2416	0.2416	TRUE	0.1097	1.193	0.255	0.931	0.351872	0.451444	0	0.6099	0.2416	0.2416	TRUE	0.1097
MD00G1005100	226	238	253	290	399	283	255	310	217	208	187	214	269	324	272	260	284	258	249.64	203	288	267	1.364	0.448	2.79	0.0052628	0.0108762	0.0231	0.0149	0.0201	0.0201	TRUE	0.202	1.256	0.329	2.183	0.0290346	0.0546128	0.0231	0.0149	0.0201	0.0201	TRUE	0.202
MD00G1005200	0	0	0	0	0	0	0	0	0	0	0	0	0	0	0	0	0	0	0.3	0	0	0	1	0	0	1	NA	0	5.1524	7.0754	7.0754	TRUE	0.0387	1	0	0	1	NA	0	5.1524	7.0754	7.0754	TRUE	0.0387
MD00G1005300	48	40	49	44	39	41	41	54	43	44	31	42	41	32	39	42	50	51	109.31	39	37	48	0.964	-0.053	-0.274	0.784387	0.836345	0	0.0229	0.0191	0.0191	TRUE	0.0137	1.156	0.21	1.209	0.226487	0.314926	0	0.0229	0.0191	0.0191	TRUE	0.0137
MD00G1005400	3	2	0	29	19	32	17	9	6	3	2	0	27	15	31	17	8	7	11.31	2	24	11	14.412	3.849	5.278	1.30813e-07	5.74898e-07	0	0.1468	0.1163	0.1163	TRUE	0.2672	5.554	2.473	3.683	0.000230794	0.00070336	0	0.1468	0.1163	0.1163	TRUE	0.2672
MD00G1005500	6	13	12	14	15	11	11	15	7	6	10	10	13	12	11	11	14	8	11.95	9	12	11	1.194	0.256	0.954	0.339951	0.42588	0	0.1395	0.0765	0.0765	TRUE	0.1669	1.127	0.172	0.755	0.450202	0.549059	0	0.1395	0.0765	0.0765	TRUE	0.1669
MD00G1005600	1350	1696	1335	2246	2149	2096	2215	2339	1690	1243	1330	1131	2081	1743	2013	2262	2144	2009	1363.53	1235	1946	2138	1.55	0.632	6.476	9.41841e-11	6.0533e-10	0.0056	0.0098	0.0068	0.0068	TRUE	0.0625	1.703	0.768	7.821	5.23418e-15	6.08425e-14	0.0056	0.0098	0.0068	0.0068	TRUE	0.0625
MD00G1005700	9348	11505	8993	10836	11578	10533	11979	12619	8207	8605	9025	7622	10042	9390	10118	12233	11568	9756	8538.57	8417	9850	11186	1.161	0.215	2.121	0.0338803	0.0577658	0.0078	0.0088	0.0081	0.0081	TRUE	0.0762	1.303	0.382	3.839	0.000123508	0.000396217	0.0078	0.0088	0.0081	0.0081	TRUE	0.0762
MD00G1005800	290	353	322	0	0	0	0	0	0	267	277	273	0	0	0	0	0	0	68.06	272	0	0	0.001	-9.826	-8.988	2.50752e-19	3.50996e-18	0	0.0316	0.0175	0.0175	TRUE	0.0449	0.001	-9.635	-8.813	1.21299e-18	1.88468e-17	0	0.0316	0.0175	0.0175	TRUE	0.0449
MD00G1006000	251	300	281	0	0	0	0	0	0	231	235	238	0	0	0	0	0	0	58.71	235	0	0	0.001	-9.617	-8.799	1.37944e-18	1.82668e-17	0	0.0353	0.0195	0.0195	TRUE	0.0449	0.001	-9.428	-8.624	6.44686e-18	9.47216e-17	0	0.0353	0.0195	0.0195	TRUE	0.0449
MD00G1006100	0	0	0	34	40	41	70	92	66	0	0	0	32	32	39	71	84	78	32.92	0	34	78	130.941	7.033	6.476	9.39648e-11	6.04025e-10	0	0.0561	0.0275	0.0275	TRUE	0.198	287.729	8.169	7.486	7.11631e-14	7.49414e-13	0	0.0561	0.0275	0.0275	TRUE	0.198
MD00G1006200	1	1	0	61	37	51	138	150	95	1	1	0	57	30	49	141	138	113	55.32	1	45	131	56.115	5.81	6.017	1.7744e-09	9.91569e-09	0	0.0369	0.0333	0.0333	TRUE	0.3831	155.318	7.279	7.515	5.71198e-14	6.07009e-13	0	0.0369	0.0333	0.0333	TRUE	0.3831
MD00G1006400	0	0	0	0	0	0	0	1	0	0	0	0	0	0	0	0	1	0	0.08	0	0	0	1	0	0	1	NA	0	20.4757	12	12	TRUE	0.1613	1.074	0.103	0.283	0.77683	NA	0	20.4757	12	12	TRUE	0.1613
MD00G1006500	274	400	326	3	6	2	14	8	20	252	314	276	3	5	2	14	7	24	145.91	281	3	15	0.013	-6.315	-13.64	2.30753e-42	1.11605e-40	0	0.0193	0.0216	0.0216	TRUE	0.2362	0.053	-4.237	-14.976	1.05207e-50	7.48699e-49	0	0.0193	0.0216	0.0216	TRUE	0.2362
MD00G1006600	1719	2275	2285	1	1	2	4	2	2	1582	1785	1937	1	1	2	4	2	2	461.2	1768	1	3	0.001	-10.176	-13.875	8.95767e-44	4.57577e-42	0	0.012	0.0403	0.0403	TRUE	0.2053	0.002	-9.143	-16.582	9.41298e-62	9.2371e-60	0	0.012	0.0403	0.0403	TRUE	0.2053
MD00G1006700	232	293	294	70	97	58	21	23	22	214	230	249	65	79	56	21	21	26	116.66	231	67	23	0.295	-1.76	-10.396	2.57221e-25	5.40757e-24	0	0.022	0.0128	0.0128	TRUE	0.1267	0.1	-3.326	-14.688	7.65201e-49	5.05928e-47	0	0.022	0.0128	0.0128	TRUE	0.1267
MD00G1006800	187	225	236	108	157	91	157	161	160	172	177	200	100	127	87	160	148	190	121	183	105	166	0.604	-0.727	-4.488	7.20168e-06	2.47855e-05	0.012	0.0215	0.0161	0.0161	TRUE	0.1832	0.921	-0.118	-0.835	0.403915	0.503998	0.012	0.0215	0.0161	0.0161	TRUE	0.1832
MD00G1006900	358	420	363	222	253	209	397	411	398	330	329	308	206	205	201	405	377	473	402.47	322	204	418	0.656	-0.608	-4.261	2.03145e-05	6.51919e-05	0.0143	0.0125	0.0138	0.0138	TRUE	0.0817	1.253	0.326	2.489	0.0128103	0.0265446	0.0143	0.0125	0.0138	0.0138	TRUE	0.0817
MD00G1007000	2	2	0	5	4	8	21	35	29	2	2	0	5	3	8	21	32	34	11.88	1	5	29	2.394	1.259	2.492	0.012707	0.0240603	0	0.1402	0.0872	0.0872	TRUE	0.2044	21.554	4.43	5.754	8.71937e-09	5.25445e-08	0	0.1402	0.0872	0.0872	TRUE	0.2044
MD00G1007100	323	397	384	336	367	259	329	352	296	297	311	325	311	298	249	336	323	352	326.84	311	286	337	0.924	-0.114	-0.973	0.330758	0.416337	0.006	0.0134	0.0084	0.0084	TRUE	0.1143	1.071	0.099	0.888	0.374716	0.474664	0.006	0.0134	0.0084	0.0084	TRUE	0.1143
MD00G1007200	218	269	229	279	306	287	445	561	418	201	211	194	259	248	276	454	514	497	260	202	261	488	1.268	0.343	2.865	0.00417269	0.00880935	0.0023	0.0146	0.008	0.008	TRUE	0.2315	2.387	1.255	10.227	1.50212e-24	3.39505e-23	0.0023	0.0146	0.008	0.008	TRUE	0.2315
MD00G1007300	7	7	4	2	2	0	6	5	1	6	5	3	2	2	0	6	5	1	2.56	5	1	4	0.533	-0.908	-1.96	0.0500451	0.0814215	0	0.6198	0.3727	0.3727	TRUE	0.1468	0.935	-0.097	-0.376	0.707101	0.778018	0	0.6198	0.3727	0.3727	TRUE	0.1468
MD00G1007400	0	0	0	0	1	3	0	1	0	0	0	0	0	1	3	0	1	0	0.38	0	1	0	1.306	0.386	0.901	0.367423	NA	0	4.079	6.4802	6.4802	TRUE	0.0462	1.096	0.133	0.364	0.71571	NA	0	4.079	6.4802	6.4802	TRUE	0.0462
MD00G1007500	105	175	154	155	169	159	118	89	81	97	137	131	144	137	153	120	82	96	91.63	122	145	99	1.157	0.211	1.273	0.203172	0.275052	0	0.0257	0.0203	0.0203	TRUE	0.1667	0.852	-0.231	-1.467	0.142482	0.21368	0	0.0257	0.0203	0.0203	TRUE	0.1667
MD00G1007600	430	455	428	462	484	427	476	513	450	396	357	363	428	393	410	486	470	535	484.44	372	410	497	1.099	0.137	1.508	0.131513	0.189111	0	0.0119	0.0042	0.0042	TRUE	0.0246	1.315	0.395	4.435	9.19259e-06	3.57671e-05	0	0.0119	0.0042	0.0042	TRUE	0.0246
MD00G1007700	476	431	430	445	405	425	335	373	243	438	338	364	412	328	408	342	342	289	309.21	380	383	324	1.007	0.01	0.07	0.943826	0.965373	0.0141	0.0137	0.014	0.014	TRUE	0.1823	0.875	-0.193	-1.486	0.137288	0.207149	0.0141	0.0137	0.014	0.014	TRUE	0.1823
MD00G1007800	262	289	284	141	149	115	149	183	149	241	227	241	131	121	110	152	168	177	406.56	236	121	166	0.524	-0.932	-7.353	1.93591e-13	1.65233e-12	0	0.0125	0.007	0.007	TRUE	0.0235	0.722	-0.469	-3.993	6.53394e-05	0.000219663	0	0.0125	0.007	0.007	TRUE	0.0235
MD00G1007900	43	49	62	78	93	83	85	58	44	40	38	53	72	75	80	87	53	52	47.06	44	76	64	1.591	0.67	3.145	0.0016591	0.00379626	0	0.0419	0.031	0.031	TRUE	0.4219	1.333	0.415	2.152	0.0313909	0.0584757	0	0.0419	0.031	0.031	TRUE	0.4219
MD00G1008000	248	301	237	113	170	117	286	322	231	228	236	201	105	138	112	292	295	275	164.95	222	118	287	0.553	-0.856	-6.17	6.8377e-10	4.00028e-09	0	0.0181	0.0097	0.0097	TRUE	0.1307	1.26	0.333	2.744	0.00606296	0.0136009	0	0.0181	0.0097	0.0097	TRUE	0.1307
MD00G1008100	619	708	627	617	752	639	658	770	519	570	555	531	572	610	614	672	706	617	606.98	552	599	665	1.08	0.111	1.165	0.244151	0.322073	0.0035	0.0112	0.0057	0.0057	TRUE	0.0664	1.19	0.251	2.692	0.0070954	0.0156551	0.0035	0.0112	0.0057	0.0057	TRUE	0.0664
MD00G1008200	319	386	409	312	352	271	375	392	335	294	303	347	289	285	260	383	359	398	266.2	315	278	380	0.894	-0.161	-1.269	0.204521	0.276667	0.007	0.0145	0.0108	0.0108	TRUE	0.3506	1.181	0.24	1.991	0.04645	0.0822431	0.007	0.0145	0.0108	0.0108	TRUE	0.3506
MD00G1008300	0	0	0	0	0	0	0	0	0	0	0	0	0	0	0	0	0	0	0.36	0	0	0	1	0	0	1	NA	0	4.3118	10.1291	10.1291	TRUE	0.0282	1	0	0	1	NA	0	4.3118	10.1291	10.1291	TRUE	0.0282
MD00G1008400	129	150	171	191	232	186	183	192	138	119	118	145	177	188	179	187	176	164	190.56	127	181	176	1.364	0.448	2.678	0.00739551	0.0148037	0.0226	0.0168	0.0206	0.0206	TRUE	0.0557	1.304	0.383	2.422	0.0154475	0.0312927	0.0226	0.0168	0.0206	0.0206	TRUE	0.0557
MD00G1008500	2	3	0	9	3	5	12	24	19	2	2	0	8	2	5	12	22	23	20.08	1	5	19	2.019	1.014	2.28	0.0225846	0.0403207	0	0.0865	0.0906	0.0906	TRUE	0.273	11.229	3.489	4.915	8.86778e-07	4.03957e-06	0	0.0865	0.0906	0.0906	TRUE	0.273
MD00G1008600	14	30	31	16	20	16	31	28	17	13	24	26	15	16	15	32	26	20	15.86	21	15	26	0.822	-0.282	-1.128	0.259426	0.339247	0	0.1072	0.0606	0.0606	TRUE	0.118	1.126	0.171	0.815	0.415017	0.514887	0	0.1072	0.0606	0.0606	TRUE	0.118
MD00G1008700	1574	1672	1712	1820	2209	1870	1509	1639	1365	1449	1312	1451	1687	1792	1796	1541	1503	1623	1606.24	1404	1758	1556	1.239	0.31	3.089	0.00200608	0.00451595	0.0066	0.0096	0.0074	0.0074	TRUE	0.1516	1.099	0.136	1.397	0.162327	0.238633	0.0066	0.0096	0.0074	0.0074	TRUE	0.1516
MD00G1008800	0	1	1	0	0	1	0	0	0	0	1	1	0	0	1	0	0	0	0.22	1	0	0	0.949	-0.075	-0.195	0.845063	NA	0	7.2458	9.332	9.332	TRUE	0.2448	0.906	-0.142	-0.387	0.698454	NA	0	7.2458	9.332	9.332	TRUE	0.2448
MD00G1008900	1	0	0	0	0	0	0	0	1	1	0	0	0	0	0	0	0	1	0.18	0	0	0	0.948	-0.076	-0.2	0.841335	NA	0	8.9043	12	12	TRUE	0.2804	1.016	0.023	0.065	0.947985	NA	0	8.9043	12	12	TRUE	0.2804
MD00G1009000	1581	1942	1703	1605	1710	1538	1279	1347	1079	1455	1523	1443	1487	1387	1477	1306	1235	1283	1538.36	1474	1450	1275	0.984	-0.024	-0.396	0.691799	0.757938	0	0.0096	0.0021	0.0021	TRUE	0.0091	0.868	-0.205	-3.389	0.000702487	0.00194648	0	0.0096	0.0021	0.0021	TRUE	0.0091
MD00G1009200	0	0	0	0	0	0	0	0	0	0	0	0	0	0	0	0	0	0	0	0	0	0	1	0	NA	NA	NA	NA	NA	NA	NA	NA	NA	1	0	NA	NA	NA	NA	NA	NA	NA	NA	NA
MD00G1009300	35	45	39	19	22	13	27	25	22	32	35	33	18	18	12	28	23	26	43.38	33	16	26	0.533	-0.908	-3.749	0.000177403	0.000486853	0	0.0447	0.0174	0.0174	TRUE	0.0842	0.823	-0.281	-1.511	0.130904	0.199006	0	0.0447	0.0174	0.0174	TRUE	0.0842
MD00G1009400	0	0	0	0	0	0	0	0	0	0	0	0	0	0	0	0	0	0	0	0	0	0	1	0	NA	NA	NA	NA	NA	NA	NA	NA	NA	1	0	NA	NA	NA	NA	NA	NA	NA	NA	NA
MD00G1009500	27	38	16	26	14	25	11	28	17	25	30	14	24	11	24	11	26	20	17.04	23	20	19	0.919	-0.121	-0.475	0.635004	0.708537	0.0989	0.1004	0.0996	0.0996	TRUE	0.1863	0.918	-0.124	-0.565	0.571767	0.661614	0.0989	0.1004	0.0996	0.0996	TRUE	0.1863
MD00G1009600	0	0	0	0	3	2	0	0	0	0	0	0	0	2	2	0	0	0	0.36	0	1	0	1.258	0.332	0.799	0.424018	NA	0	4.3176	10.3699	10.3699	TRUE	0.0962	1	0	0	1	NA	0	4.3176	10.3699	10.3699	TRUE	0.0962
MD00G1009700	245	274	281	302	415	267	205	236	215	226	215	238	280	337	256	209	216	256	213.62	226	291	227	1.254	0.326	2.185	0.0289138	0.0502258	0.0173	0.0159	0.0167	0.0167	TRUE	0.4041	1.002	0.003	0.02	0.98421	0.993373	0.0173	0.0159	0.0167	0.0167	TRUE	0.4041
MD00G1009800	617	701	639	734	753	731	802	873	679	568	550	542	680	611	702	819	800	807	686.86	553	664	809	1.175	0.233	1.524	0.12761	0.184299	0.0263	0.0109	0.0202	0.0202	TRUE	0.648	1.387	0.472	3.165	0.00154882	0.00398371	0.0263	0.0109	0.0202	0.0202	TRUE	0.648
MD00G1009900	103	132	124	192	286	189	112	115	88	95	104	105	178	232	182	114	105	105	140.38	101	197	108	1.872	0.905	5.662	1.49762e-08	7.46507e-08	0.0114	0.0198	0.0144	0.0144	TRUE	0.096	1.055	0.077	0.53	0.596346	0.682926	0.0114	0.0198	0.0144	0.0144	TRUE	0.096
MD00G1010000	480	572	573	404	467	369	474	610	429	442	449	486	374	379	354	484	559	510	570.18	459	369	518	0.813	-0.299	-3.083	0.00204609	0.00459603	0.003	0.0114	0.0053	0.0053	TRUE	0.0447	1.12	0.163	1.759	0.0785108	0.129029	0.003	0.0114	0.0053	0.0053	TRUE	0.0447
MD00G1010100	0	0	0	0	0	0	0	0	0	0	0	0	0	0	0	0	0	0	0	0	0	0	1	0	NA	NA	NA	NA	NA	NA	NA	NA	NA	1	0	NA	NA	NA	NA	NA	NA	NA	NA	NA
MD00G1010200	44	62	53	102	119	92	56	69	58	41	49	45	95	97	88	57	63	69	50.24	45	93	63	1.968	0.977	5.187	2.14069e-07	9.14599e-07	0	0.0397	0.0156	0.0156	TRUE	0.0449	1.309	0.389	2.284	0.0223691	0.0434473	0	0.0397	0.0156	0.0156	TRUE	0.0449
MD00G1010300	0	0	0	0	0	0	0	1	0	0	0	0	0	0	0	0	1	0	0.08	0	0	0	1	0	0	1	NA	0	20.4757	12	12	TRUE	0.1613	1.074	0.103	0.283	0.77683	NA	0	20.4757	12	12	TRUE	0.1613
MD00G1010400	4	5	7	2	5	2	2	1	0	4	4	6	2	4	2	2	1	0	2.03	5	3	1	0.836	-0.258	-0.812	0.416531	0.504619	0	0.7799	0.3871	0.3871	TRUE	0.1844	0.577	-0.794	-1.833	0.0667496	0.112248	0	0.7799	0.3871	0.3871	TRUE	0.1844
MD00G1010500	18	19	22	0	1	0	0	0	0	17	15	19	0	1	0	0	0	0	4.24	17	0	0	0.034	-4.895	-4.284	1.83667e-05	5.94112e-05	0	0.377	0.2501	0.2501	TRUE	0.1673	0.02	-5.641	-4.85	1.23184e-06	5.49073e-06	0	0.377	0.2501	0.2501	TRUE	0.1673
MD00G1010600	4	10	9	2	2	4	2	2	2	4	8	8	2	2	4	2	2	2	2.94	7	3	2	0.651	-0.618	-1.665	0.0959321	0.143725	0	0.5406	0.2682	0.2682	TRUE	0.4878	0.625	-0.677	-1.815	0.0695603	0.116272	0	0.5406	0.2682	0.2682	TRUE	0.4878
MD00G1010700	17	16	23	8	6	4	3	1	3	16	13	19	7	5	4	3	1	4	5.95	16	5	3	0.487	-1.039	-2.64	0.00829617	0.0164285	0	0.2715	0.1425	0.1425	TRUE	0.1147	0.206	-2.277	-3.719	0.000200198	0.000617262	0	0.2715	0.1425	0.1425	TRUE	0.1147
MD00G1010800	0	0	0	17	24	9	1	1	0	0	0	0	16	19	9	1	1	0	3.82	0	15	1	51.44	5.685	4.775	1.79265e-06	6.74279e-06	0	0.4183	0.3265	0.3265	TRUE	0.0439	1.398	0.483	1.248	0.212101	0.298248	0	0.4183	0.3265	0.3265	TRUE	0.0439
MD00G1011000	13	17	15	14	15	18	1	1	0	12	13	13	13	12	17	1	1	0	6.94	13	14	1	1.059	0.083	0.316	0.75209	0.809369	0	0.2339	0.1014	0.1014	TRUE	0.1097	0.085	-3.561	-3.794	0.000148089	0.000468782	0	0.2339	0.1014	0.1014	TRUE	0.1097
MD00G1011100	1	1	0	1	2	1	3	4	0	1	1	0	1	2	1	3	4	0	1.22	1	1	2	1.168	0.225	0.642	0.521066	0.606069	0	1.2877	0.8406	0.8406	TRUE	0.7168	1.401	0.486	1.275	0.202269	0.286662	0	1.2877	0.8406	0.8406	TRUE	0.7168
MD00G1011200	2	3	0	6	15	6	1	1	1	2	2	0	6	12	6	1	1	1	2.69	1	8	1	2.635	1.398	2.496	0.0125427	0.0237903	0	0.5899	0.3564	0.3564	TRUE	0.4067	0.934	-0.098	-0.35	0.725984	0.793509	0	0.5899	0.3564	0.3564	TRUE	0.4067
MD00G1011300	3	4	4	2	0	0	1	5	4	3	3	3	2	0	0	1	5	5	1.79	3	1	4	0.583	-0.778	-1.672	0.0944408	0.141718	0	0.8812	0.5578	0.5578	TRUE	0.4873	1.026	0.037	0.14	0.888601	0.921261	0	0.8812	0.5578	0.5578	TRUE	0.4873
MD00G1011400	2	2	1	12	8	4	16	18	21	2	2	1	11	6	4	16	17	25	6.96	2	7	19	2.876	1.524	2.789	0.00528957	0.0109236	0	0.2333	0.1447	0.1447	TRUE	0.1991	11.015	3.461	4.648	3.34432e-06	1.39543e-05	0	0.2333	0.1447	0.1447	TRUE	0.1991
MD00G1011500	517	628	604	62	116	91	6	6	7	476	493	512	57	94	87	6	6	8	145.6	494	79	7	0.164	-2.608	-14.496	1.28205e-47	7.61269e-46	0	0.0194	0.0172	0.0172	TRUE	0.283	0.014	-6.173	-17.008	7.15472e-65	7.68874e-63	0	0.0194	0.0172	0.0172	TRUE	0.283
MD00G1011600	16	21	4	1	1	0	6	6	1	15	16	3	1	1	0	6	6	1	4.43	11	1	4	0.103	-3.283	-3.385	0.000712265	0.0017549	0	0.3616	0.3613	0.3613	TRUE	0.5692	0.676	-0.565	-1.66	0.0969344	0.154494	0	0.3616	0.3613	0.3613	TRUE	0.5692
MD00G1011700	229	255	288	101	110	99	143	198	173	211	200	244	94	89	95	146	182	206	130.97	218	93	178	0.437	-1.196	-7.517	5.61048e-14	5.06942e-13	0	0.0206	0.0127	0.0127	TRUE	0.0876	0.838	-0.256	-1.917	0.0552731	0.09556	0	0.0206	0.0127	0.0127	TRUE	0.0876
MD00G1011900	195	215	200	788	983	825	716	1005	765	179	169	170	730	797	793	731	921	909	745.4	173	773	854	4.429	2.147	14.744	3.34965e-49	2.13155e-47	0.0133	0.0107	0.0125	0.0125	TRUE	0.2188	4.899	2.292	15.703	1.45233e-55	1.21976e-53	0.0133	0.0107	0.0125	0.0125	TRUE	0.2188
MD00G1012000	2	1	2	7	15	15	17	19	12	2	1	2	6	12	14	17	17	14	9.13	2	11	16	5.696	2.51	3.814	0.000136727	0.000383551	0	0.1798	0.0943	0.0943	TRUE	0.2485	9.497	3.247	4.601	4.20755e-06	1.72607e-05	0	0.1798	0.0943	0.0943	TRUE	0.2485
MD00G1012100	3	7	8	8	11	6	9	7	2	3	5	7	7	9	6	9	6	2	5.17	5	7	6	1.181	0.24	0.817	0.41416	0.502244	0	0.3111	0.1851	0.1851	TRUE	0.2496	1.067	0.094	0.387	0.698911	0.77094	0	0.3111	0.1851	0.1851	TRUE	0.2496
MD00G1012200	101	117	106	531	534	485	442	466	332	93	92	90	492	433	466	451	427	395	250.91	92	464	424	5.022	2.328	18.341	3.91889e-75	5.57769e-73	0	0.0149	0.0061	0.0061	TRUE	0.0205	4.603	2.202	17.176	4.04041e-66	4.55187e-64	0	0.0149	0.0061	0.0061	TRUE	0.0205
MD00G1012300	622	738	623	760	894	778	724	765	590	573	579	528	704	725	747	739	701	701	819.26	560	725	714	1.288	0.365	4.987	6.13106e-07	2.46259e-06	0	0.0105	0.0027	0.0027	TRUE	0.0147	1.263	0.337	4.62	3.83216e-06	1.58199e-05	0	0.0105	0.0027	0.0027	TRUE	0.0147
MD00G1012400	223	291	261	298	315	294	215	224	188	205	228	221	276	255	282	220	205	223	190.19	218	271	216	1.226	0.294	2.705	0.00682515	0.0137699	0	0.0168	0.0059	0.0059	TRUE	0.0577	0.989	-0.016	-0.151	0.880155	0.915042	0	0.0168	0.0059	0.0059	TRUE	0.0577
MD00G1012500	1	1	1	2	1	1	0	1	0	1	1	1	2	1	1	0	1	0	0.59	1	1	0	1.071	0.099	0.294	0.76882	NA	0	2.6534	1.232	1.232	TRUE	0.1613	0.868	-0.204	-0.613	0.539823	NA	0	2.6534	1.232	1.232	TRUE	0.1613
MD00G1012600	314	375	402	499	660	533	347	411	266	289	294	341	462	535	512	354	377	316	293.67	308	503	349	1.588	0.667	5.206	1.92484e-07	8.26791e-07	0.0074	0.0139	0.0111	0.0111	TRUE	1.5174	1.117	0.16	1.316	0.188323	0.270215	0.0074	0.0139	0.0111	0.0111	TRUE	1.5174
MD00G1012700	3	15	7	2	2	4	0	1	0	3	12	6	2	2	4	0	1	0	2.39	7	3	0	0.676	-0.566	-1.498	0.134071	0.192178	0	0.6625	0.4819	0.4819	TRUE	0.0718	0.164	-2.607	-2.876	0.00402452	0.00943687	0	0.6625	0.4819	0.4819	TRUE	0.0718
MD00G1012800	0	0	0	0	0	0	0	0	0	0	0	0	0	0	0	0	0	0	0	0	0	0	1	0	NA	NA	NA	NA	NA	NA	NA	NA	NA	1	0	NA	NA	NA	NA	NA	NA	NA	NA	NA
MD00G1012900	10	17	11	1	1	0	6	1	2	9	13	9	1	1	0	6	1	2	5.7	10	1	3	0.094	-3.416	-3.645	0.000267579	0.00071292	0	0.2832	0.1481	0.1481	TRUE	0.4875	0.472	-1.082	-2.535	0.0112435	0.0236386	0	0.2832	0.1481	0.1481	TRUE	0.4875
MD00G1013000	121	154	117	11	17	12	8	10	6	111	121	99	10	14	12	8	9	7	117	110	12	8	0.11	-3.183	-11.855	2.01868e-32	6.02213e-31	0	0.022	0.0115	0.0115	TRUE	0.051	0.077	-3.707	-11.388	4.79568e-30	1.45865e-28	0	0.022	0.0115	0.0115	TRUE	0.051
MD00G1013300	26	40	44	12	19	13	0	1	3	24	31	37	11	15	12	0	1	4	68.15	31	13	2	0.485	-1.045	-3.693	0.000221195	0.000598054	0.0356	0.0316	0.0336	0.0336	TRUE	0.2074	0.052	-4.259	-5.872	4.3114e-09	2.6921e-08	0.0356	0.0316	0.0336	0.0336	TRUE	0.2074
MD00G1013500	93	127	129	110	97	107	88	96	90	86	100	109	102	79	103	90	88	107	91.71	98	95	95	0.963	-0.055	-0.347	0.728533	0.789027	0.0058	0.0257	0.0145	0.0145	TRUE	0.1128	0.969	-0.045	-0.306	0.759605	0.820558	0.0058	0.0257	0.0145	0.0145	TRUE	0.1128
MD00G1013600	1104	1430	1157	1458	1542	1252	1113	1018	832	1016	1122	981	1351	1251	1203	1137	933	989	854.68	1040	1268	1020	1.208	0.273	2.761	0.00576968	0.011817	0.0055	0.0105	0.007	0.007	TRUE	0.0969	0.982	-0.026	-0.273	0.785193	0.840481	0.0055	0.0105	0.007	0.007	TRUE	0.0969
MD00G1013700	4	4	2	0	0	0	9	13	18	4	3	2	0	0	0	9	12	21	5.22	3	0	14	0.148	-2.752	-3.017	0.00255573	0.00563923	0	0.308	0.1809	0.1809	TRUE	0.1058	3.383	1.758	3.234	0.00121965	0.0032076	0	0.308	0.1809	0.1809	TRUE	0.1058
MD00G1013800	270	348	261	10	12	5	13	8	10	249	273	221	9	10	5	13	7	12	70.09	248	8	11	0.033	-4.903	-15.132	9.98067e-52	7.02225e-50	0	0.0309	0.0196	0.0196	TRUE	0.0763	0.044	-4.498	-14.594	3.07405e-48	2.00404e-46	0	0.0309	0.0196	0.0196	TRUE	0.0763
MD00G1013900	1	0	1	3	3	3	10	6	7	1	0	1	3	2	3	10	6	8	3.02	1	3	8	1.77	0.824	1.777	0.0755475	0.116638	0	0.5259	0.2357	0.2357	TRUE	0.1163	6.778	2.761	3.162	0.00156622	0.00402289	0	0.5259	0.2357	0.2357	TRUE	0.1163
MD00G1014000	131	135	130	98	140	90	148	161	149	121	106	110	91	114	86	151	148	177	127.45	112	97	159	0.882	-0.181	-1.242	0.21419	0.287846	0	0.0209	0.0109	0.0109	TRUE	0.1179	1.351	0.434	3.145	0.00165808	0.00423723	0	0.0209	0.0109	0.0109	TRUE	0.1179
MD00G1014100	0	0	0	0	0	0	0	0	0	0	0	0	0	0	0	0	0	0	0	0	0	0	1	0	NA	NA	NA	NA	NA	NA	NA	NA	NA	1	0	NA	NA	NA	NA	NA	NA	NA	NA	NA
MD00G1014200	10	9	7	0	0	0	0	0	0	9	7	6	0	0	0	0	0	0	1.85	7	0	0	0.065	-3.946	-3.36	0.000780008	0.00190519	0	0.8539	0.8635	0.8635	TRUE	0.043	0.079	-3.654	-3.232	0.00122767	0.00322574	0	0.8539	0.8635	0.8635	TRUE	0.043
MD00G1014300	3672	3675	4167	3336	3690	3197	3387	4272	2525	3380	2883	3532	3092	2993	3071	3459	3916	3001	3170.64	3265	3052	3459	0.938	-0.092	-0.897	0.369694	0.456939	0.0075	0.0091	0.0082	0.0082	TRUE	0.0775	1.055	0.077	0.775	0.438343	0.537568	0.0075	0.0091	0.0082	0.0082	TRUE	0.0775
MD00G1014800	0	0	0	0	0	0	0	0	0	0	0	0	0	0	0	0	0	0	0.12	0	0	0	1	0	0	1	NA	0	12.7934	12	12	TRUE	0.32	1	0	0	1	NA	0	12.7934	12	12	TRUE	0.32
MD00G1014900	48	52	66	13	17	6	8	7	5	44	41	56	12	14	6	8	6	6	16.31	47	11	7	0.251	-1.993	-5.348	8.90815e-08	4.00512e-07	0.0134	0.1045	0.0643	0.0643	TRUE	0.7138	0.159	-2.655	-6.108	1.01143e-09	6.84381e-09	0.0134	0.1045	0.0643	0.0643	TRUE	0.7138
MD00G1015000	0	0	0	0	0	0	0	0	0	0	0	0	0	0	0	0	0	0	0	0	0	0	1	0	NA	NA	NA	NA	NA	NA	NA	NA	NA	1	0	NA	NA	NA	NA	NA	NA	NA	NA	NA
MD00G1015100	2	3	7	0	0	0	0	0	0	2	2	6	0	0	0	0	0	0	1.03	3	0	0	0.26	-1.941	-2.417	0.0156658	0.0290405	0	1.5332	1.2155	1.2155	TRUE	0.3688	0.312	-1.682	-2.301	0.0213808	0.0417495	0	1.5332	1.2155	1.2155	TRUE	0.3688
MD00G1015500	166	262	187	175	194	173	170	187	167	153	206	158	162	157	166	174	171	199	140.05	172	162	181	0.943	-0.084	-0.605	0.545016	0.628242	0.007	0.0198	0.012	0.012	TRUE	0.1595	1.039	0.056	0.426	0.669756	0.746286	0.007	0.0198	0.012	0.012	TRUE	0.1595
MD00G1015600	9	8	9	11	10	12	6	8	5	8	6	8	10	8	12	6	7	6	22.62	7	10	6	1.182	0.241	0.906	0.364804	0.451854	0	0.0777	0.0555	0.0555	TRUE	0.0925	0.948	-0.077	-0.342	0.732269	0.798687	0	0.0777	0.0555	0.0555	TRUE	0.0925
MD00G1015700	11	11	8	3	7	1	3	0	3	10	9	7	3	6	1	3	0	4	14.96	9	3	2	0.56	-0.837	-2.281	0.0225711	0.0403024	0.0233	0.1131	0.0782	0.0782	TRUE	0.2269	0.391	-1.354	-2.807	0.00499676	0.0114432	0.0233	0.1131	0.0782	0.0782	TRUE	0.2269
MD00G1015800	250	300	291	475	547	473	228	321	158	230	235	247	440	444	454	233	294	188	416.05	237	446	238	1.815	0.86	5.969	2.39258e-09	1.31495e-08	0.014	0.0124	0.014	0.014	TRUE	0.1074	1.007	0.01	0.077	0.938969	0.959713	0.014	0.0124	0.014	0.014	TRUE	0.1074
MD00G1016200	0	0	0	5	4	6	4	6	6	0	0	0	5	3	6	4	6	7	2.97	0	5	6	13.915	3.799	3.53	0.000415243	0.00106642	0	0.5353	0.2631	0.2631	TRUE	0.1543	18.319	4.195	3.752	0.000175309	0.000547144	0	0.5353	0.2631	0.2631	TRUE	0.1543
MD00G1016400	95	107	86	93	131	93	155	157	140	87	84	73	86	106	89	158	144	166	132.47	81	94	156	1.139	0.188	1.273	0.203139	0.275017	0	0.0204	0.0099	0.0099	TRUE	0.0694	1.848	0.886	5.856	4.74842e-09	2.95114e-08	0	0.0204	0.0099	0.0099	TRUE	0.0694
MD00G1016500	0	0	0	0	0	0	0	0	0	0	0	0	0	0	0	0	0	0	0	0	0	0	1	0	NA	NA	NA	NA	NA	NA	NA	NA	NA	1	0	NA	NA	NA	NA	NA	NA	NA	NA	NA
MD00G1016600	0	0	0	0	0	0	0	0	0	0	0	0	0	0	0	0	0	0	0.29	0	0	0	1	0	0	1	NA	0	5.4437	12	12	TRUE	0.0151	1	0	0	1	NA	0	5.4437	12	12	TRUE	0.0151
MD00G1016700	2479	2580	2907	2378	2917	2475	2186	2637	2206	2282	2024	2464	2204	2366	2378	2232	2417	2622	2248.69	2257	2316	2424	1.024	0.034	0.264	0.791673	0.842509	0.0158	0.0093	0.0141	0.0141	TRUE	0.3146	1.064	0.089	0.727	0.467285	0.56573	0.0158	0.0093	0.0141	0.0141	TRUE	0.3146
MD00G1016800	2014	2360	2121	1888	2204	1865	1694	1842	1393	1854	1851	1798	1750	1788	1792	1730	1689	1656	1657.46	1834	1777	1692	0.969	-0.046	-0.83	0.406759	0.494943	0	0.0096	0.0018	0.0018	TRUE	0.0086	0.924	-0.114	-2.063	0.0390664	0.070763	0	0.0096	0.0018	0.0018	TRUE	0.0086
MD00G1016900	3	2	4	5	12	8	1	2	0	3	2	3	5	10	8	1	2	0	2.72	3	8	1	1.608	0.685	1.775	0.0759263	0.117116	0	0.5837	0.3078	0.3078	TRUE	0.0877	0.774	-0.37	-1.144	0.252626	0.344426	0	0.5837	0.3078	0.3078	TRUE	0.0877
MD00G1017000	1312	1384	1451	1742	2172	1819	1113	1209	866	1208	1086	1230	1614	1762	1747	1137	1108	1029	1178.09	1175	1708	1091	1.437	0.523	5.789	7.07443e-09	3.66807e-08	0.0042	0.0099	0.0057	0.0057	TRUE	0.0772	0.935	-0.097	-1.1	0.271254	0.365058	0.0042	0.0099	0.0057	0.0057	TRUE	0.0772
MD00G1017100	720	797	834	682	742	715	543	573	472	663	625	707	632	602	687	554	525	561	541.23	665	640	547	0.966	-0.05	-0.359	0.719273	0.78129	0.0177	0.0115	0.0155	0.0155	TRUE	0.4518	0.846	-0.241	-1.833	0.0668361	0.112368	0.0177	0.0115	0.0155	0.0155	TRUE	0.4518
MD00G1017200	1258	1475	1442	2142	2445	2082	1529	1817	1104	1158	1157	1222	1985	1983	2000	1561	1666	1312	1184.3	1179	1989	1513	1.662	0.733	7.75	9.20164e-15	8.92636e-14	0.0046	0.0099	0.0062	0.0062	TRUE	0.1408	1.265	0.339	3.68	0.000233412	0.000710468	0.0046	0.0099	0.0062	0.0062	TRUE	0.1408
MD00G1017300	4578	5460	4904	6105	6824	5857	5152	5786	4118	4214	4283	4156	5658	5535	5626	5261	5304	4895	4472.38	4218	5606	5153	1.325	0.406	8.205	2.30866e-16	2.54703e-15	0.0004	0.009	0.0016	0.0016	TRUE	0.0115	1.218	0.284	5.756	8.59857e-09	5.18836e-08	0.0004	0.009	0.0016	0.0016	TRUE	0.0115
MD00G1017400	837	864	934	779	936	835	622	699	513	770	678	792	722	759	802	635	641	610	597.76	747	761	629	1.017	0.025	0.175	0.860917	0.89907	0.0222	0.0112	0.0171	0.0171	TRUE	0.4682	0.865	-0.209	-1.547	0.121928	0.187485	0.0222	0.0112	0.0171	0.0171	TRUE	0.4682
MD00G1017500	10	5	6	129	192	114	124	156	80	9	4	5	120	156	110	127	143	95	80.19	6	129	122	20.827	4.38	11.803	3.78389e-32	1.11543e-30	0.026	0.0281	0.0269	0.0269	TRUE	0.215	19.768	4.305	11.561	6.48447e-31	2.05968e-29	0.026	0.0281	0.0269	0.0269	TRUE	0.215
MD00G1017600	3	2	2	94	125	83	34	20	20	3	2	2	87	101	80	35	18	24	30.16	2	89	26	40.542	5.341	9.058	1.33285e-19	1.90374e-18	0	0.0605	0.0465	0.0465	TRUE	0.416	11.542	3.529	5.909	3.44832e-09	2.1813e-08	0	0.0605	0.0465	0.0465	TRUE	0.416
MD00G1017700	40	40	26	3	3	1	17	4	12	37	31	22	3	2	1	17	4	14	16.75	30	2	12	0.079	-3.665	-5.709	1.13821e-08	5.76291e-08	0	0.102	0.0987	0.0987	TRUE	0.4179	0.496	-1.013	-2.944	0.00323621	0.00776416	0	0.102	0.0987	0.0987	TRUE	0.4179
MD00G1017800	5	4	7	0	0	0	2	0	0	5	3	6	0	0	0	2	0	0	1.31	5	0	1	0.179	-2.481	-2.669	0.00761022	0.0151919	0	1.2025	1.2242	1.2242	TRUE	0.2631	0.598	-0.743	-1.61	0.107378	0.168481	0	1.2025	1.2242	1.2242	TRUE	0.2631
MD00G1018100	20	35	20	40	34	28	31	29	31	18	27	17	37	28	27	32	27	37	35.7	21	31	32	1.306	0.385	1.651	0.0986411	0.147157	0.031	0.0524	0.0403	0.0403	TRUE	0.3743	1.302	0.381	1.778	0.075389	0.124703	0.031	0.0524	0.0403	0.0403	TRUE	0.3743
MD00G1018200	1	0	1	0	1	0	2	2	1	1	0	1	0	1	0	2	2	1	0.71	1	0	2	0.901	-0.15	-0.425	0.671141	NA	0	2.2027	1.0828	1.0828	TRUE	0.1698	1.242	0.313	0.91	0.362944	NA	0	2.2027	1.0828	1.0828	TRUE	0.1698
MD00G1018300	0	0	0	0	0	0	0	0	0	0	0	0	0	0	0	0	0	0	0	0	0	0	1	0	NA	NA	NA	NA	NA	NA	NA	NA	NA	1	0	NA	NA	NA	NA	NA	NA	NA	NA	NA
MD00G1018400	8	20	12	5	8	5	15	22	10	7	16	10	5	6	5	15	20	12	161.78	11	5	16	0.603	-0.73	-2.39	0.0168611	0.0309989	0	0.0183	0.0229	0.0229	TRUE	0.0613	1.24	0.31	1.431	0.15242	0.226272	0	0.0183	0.0229	0.0229	TRUE	0.0613
MD00G1018600	1756	1931	1753	1666	1950	1715	1370	1746	1113	1616	1515	1486	1544	1582	1647	1399	1601	1323	1651.56	1539	1591	1441	1.031	0.043	0.319	0.749601	0.807251	0.0178	0.0096	0.0157	0.0157	TRUE	0.0636	0.946	-0.08	-0.626	0.531174	0.625374	0.0178	0.0096	0.0157	0.0157	TRUE	0.0636
MD00G1018700	29	50	42	21	20	25	14	16	5	27	39	36	19	16	24	14	15	6	17.27	34	20	12	0.694	-0.526	-1.966	0.0493427	0.0803946	0.0331	0.0992	0.0769	0.0769	TRUE	1.0534	0.421	-1.249	-3.531	0.000414218	0.00120269	0.0331	0.0992	0.0769	0.0769	TRUE	1.0534
MD00G1018800	0	0	2	0	1	0	0	0	0	0	0	2	0	1	0	0	0	0	0.39	1	0	0	0.928	-0.107	-0.284	0.776631	NA	0	4.0125	4.1946	4.1946	TRUE	0.487	0.871	-0.199	-0.546	0.584977	NA	0	4.0125	4.1946	4.1946	TRUE	0.487
MD00G1018900	3884	4493	4030	5798	5693	5287	3572	4248	3086	3575	3525	3415	5373	4617	5079	3648	3894	3668	3532.81	3505	5023	3737	1.408	0.494	4.625	3.75426e-06	1.34521e-05	0.009	0.0091	0.0089	0.0089	TRUE	0.1502	1.06	0.084	0.821	0.411379	0.511464	0.009	0.0091	0.0089	0.0089	TRUE	0.1502
MD00G1019100	362	446	406	310	335	289	440	466	363	333	350	344	287	272	278	449	427	431	318.96	342	279	436	0.827	-0.274	-2.171	0.0299169	0.05172	0.0087	0.0135	0.0106	0.0106	TRUE	0.2687	1.24	0.31	2.588	0.00964221	0.0206275	0.0087	0.0135	0.0106	0.0106	TRUE	0.2687
MD00G1019200	891	1046	869	105	107	87	69	65	64	820	821	736	97	87	84	70	60	76	377.3	792	89	69	0.113	-3.144	-23.629	1.92709e-123	7.64481e-121	0	0.0128	0.0073	0.0073	TRUE	0.0665	0.087	-3.53	-24.226	1.19857e-129	5.25821e-127	0	0.0128	0.0073	0.0073	TRUE	0.0665
MD00G1019700	2889	3262	3406	2618	3209	2715	2433	2960	2225	2659	2559	2887	2426	2603	2608	2484	2714	2645	2604.06	2702	2546	2614	0.945	-0.081	-0.791	0.428701	0.516636	0.0077	0.0092	0.0081	0.0081	TRUE	0.142	0.97	-0.043	-0.436	0.662679	0.740347	0.0077	0.0092	0.0081	0.0081	TRUE	0.142
MD00G1019800	0	0	0	0	0	0	0	0	0	0	0	0	0	0	0	0	0	0	0	0	0	0	1	0	NA	NA	NA	NA	NA	NA	NA	NA	NA	1	0	NA	NA	NA	NA	NA	NA	NA	NA	NA
MD00G1019900	0	0	0	0	0	0	0	0	0	0	0	0	0	0	0	0	0	0	0	0	0	0	1	0	NA	NA	NA	NA	NA	NA	NA	NA	NA	1	0	NA	NA	NA	NA	NA	NA	NA	NA	NA
MD00G1020000	88	104	129	9	6	5	9	17	27	81	82	109	8	5	5	9	16	32	43.17	91	6	19	0.069	-3.855	-9.09	9.91866e-20	1.42861e-18	0.0676	0.0448	0.0546	0.0546	TRUE	0.8333	0.218	-2.196	-6.579	4.75203e-11	3.72667e-10	0.0676	0.0448	0.0546	0.0546	TRUE	0.8333
MD00G1020100	136	168	176	44	56	41	61	80	71	125	132	149	41	45	39	62	73	84	100.17	135	42	73	0.322	-1.634	-7.436	1.03905e-13	9.12747e-13	0.0229	0.0242	0.0234	0.0234	TRUE	0.0458	0.58	-0.786	-4.113	3.90021e-05	0.000136536	0.0229	0.0242	0.0234	0.0234	TRUE	0.0458
MD00G1020200	121	137	159	19	34	31	56	57	54	111	107	135	18	28	30	57	52	64	83.82	118	25	58	0.218	-2.196	-10.092	6.01704e-24	1.16196e-22	0	0.0273	0.0138	0.0138	TRUE	0.204	0.511	-0.967	-5.394	6.90633e-08	3.67228e-07	0	0.0273	0.0138	0.0138	TRUE	0.204
MD00G1020300	53	61	74	8	20	14	21	34	46	49	48	63	7	16	13	21	31	55	38.56	53	12	36	0.266	-1.909	-4.809	1.52014e-06	5.78724e-06	0.1263	0.0492	0.0927	0.0927	TRUE	0.591	0.794	-0.333	-1.454	0.145959	0.218097	0.1263	0.0492	0.0927	0.0927	TRUE	0.591
MD00G1020400	37	59	78	7	8	6	13	25	19	34	46	66	6	6	6	13	23	23	30.9	49	6	20	0.136	-2.874	-7.04	1.92101e-12	1.48084e-11	0	0.0592	0.0477	0.0477	TRUE	0.0763	0.453	-1.142	-3.897	9.74589e-05	0.000317929	0	0.0592	0.0477	0.0477	TRUE	0.0763
MD00G1020500	21	18	26	1	0	1	2	4	0	19	14	22	1	0	1	2	4	0	9.4	18	1	2	0.046	-4.43	-4.524	6.07671e-06	2.11539e-05	0	0.1749	0.0908	0.0908	TRUE	0.288	0.135	-2.893	-4.454	8.44152e-06	3.3024e-05	0	0.1749	0.0908	0.0908	TRUE	0.288
MD00G1020600	233	269	254	64	61	41	84	95	71	214	211	215	59	49	39	86	87	84	118.4	213	49	86	0.239	-2.067	-9.332	1.03891e-20	1.58775e-19	0.0289	0.0218	0.0258	0.0258	TRUE	0.5296	0.419	-1.255	-6.071	1.26912e-09	8.48738e-09	0.0289	0.0218	0.0258	0.0258	TRUE	0.5296
MD00G1020700	174	219	286	2	4	6	9	9	17	160	172	242	2	3	6	9	8	20	76.85	191	4	12	0.022	-5.522	-8.242	1.69434e-16	1.89394e-15	0.2219	0.029	0.1253	0.2219	TRUE	0.2107	0.072	-3.806	-6.499	8.07242e-11	6.1862e-10	0.2219	0.029	0.1253	0.2219	TRUE	0.2107
MD00G1021100	85	95	126	12	25	21	12	24	32	78	75	107	11	20	20	12	22	38	39.66	87	17	24	0.221	-2.178	-5.427	5.72997e-08	2.65034e-07	0.1502	0.048	0.1017	0.1017	TRUE	0.496	0.315	-1.668	-4.403	1.06705e-05	4.10634e-05	0.1502	0.048	0.1017	0.1017	TRUE	0.496
MD00G1021200	0	0	0	0	0	0	0	0	0	0	0	0	0	0	0	0	0	0	0	0	0	0	1	0	NA	NA	NA	NA	NA	NA	NA	NA	NA	1	0	NA	NA	NA	NA	NA	NA	NA	NA	NA
MD00G1021300	31	27	36	1	2	4	3	1	4	29	21	31	1	2	4	3	1	5	9.78	27	2	3	0.09	-3.48	-5.504	3.71848e-08	1.76123e-07	0	0.1685	0.091	0.091	TRUE	0.2771	0.12	-3.063	-5.121	3.04538e-07	1.48836e-06	0	0.1685	0.091	0.091	TRUE	0.2771
MD00G1021400	91	88	93	10	10	3	7	16	22	84	69	79	9	8	3	7	15	26	35.75	77	7	16	0.094	-3.414	-7.551	4.33451e-14	3.95676e-13	0.1225	0.0524	0.0836	0.0836	TRUE	0.4309	0.224	-2.161	-5.572	2.51418e-08	1.42397e-07	0.1225	0.0524	0.0836	0.0836	TRUE	0.4309
MD00G1021500	157	164	185	24	45	22	22	25	26	145	129	157	22	36	21	22	23	31	58.28	144	26	25	0.195	-2.36	-8.673	4.21066e-18	5.32797e-17	0.0372	0.0355	0.0362	0.0362	TRUE	0.3127	0.183	-2.452	-8.704	3.19751e-18	4.80593e-17	0.0372	0.0355	0.0362	0.0362	TRUE	0.3127
MD00G1021600	37	51	52	10	17	6	13	21	15	34	40	44	9	14	6	13	19	18	19.25	39	10	17	0.272	-1.876	-5.387	7.17029e-08	3.27391e-07	0	0.0898	0.0441	0.0441	TRUE	0.2966	0.491	-1.026	-3.569	0.000357984	0.00105236	0	0.0898	0.0441	0.0441	TRUE	0.2966
MD00G1021700	33	19	24	3	5	3	4	3	7	30	15	20	3	4	3	4	3	8	8.36	22	3	5	0.183	-2.452	-4.382	1.17366e-05	3.91606e-05	0	0.1957	0.1243	0.1243	TRUE	0.0782	0.289	-1.79	-3.659	0.000253414	0.000765973	0	0.1957	0.1243	0.1243	TRUE	0.0782
MD00G1021800	334	348	426	41	43	25	38	35	58	307	273	361	38	35	24	39	32	69	119.36	314	32	47	0.105	-3.25	-12.884	5.57389e-38	2.21353e-36	0.0414	0.0217	0.0314	0.0314	TRUE	0.2238	0.15	-2.741	-11.216	3.40376e-29	9.88523e-28	0.0414	0.0217	0.0314	0.0314	TRUE	0.2238
MD00G1021900	7	6	8	0	0	0	0	0	0	6	5	7	0	0	0	0	0	0	1.68	6	0	0	0.071	-3.815	-3.38	0.000726065	0.00178595	0	0.9416	0.6197	0.6197	TRUE	0.0709	0.087	-3.523	-3.244	0.00117975	0.00311697	0	0.9416	0.6197	0.6197	TRUE	0.0709
MD00G1022000	17	36	28	61	83	54	87	100	69	16	28	24	57	67	52	89	92	82	44.54	23	59	88	2.403	1.265	5.173	2.29931e-07	9.78557e-07	0	0.0437	0.0242	0.0242	TRUE	0.2944	3.693	1.885	7.482	7.3073e-14	7.68008e-13	0	0.0437	0.0242	0.0242	TRUE	0.2944
MD00G1022100	27	28	38	89	114	91	166	167	135	25	22	32	82	92	87	170	153	160	71.59	26	87	161	3.213	1.684	7.912	2.52753e-15	2.56328e-14	0	0.0305	0.0134	0.0134	TRUE	0.1316	6.012	2.588	12.257	1.53261e-34	5.72654e-33	0	0.0305	0.0134	0.0134	TRUE	0.1316
MD00G1022200	281	350	287	236	271	235	299	327	335	259	275	243	219	220	226	305	300	398	664.85	259	222	334	0.87	-0.201	-1.384	0.166392	0.231573	0.0177	0.011	0.0155	0.0155	TRUE	0.0201	1.242	0.312	2.272	0.023062	0.0446048	0.0177	0.011	0.0155	0.0155	TRUE	0.0201
MD00G1022400	109	122	104	21	39	28	41	28	33	100	96	88	19	32	27	42	26	39	52.15	95	26	36	0.288	-1.796	-7.549	4.37773e-14	3.99133e-13	0	0.0386	0.022	0.022	TRUE	0.2423	0.391	-1.356	-5.963	2.4743e-09	1.5919e-08	0	0.0386	0.022	0.022	TRUE	0.2423
MD00G1022500	0	0	0	0	0	0	0	0	0	0	0	0	0	0	0	0	0	0	0	0	0	0	1	0	NA	NA	NA	NA	NA	NA	NA	NA	NA	1	0	NA	NA	NA	NA	NA	NA	NA	NA	NA
MD00G1022600	0	0	0	0	0	0	0	0	0	0	0	0	0	0	0	0	0	0	0	0	0	0	1	0	NA	NA	NA	NA	NA	NA	NA	NA	NA	1	0	NA	NA	NA	NA	NA	NA	NA	NA	NA
MD00G1022700	0	0	0	0	0	0	0	0	0	0	0	0	0	0	0	0	0	0	0	0	0	0	1	0	NA	NA	NA	NA	NA	NA	NA	NA	NA	1	0	NA	NA	NA	NA	NA	NA	NA	NA	NA
MD00G1022900	2478	2938	2751	2382	2545	2212	1715	1874	1571	2281	2305	2331	2207	2064	2125	1751	1718	1867	1896.52	2306	2132	1779	0.926	-0.11	-1.566	0.117275	0.171115	0.0017	0.0094	0.0034	0.0034	TRUE	0.0344	0.778	-0.362	-5.135	2.81915e-07	1.38324e-06	0.0017	0.0094	0.0034	0.0034	TRUE	0.0344
MD00G1023000	443	536	416	258	316	283	108	134	94	408	420	353	239	256	272	110	123	112	227.12	394	256	115	0.672	-0.574	-4.089	4.34106e-05	0.000132081	0.0121	0.0155	0.0139	0.0139	TRUE	0.2923	0.298	-1.747	-10.797	3.57255e-27	9.32917e-26	0.0121	0.0155	0.0139	0.0139	TRUE	0.2923
MD00G1023100	0	0	0	2	0	0	0	0	0	0	0	0	2	0	0	0	0	0	0.15	0	1	0	1.13	0.177	0.453	0.650218	NA	0	10.1318	12	12	TRUE	0.4871	1	0	0	1	NA	0	10.1318	12	12	TRUE	0.4871
MD00G1023300	34	46	52	103	104	94	33	45	54	31	36	44	95	84	90	34	41	64	94.2	37	90	46	2.192	1.132	4.362	1.29027e-05	4.27643e-05	0.0587	0.0252	0.0451	0.0451	TRUE	0.2047	1.145	0.195	1	0.317112	0.41477	0.0587	0.0252	0.0451	0.0451	TRUE	0.2047
MD00G1023400	0	0	0	1	1	2	0	0	1	0	0	0	1	1	2	0	0	1	0.4	0	1	0	1.411	0.497	1.112	0.266058	NA	0	3.8791	3.7355	3.7355	TRUE	0.2804	1.116	0.158	0.443	0.657873	NA	0	3.8791	3.7355	3.7355	TRUE	0.2804
MD00G1023500	6	12	7	26	41	35	27	29	26	6	9	6	24	33	34	28	27	31	79.71	7	30	29	3.986	1.995	5.981	2.22354e-09	1.22729e-08	0	0.0282	0.0147	0.0147	TRUE	0.1333	3.688	1.883	5.568	2.57877e-08	1.45789e-07	0	0.0282	0.0147	0.0147	TRUE	0.1333
MD00G1023600	64	50	67	219	240	207	267	280	223	59	39	57	203	195	199	273	257	265	637.8	52	199	265	3.774	1.916	10.021	1.23837e-23	2.34173e-22	0.0201	0.0111	0.0168	0.0168	TRUE	0.024	5.061	2.339	12.21	2.7639e-34	1.02451e-32	0.0201	0.0111	0.0168	0.0168	TRUE	0.024
MD00G1023700	204	233	204	93	109	80	76	105	77	188	183	173	86	88	77	78	96	92	129.7	181	84	89	0.477	-1.068	-7.36	1.83634e-13	1.57058e-12	0	0.0207	0.0087	0.0087	TRUE	0.0586	0.503	-0.992	-6.749	1.48657e-11	1.23903e-10	0	0.0207	0.0087	0.0087	TRUE	0.0586
MD00G1023800	0	1	1	0	0	0	0	0	0	0	1	1	0	0	0	0	0	0	0.49	1	0	0	0.841	-0.249	-0.632	0.527264	NA	0	3.2219	3.6725	3.6725	TRUE	0.018	0.87	-0.202	-0.556	0.577869	NA	0	3.2219	3.6725	3.6725	TRUE	0.018
MD00G1024000	31	27	48	28	20	11	20	28	35	29	21	41	26	16	11	20	26	42	29.45	30	18	29	0.699	-0.517	-1.911	0.0560271	0.0898564	0.0926	0.0617	0.0787	0.0787	TRUE	0.2829	0.981	-0.028	-0.136	0.891843	0.923595	0.0926	0.0617	0.0787	0.0787	TRUE	0.2829
MD00G1024100	21	18	33	22	29	19	25	41	31	19	14	28	20	24	18	26	38	37	26.92	20	21	34	1.012	0.017	0.074	0.940703	0.9631	0.0347	0.0667	0.0493	0.0493	TRUE	0.2086	1.384	0.469	2.049	0.0404846	0.0730072	0.0347	0.0667	0.0493	0.0493	TRUE	0.2086
MD00G1024200	38	40	58	46	83	32	62	62	71	35	31	49	43	67	31	63	57	84	58.5	38	47	68	1.153	0.205	0.897	0.369836	0.45707	0.0721	0.0354	0.0567	0.0567	TRUE	0.4262	1.51	0.594	2.534	0.0112842	0.0237131	0.0721	0.0354	0.0567	0.0567	TRUE	0.4262
MD00G1024300	33	56	35	73	63	70	27	50	56	30	44	30	68	51	67	28	46	67	59.67	35	62	47	1.596	0.674	2.96	0.00307929	0.00667132	0.0393	0.0348	0.0372	0.0372	TRUE	0.1626	1.211	0.276	1.417	0.156451	0.231344	0.0393	0.0348	0.0372	0.0372	TRUE	0.1626
MD00G1024400	60	59	81	13	31	14	14	12	20	55	46	69	12	25	13	14	11	24	51.55	57	17	16	0.357	-1.486	-3.961	7.44944e-05	0.000218405	0.1547	0.039	0.1046	0.1046	TRUE	0.0274	0.334	-1.583	-4.052	5.08244e-05	0.000174419	0.1547	0.039	0.1046	0.1046	TRUE	0.0274
MD00G1024500	169	185	224	31	45	39	27	27	17	156	145	190	29	36	37	28	25	20	120.75	164	34	24	0.217	-2.204	-8.908	5.20743e-19	7.09741e-18	0.0361	0.0216	0.0305	0.0305	TRUE	0.0215	0.153	-2.709	-10.011	1.35856e-23	2.89987e-22	0.0361	0.0216	0.0305	0.0305	TRUE	0.0215
MD00G1024600	0	0	0	0	0	0	0	0	0	0	0	0	0	0	0	0	0	0	0	0	0	0	1	0	NA	NA	NA	NA	NA	NA	NA	NA	NA	1	0	NA	NA	NA	NA	NA	NA	NA	NA	NA
MD00G1024700	1	5	4	7	15	9	3	4	7	1	4	3	6	12	9	3	4	8	6.81	3	9	5	2.101	1.071	2.536	0.0112187	0.0215287	0	0.2381	0.1272	0.1272	TRUE	0.2595	1.23	0.299	1.098	0.272187	0.366024	0	0.2381	0.1272	0.1272	TRUE	0.2595
MD00G1024800	29	33	19	2	0	0	0	0	1	27	26	16	2	0	0	0	0	1	1871.6	23	1	0	0.036	-4.808	-5.058	4.2269e-07	1.73649e-06	0	0.0095	0.0112	0.0112	TRUE	0.4166	0.025	-5.313	-4.974	6.56476e-07	3.05275e-06	0	0.0095	0.0112	0.0112	TRUE	0.4166
MD00G1024900	0	0	0	0	1	0	0	0	2	0	0	0	0	1	0	0	0	2	0.42	0	0	1	1.085	0.118	0.306	0.759672	NA	0	3.7578	6.3498	6.3498	TRUE	0.4873	1.202	0.265	0.692	0.489156	NA	0	3.7578	6.3498	6.3498	TRUE	0.4873
MD00G1025200	2155	2377	2454	2177	2707	2190	2000	2316	2102	1984	1865	2080	2017	2195	2104	2042	2123	2499	2549.57	1976	2105	2221	1.062	0.087	0.822	0.411234	0.499474	0.0083	0.0092	0.0086	0.0086	TRUE	0.1157	1.112	0.153	1.505	0.132413	0.200931	0.0083	0.0092	0.0086	0.0086	TRUE	0.1157
MD00G1025500	2592	2737	3003	4255	5382	4340	2763	3492	2605	2386	2147	2545	3943	4365	4169	2821	3201	3097	2798.49	2359	4159	3040	1.698	0.764	5.22	1.78598e-07	7.70469e-07	0.0217	0.0092	0.0174	0.0174	TRUE	0.3912	1.243	0.314	2.329	0.0198357	0.0390638	0.0217	0.0092	0.0174	0.0174	TRUE	0.3912
MD00G1025600	315	351	311	298	379	311	309	262	218	290	275	264	276	307	299	316	240	259	285.25	276	294	272	1.059	0.083	0.624	0.532424	0.616606	0.0113	0.0141	0.0123	0.0123	TRUE	0.1965	0.985	-0.021	-0.167	0.866977	0.905286	0.0113	0.0141	0.0123	0.0123	TRUE	0.1965
MD00G1025700	230	288	233	219	242	196	278	316	211	212	226	197	203	196	188	284	290	251	277.22	212	196	275	0.932	-0.102	-0.746	0.455935	0.543276	0.0112	0.0143	0.0122	0.0122	TRUE	0.1986	1.256	0.329	2.529	0.011431	0.0239958	0.0112	0.0143	0.0122	0.0122	TRUE	0.1986
MD00G1025800	563	687	539	611	831	697	503	761	474	518	539	457	566	674	670	514	698	563	711.13	505	637	592	1.243	0.313	2.672	0.0075444	0.0150694	0.0088	0.0108	0.0098	0.0098	TRUE	0.1479	1.154	0.206	1.827	0.0676893	0.113572	0.0088	0.0108	0.0098	0.0098	TRUE	0.1479
MD00G1025900	139	159	160	3	2	9	23	34	32	128	125	136	3	2	9	23	31	38	95.96	130	5	31	0.034	-4.882	-11.957	5.9393e-33	1.82887e-31	0	0.0249	0.0133	0.0133	TRUE	0.6934	0.243	-2.039	-9.642	5.31742e-22	1.03274e-20	0	0.0249	0.0133	0.0133	TRUE	0.6934
MD00G1026000	50	51	63	212	254	221	75	99	100	46	40	53	196	206	212	77	91	119	96.41	46	205	96	4.181	2.064	7.157	8.22685e-13	6.6302e-12	0.0821	0.0248	0.0532	0.0532	TRUE	1.8398	1.799	0.847	3.375	0.000738107	0.0020358	0.0821	0.0248	0.0532	0.0532	TRUE	1.8398
MD00G1026100	134	152	170	264	298	253	66	83	71	123	119	144	245	242	243	67	76	84	137.02	129	243	76	1.766	0.82	4.285	1.83116e-05	5.92536e-05	0.0335	0.02	0.0278	0.0278	TRUE	0.9478	0.642	-0.639	-3.336	0.000848893	0.00231195	0.0335	0.02	0.0278	0.0278	TRUE	0.9478
MD00G1026200	71	86	83	26	33	30	8	14	10	65	67	70	24	27	29	8	13	12	31.02	67	27	11	0.419	-1.253	-5.291	1.21711e-07	5.37177e-07	0	0.059	0.0239	0.0239	TRUE	0.1005	0.169	-2.561	-8.022	1.0368e-15	1.27767e-14	0	0.059	0.0239	0.0239	TRUE	0.1005
MD00G1026300	0	0	0	0	0	0	0	0	0	0	0	0	0	0	0	0	0	0	0	0	0	0	1	0	NA	NA	NA	NA	NA	NA	NA	NA	NA	1	0	NA	NA	NA	NA	NA	NA	NA	NA	NA
MD00G1026400	0	0	0	0	0	0	0	0	0	0	0	0	0	0	0	0	0	0	0	0	0	0	1	0	NA	NA	NA	NA	NA	NA	NA	NA	NA	1	0	NA	NA	NA	NA	NA	NA	NA	NA	NA
MD00G1026500	23	38	24	62	64	53	26	25	23	21	30	20	57	52	51	27	23	27	30.16	24	53	26	2.031	1.022	4.204	2.62781e-05	8.27906e-05	0	0.0605	0.0287	0.0287	TRUE	0.2162	1.041	0.058	0.306	0.759431	0.820441	0	0.0605	0.0287	0.0287	TRUE	0.2162
MD00G1026600	1	2	1	4	1	2	0	2	0	1	2	1	4	1	2	0	2	0	1.27	1	2	1	1.183	0.242	0.726	0.468015	0.554992	0	1.2384	0.5673	0.5673	TRUE	0.3208	0.903	-0.147	-0.487	0.626555	0.709345	0	1.2384	0.5673	0.5673	TRUE	0.3208
MD00G1026700	8	10	18	22	34	30	22	33	23	7	8	15	20	28	29	22	30	27	26.48	10	26	26	2.166	1.115	3.677	0.000236455	0.000636406	0	0.0677	0.0356	0.0356	TRUE	0.3815	2.288	1.194	3.809	0.000139514	0.000443443	0	0.0677	0.0356	0.0356	TRUE	0.3815
MD00G1026800	2	1	2	0	1	0	0	2	3	2	1	2	0	1	0	0	2	4	6.26	2	0	2	0.636	-0.653	-1.506	0.132026	0.189721	0	0.2586	0.1577	0.1577	TRUE	0.3034	1.053	0.075	0.283	0.777439	0.834457	0	0.2586	0.1577	0.1577	TRUE	0.3034
MD00G1026900	1	0	1	0	0	0	1	2	2	1	0	1	0	0	0	1	2	2	4.76	1	0	2	0.748	-0.419	-1.075	0.282256	0.364211	0	0.3368	0.2377	0.2377	TRUE	0.1106	1.334	0.415	1.2	0.230168	0.319057	0	0.3368	0.2377	0.2377	TRUE	0.1106
MD00G1027000	113	112	103	211	287	205	86	92	70	104	88	87	196	233	197	88	84	83	119.01	93	209	85	2.117	1.082	5.323	1.02243e-07	4.55461e-07	0.0335	0.0218	0.0279	0.0279	TRUE	0.8442	0.938	-0.092	-0.547	0.584286	0.672283	0.0335	0.0218	0.0279	0.0279	TRUE	0.8442
MD00G1027100	111	103	92	259	305	298	132	137	95	102	81	78	240	247	286	135	126	113	133.59	87	258	125	2.889	1.53	8.44	3.16715e-17	3.74217e-16	0.0161	0.0203	0.0183	0.0183	TRUE	0.4139	1.349	0.432	2.68	0.00736787	0.016194	0.0161	0.0203	0.0183	0.0183	TRUE	0.4139
MD00G1027200	27	32	42	51	60	49	29	44	54	25	25	36	47	49	47	30	40	64	33.98	29	48	45	1.476	0.561	2.341	0.0192179	0.0348932	0.0418	0.0546	0.0479	0.0479	TRUE	0.1712	1.347	0.43	1.979	0.0478697	0.084429	0.0418	0.0546	0.0479	0.0479	TRUE	0.1712
MD00G1027300	2	4	6	3	4	1	3	3	4	2	3	5	3	3	1	3	3	5	2.65	3	2	4	0.888	-0.171	-0.559	0.57628	0.656348	0	0.5982	0.2943	0.2943	TRUE	0.335	1.009	0.013	0.05	0.959845	0.975754	0	0.5982	0.2943	0.2943	TRUE	0.335
MD00G1027600	91	120	154	30	65	36	3	13	7	84	94	131	28	53	35	3	12	8	38.07	103	39	8	0.419	-1.255	-4.349	1.3673e-05	4.51329e-05	0	0.0497	0.0606	0.0606	TRUE	0.2782	0.08	-3.643	-8.72	2.78749e-18	4.21173e-17	0	0.0497	0.0606	0.0606	TRUE	0.2782
MD00G1027700	220	230	234	125	123	104	49	60	46	203	180	198	116	100	100	50	55	55	92.98	194	105	53	0.563	-0.828	-5.606	2.07339e-08	1.01652e-07	0	0.0254	0.0113	0.0113	TRUE	0.361	0.281	-1.832	-10.367	3.50934e-25	8.23558e-24	0	0.0254	0.0113	0.0113	TRUE	0.361
MD00G1027800	187	192	213	49	45	60	22	24	17	172	151	181	45	36	58	22	22	20	68.39	168	46	21	0.284	-1.818	-9.15	5.68173e-20	8.31848e-19	0	0.0315	0.0175	0.0175	TRUE	0.1755	0.132	-2.927	-11.966	5.32734e-33	1.85834e-31	0	0.0315	0.0175	0.0175	TRUE	0.1755
MD00G1027900	67	65	80	80	118	89	40	47	39	62	51	68	74	96	85	41	43	46	47.42	60	85	43	1.346	0.429	2.364	0.0180948	0.0330488	0.0034	0.0416	0.0207	0.0207	TRUE	0.4812	0.781	-0.357	-2.003	0.0452054	0.0803062	0.0034	0.0416	0.0207	0.0207	TRUE	0.4812
MD00G1028000	68	72	88	42	83	49	37	35	30	63	56	75	39	67	47	38	32	36	37.71	65	51	35	0.838	-0.255	-1.25	0.211165	0.284334	0.0218	0.0501	0.0345	0.0345	TRUE	0.229	0.613	-0.705	-3.151	0.00162837	0.00416988	0.0218	0.0501	0.0345	0.0345	TRUE	0.229
MD00G1028200	14	18	13	19	17	27	11	13	8	13	14	11	18	14	26	11	12	10	14.64	13	19	11	1.274	0.349	1.301	0.193154	0.263266	0.0647	0.1154	0.0873	0.0873	TRUE	0.7854	0.934	-0.098	-0.442	0.658226	0.736365	0.0647	0.1154	0.0873	0.0873	TRUE	0.7854
MD00G1028300	11	9	6	2	4	2	3	2	0	10	7	5	2	3	2	3	2	0	2.85	7	2	2	0.591	-0.759	-1.884	0.0595816	0.0947664	0	0.5575	0.303	0.303	TRUE	0.1171	0.488	-1.035	-2.215	0.026775	0.0508681	0	0.5575	0.303	0.303	TRUE	0.1171
MD00G1028400	1871	2139	1849	1824	1913	1696	1391	1529	1121	1722	1678	1567	1690	1552	1629	1420	1402	1333	1516.26	1656	1624	1385	0.982	-0.027	-0.259	0.795821	0.845691	0.0075	0.0097	0.0081	0.0081	TRUE	0.1522	0.849	-0.236	-2.337	0.0194166	0.0383346	0.0075	0.0097	0.0081	0.0081	TRUE	0.1522
MD00G1028500	11	16	6	10	7	12	9	5	6	10	13	5	9	6	12	9	5	7	6.44	9	9	7	0.973	-0.04	-0.146	0.883939	0.917397	0	0.2513	0.1422	0.1422	TRUE	0.1703	0.89	-0.169	-0.7	0.483818	0.581687	0	0.2513	0.1422	0.1422	TRUE	0.1703
MD00G1028600	0	0	0	0	0	0	0	0	0	0	0	0	0	0	0	0	0	0	0	0	0	0	1	0	NA	NA	NA	NA	NA	NA	NA	NA	NA	1	0	NA	NA	NA	NA	NA	NA	NA	NA	NA
MD00G1028700	1340	1394	1727	1207	1518	1211	1180	1516	1320	1233	1094	1464	1119	1231	1163	1205	1390	1569	1126.29	1264	1171	1388	0.941	-0.088	-0.461	0.644497	0.717026	0.0617	0.01	0.04	0.04	TRUE	0.7868	1.07	0.097	0.57	0.568838	0.659125	0.0617	0.01	0.04	0.04	TRUE	0.7868
MD00G1028800	375	442	362	470	565	475	301	307	246	345	347	307	436	458	456	307	281	292	344.47	333	450	293	1.335	0.417	4.346	1.38715e-05	4.57434e-05	0	0.0132	0.005	0.005	TRUE	0.0497	0.891	-0.167	-1.722	0.0851243	0.138385	0	0.0132	0.005	0.005	TRUE	0.0497
MD00G1028900	618	661	787	621	767	655	442	525	368	569	519	667	575	622	629	451	481	437	427.22	585	609	456	1.039	0.055	0.501	0.616272	0.692151	0.0064	0.0123	0.0085	0.0085	TRUE	0.15	0.799	-0.323	-2.963	0.00304208	0.00733807	0.0064	0.0123	0.0085	0.0085	TRUE	0.15
MD00G1029000	0	0	0	0	0	0	0	0	0	0	0	0	0	0	0	0	0	0	0	0	0	0	1	0	NA	NA	NA	NA	NA	NA	NA	NA	NA	1	0	NA	NA	NA	NA	NA	NA	NA	NA	NA
MD00G1029100	545	639	601	260	254	232	710	915	621	502	501	509	241	206	223	725	839	738	727.68	504	223	767	0.449	-1.154	-10.004	1.466e-23	2.76236e-22	0.0057	0.0108	0.0071	0.0071	TRUE	0.0522	1.489	0.575	5.549	2.87889e-08	1.61677e-07	0.0057	0.0108	0.0071	0.0071	TRUE	0.0522
MD00G1029200	38	62	39	13	19	18	41	51	37	35	49	33	12	15	17	42	47	44	45.01	39	15	44	0.417	-1.261	-4.747	2.06499e-06	7.69651e-06	0	0.0434	0.0209	0.0209	TRUE	0.2026	1.092	0.127	0.732	0.464133	0.562919	0	0.0434	0.0209	0.0209	TRUE	0.2026
MD00G1029300	1320	1434	1420	1172	1525	1123	1214	1349	1074	1215	1125	1203	1086	1237	1079	1240	1237	1277	1320.51	1181	1134	1251	0.962	-0.056	-0.679	0.49705	0.583072	0.0028	0.0098	0.0044	0.0044	TRUE	0.0385	1.056	0.078	0.978	0.327887	0.426203	0.0028	0.0098	0.0044	0.0044	TRUE	0.0385
MD00G1029400	309	339	303	241	232	264	219	251	185	284	266	257	223	188	254	224	230	220	251.57	269	222	225	0.832	-0.265	-2.323	0.0201547	0.0364079	0.0027	0.0148	0.0071	0.0071	TRUE	0.1021	0.851	-0.233	-2.1	0.0357542	0.0654947	0.0027	0.0148	0.0071	0.0071	TRUE	0.1021
MD00G1029500	5	11	10	2	1	1	0	0	0	5	9	8	2	1	1	0	0	0	2.41	7	1	0	0.358	-1.481	-2.54	0.0110891	0.0213173	0	0.6561	0.3229	0.3229	TRUE	0.1446	0.051	-4.296	-3.794	0.000148444	0.000469824	0	0.6561	0.3229	0.3229	TRUE	0.1446
MD00G1030000	624	711	724	748	875	704	589	713	466	574	558	614	693	710	676	601	654	554	592.35	582	693	603	1.182	0.241	2.48	0.0131451	0.0248194	0.0035	0.0113	0.0061	0.0061	TRUE	0.0726	1.035	0.05	0.521	0.602347	0.688223	0.0035	0.0113	0.0061	0.0061	TRUE	0.0726
MD00G1030300	0	0	1	3	10	2	1	0	1	0	0	1	3	8	2	1	0	1	1.32	0	4	1	3.059	1.613	2.272	0.02307	0.0410596	0	1.191	0.9362	0.9362	TRUE	0.5181	1.157	0.21	0.632	0.527524	0.621843	0	1.191	0.9362	0.9362	TRUE	0.5181
MD00G1030400	111	137	134	144	170	101	145	154	107	102	107	114	133	138	97	148	141	127	121.79	108	123	139	1.123	0.167	1.058	0.290197	0.373024	0.0122	0.0215	0.016	0.016	TRUE	0.1819	1.233	0.302	2.024	0.0429258	0.0767945	0.0122	0.0215	0.016	0.016	TRUE	0.1819
MD00G1030500	397	471	407	394	454	368	265	296	248	365	369	345	365	368	354	271	271	295	325.28	360	362	279	1.007	0.009	0.104	0.917188	0.944518	0	0.0134	0.0039	0.0039	TRUE	0.0187	0.786	-0.348	-3.777	0.000158553	0.000499361	0	0.0134	0.0039	0.0039	TRUE	0.0187
MD00G1030600	227	304	287	285	311	254	310	317	255	209	238	243	264	252	244	317	291	303	242.51	230	253	304	1.094	0.129	1.209	0.226638	0.302308	0	0.0151	0.0056	0.0056	TRUE	0.043	1.288	0.365	3.507	0.000453091	0.00130661	0	0.0151	0.0056	0.0056	TRUE	0.043
MD00G1031100	1519	1673	1948	1185	1568	1200	863	1069	879	1398	1312	1651	1098	1272	1153	881	980	1045	1297.85	1454	1174	969	0.819	-0.288	-2.517	0.0118473	0.0226059	0.0099	0.0098	0.0101	0.0101	TRUE	0.0997	0.685	-0.545	-4.76	1.93619e-06	8.38178e-06	0.0099	0.0098	0.0101	0.0101	TRUE	0.0997
MD00G1031200	268	283	282	261	245	286	182	179	185	247	222	239	242	199	275	186	164	220	291.27	236	239	190	1.008	0.012	0.093	0.925633	0.951533	0.0078	0.014	0.0101	0.0101	TRUE	0.1235	0.824	-0.279	-2.233	0.0255597	0.0488055	0.0078	0.014	0.0101	0.0101	TRUE	0.1235
MD00G1031300	514	616	492	75	99	76	133	168	118	473	483	417	70	80	73	136	154	140	189.73	458	74	143	0.164	-2.609	-18.368	2.36939e-75	3.41137e-73	0	0.0169	0.0077	0.0077	TRUE	0.0538	0.317	-1.655	-12.825	1.18481e-37	5.1077e-36	0	0.0169	0.0077	0.0077	TRUE	0.0538
MD00G1031500	20	36	26	21	28	18	18	27	15	18	28	22	19	23	17	18	25	18	17.05	23	20	20	0.907	-0.141	-0.601	0.548116	0.630957	0	0.1003	0.0468	0.0468	TRUE	0.1704	0.935	-0.096	-0.476	0.633921	0.715788	0	0.1003	0.0468	0.0468	TRUE	0.1704
MD00G1031600	1272	1520	1524	2154	2387	2058	1702	2195	1536	1171	1192	1292	1996	1936	1977	1738	2012	1826	1618.92	1218	1970	1859	1.591	0.67	6.893	5.46606e-12	4.01555e-11	0.0056	0.0096	0.0067	0.0067	TRUE	0.0922	1.497	0.582	6.044	1.50309e-09	9.95562e-09	0.0056	0.0096	0.0067	0.0067	TRUE	0.0922
MD00G1031700	1463	1528	1653	1794	2172	1762	1480	1761	1219	1347	1199	1401	1663	1762	1693	1511	1614	1449	1444.19	1316	1706	1525	1.268	0.343	2.561	0.0104497	0.0202121	0.0175	0.0097	0.0149	0.0149	TRUE	0.3002	1.136	0.184	1.455	0.145579	0.217573	0.0175	0.0097	0.0149	0.0149	TRUE	0.3002
MD00G1031800	0	0	0	0	0	0	0	0	0	0	0	0	0	0	0	0	0	0	0	0	0	0	1	0	NA	NA	NA	NA	NA	NA	NA	NA	NA	1	0	NA	NA	NA	NA	NA	NA	NA	NA	NA
MD00G1031900	427	505	449	322	358	335	363	436	324	393	396	381	298	290	322	371	400	385	405.54	390	303	385	0.788	-0.343	-3.196	0.00139476	0.0032363	0.0043	0.0125	0.0067	0.0067	TRUE	0.1161	0.989	-0.016	-0.152	0.878885	0.914327	0.0043	0.0125	0.0067	0.0067	TRUE	0.1161
MD00G1032200	470	690	531	520	667	506	427	464	343	433	541	450	482	541	486	436	425	408	403.1	475	503	423	1.056	0.078	0.751	0.452811	0.54014	0.0046	0.0125	0.007	0.007	TRUE	0.0898	0.9	-0.152	-1.484	0.137868	0.207897	0.0046	0.0125	0.007	0.007	TRUE	0.0898
MD00G1032300	216	214	215	222	254	271	243	271	206	199	168	182	206	206	260	248	248	245	243.88	183	224	247	1.206	0.27	2.165	0.0304158	0.052456	0.0053	0.015	0.0088	0.0088	TRUE	0.1092	1.312	0.391	3.226	0.00125636	0.00329255	0.0053	0.015	0.0088	0.0088	TRUE	0.1092
MD00G1032400	359	358	326	457	788	484	696	964	526	330	281	276	424	639	465	711	884	625	442.48	296	509	740	1.647	0.72	4.541	5.58991e-06	1.95634e-05	0.0229	0.0122	0.0192	0.0192	TRUE	0.1628	2.443	1.288	7.69	1.47081e-14	1.64366e-13	0.0229	0.0122	0.0192	0.0192	TRUE	0.1628
MD00G1032500	412	535	411	549	660	548	436	477	333	379	420	348	509	535	526	445	437	396	469.92	382	523	426	1.337	0.419	3.248	0.00116328	0.00274514	0.0121	0.0119	0.012	0.012	TRUE	0.0934	1.099	0.136	1.11	0.267144	0.360582	0.0121	0.0119	0.012	0.012	TRUE	0.0934
MD00G1032600	1	1	1	1	1	1	1	1	1	1	1	1	1	1	1	1	1	1	1.02	1	1	1	1.012	0.017	0.054	0.957192	0.97545	0	1.544	0.5738	0.5738	TRUE	0.1591	1.04	0.056	0.194	0.846469	0.889551	0	1.544	0.5738	0.5738	TRUE	0.1591
MD00G1032700	371	442	416	606	592	533	557	610	429	342	347	353	562	480	512	569	559	510	622.46	347	518	546	1.456	0.542	4.455	8.40646e-06	2.86437e-05	0.0096	0.0111	0.01	0.01	TRUE	0.0355	1.526	0.61	5.037	4.72015e-07	2.24165e-06	0.0096	0.0111	0.01	0.01	TRUE	0.0355
MD00G1033000	35	47	38	36	45	31	45	53	37	32	37	32	33	36	30	46	49	44	36.75	34	33	46	0.988	-0.017	-0.088	0.92995	0.955075	0	0.0512	0.0191	0.0191	TRUE	0.0548	1.262	0.336	1.854	0.0636824	0.107814	0	0.0512	0.0191	0.0191	TRUE	0.0548
MD00G1033100	56	58	56	33	24	29	28	47	44	52	45	47	31	19	28	29	43	52	33.04	48	26	41	0.601	-0.733	-3.112	0.00185922	0.00421001	0	0.0559	0.0339	0.0339	TRUE	0.115	0.9	-0.151	-0.819	0.413028	0.513052	0	0.0559	0.0339	0.0339	TRUE	0.115
MD00G1033200	0	0	0	1	0	0	2	1	2	0	0	0	1	0	0	2	1	2	2.42	0	0	2	1.152	0.204	0.576	0.564487	0.645915	0	0.6543	0.3537	0.3537	TRUE	0.2255	2.877	1.525	2.298	0.0215581	0.0420605	0	0.6543	0.3537	0.3537	TRUE	0.2255
MD00G1033400	1029	1200	1118	797	966	735	956	1030	789	947	941	948	739	783	706	976	944	938	664.09	945	743	953	0.791	-0.338	-4.528	5.95986e-06	2.07782e-05	0	0.011	0.0032	0.0032	TRUE	0.2627	1.008	0.011	0.152	0.879512	0.914621	0	0.011	0.0032	0.0032	TRUE	0.2627
MD00G1033500	45	72	50	56	66	62	52	57	39	41	56	42	52	54	60	53	52	46	62.35	46	55	50	1.14	0.189	1.088	0.276739	0.358232	0	0.0337	0.0137	0.0137	TRUE	0.1477	1.059	0.083	0.518	0.604729	0.690267	0	0.0337	0.0137	0.0137	TRUE	0.1477
MD00G1033600	2303	2682	2475	3040	3628	2959	2204	2526	1788	2120	2104	2098	2817	2942	2842	2251	2316	2125	2332.81	2107	2867	2231	1.345	0.428	4.671	2.99159e-06	1.08974e-05	0.0052	0.0093	0.0062	0.0062	TRUE	0.1161	1.055	0.077	0.862	0.388588	0.488486	0.0052	0.0093	0.0062	0.0062	TRUE	0.1161
MD00G1033700	50	66	54	11	14	14	6	5	6	46	52	46	10	11	13	6	5	7	16.88	48	11	6	0.264	-1.919	-5.725	1.03586e-08	5.2683e-08	0	0.1012	0.0442	0.0442	TRUE	0.2113	0.131	-2.935	-6.848	7.48632e-12	6.41316e-11	0	0.1012	0.0442	0.0442	TRUE	0.2113
MD00G1033800	4	6	5	6	6	4	6	3	3	4	5	4	6	5	4	6	3	4	4.17	4	5	4	1.05	0.071	0.249	0.803495	0.851831	0	0.3833	0.1571	0.1571	TRUE	0.1665	0.993	-0.01	-0.043	0.966051	0.979979	0	0.3833	0.1571	0.1571	TRUE	0.1665
MD00G1033900	2	8	5	2	6	3	7	14	4	2	6	4	2	5	3	7	13	5	8.16	4	3	8	0.903	-0.148	-0.509	0.610619	0.687451	0	0.2002	0.1309	0.1309	TRUE	0.3602	1.374	0.458	1.575	0.115299	0.178907	0	0.2002	0.1309	0.1309	TRUE	0.3602
MD00G1034000	0	0	0	0	0	0	21	35	19	0	0	0	0	0	0	21	32	23	25.8	0	0	25	1	0	0	1	1	0	0.0692	0.044	0.044	TRUE	0.0583	98.401	6.621	6.052	1.43309e-09	9.52072e-09	0	0.0692	0.044	0.044	TRUE	0.0583
MD00G1034100	0	0	0	0	0	0	0	0	0	0	0	0	0	0	0	0	0	0	0	0	0	0	1	0	NA	NA	NA	NA	NA	NA	NA	NA	NA	1	0	NA	NA	NA	NA	NA	NA	NA	NA	NA
MD00G1034500	1327	1438	1358	1503	1721	1526	1502	1707	1352	1222	1128	1151	1393	1396	1466	1534	1565	1607	1610.2	1167	1418	1569	1.209	0.274	3.556	0.000376785	0.000976055	0.0023	0.0096	0.0038	0.0038	TRUE	0.0419	1.329	0.411	5.382	7.37972e-08	3.91228e-07	0.0023	0.0096	0.0038	0.0038	TRUE	0.0419
MD00G1034600	327	438	392	346	354	347	158	177	132	301	344	332	321	287	333	161	162	157	202.57	326	314	160	0.964	-0.053	-0.484	0.628649	0.70296	0.0016	0.0163	0.0073	0.0073	TRUE	0.528	0.501	-0.996	-8.005	1.19491e-15	1.46351e-14	0.0016	0.0163	0.0073	0.0073	TRUE	0.528
MD00G1034700	0	0	1	0	0	0	0	0	0	0	0	1	0	0	0	0	0	0	0.91	0	0	0	0.907	-0.142	-0.389	0.697421	0.762731	0	1.7327	1.7113	1.7113	TRUE	0.2117	0.934	-0.099	-0.297	0.766367	0.826187	0	1.7327	1.7113	1.7113	TRUE	0.2117
MD00G1034800	234	249	255	2	1	1	0	2	0	215	195	216	2	1	1	0	2	0	58.27	209	1	1	0.007	-7.154	-9.94	2.79469e-23	5.14383e-22	0	0.0355	0.0281	0.0281	TRUE	0.4855	0.005	-7.665	-7.922	2.33664e-15	2.79006e-14	0	0.0355	0.0281	0.0281	TRUE	0.4855
MD00G1034900	0	0	0	0	0	0	0	0	0	0	0	0	0	0	0	0	0	0	0	0	0	0	1	0	NA	NA	NA	NA	NA	NA	NA	NA	NA	1	0	NA	NA	NA	NA	NA	NA	NA	NA	NA
MD00G1035000	273	316	322	2	3	2	0	0	0	251	248	273	2	2	2	0	0	0	125.04	257	2	0	0.009	-6.784	-12.355	4.58299e-35	1.56645e-33	0	0.0211	0.0118	0.0118	TRUE	0.0751	0.001	-9.561	-8.769	1.79872e-18	2.76139e-17	0	0.0211	0.0118	0.0118	TRUE	0.0751
MD00G1035100	0	0	0	0	0	0	0	0	0	0	0	0	0	0	0	0	0	0	0	0	0	0	1	0	NA	NA	NA	NA	NA	NA	NA	NA	NA	1	0	NA	NA	NA	NA	NA	NA	NA	NA	NA
MD00G1035200	2	0	1	0	0	0	1	0	1	2	0	1	0	0	0	1	0	1	0.89	1	0	1	0.677	-0.563	-1.289	0.197564	0.268434	0	1.7579	1.0177	1.0177	TRUE	0.1254	0.964	-0.052	-0.171	0.863917	0.903077	0	1.7579	1.0177	1.0177	TRUE	0.1254
MD00G1035300	2	0	0	0	0	0	0	0	0	2	0	0	0	0	0	0	0	0	0.15	1	0	0	0.89	-0.168	-0.432	0.665895	NA	0	10.2002	12	12	TRUE	0.4871	0.907	-0.14	-0.384	0.700925	NA	0	10.2002	12	12	TRUE	0.4871
MD00G1035400	361	408	396	451	460	474	396	474	341	332	320	336	418	373	455	404	435	405	371.63	329	415	415	1.239	0.309	2.484	0.0130053	0.0245802	0.009	0.0128	0.0107	0.0107	TRUE	0.2062	1.228	0.296	2.465	0.0136855	0.0281176	0.009	0.0128	0.0107	0.0107	TRUE	0.2062
MD00G1035500	0	0	0	0	0	0	0	0	0	0	0	0	0	0	0	0	0	0	0	0	0	0	1	0	NA	NA	NA	NA	NA	NA	NA	NA	NA	1	0	NA	NA	NA	NA	NA	NA	NA	NA	NA
MD00G1035800	70	131	98	183	203	200	144	134	105	64	103	83	170	165	192	147	123	125	134.95	83	176	132	2.013	1.01	6.308	2.81939e-10	1.72071e-09	0.0072	0.0202	0.0128	0.0128	TRUE	0.2067	1.486	0.571	3.731	0.000190507	0.000589935	0.0072	0.0202	0.0128	0.0128	TRUE	0.2067
MD00G1035900	1381	1915	1185	1243	1331	1208	1478	1375	1040	1271	1502	1004	1152	1079	1160	1509	1261	1236	1475.77	1259	1130	1335	0.913	-0.131	-0.764	0.445056	0.532593	0.0375	0.0097	0.0292	0.0292	TRUE	0.073	1.046	0.065	0.415	0.678213	0.75339	0.0375	0.0097	0.0292	0.0292	TRUE	0.073
MD00G1036000	0	0	0	0	0	0	0	0	0	0	0	0	0	0	0	0	0	0	0	0	0	0	1	0	NA	NA	NA	NA	NA	NA	NA	NA	NA	1	0	NA	NA	NA	NA	NA	NA	NA	NA	NA
MD00G1036100	8	7	8	6	16	8	11	25	7	7	5	7	6	13	8	11	23	8	30.88	6	9	14	1.187	0.248	0.921	0.356993	0.443698	0.0451	0.0593	0.0539	0.0539	TRUE	0.3192	1.7	0.766	2.495	0.0126045	0.0261593	0.0451	0.0593	0.0539	0.0539	TRUE	0.3192
MD00G1036200	6	7	8	0	0	0	0	0	1	6	5	7	0	0	0	0	0	1	1.58	6	0	0	0.084	-3.567	-3.209	0.00133157	0.00310339	0	0.997	0.7972	0.7972	TRUE	0.2804	0.264	-1.922	-2.483	0.0130413	0.0269626	0	0.997	0.7972	0.7972	TRUE	0.2804
MD00G1036300	18	25	17	11	27	20	16	13	14	17	20	14	10	22	19	16	12	17	113.85	17	17	15	1.013	0.019	0.088	0.930064	0.955088	0	0.0224	0.0182	0.0182	TRUE	0.3181	0.923	-0.115	-0.584	0.559383	0.65092	0	0.0224	0.0182	0.0182	TRUE	0.3181
MD00G1036600	181	238	178	179	179	151	206	238	191	167	187	151	166	145	145	210	218	227	368.69	168	152	218	0.918	-0.123	-0.724	0.468763	0.555684	0.0293	0.0129	0.0237	0.0237	TRUE	0.0212	1.232	0.301	1.897	0.0578929	0.0994392	0.0293	0.0129	0.0237	0.0237	TRUE	0.0212
MD00G1036700	0	0	0	0	0	0	0	1	0	0	0	0	0	0	0	0	1	0	0.08	0	0	0	1	0	0	1	NA	0	20.4757	12	12	TRUE	0.1613	1.074	0.103	0.283	0.77683	NA	0	20.4757	12	12	TRUE	0.1613
MD00G1036800	32	38	36	82	73	75	96	123	65	29	30	31	76	59	72	98	113	77	162.1	30	69	96	2.181	1.125	5.642	1.68572e-08	8.35912e-08	0	0.0183	0.012	0.012	TRUE	0.1276	3.134	1.648	8.093	5.84512e-16	7.35373e-15	0	0.0183	0.012	0.012	TRUE	0.1276
MD00G1036900	0	0	0	94	83	74	79	98	115	0	0	0	87	67	71	81	90	137	83.91	0	75	103	274.461	8.1	7.436	1.03599e-13	9.10487e-13	0.0295	0.0273	0.0285	0.0285	TRUE	0.3957	370.773	8.534	7.806	5.88849e-15	6.80662e-14	0.0295	0.0273	0.0285	0.0285	TRUE	0.3957
MD00G1037000	411	489	438	439	403	396	346	400	342	378	384	371	407	327	380	353	367	407	334.43	378	371	376	0.983	-0.025	-0.227	0.820466	0.866253	0.0045	0.0133	0.0075	0.0075	TRUE	0.083	0.993	-0.009	-0.089	0.928964	0.952123	0.0045	0.0133	0.0075	0.0075	TRUE	0.083
MD00G1037100	18406	20811	19582	40967	45105	39218	30935	35458	24514	16943	16325	16596	37965	36582	37673	31590	32505	29140	22415.9	16621	37407	31078	2.238	1.162	16.619	5.07961e-62	4.91996e-60	0.0025	0.0087	0.0035	0.0035	TRUE	0.0399	1.857	0.893	12.814	1.36232e-37	5.85262e-36	0.0025	0.0087	0.0035	0.0035	TRUE	0.0399
MD00G1037200	130	163	129	43	33	39	20	30	39	120	128	109	40	27	37	20	28	46	58.69	119	35	31	0.304	-1.719	-7.1	1.25131e-12	9.86708e-12	0.021	0.0353	0.029	0.029	TRUE	0.5112	0.272	-1.88	-7.426	1.11842e-13	1.154e-12	0.021	0.0353	0.029	0.029	TRUE	0.5112
MD00G1037300	474	626	494	661	795	587	554	621	447	436	491	419	613	645	564	566	569	531	560.7	449	607	555	1.337	0.419	4.439	9.0566e-06	3.07298e-05	0.0029	0.0114	0.0053	0.0053	TRUE	0.041	1.22	0.287	3.091	0.00199379	0.00501473	0.0029	0.0114	0.0053	0.0053	TRUE	0.041
MD00G1037400	0	0	0	0	0	0	0	0	0	0	0	0	0	0	0	0	0	0	0	0	0	0	1	0	NA	NA	NA	NA	NA	NA	NA	NA	NA	1	0	NA	NA	NA	NA	NA	NA	NA	NA	NA
MD00G1037500	0	0	0	0	0	0	0	0	0	0	0	0	0	0	0	0	0	0	0	0	0	0	1	0	NA	NA	NA	NA	NA	NA	NA	NA	NA	1	0	NA	NA	NA	NA	NA	NA	NA	NA	NA
MD00G1037600	0	0	0	0	0	0	0	0	0	0	0	0	0	0	0	0	0	0	0	0	0	0	1	0	NA	NA	NA	NA	NA	NA	NA	NA	NA	1	0	NA	NA	NA	NA	NA	NA	NA	NA	NA
MD00G1037700	0	0	0	0	0	2	0	1	0	0	0	0	0	0	2	0	1	0	0.24	0	1	0	1.134	0.181	0.464	0.642331	NA	0	6.62	12	12	TRUE	0.4871	1.074	0.103	0.283	0.776833	NA	0	6.62	12	12	TRUE	0.4871
MD00G1038100	0	0	0	0	0	0	0	0	0	0	0	0	0	0	0	0	0	0	0	0	0	0	1	0	NA	NA	NA	NA	NA	NA	NA	NA	NA	1	0	NA	NA	NA	NA	NA	NA	NA	NA	NA
MD00G1038200	18	7	12	20	19	16	33	55	18	17	5	10	19	15	15	34	50	21	28.83	11	16	35	1.296	0.374	1.368	0.171442	0.237493	0.1058	0.0629	0.0864	0.0864	TRUE	0.1158	2.841	1.506	3.94	8.16136e-05	0.000269874	0.1058	0.0629	0.0864	0.0864	TRUE	0.1158
MD00G1038300	2	1	4	1	2	0	1	1	1	2	1	3	1	2	0	1	1	1	8.61	2	1	1	0.775	-0.367	-1.066	0.286281	0.368767	0	0.1901	0.1323	0.1323	TRUE	0.0748	0.838	-0.255	-0.871	0.383973	0.48394	0	0.1901	0.1323	0.1323	TRUE	0.0748
MD00G1038400	396	484	405	630	759	651	545	557	354	365	380	343	584	616	625	557	511	421	604.74	363	608	496	1.624	0.7	5.169	2.34887e-07	9.98625e-07	0.014	0.0112	0.0131	0.0131	TRUE	0.2349	1.321	0.402	3.111	0.00186168	0.00470881	0.014	0.0112	0.0131	0.0131	TRUE	0.2349
MD00G1038500	531	549	512	504	548	472	292	302	259	489	431	434	467	444	453	298	277	308	397.35	451	455	294	1.009	0.012	0.117	0.906803	0.935973	0.0043	0.0126	0.007	0.007	TRUE	0.1131	0.669	-0.581	-5.323	1.01838e-07	5.30309e-07	0.0043	0.0126	0.007	0.007	TRUE	0.1131
MD00G1038600	0	0	1	3	0	0	0	1	1	0	0	1	3	0	0	0	1	1	0.48	0	1	1	1.168	0.225	0.575	0.565147	NA	0	3.2813	4.0782	4.0782	TRUE	0.7213	1.11	0.15	0.421	0.673861	NA	0	3.2813	4.0782	4.0782	TRUE	0.7213
MD00G1038700	11	9	12	9	12	8	4	16	5	10	7	10	8	10	8	4	15	6	45.25	9	9	8	0.972	-0.041	-0.164	0.86965	0.905972	0	0.0432	0.0269	0.0269	TRUE	0.8077	0.97	-0.043	-0.204	0.838661	0.883587	0	0.0432	0.0269	0.0269	TRUE	0.8077
MD00G1038800	137	172	123	153	186	119	132	148	114	126	135	104	142	151	114	135	136	136	184.03	122	136	136	1.102	0.141	0.959	0.337809	0.423568	0.0104	0.0171	0.0129	0.0129	TRUE	0.1341	1.091	0.125	0.905	0.365317	0.465129	0.0104	0.0171	0.0129	0.0129	TRUE	0.1341
MD00G1038900	1169	1377	1277	1086	1384	1073	1114	1310	1102	1076	1080	1082	1006	1122	1031	1138	1201	1310	1048.77	1079	1053	1216	0.977	-0.034	-0.404	0.686222	0.753422	0.0027	0.0101	0.0046	0.0046	TRUE	0.0405	1.118	0.161	1.978	0.0479376	0.0845138	0.0027	0.0101	0.0046	0.0046	TRUE	0.0405
MD00G1039200	293	301	331	88	102	67	91	111	79	270	236	281	82	83	64	93	102	94	203.37	262	76	96	0.298	-1.747	-10.339	4.70832e-25	9.73785e-24	0.0125	0.0163	0.0138	0.0138	TRUE	0.1872	0.376	-1.411	-8.493	2.02207e-17	2.85186e-16	0.0125	0.0163	0.0138	0.0138	TRUE	0.1872
MD00G1039300	140	173	161	249	298	221	160	188	139	129	136	136	231	242	212	163	172	165	149.41	134	228	167	1.666	0.736	6.094	1.09889e-09	6.30616e-09	0	0.0191	0.0064	0.0064	TRUE	0.0367	1.219	0.286	2.417	0.0156343	0.0316249	0	0.0191	0.0064	0.0064	TRUE	0.0367
MD00G1039400	14	17	11	100	106	82	148	124	89	13	13	9	93	86	79	151	114	106	56.62	12	86	124	7.013	2.81	9.621	6.52259e-22	1.08487e-20	0	0.0362	0.0225	0.0225	TRUE	0.193	10.192	3.349	11.49	1.47294e-30	4.59247e-29	0	0.0362	0.0225	0.0225	TRUE	0.193
MD00G1039500	308	359	305	326	360	303	239	264	214	284	282	258	302	292	291	244	242	254	298.87	275	295	247	1.069	0.097	0.834	0.404033	0.492213	0.0053	0.0139	0.0081	0.0081	TRUE	0.1695	0.909	-0.137	-1.21	0.226247	0.314651	0.0053	0.0139	0.0081	0.0081	TRUE	0.1695
MD00G1039600	133	181	135	68	109	56	71	74	51	122	142	114	63	88	54	73	68	61	97.02	126	68	67	0.576	-0.797	-4.542	5.58039e-06	1.95356e-05	0.011	0.0247	0.017	0.017	TRUE	0.3179	0.563	-0.83	-4.627	3.70734e-06	1.53522e-05	0.011	0.0247	0.017	0.017	TRUE	0.3179
MD00G1039900	22	21	35	59	55	47	41	41	41	20	16	30	55	45	45	42	38	49	35.05	22	48	43	1.961	0.971	3.931	8.45601e-05	0.000245656	0	0.0532	0.0303	0.0303	TRUE	0.283	1.697	0.763	3.23	0.00123693	0.00324732	0	0.0532	0.0303	0.0303	TRUE	0.283
MD00G1040000	14491	16541	15242	21364	24253	20193	26181	28717	22443	13339	12976	12918	19798	19670	19398	26735	26326	26678	26451.9	13078	19622	26580	1.495	0.58	12.338	5.63513e-35	1.91553e-33	0.0006	0.0087	0.0016	0.0016	TRUE	0.0131	2.028	1.02	21.587	2.36454e-103	6.29812e-101	0.0006	0.0087	0.0016	0.0016	TRUE	0.0131
MD00G1040100	171	215	155	205	214	199	178	188	151	157	169	131	190	174	191	182	172	179	148.79	152	185	178	1.192	0.253	1.98	0.0476569	0.0779783	0	0.0191	0.0087	0.0087	TRUE	0.0804	1.142	0.192	1.556	0.119603	0.184535	0	0.0191	0.0087	0.0087	TRUE	0.0804
MD00G1040200	437	588	496	603	552	570	469	463	375	402	461	420	559	448	548	479	424	446	424.9	428	518	450	1.192	0.254	2.079	0.0376425	0.0634977	0.0098	0.0123	0.0106	0.0106	TRUE	0.1468	1.044	0.062	0.529	0.597086	0.683678	0.0098	0.0123	0.0106	0.0106	TRUE	0.1468
MD00G1040300	0	0	0	9	5	2	15	13	11	0	0	0	8	4	2	15	12	13	4.55	0	5	13	15.26	3.932	3.616	0.000299209	0.000790473	0	0.3521	0.2477	0.2477	TRUE	0.2409	48.789	5.608	4.81	1.51077e-06	6.65837e-06	0	0.3521	0.2477	0.2477	TRUE	0.2409
MD00G1040400	0	0	0	0	0	0	0	0	0	0	0	0	0	0	0	0	0	0	0	0	0	0	1	0	NA	NA	NA	NA	NA	NA	NA	NA	NA	1	0	NA	NA	NA	NA	NA	NA	NA	NA	NA
MD00G1040500	1505	1557	1816	2929	3712	2670	2205	3015	1982	1385	1221	1539	2714	3011	2565	2252	2764	2356	2098.62	1382	2763	2457	1.917	0.938	5.716	1.09282e-08	5.54061e-08	0.0292	0.0094	0.0216	0.0216	TRUE	0.5214	1.693	0.76	4.743	2.10859e-06	9.0796e-06	0.0292	0.0094	0.0216	0.0216	TRUE	0.5214
MD00G1040600	95	134	107	92	94	90	72	95	78	87	105	91	85	76	86	74	87	93	93.61	94	82	85	0.886	-0.174	-1.145	0.252363	0.331407	0	0.0253	0.0116	0.0116	TRUE	0.0701	0.91	-0.136	-0.95	0.341979	0.440772	0	0.0253	0.0116	0.0116	TRUE	0.0701
MD00G1040900	5162	5625	5358	4810	5861	4626	3840	4501	3121	4752	4413	4541	4458	4753	4444	3921	4126	3710	4206.88	4569	4552	3919	0.997	-0.005	-0.056	0.955293	0.973994	0.0048	0.009	0.0058	0.0058	TRUE	0.0784	0.866	-0.207	-2.412	0.0158715	0.0320507	0.0048	0.009	0.0058	0.0058	TRUE	0.0784
MD00G1041000	0	0	0	0	0	0	0	0	0	0	0	0	0	0	0	0	0	0	0.08	0	0	0	1	0	0	1	NA	0	20.6719	12	12	TRUE	0.1097	1	0	0	1	NA	0	20.6719	12	12	TRUE	0.1097
MD00G1041100	110	124	103	106	100	95	98	118	107	101	97	87	98	81	91	100	108	127	94.67	95	90	112	0.951	-0.072	-0.484	0.6284	0.702745	0	0.0251	0.0109	0.0109	TRUE	0.0655	1.139	0.188	1.357	0.174838	0.25408	0	0.0251	0.0109	0.0109	TRUE	0.0655
MD00G1041200	179	259	210	149	145	120	174	192	168	165	203	178	138	118	115	178	176	200	187.33	182	124	185	0.698	-0.52	-3.906	9.38455e-05	0.000270462	0.0042	0.017	0.0089	0.0089	TRUE	0.0602	1.008	0.012	0.097	0.922582	0.947169	0.0042	0.017	0.0089	0.0089	TRUE	0.0602
MD00G1041300	450	490	505	432	531	428	418	434	287	414	384	428	400	431	411	427	398	341	333.94	409	414	389	1.013	0.019	0.186	0.852639	0.892463	0	0.0133	0.0059	0.0059	TRUE	0.0615	0.957	-0.064	-0.648	0.517221	0.612349	0	0.0133	0.0059	0.0059	TRUE	0.0615
MD00G1041400	521	640	632	543	709	613	369	416	329	480	502	536	503	575	589	377	381	391	441.91	506	556	383	1.094	0.129	1.297	0.194646	0.264991	0.0035	0.0122	0.0062	0.0062	TRUE	0.075	0.772	-0.373	-3.712	0.00020525	0.000631292	0.0035	0.0122	0.0062	0.0062	TRUE	0.075
MD00G1041800	0	0	0	11	11	12	0	0	0	0	0	0	10	9	12	0	0	0	2.55	0	10	0	31.87	4.994	4.078	4.55173e-05	0.000138152	0	0.6209	0.532	0.532	TRUE	0.0441	1	0	0	1	1	0	0.6209	0.532	0.532	TRUE	0.0441
MD00G1041900	1018	1148	1148	1395	1652	1374	984	1122	809	937	901	973	1293	1340	1320	1005	1029	962	1006.27	937	1318	999	1.389	0.474	5.151	2.59142e-07	1.09637e-06	0.0042	0.0102	0.0058	0.0058	TRUE	0.1022	1.061	0.086	0.956	0.339199	0.437824	0.0042	0.0102	0.0058	0.0058	TRUE	0.1022
MD00G1042000	0	0	0	1	0	0	31	30	35	0	0	0	1	0	0	32	28	42	8.67	0	0	34	1.159	0.213	0.606	0.544324	0.627522	0	0.1889	0.1258	0.1258	TRUE	0.2055	122.393	6.935	6.153	7.59897e-10	5.21276e-09	0	0.1889	0.1258	0.1258	TRUE	0.2055
MD00G1043300	883	1062	1056	1097	1218	1004	788	905	583	813	833	895	1017	988	964	805	830	693	786.26	847	990	776	1.159	0.213	2.105	0.0352687	0.0598758	0.0059	0.0106	0.0072	0.0072	TRUE	0.1084	0.924	-0.114	-1.157	0.247379	0.338648	0.0059	0.0106	0.0072	0.0072	TRUE	0.1084
MD00G1043400	1	1	2	1	1	1	3	2	3	1	1	2	1	1	1	3	2	4	1.67	1	1	3	0.945	-0.082	-0.258	0.796426	0.846258	0	0.9456	0.3485	0.3485	TRUE	0.097	1.293	0.37	1.156	0.24755	0.338777	0	0.9456	0.3485	0.3485	TRUE	0.097
MD00G1043500	2	0	2	1	2	4	4	4	2	2	0	2	1	2	4	4	4	2	1.9	1	2	3	1.184	0.244	0.741	0.458892	0.546084	0	0.8317	0.4295	0.4295	TRUE	0.2864	1.389	0.474	1.364	0.172557	0.251265	0	0.8317	0.4295	0.4295	TRUE	0.2864
MD00G1043700	624	770	643	631	777	606	477	512	377	574	604	545	585	630	582	487	469	448	495.59	574	599	468	1.041	0.058	0.642	0.520968	0.605973	0.0019	0.0118	0.005	0.005	TRUE	0.0724	0.826	-0.275	-3.024	0.00249807	0.00615181	0.0019	0.0118	0.005	0.005	TRUE	0.0724
MD00G1043800	60	63	66	57	61	44	24	32	23	55	49	56	53	49	42	25	29	27	33.38	53	48	27	0.92	-0.12	-0.636	0.524554	0.609194	0	0.0555	0.0218	0.0218	TRUE	0.0451	0.558	-0.841	-3.764	0.000167171	0.00052407	0	0.0555	0.0218	0.0218	TRUE	0.0451
MD00G1043900	0	0	0	0	0	0	0	0	0	0	0	0	0	0	0	0	0	0	0	0	0	0	1	0	NA	NA	NA	NA	NA	NA	NA	NA	NA	1	0	NA	NA	NA	NA	NA	NA	NA	NA	NA
MD00G1044000	0	0	0	0	0	0	0	0	0	0	0	0	0	0	0	0	0	0	0	0	0	0	1	0	NA	NA	NA	NA	NA	NA	NA	NA	NA	1	0	NA	NA	NA	NA	NA	NA	NA	NA	NA
MD00G1044100	0	0	0	0	0	0	0	0	0	0	0	0	0	0	0	0	0	0	0	0	0	0	1	0	NA	NA	NA	NA	NA	NA	NA	NA	NA	1	0	NA	NA	NA	NA	NA	NA	NA	NA	NA
MD00G1044200	1	0	1	0	0	0	0	0	0	1	0	1	0	0	0	0	0	0	0.15	1	0	0	0.893	-0.163	-0.419	0.674941	NA	0	10.621	12	12	TRUE	0.1385	0.91	-0.136	-0.372	0.710112	NA	0	10.621	12	12	TRUE	0.1385
MD00G1044300	0	0	0	1	0	0	0	1	0	0	0	0	1	0	0	0	1	0	0.15	0	0	0	1.065	0.09	0.236	0.813239	NA	0	10.1867	12	12	TRUE	0.2275	1.074	0.103	0.283	0.776832	NA	0	10.1867	12	12	TRUE	0.2275
MD00G1044400	0	0	0	0	0	0	0	0	0	0	0	0	0	0	0	0	0	0	0	0	0	0	1	0	NA	NA	NA	NA	NA	NA	NA	NA	NA	1	0	NA	NA	NA	NA	NA	NA	NA	NA	NA
MD00G1044500	227	279	238	161	149	134	230	214	208	209	219	202	149	121	129	235	196	247	333.09	210	133	226	0.653	-0.615	-4.517	6.25973e-06	2.17504e-05	0.0084	0.0133	0.01	0.01	TRUE	0.0493	1.064	0.089	0.728	0.466333	0.564853	0.0084	0.0133	0.01	0.01	TRUE	0.0493
MD00G1044800	0	0	0	3	1	1	0	0	0	0	0	0	3	1	1	0	0	0	0.45	0	2	0	1.516	0.6	1.271	0.203883	NA	0	3.4451	3.4973	3.4973	TRUE	0.1994	1	0	0	1	NA	0	3.4451	3.4973	3.4973	TRUE	0.1994
MD00G1044900	0	0	0	0	0	0	0	0	0	0	0	0	0	0	0	0	0	0	0.12	0	0	0	1	0	0	1	NA	0	12.7934	12	12	TRUE	0.32	1	0	0	1	NA	0	12.7934	12	12	TRUE	0.32
MD00G1045000	0	2	0	1	1	1	2	1	1	0	2	0	1	1	1	2	1	1	1.05	1	1	1	1.104	0.143	0.422	0.673334	0.742551	0	1.4969	0.7305	0.7305	TRUE	0.21	1.205	0.269	0.82	0.412115	0.512156	0	1.4969	0.7305	0.7305	TRUE	0.21
MD00G1045100	0	0	0	0	0	0	0	0	0	0	0	0	0	0	0	0	0	0	0	0	0	0	1	0	NA	NA	NA	NA	NA	NA	NA	NA	NA	1	0	NA	NA	NA	NA	NA	NA	NA	NA	NA
MD00G1045200	206	208	200	192	200	151	152	172	157	190	163	170	178	162	145	155	158	187	185.41	174	162	167	0.937	-0.094	-0.687	0.492117	0.57835	0.0078	0.0171	0.0113	0.0113	TRUE	0.121	0.962	-0.056	-0.437	0.662457	0.740121	0.0078	0.0171	0.0113	0.0113	TRUE	0.121
MD00G1045300	1231	1406	1301	785	1054	767	717	874	597	1133	1103	1103	727	855	737	732	801	710	963.61	1113	773	748	0.703	-0.508	-5.944	2.77599e-09	1.51362e-08	0.0027	0.0102	0.0046	0.0046	TRUE	0.0521	0.683	-0.55	-6.423	1.33884e-10	1.00212e-09	0.0027	0.0102	0.0046	0.0046	TRUE	0.0521
MD00G1045400	0	0	0	2	4	2	2	3	0	0	0	0	2	3	2	2	3	0	2.53	0	2	2	4.791	2.26	2.718	0.00657677	0.0133092	0	0.6259	0.3102	0.3102	TRUE	0.2087	2.821	1.496	2.286	0.0222459	0.0432484	0	0.6259	0.3102	0.3102	TRUE	0.2087
MD00G1045500	0	1	0	3	2	0	0	4	3	0	1	0	3	2	0	0	4	4	1.03	0	2	3	1.383	0.468	1.113	0.265836	0.346403	0	1.5194	1.7124	1.7124	TRUE	0.1122	1.604	0.682	1.481	0.138705	0.208957	0	1.5194	1.7124	1.7124	TRUE	0.1122
MD00G1045600	0	0	1	0	0	0	0	0	0	0	0	1	0	0	0	0	0	0	0.07	0	0	0	0.948	-0.076	-0.2	0.841337	NA	0	22.1474	12	12	TRUE	0.2117	0.963	-0.055	-0.153	0.878411	NA	0	22.1474	12	12	TRUE	0.2117
MD00G1045700	3	11	5	4	5	5	10	9	2	3	9	4	4	4	5	10	8	2	10.87	5	4	7	0.897	-0.156	-0.553	0.580067	0.659694	0	0.1524	0.0929	0.0929	TRUE	0.4319	1.128	0.173	0.724	0.469018	0.567441	0	0.1524	0.0929	0.0929	TRUE	0.4319
MD00G1045800	3	0	0	0	2	0	1	4	1	3	0	0	0	2	0	1	4	1	1.13	1	1	2	0.921	-0.118	-0.342	0.732128	0.791909	0	1.3939	1.2225	1.2225	TRUE	0.7221	1.17	0.227	0.705	0.480687	0.578694	0	1.3939	1.2225	1.2225	TRUE	0.7221
MD00G1045900	0	0	0	0	0	0	0	0	0	0	0	0	0	0	0	0	0	0	0	0	0	0	1	0	NA	NA	NA	NA	NA	NA	NA	NA	NA	1	0	NA	NA	NA	NA	NA	NA	NA	NA	NA
MD00G1046000	0	0	0	0	0	0	0	0	0	0	0	0	0	0	0	0	0	0	0	0	0	0	1	0	NA	NA	NA	NA	NA	NA	NA	NA	NA	1	0	NA	NA	NA	NA	NA	NA	NA	NA	NA
MD00G1046200	0	0	0	12	23	14	15	17	12	0	0	0	11	19	13	15	16	14	34.56	0	14	15	58.209	5.863	5.397	6.77763e-08	3.10565e-07	0	0.0539	0.0279	0.0279	TRUE	0.1793	60.109	5.91	5.432	5.56163e-08	2.99571e-07	0	0.0539	0.0279	0.0279	TRUE	0.1793
MD00G1046300	22	17	17	8	7	9	9	5	6	20	13	14	7	6	9	9	5	7	15.54	16	7	7	0.595	-0.75	-2.322	0.0202574	0.0365704	0	0.1092	0.0868	0.0868	TRUE	0.0326	0.594	-0.751	-2.357	0.0184114	0.0365972	0	0.1092	0.0868	0.0868	TRUE	0.0326
MD00G1046400	11	11	12	9	10	13	3	11	12	10	9	10	8	8	12	3	10	14	15.58	10	9	9	0.998	-0.002	-0.009	0.992805	1	0.0516	0.109	0.0818	0.0818	TRUE	0.1303	0.971	-0.042	-0.189	0.850481	0.892309	0.0516	0.109	0.0818	0.0818	TRUE	0.1303
MD00G1046500	108	113	113	141	158	134	137	124	128	99	89	96	131	128	129	140	114	152	154.78	95	129	135	1.33	0.412	2.977	0.00291043	0.00634085	0	0.0187	0.0086	0.0086	TRUE	0.1075	1.366	0.45	3.323	0.000891593	0.00241765	0	0.0187	0.0086	0.0086	TRUE	0.1075
MD00G1046600	48	50	48	1	3	1	0	5	4	44	39	41	1	2	1	0	5	5	12.07	41	1	3	0.042	-4.579	-6.41	1.4581e-10	9.16597e-10	0	0.1382	0.0922	0.0922	TRUE	0.5157	0.083	-3.59	-6.117	9.53108e-10	6.46795e-09	0	0.1382	0.0922	0.0922	TRUE	0.5157
MD00G1046700	51	49	67	185	243	170	134	148	160	47	38	57	171	197	163	137	136	190	261.42	47	177	154	3.583	1.841	7.401	1.35245e-13	1.17177e-12	0.0501	0.0146	0.0363	0.0363	TRUE	0.2085	3.098	1.631	6.545	5.94946e-11	4.6191e-10	0.0501	0.0146	0.0363	0.0363	TRUE	0.2085
MD00G1046800	4	8	3	3	1	3	2	1	1	4	6	3	3	1	3	2	1	1	3.8	4	2	1	0.774	-0.369	-1.122	0.261817	0.341883	0	0.4201	0.247	0.247	TRUE	0.3324	0.67	-0.578	-1.605	0.108478	0.16993	0	0.4201	0.247	0.247	TRUE	0.3324
MD00G1047000	3	2	3	19	19	9	5	12	5	3	2	3	18	15	9	5	11	6	6.49	3	14	7	4.555	2.188	3.744	0.000181214	0.000496799	0	0.2495	0.1334	0.1334	TRUE	0.237	1.939	0.956	2.334	0.0196067	0.0386781	0	0.2495	0.1334	0.1334	TRUE	0.237
MD00G1047100	17	20	36	78	106	79	88	111	88	16	16	31	72	86	76	90	102	105	69.25	21	78	99	3.595	1.846	6.92	4.5148e-12	3.34905e-11	0.0273	0.0312	0.0293	0.0293	TRUE	0.2181	4.597	2.201	8.167	3.15439e-16	4.06593e-15	0.0273	0.0312	0.0293	0.0293	TRUE	0.2181
MD00G1047200	14	23	13	11	11	11	7	6	10	13	18	11	10	9	11	7	6	12	13.5	14	10	8	0.805	-0.313	-1.198	0.231021	0.307242	0	0.1245	0.0555	0.0555	TRUE	0.1961	0.726	-0.462	-1.786	0.0740431	0.122752	0	0.1245	0.0555	0.0555	TRUE	0.1961
MD00G1047300	1	1	0	14	20	17	9	12	8	1	1	0	13	16	16	9	11	10	17.75	1	15	10	18.746	4.229	4.377	1.20379e-05	4.00941e-05	0	0.0967	0.0689	0.0689	TRUE	0.0865	11.196	3.485	3.763	0.000168001	0.000526406	0	0.0967	0.0689	0.0689	TRUE	0.0865
MD00G1047400	216	256	252	221	334	229	48	64	47	199	201	214	205	271	220	49	59	56	258.13	205	232	55	1.115	0.157	0.937	0.348888	0.435249	0.0285	0.0147	0.0236	0.0236	TRUE	0.3474	0.275	-1.861	-8.619	6.73621e-18	9.89339e-17	0.0285	0.0147	0.0236	0.0236	TRUE	0.3474
MD00G1047500	16	29	34	85	103	82	73	72	73	15	23	29	79	84	79	75	66	87	66.7	22	81	76	3.465	1.793	7.534	4.91266e-14	4.46268e-13	0.0061	0.0321	0.019	0.019	TRUE	0.236	3.247	1.699	7.052	1.76393e-12	1.6051e-11	0.0061	0.0321	0.019	0.019	TRUE	0.236
MD00G1047600	10	8	10	33	46	38	31	30	29	9	6	8	31	37	37	32	28	34	24.35	8	35	31	3.741	1.904	4.457	8.30234e-06	2.83122e-05	0.1202	0.0728	0.0985	0.0985	TRUE	2.1594	3.302	1.723	4.074	4.62909e-05	0.000159862	0.1202	0.0728	0.0985	0.0985	TRUE	2.1594
MD00G1047900	138	144	154	19	29	31	23	33	13	127	113	131	18	24	30	23	30	15	61.3	124	24	23	0.198	-2.337	-9.048	1.45013e-19	2.06394e-18	0.0199	0.0341	0.0277	0.0277	TRUE	0.2375	0.197	-2.345	-8.815	1.19606e-18	1.85993e-17	0.0199	0.0341	0.0277	0.0277	TRUE	0.2375
MD00G1048000	0	0	0	1	3	1	2	0	2	0	0	0	1	2	1	2	0	2	0.73	0	1	1	1.707	0.772	1.526	0.127057	0.183599	0	2.1554	1.8946	1.8946	TRUE	0.2974	1.647	0.72	1.511	0.130725	0.198807	0	2.1554	1.8946	1.8946	TRUE	0.2974
MD00G1048100	19	23	19	10	11	9	23	19	14	17	18	16	9	9	9	23	17	17	20.31	17	9	19	0.625	-0.677	-2.432	0.0150055	0.0279373	0	0.0856	0.034	0.034	TRUE	0.1008	1.066	0.092	0.46	0.645389	0.72577	0	0.0856	0.034	0.034	TRUE	0.1008
MD00G1048200	80	95	108	4	3	8	55	38	32	74	75	92	4	2	8	56	35	38	44.78	80	5	43	0.059	-4.087	-9.712	2.68216e-22	4.58167e-21	0.0087	0.0435	0.0268	0.0268	TRUE	0.331	0.591	-0.759	-3.612	0.000303948	0.000906231	0.0087	0.0435	0.0268	0.0268	TRUE	0.331
MD00G1048300	2	4	2	3	3	4	4	7	4	2	3	2	3	2	4	4	6	5	38.7	2	3	5	1.12	0.164	0.562	0.573828	0.654234	0	0.049	0.0349	0.0349	TRUE	0.0379	1.475	0.56	1.775	0.0759215	0.125437	0	0.049	0.0349	0.0349	TRUE	0.0379
MD00G1048400	30	43	32	212	339	237	208	210	145	28	34	27	196	275	228	212	193	172	157.84	30	233	192	7.784	2.96	14.68	8.69993e-49	5.46162e-47	0	0.0185	0.0134	0.0134	TRUE	0.0806	6.409	2.68	13.148	1.75644e-39	8.19744e-38	0	0.0185	0.0134	0.0134	TRUE	0.0806
MD00G1048600	1	1	1	0	0	0	0	0	0	1	1	1	0	0	0	0	0	0	0.21	1	0	0	0.843	-0.246	-0.611	0.541058	NA	0	7.3595	9.296	9.296	TRUE	0.0449	0.865	-0.21	-0.557	0.577211	NA	0	7.3595	9.296	9.296	TRUE	0.0449
MD00G1048700	0	0	0	0	0	0	0	0	0	0	0	0	0	0	0	0	0	0	0	0	0	0	1	0	NA	NA	NA	NA	NA	NA	NA	NA	NA	1	0	NA	NA	NA	NA	NA	NA	NA	NA	NA
MD00G1048800	71	47	73	57	63	45	47	68	45	65	37	62	53	51	43	48	62	53	44.96	55	49	54	0.925	-0.113	-0.542	0.587752	0.667012	0.0338	0.0434	0.0382	0.0382	TRUE	0.3769	1.003	0.004	0.022	0.98205	0.991785	0.0338	0.0434	0.0382	0.0382	TRUE	0.3769
MD00G1048900	97	146	101	0	0	0	0	0	0	89	115	86	0	0	0	0	0	0	30.04	97	0	0	0.003	-8.364	-7.638	2.19981e-14	2.05849e-13	0	0.0607	0.0395	0.0395	TRUE	0.1383	0.003	-8.179	-7.466	8.29674e-14	8.6614e-13	0	0.0607	0.0395	0.0395	TRUE	0.1383
MD00G1049000	553	672	540	706	759	725	772	857	652	509	527	458	654	616	696	788	786	775	1039.05	498	655	783	1.288	0.366	2.855	0.00430573	0.00906149	0.0132	0.0101	0.0123	0.0123	TRUE	0.0219	1.518	0.602	4.713	2.43663e-06	1.03923e-05	0.0132	0.0101	0.0123	0.0123	TRUE	0.0219
MD00G1049100	74	104	71	131	202	146	140	134	105	68	82	60	121	164	140	143	123	125	91.13	70	142	130	1.93	0.949	5.393	6.92126e-08	3.16757e-07	0	0.0258	0.0165	0.0165	TRUE	0.115	1.757	0.813	4.652	3.28193e-06	1.37124e-05	0	0.0258	0.0165	0.0165	TRUE	0.115
MD00G1049200	4	0	0	1	0	0	2	0	0	4	0	0	1	0	0	2	0	0	0.68	1	0	1	0.819	-0.288	-0.721	0.470652	NA	8.0852	2.3197	3.7235	3.7235	TRUE	0.95	0.927	-0.11	-0.318	0.750233	NA	8.0852	2.3197	3.7235	3.7235	TRUE	0.95
MD00G1049400	0	0	0	0	0	0	0	0	0	0	0	0	0	0	0	0	0	0	0	0	0	0	1	0	NA	NA	NA	NA	NA	NA	NA	NA	NA	1	0	NA	NA	NA	NA	NA	NA	NA	NA	NA
MD00G1049500	0	0	0	0	0	0	0	0	0	0	0	0	0	0	0	0	0	0	0	0	0	0	1	0	NA	NA	NA	NA	NA	NA	NA	NA	NA	1	0	NA	NA	NA	NA	NA	NA	NA	NA	NA
MD00G1049600	1	1	1	6	0	3	0	3	1	1	1	1	6	0	3	0	3	1	1.56	1	3	1	1.376	0.46	1.19	0.233903	0.310566	0	1.0079	0.8276	0.8276	TRUE	0.0456	1.093	0.128	0.428	0.66887	0.745566	0	1.0079	0.8276	0.8276	TRUE	0.0456
MD00G1049700	0	0	0	32	45	35	10	3	2	0	0	0	30	36	34	10	3	2	10	0	33	5	121.368	6.923	6.149	7.78936e-10	4.53144e-09	0	0.1649	0.127	0.127	TRUE	0.6925	18.46	4.206	3.863	0.000112008	0.000361752	0	0.1649	0.127	0.127	TRUE	0.6925
MD00G1049800	2	3	6	126	169	130	136	150	112	2	2	5	117	137	125	139	138	133	74.45	3	126	137	38.267	5.258	11.638	2.64282e-31	7.52297e-30	0	0.0296	0.0122	0.0122	TRUE	0.2432	41.261	5.367	11.871	1.67003e-32	5.66654e-31	0	0.0296	0.0122	0.0122	TRUE	0.2432
MD00G1050100	889	1011	910	326	397	384	483	543	443	818	793	771	302	322	369	493	498	527	672.66	794	331	506	0.42	-1.252	-14.005	1.44547e-44	7.62397e-43	0.0009	0.0109	0.004	0.004	TRUE	0.0553	0.646	-0.631	-7.434	1.04966e-13	1.08577e-12	0.0009	0.0109	0.004	0.004	TRUE	0.0553
MD00G1050200	384	413	558	209	246	197	183	243	204	353	324	473	194	200	189	187	223	242	200.6	383	194	217	0.527	-0.924	-5.853	4.82323e-09	2.54973e-08	0	0.0164	0.0168	0.0168	TRUE	0.2424	0.593	-0.755	-4.883	1.04264e-06	4.70133e-06	0	0.0164	0.0168	0.0168	TRUE	0.2424
MD00G1050300	105	96	118	25	25	20	21	20	18	97	75	100	23	20	19	21	18	21	33.21	91	21	20	0.241	-2.05	-7.73	1.077e-14	1.03589e-13	0	0.0557	0.0278	0.0278	TRUE	0.2701	0.235	-2.091	-7.599	2.97406e-14	3.24561e-13	0	0.0557	0.0278	0.0278	TRUE	0.2701
MD00G1050400	163	147	173	8	10	14	12	11	8	150	115	147	7	8	13	12	10	10	39.84	137	9	11	0.072	-3.801	-11.497	1.37274e-30	3.76669e-29	0	0.0479	0.0305	0.0305	TRUE	0.1975	0.08	-3.646	-10.921	9.13537e-28	2.48474e-26	0	0.0479	0.0305	0.0305	TRUE	0.1975
MD00G1050500	410	490	432	205	223	177	166	161	140	377	384	366	190	181	170	170	148	166	264.96	376	180	161	0.493	-1.019	-7.175	7.24772e-13	5.8741e-12	0.0109	0.0145	0.0121	0.0121	TRUE	0.258	0.437	-1.194	-8.1	5.49627e-16	6.93121e-15	0.0109	0.0145	0.0121	0.0121	TRUE	0.258
MD00G1050600	476	576	518	758	780	693	584	591	520	438	452	439	702	633	666	596	542	618	569.55	443	667	585	1.467	0.553	4.44	8.99029e-06	3.05215e-05	0.0109	0.0114	0.0111	0.0111	TRUE	0.1128	1.282	0.359	2.993	0.0027593	0.00672425	0.0109	0.0114	0.0111	0.0111	TRUE	0.1128
MD00G1050700	1353	1452	1474	1594	1829	1531	982	1177	775	1245	1139	1249	1477	1483	1471	1003	1079	921	1171.52	1211	1477	1001	1.2	0.263	2.036	0.0417296	0.0694407	0.016	0.01	0.0136	0.0136	TRUE	0.3628	0.847	-0.239	-1.934	0.0530832	0.0922831	0.016	0.01	0.0136	0.0136	TRUE	0.3628
MD00G1050800	0	0	0	0	0	0	0	0	0	0	0	0	0	0	0	0	0	0	0	0	0	0	1	0	NA	NA	NA	NA	NA	NA	NA	NA	NA	1	0	NA	NA	NA	NA	NA	NA	NA	NA	NA
MD00G1051000	0	0	0	0	2	1	0	0	0	0	0	0	0	2	1	0	0	0	0.22	0	1	0	1.169	0.225	0.57	0.568979	NA	0	7.2735	12	12	TRUE	0.0119	1	0	0	1	NA	0	7.2735	12	12	TRUE	0.0119
MD00G1051100	1676	2266	1643	637	924	631	624	837	661	1543	1778	1392	590	749	606	637	767	786	893.12	1571	648	730	0.428	-1.224	-6.875	6.20556e-12	4.53203e-11	0.0296	0.0104	0.0239	0.0239	TRUE	0.3075	0.483	-1.051	-5.957	2.57175e-09	1.6509e-08	0.0296	0.0104	0.0239	0.0239	TRUE	0.3075
MD00G1051200	311	406	360	304	377	287	225	269	245	286	318	305	282	306	276	230	247	291	256.04	303	288	256	0.952	-0.071	-0.623	0.533436	0.617529	0.0034	0.0147	0.0077	0.0077	TRUE	0.0764	0.856	-0.225	-2.016	0.0437803	0.0781581	0.0034	0.0147	0.0077	0.0077	TRUE	0.0764
MD00G1051300	599	608	605	591	709	556	591	746	520	551	477	513	548	575	534	604	684	618	839.04	514	552	635	1.071	0.099	0.851	0.394976	0.482938	0.0091	0.0105	0.0095	0.0095	TRUE	0.0345	1.212	0.277	2.476	0.0132907	0.0274121	0.0091	0.0105	0.0095	0.0095	TRUE	0.0345
MD00G1051400	578	576	619	454	600	439	358	382	303	532	452	525	421	487	422	366	350	360	439.95	503	443	359	0.892	-0.165	-1.258	0.208393	0.281098	0.0135	0.0122	0.0131	0.0131	TRUE	0.2728	0.741	-0.433	-3.336	0.000851276	0.00231765	0.0135	0.0122	0.0131	0.0131	TRUE	0.2728
MD00G1051500	4178	4765	4088	5461	5845	5391	4272	4970	3272	3846	3738	3465	5061	4741	5179	4362	4556	3889	3882.96	3683	4994	4269	1.319	0.4	2.866	0.00415226	0.0087702	0.0192	0.009	0.0167	0.0167	TRUE	0.3585	1.134	0.182	1.391	0.164143	0.240914	0.0192	0.009	0.0167	0.0167	TRUE	0.3585
MD00G1051600	0	0	0	0	0	0	0	0	0	0	0	0	0	0	0	0	0	0	0	0	0	0	1	0	NA	NA	NA	NA	NA	NA	NA	NA	NA	1	0	NA	NA	NA	NA	NA	NA	NA	NA	NA
MD00G1051700	2	3	2	0	1	1	1	2	0	2	2	2	0	1	1	1	2	0	0.88	2	1	1	0.75	-0.415	-1.074	0.282752	0.364775	0	1.7929	0.894	0.894	TRUE	0.0992	0.869	-0.202	-0.654	0.512862	0.608444	0	1.7929	0.894	0.894	TRUE	0.0992
MD00G1051800	424	504	407	535	527	503	528	597	373	390	395	345	496	427	483	539	547	443	510.85	377	469	510	1.218	0.285	2.068	0.0386811	0.0649708	0.0159	0.0117	0.0146	0.0146	TRUE	0.2465	1.304	0.383	2.877	0.00401765	0.00942312	0.0159	0.0117	0.0146	0.0146	TRUE	0.2465
MD00G1051900	0	2	0	0	0	0	0	0	0	0	2	0	0	0	0	0	0	0	0.13	1	0	0	0.902	-0.148	-0.383	0.701528	NA	0	11.9678	12	12	TRUE	0.4869	0.919	-0.122	-0.336	0.737077	NA	0	11.9678	12	12	TRUE	0.4869
MD00G1052000	1105	1285	1135	1793	1827	1733	1863	2253	1587	1017	1008	962	1662	1482	1665	1902	2065	1886	1318.43	996	1603	1951	1.582	0.662	6.636	3.22307e-11	2.18286e-10	0.006	0.0098	0.007	0.007	TRUE	0.112	1.935	0.952	9.398	5.56126e-21	1.01062e-19	0.006	0.0098	0.007	0.007	TRUE	0.112
MD00G1052100	172	198	188	104	170	143	223	306	221	158	155	159	96	138	137	228	281	263	181.42	157	124	257	0.812	-0.3	-1.822	0.0685174	0.107155	0.0213	0.0172	0.0197	0.0197	TRUE	0.3469	1.537	0.62	3.829	0.00012855	0.000411046	0.0213	0.0172	0.0197	0.0197	TRUE	0.3469
MD00G1052200	0	0	0	0	1	0	0	0	0	0	0	0	0	1	0	0	0	0	0.19	0	0	0	1.065	0.09	0.236	0.813239	NA	0	8.2429	12	12	TRUE	0.32	1	0	0	1	NA	0	8.2429	12	12	TRUE	0.32
MD00G1052300	0	0	0	0	0	0	0	0	0	0	0	0	0	0	0	0	0	0	0	0	0	0	1	0	NA	NA	NA	NA	NA	NA	NA	NA	NA	1	0	NA	NA	NA	NA	NA	NA	NA	NA	NA
MD00G1052400	0	1	0	0	0	0	0	0	0	0	1	0	0	0	0	0	0	0	0.07	0	0	0	0.948	-0.076	-0.2	0.841337	NA	0	23.9269	12	12	TRUE	0.1785	0.963	-0.055	-0.153	0.878411	NA	0	23.9269	12	12	TRUE	0.1785
MD00G1052500	1	0	1	1	0	0	0	0	0	1	0	1	1	0	0	0	0	0	0.22	1	0	0	0.942	-0.086	-0.223	0.823751	NA	0	6.9714	9.186	9.186	TRUE	0.2275	0.899	-0.154	-0.416	0.677086	NA	0	6.9714	9.186	9.186	TRUE	0.2275
MD00G1052600	3	0	2	2	3	5	14	13	11	3	0	2	2	2	5	14	12	13	17.12	2	3	13	1.35	0.433	1.292	0.196337	0.266981	0	0.0999	0.0513	0.0513	TRUE	0.2797	7.458	2.899	4.358	1.31318e-05	4.97901e-05	0	0.0999	0.0513	0.0513	TRUE	0.2797
MD00G1052700	356	441	367	286	271	254	241	205	171	328	346	311	265	220	244	246	188	203	259.36	328	243	212	0.755	-0.405	-3.214	0.00130855	0.00305548	0.0076	0.0147	0.0101	0.0101	TRUE	0.1072	0.67	-0.578	-4.535	5.76696e-06	2.31623e-05	0.0076	0.0147	0.0101	0.0101	TRUE	0.1072
MD00G1052800	0	0	0	0	0	0	0	0	0	0	0	0	0	0	0	0	0	0	0	0	0	0	1	0	NA	NA	NA	NA	NA	NA	NA	NA	NA	1	0	NA	NA	NA	NA	NA	NA	NA	NA	NA
MD00G1052900	50	68	54	32	30	18	14	16	15	46	53	46	30	24	17	14	15	18	27.53	48	24	16	0.55	-0.862	-3.55	0.000384575	0.000994853	0	0.0654	0.0324	0.0324	TRUE	0.1627	0.347	-1.528	-5.112	3.18852e-07	1.55303e-06	0	0.0654	0.0324	0.0324	TRUE	0.1627
MD00G1053000	0	1	0	0	0	0	0	0	0	0	1	0	0	0	0	0	0	0	0.07	0	0	0	0.948	-0.076	-0.2	0.841337	NA	0	23.9269	12	12	TRUE	0.1785	0.963	-0.055	-0.153	0.878411	NA	0	23.9269	12	12	TRUE	0.1785
MD00G1053100	0	1	1	0	1	1	0	3	2	0	1	1	0	1	1	0	3	2	8.07	1	1	2	1.012	0.018	0.054	0.956864	0.975196	0	0.2024	0.1342	0.1342	TRUE	0.1011	1.352	0.435	1.251	0.21087	0.296775	0	0.2024	0.1342	0.1342	TRUE	0.1011
MD00G1053300	1068	1128	1228	1129	1343	1031	788	1009	748	983	885	1041	1046	1089	990	805	925	889	817.7	970	1042	873	1.069	0.096	0.767	0.443015	0.530559	0.0135	0.0105	0.0125	0.0125	TRUE	0.3395	0.913	-0.132	-1.104	0.269702	0.363457	0.0135	0.0105	0.0125	0.0125	TRUE	0.3395
MD00G1053500	0	0	0	0	0	0	0	0	0	0	0	0	0	0	0	0	0	0	0	0	0	0	1	0	NA	NA	NA	NA	NA	NA	NA	NA	NA	1	0	NA	NA	NA	NA	NA	NA	NA	NA	NA
MD00G1053600	0	0	0	0	0	0	0	0	0	0	0	0	0	0	0	0	0	0	0	0	0	0	1	0	NA	NA	NA	NA	NA	NA	NA	NA	NA	1	0	NA	NA	NA	NA	NA	NA	NA	NA	NA
MD00G1053700	126	160	134	94	103	102	114	130	69	116	126	114	87	84	98	116	119	82	145.88	119	90	106	0.778	-0.362	-2.387	0.0169857	0.0312157	0.0073	0.0193	0.0123	0.0123	TRUE	0.1726	0.917	-0.125	-0.895	0.370588	0.470554	0.0073	0.0193	0.0123	0.0123	TRUE	0.1726
MD00G1053800	0	1	0	15	9	8	6	7	7	0	1	0	14	7	8	6	6	8	5.12	0	10	7	17.87	4.159	3.866	0.000110476	0.000314572	0	0.3138	0.1488	0.1488	TRUE	0.2693	11.422	3.514	3.458	0.000544484	0.00154484	0	0.3138	0.1488	0.1488	TRUE	0.2693
MD00G1053900	11	14	14	25	22	16	8	10	5	10	11	12	23	18	15	8	9	6	21.98	11	19	8	1.457	0.543	2.087	0.0368762	0.0623464	0	0.0798	0.0361	0.0361	TRUE	0.1096	0.841	-0.25	-1.097	0.272813	0.366641	0	0.0798	0.0361	0.0361	TRUE	0.1096
MD00G1054000	9	9	5	7	7	6	13	13	7	8	7	4	6	6	6	13	12	8	5.92	6	6	11	0.961	-0.057	-0.208	0.835525	0.878495	0	0.2728	0.1201	0.1201	TRUE	0.1344	1.29	0.368	1.392	0.163882	0.240588	0	0.2728	0.1201	0.1201	TRUE	0.1344
MD00G1054100	230	235	313	275	317	281	153	197	138	212	184	265	255	257	270	156	181	164	203.54	220	261	167	1.156	0.209	1.283	0.199658	0.270824	0.0257	0.0163	0.022	0.022	TRUE	0.4147	0.8	-0.323	-2.06	0.0393843	0.071269	0.0257	0.0163	0.022	0.022	TRUE	0.4147
MD00G1054200	45	52	49	11	19	19	43	62	44	41	41	42	10	15	18	44	57	52	28.35	41	14	51	0.389	-1.362	-4.814	1.48143e-06	5.65082e-06	0	0.0638	0.0287	0.0287	TRUE	0.1585	1.161	0.215	1.181	0.237464	0.327588	0	0.0638	0.0287	0.0287	TRUE	0.1585
MD00G1054300	4	6	5	1	0	0	0	1	6	4	5	4	1	0	0	0	1	7	1.88	4	0	3	0.328	-1.608	-2.289	0.0220915	0.0395484	0.7112	0.8422	0.7956	0.7956	TRUE	1.0571	0.893	-0.164	-0.571	0.567749	0.658251	0.7112	0.8422	0.7956	0.7956	TRUE	1.0571
MD00G1054400	0	1	5	0	0	0	0	1	4	0	1	4	0	0	0	0	1	5	0.97	2	0	2	0.588	-0.767	-1.508	0.131429	0.189023	3.6905	1.6259	2.2936	2.2936	TRUE	0.3344	1.016	0.023	0.073	0.942118	0.962219	3.6905	1.6259	2.2936	2.2936	TRUE	0.3344
MD00G1054500	576	595	601	567	617	512	674	648	484	530	467	509	525	500	492	688	594	575	478.55	502	506	619	1.008	0.011	0.119	0.90556	0.935048	0.0029	0.0119	0.0056	0.0056	TRUE	0.0559	1.217	0.284	3.035	0.00240932	0.00595227	0.0029	0.0119	0.0056	0.0056	TRUE	0.0559
MD00G1054600	0	0	0	0	0	0	0	0	0	0	0	0	0	0	0	0	0	0	0	0	0	0	1	0	NA	NA	NA	NA	NA	NA	NA	NA	NA	1	0	NA	NA	NA	NA	NA	NA	NA	NA	NA
MD00G1055100	6	6	4	4	11	3	6	10	4	6	5	3	4	9	3	6	9	5	8.09	5	5	7	1.069	0.096	0.341	0.733447	0.79306	0	0.2018	0.1286	0.1286	TRUE	0.5161	1.172	0.229	0.907	0.364446	0.46432	0	0.2018	0.1286	0.1286	TRUE	0.5161
MD00G1055200	910	1079	1070	880	1001	906	772	901	657	838	846	907	816	812	870	788	826	781	823.87	864	833	798	0.965	-0.051	-0.577	0.563639	0.645123	0.0029	0.0105	0.0051	0.0051	TRUE	0.0834	0.93	-0.105	-1.208	0.227001	0.315512	0.0029	0.0105	0.0051	0.0051	TRUE	0.0834
MD00G1055300	1398	1584	1516	1065	1166	1018	1053	1157	913	1287	1243	1285	987	946	978	1075	1061	1085	1058.19	1272	970	1074	0.767	-0.383	-5.956	2.57966e-09	1.41277e-08	0	0.0101	0.0023	0.0023	TRUE	0.0187	0.849	-0.236	-3.71	0.000207458	0.000637557	0	0.0101	0.0023	0.0023	TRUE	0.0187
MD00G1055400	88	66	107	15	11	21	13	20	16	81	52	91	14	9	20	13	18	19	37.63	75	14	17	0.203	-2.298	-6.751	1.46482e-11	1.02907e-10	0.0555	0.0502	0.0531	0.0531	TRUE	0.1778	0.244	-2.038	-6.076	1.2334e-09	8.26034e-09	0.0555	0.0502	0.0531	0.0531	TRUE	0.1778
MD00G1055600	421	473	411	352	351	261	304	327	261	388	371	348	326	285	251	310	300	310	308.94	369	287	307	0.789	-0.342	-3.269	0.00107795	0.00256262	0.0021	0.0137	0.006	0.006	TRUE	0.0778	0.844	-0.244	-2.398	0.0164637	0.0331265	0.0021	0.0137	0.006	0.006	TRUE	0.0778
MD00G1055800	839	965	1007	1034	1294	963	906	1016	899	772	757	853	958	1049	925	925	931	1069	869.53	794	977	975	1.211	0.276	2.147	0.0318057	0.0545906	0.0149	0.0104	0.0131	0.0131	TRUE	0.3096	1.197	0.259	2.107	0.0351306	0.0644759	0.0149	0.0104	0.0131	0.0131	TRUE	0.3096
MD00G1056000	456	637	538	783	940	796	1124	1265	1054	420	500	456	726	762	765	1148	1160	1253	679.73	459	751	1187	1.61	0.687	7.001	2.54226e-12	1.93432e-11	0.0034	0.0109	0.0059	0.0059	TRUE	0.0752	2.564	1.358	13.65	2.01325e-42	1.07865e-40	0.0034	0.0109	0.0059	0.0059	TRUE	0.0752
MD00G1056100	454	516	494	314	365	291	192	197	221	418	405	419	291	296	280	196	181	263	314.06	414	289	213	0.716	-0.482	-3.828	0.000129023	0.000363553	0.0088	0.0136	0.0106	0.0106	TRUE	0.2159	0.525	-0.928	-6.903	5.0941e-12	4.43725e-11	0.0088	0.0136	0.0106	0.0106	TRUE	0.2159
MD00G1056200	0	0	0	1	1	1	1	3	0	0	0	0	1	1	1	1	3	0	0.54	0	1	1	1.388	0.473	1.097	0.272804	NA	0	2.9087	2.3169	2.3169	TRUE	0.0417	1.513	0.597	1.339	0.180429	NA	0	2.9087	2.3169	2.3169	TRUE	0.0417
MD00G1056300	281	315	368	265	322	293	132	127	129	259	247	312	246	261	281	135	116	153	199.64	273	263	135	0.969	-0.046	-0.284	0.776213	0.829631	0.0255	0.0165	0.0218	0.0218	TRUE	0.501	0.518	-0.95	-5.247	1.54224e-07	7.85014e-07	0.0255	0.0165	0.0218	0.0218	TRUE	0.501
MD00G1056400	221	207	172	326	389	335	222	261	164	203	162	146	302	315	322	227	239	195	201.07	170	313	220	1.788	0.838	6.357	2.05973e-10	1.27333e-09	0.0058	0.0164	0.0099	0.0099	TRUE	0.1496	1.259	0.332	2.636	0.00838154	0.0181925	0.0058	0.0164	0.0099	0.0099	TRUE	0.1496
MD00G1056500	67	98	86	47	30	30	31	26	13	62	77	73	44	24	29	32	24	15	52.81	71	32	24	0.496	-1.01	-4.32	1.55816e-05	5.09592e-05	0.0209	0.0382	0.03	0.03	TRUE	0.3371	0.361	-1.472	-5.526	3.27959e-08	1.82859e-07	0.0209	0.0382	0.03	0.03	TRUE	0.3371
MD00G1056700	126	158	141	60	66	53	44	58	49	116	124	119	56	54	51	45	53	58	60.46	120	54	52	0.467	-1.098	-5.811	6.19841e-09	3.23542e-08	0	0.0345	0.0171	0.0171	TRUE	0.5473	0.452	-1.144	-5.847	5.00685e-09	3.09987e-08	0	0.0345	0.0171	0.0171	TRUE	0.5473
MD00G1056800	42	58	42	50	84	52	31	56	47	39	45	36	46	68	50	32	51	56	44.93	40	55	46	1.243	0.314	1.304	0.192232	0.26223	0.0928	0.0434	0.0705	0.0705	TRUE	0.1435	1.086	0.119	0.586	0.558096	0.649808	0.0928	0.0434	0.0705	0.0705	TRUE	0.1435
MD00G1056900	7	8	0	2	5	4	0	8	3	6	6	0	2	4	4	0	7	4	3.13	4	3	4	0.931	-0.103	-0.329	0.742273	0.800838	0.9856	0.5079	0.7199	0.7199	TRUE	0.0836	0.967	-0.049	-0.179	0.857695	0.898143	0.9856	0.5079	0.7199	0.7199	TRUE	0.0836
MD00G1057000	3	8	9	4	3	2	2	2	0	3	6	8	4	2	2	2	2	0	3.9	6	3	1	0.747	-0.421	-1.262	0.207086	0.279592	0	0.4091	0.2634	0.2634	TRUE	0.4508	0.536	-0.901	-2.045	0.0408332	0.0735744	0	0.4091	0.2634	0.2634	TRUE	0.4508
MD00G1057100	83	84	85	141	140	139	141	138	123	76	66	72	131	114	134	144	127	146	114.18	71	126	139	1.678	0.747	4.536	5.7331e-06	2.00363e-05	0.0082	0.0223	0.0139	0.0139	TRUE	0.2426	1.859	0.894	5.3	1.16077e-07	6.01013e-07	0.0082	0.0223	0.0139	0.0139	TRUE	0.2426
MD00G1057200	6	9	5	9	8	15	18	15	29	6	7	4	8	6	14	18	14	34	15.75	6	9	22	1.336	0.418	1.416	0.15685	0.220058	0.0843	0.1079	0.095	0.095	TRUE	0.3377	3.155	1.658	3.775	0.000159957	0.000503358	0.0843	0.1079	0.095	0.095	TRUE	0.3377
MD00G1057300	1	0	0	0	0	0	3	1	1	1	0	0	0	0	0	3	1	1	1.08	0	0	2	0.901	-0.15	-0.418	0.675904	0.744791	0	1.4526	1.2101	1.2101	TRUE	0.0982	1.475	0.56	1.34	0.180192	0.26045	0	1.4526	1.2101	1.2101	TRUE	0.0982
MD00G1057400	119	172	127	1	2	0	1	1	0	110	135	108	1	2	0	1	1	0	29.87	118	1	1	0.01	-6.659	-8.096	5.68893e-16	6.08374e-15	0	0.061	0.0402	0.0402	TRUE	0.4835	0.009	-6.859	-7.064	1.61558e-12	1.47551e-11	0	0.061	0.0402	0.0402	TRUE	0.4835
MD00G1057500	15	17	20	2	0	4	0	0	0	14	13	17	2	0	4	0	0	0	4.15	15	2	0	0.203	-2.3	-3.311	0.000930473	0.002241	0	0.3855	0.3194	0.3194	TRUE	0.348	0.023	-5.415	-4.583	4.58459e-06	1.87025e-05	0	0.3855	0.3194	0.3194	TRUE	0.348
MD00G1057600	0	0	0	0	0	0	0	0	0	0	0	0	0	0	0	0	0	0	0	0	0	0	1	0	NA	NA	NA	NA	NA	NA	NA	NA	NA	1	0	NA	NA	NA	NA	NA	NA	NA	NA	NA
MD00G1057700	955	1138	921	1009	1292	978	974	1219	814	879	893	781	935	1048	939	995	1117	968	1258.99	851	974	1027	1.132	0.178	1.351	0.176825	0.244107	0.016	0.0099	0.0142	0.0142	TRUE	0.0467	1.177	0.236	1.872	0.0612408	0.104344	0.016	0.0099	0.0142	0.0142	TRUE	0.0467
MD00G1057800	233	287	314	247	288	270	257	313	269	214	225	266	229	234	259	262	287	320	268.51	235	241	290	1.02	0.028	0.199	0.842125	0.883765	0.0143	0.0144	0.0143	0.0143	TRUE	0.2619	1.192	0.254	1.891	0.0586012	0.100485	0.0143	0.0144	0.0143	0.0143	TRUE	0.2619
MD00G1057900	503	703	579	483	565	519	373	351	309	463	551	491	448	458	499	381	322	367	412.05	502	468	357	0.936	-0.095	-0.829	0.406844	0.494999	0.0073	0.0124	0.009	0.009	TRUE	0.125	0.73	-0.454	-3.956	7.61062e-05	0.000252874	0.0073	0.0124	0.009	0.009	TRUE	0.125
MD00G1058000	481	535	524	430	491	381	351	347	277	443	420	444	398	398	366	358	318	329	291.93	436	387	335	0.895	-0.16	-1.686	0.0918813	0.138356	0	0.014	0.0049	0.0049	TRUE	0.0213	0.783	-0.353	-3.711	0.000206366	0.000634462	0	0.014	0.0049	0.0049	TRUE	0.0213
MD00G1058100	83	153	80	34	31	41	28	19	18	76	120	68	32	25	39	29	17	21	36.12	88	32	22	0.4	-1.321	-4.589	4.44683e-06	1.57851e-05	0.0576	0.0519	0.0549	0.0549	TRUE	0.6131	0.273	-1.872	-5.831	5.51793e-09	3.39824e-08	0.0576	0.0519	0.0549	0.0549	TRUE	0.6131
MD00G1058200	0	0	0	0	0	0	0	0	0	0	0	0	0	0	0	0	0	0	0	0	0	0	1	0	NA	NA	NA	NA	NA	NA	NA	NA	NA	1	0	NA	NA	NA	NA	NA	NA	NA	NA	NA
MD00G1058300	750	841	811	1454	1608	1372	1180	1305	1026	690	660	687	1347	1304	1318	1205	1196	1220	861.26	679	1323	1207	1.896	0.923	6.989	2.77361e-12	2.10433e-11	0.0144	0.0104	0.0127	0.0127	TRUE	0.5337	1.725	0.786	6.005	1.91086e-09	1.2477e-08	0.0144	0.0104	0.0127	0.0127	TRUE	0.5337
MD00G1058400	12	12	7	1	0	1	0	0	1	11	9	6	1	0	1	0	0	1	2.53	9	1	0	0.158	-2.659	-3.049	0.00229462	0.0051057	0	0.6263	0.3669	0.3669	TRUE	0.2487	0.1	-3.325	-3.257	0.00112412	0.00297969	0	0.6263	0.3669	0.3669	TRUE	0.2487
MD00G1058500	245	302	285	268	262	275	279	295	279	226	237	242	248	212	264	285	270	332	344.23	235	241	296	1.025	0.036	0.323	0.746468	0.804457	0.0029	0.0132	0.0065	0.0065	TRUE	0.0655	1.23	0.299	2.772	0.00556777	0.0125992	0.0029	0.0132	0.0065	0.0065	TRUE	0.0655
MD00G1058600	763	895	797	989	1026	960	656	696	511	702	702	675	917	832	922	670	638	607	686.5	693	890	638	1.244	0.314	1.952	0.0509466	0.0826898	0.0303	0.0109	0.0235	0.0235	TRUE	0.2458	0.937	-0.094	-0.638	0.52328	0.617914	0.0303	0.0109	0.0235	0.0235	TRUE	0.2458
MD00G1058700	181	250	186	303	309	267	175	192	124	167	196	158	281	251	256	179	176	147	184.75	174	263	167	1.472	0.558	4.428	9.50179e-06	3.2141e-05	0.0037	0.0171	0.0089	0.0089	TRUE	0.074	0.971	-0.042	-0.347	0.728565	0.795671	0.0037	0.0171	0.0089	0.0089	TRUE	0.074
MD00G1058800	0	0	0	1	1	1	2	1	0	0	0	0	1	1	1	2	1	0	0.78	0	1	1	1.537	0.62	1.376	0.16889	0.234427	0	2.025	0.9219	0.9219	TRUE	0.077	1.567	0.648	1.466	0.142548	0.213762	0	2.025	0.9219	0.9219	TRUE	0.077
MD00G1058900	94	133	115	150	151	135	84	106	60	87	104	97	139	122	130	86	97	71	117.32	96	130	85	1.302	0.381	2.314	0.0206847	0.037257	0.0152	0.022	0.0178	0.0178	TRUE	0.0696	0.909	-0.137	-0.888	0.374781	0.47473	0.0152	0.022	0.0178	0.0178	TRUE	0.0696
MD00G1059000	74	93	61	0	0	0	1	0	0	68	73	52	0	0	0	1	0	0	52.38	64	0	0	0.004	-7.801	-7.128	1.0219e-12	8.14942e-12	0	0.0385	0.044	0.044	TRUE	0.1775	0.01	-6.706	-6.159	7.3376e-10	5.04088e-09	0	0.0385	0.044	0.044	TRUE	0.1775
MD00G1059100	179	232	213	207	241	207	209	236	149	165	182	181	192	195	199	213	216	177	349.69	176	195	202	1.103	0.142	1.315	0.18849	0.257919	0	0.0131	0.0047	0.0047	TRUE	0.0585	1.139	0.188	1.788	0.073791	0.122394	0	0.0131	0.0047	0.0047	TRUE	0.0585
MD00G1059200	441	549	454	313	304	284	339	352	326	406	431	385	290	247	273	346	323	388	378.91	407	270	352	0.682	-0.551	-4.103	4.07991e-05	0.000124664	0.0123	0.0127	0.0124	0.0124	TRUE	0.0693	0.881	-0.184	-1.471	0.141392	0.212319	0.0123	0.0127	0.0124	0.0124	TRUE	0.0693
MD00G1059300	0	0	0	5	5	4	0	5	2	0	0	0	5	4	4	0	5	2	2.98	0	4	2	11.965	3.581	3.391	0.000696349	0.00171852	0	0.5341	0.3014	0.3014	TRUE	0.1618	4.668	2.223	2.701	0.00691969	0.0153082	0	0.5341	0.3014	0.3014	TRUE	0.1618
MD00G1059400	1	0	2	1	0	1	0	0	2	1	0	2	1	0	1	0	0	2	1.71	1	1	1	0.933	-0.101	-0.3	0.764084	0.819792	0	0.9223	0.7508	0.7508	TRUE	0.4256	0.969	-0.045	-0.151	0.879672	0.914675	0	0.9223	0.7508	0.7508	TRUE	0.4256
MD00G1059700	0	0	0	0	0	0	0	0	0	0	0	0	0	0	0	0	0	0	0	0	0	0	1	0	NA	NA	NA	NA	NA	NA	NA	NA	NA	1	0	NA	NA	NA	NA	NA	NA	NA	NA	NA
MD00G1059800	0	0	0	30	38	36	24	22	11	0	0	0	28	31	35	25	20	13	15.89	0	31	19	117.402	6.875	6.262	3.79226e-10	2.28123e-09	0	0.107	0.0569	0.0569	TRUE	0.1163	75.427	6.237	5.675	1.38982e-08	8.16804e-08	0	0.107	0.0569	0.0569	TRUE	0.1163
MD00G1059900	0	0	0	0	0	0	0	0	0	0	0	0	0	0	0	0	0	0	0	0	0	0	1	0	NA	NA	NA	NA	NA	NA	NA	NA	NA	1	0	NA	NA	NA	NA	NA	NA	NA	NA	NA
MD00G1060000	1	0	0	0	0	0	0	0	0	1	0	0	0	0	0	0	0	0	0.18	0	0	0	0.948	-0.076	-0.2	0.841335	NA	0	8.566	12	12	TRUE	0.251	0.963	-0.055	-0.153	0.87841	NA	0	8.566	12	12	TRUE	0.251
MD00G1060100	2682	3168	3111	2293	3128	2231	1735	2064	1836	2469	2485	2637	2125	2537	2143	1772	1892	2182	2177.56	2530	2268	1949	0.902	-0.148	-1.373	0.169598	0.235227	0.0089	0.0093	0.0091	0.0091	TRUE	0.0755	0.787	-0.346	-3.283	0.00102713	0.00274696	0.0089	0.0093	0.0091	0.0091	TRUE	0.0755
MD00G1060200	64	84	98	53	52	47	72	80	65	59	66	83	49	42	45	74	73	77	48.93	69	45	75	0.701	-0.513	-2.666	0.00766787	0.0152931	0.0024	0.0406	0.0218	0.0218	TRUE	0.8963	1.056	0.079	0.481	0.63067	0.713046	0.0024	0.0406	0.0218	0.0218	TRUE	0.8963
MD00G1060300	568	614	528	666	649	579	443	478	320	523	482	447	617	526	556	452	438	380	474.62	484	566	423	1.151	0.203	1.396	0.162772	0.227289	0.0203	0.0119	0.0174	0.0174	TRUE	0.3852	0.896	-0.159	-1.158	0.24699	0.338217	0.0203	0.0119	0.0174	0.0174	TRUE	0.3852
MD00G1060400	59	108	71	43	50	41	75	58	47	54	85	60	40	41	39	77	53	56	118.45	66	40	62	0.641	-0.643	-3.407	0.000657415	0.0016314	0.0114	0.0218	0.0165	0.0165	TRUE	0.2812	0.944	-0.083	-0.526	0.598647	0.685051	0.0114	0.0218	0.0165	0.0165	TRUE	0.2812
MD00G1060500	0	2	0	0	1	0	0	0	0	0	2	0	0	1	0	0	0	0	0.62	1	0	0	0.922	-0.117	-0.322	0.747496	NA	0	2.5119	2.1249	2.1249	TRUE	0.4866	0.854	-0.228	-0.646	0.518584	NA	0	2.5119	2.1249	2.1249	TRUE	0.4866
MD00G1060600	2	2	1	0	0	0	0	0	1	2	2	1	0	0	0	0	0	1	0.82	2	0	0	0.547	-0.869	-1.667	0.0954762	0.143088	0	1.922	1.1944	1.1944	TRUE	0.2527	0.767	-0.383	-1.038	0.29909	0.395569	0	1.922	1.1944	1.1944	TRUE	0.2527
MD00G1060700	1197	1337	1242	1225	1364	1112	881	946	831	1102	1049	1053	1135	1106	1068	900	867	988	906.3	1068	1103	918	1.032	0.046	0.568	0.570218	0.651074	0.002	0.0103	0.0043	0.0043	TRUE	0.0586	0.866	-0.208	-2.575	0.010031	0.0213656	0.002	0.0103	0.0043	0.0043	TRUE	0.0586
MD00G1060800	218	245	201	256	344	295	134	184	107	201	192	170	237	279	283	137	169	127	151.92	188	266	144	1.381	0.466	3.439	0.000584732	0.00146438	0	0.0189	0.0117	0.0117	TRUE	0.1196	0.8	-0.321	-2.392	0.0167476	0.0336493	0	0.0189	0.0117	0.0117	TRUE	0.1196
MD00G1060900	756	890	785	567	569	499	520	528	498	696	698	665	525	461	479	531	484	592	683.91	686	488	536	0.72	-0.475	-5.389	7.07126e-08	3.23146e-07	0.0016	0.0109	0.0044	0.0044	TRUE	0.0476	0.789	-0.342	-3.953	7.72049e-05	0.000256136	0.0016	0.0109	0.0044	0.0044	TRUE	0.0476
MD00G1061000	3	2	7	0	0	0	0	0	0	3	2	6	0	0	0	0	0	0	0.86	4	0	0	0.439	-1.187	-1.883	0.0597617	0.0949961	0	1.8368	2.764	2.764	TRUE	0.0333	0.491	-1.028	-1.793	0.0729751	0.121235	0	1.8368	2.764	2.764	TRUE	0.0333
MD00G1061100	3619	3626	3863	1401	1934	1363	5356	7078	4224	3331	2844	3274	1298	1569	1309	5469	6489	5021	2784.6	3150	1392	5660	0.452	-1.146	-8.448	2.97414e-17	3.51969e-16	0.0158	0.0092	0.0135	0.0135	TRUE	0.1322	1.745	0.803	6.118	9.48352e-10	6.43802e-09	0.0158	0.0092	0.0135	0.0135	TRUE	0.1322
MD00G1061200	42	56	37	67	99	74	61	40	26	39	44	31	62	80	71	62	37	31	49.37	38	71	43	1.696	0.762	3.396	0.000684573	0.00169327	0.0282	0.0403	0.0338	0.0338	TRUE	0.503	1.092	0.127	0.684	0.494223	0.591298	0.0282	0.0403	0.0338	0.0338	TRUE	0.503
MD00G1061600	122	149	111	109	141	131	76	80	80	112	117	94	101	114	126	78	73	95	94.57	108	114	82	1.048	0.068	0.46	0.64584	0.718199	0	0.0252	0.0122	0.0122	TRUE	0.0828	0.792	-0.336	-2.279	0.0226604	0.0439376	0	0.0252	0.0122	0.0122	TRUE	0.0828
MD00G1061700	569	661	639	633	825	672	414	457	405	524	519	542	587	669	646	423	419	481	572.98	528	634	441	1.187	0.247	2.18	0.0292912	0.0507866	0.0081	0.0114	0.0091	0.0091	TRUE	0.0726	0.85	-0.235	-2.111	0.0347341	0.0638615	0.0081	0.0114	0.0091	0.0091	TRUE	0.0726
MD00G1061800	3106	3829	3172	2547	2636	2356	2523	2788	2244	2859	3004	2688	2360	2138	2263	2576	2556	2667	2831.6	2850	2254	2600	0.801	-0.321	-2.99	0.00279105	0.00610787	0.0083	0.0092	0.0089	0.0089	TRUE	0.0812	0.92	-0.121	-1.172	0.241233	0.331879	0.0083	0.0092	0.0089	0.0089	TRUE	0.0812
MD00G1061900	0	0	0	0	0	0	1	0	0	0	0	0	0	0	0	1	0	0	0.09	0	0	0	1	0	0	1	NA	0	18.3825	12	12	TRUE	0.2059	1.074	0.103	0.283	0.77683	NA	0	18.3825	12	12	TRUE	0.2059
MD00G1062000	0	0	0	0	0	0	0	0	0	0	0	0	0	0	0	0	0	0	0	0	0	0	1	0	NA	NA	NA	NA	NA	NA	NA	NA	NA	1	0	NA	NA	NA	NA	NA	NA	NA	NA	NA
MD00G1062100	129	136	142	163	169	140	148	176	124	119	107	120	151	137	134	151	161	147	138.91	115	141	153	1.205	0.269	2.136	0.0327158	0.0560109	0	0.0199	0.0065	0.0065	TRUE	0.0232	1.294	0.372	3.033	0.00242247	0.00598159	0	0.0199	0.0065	0.0065	TRUE	0.0232
MD00G1062200	2034	2346	2115	2405	2665	2339	1521	1737	1333	1872	1840	1792	2229	2161	2247	1553	1592	1585	1644.79	1835	2212	1577	1.202	0.265	4.624	3.75512e-06	1.34538e-05	0	0.0096	0.002	0.002	TRUE	0.0171	0.863	-0.213	-3.659	0.000253475	0.000766096	0	0.0096	0.002	0.002	TRUE	0.0171
MD00G1062300	263	339	311	142	122	130	102	97	84	242	266	264	132	99	125	104	89	100	125.93	257	119	98	0.472	-1.084	-7.484	7.2005e-14	6.43747e-13	0	0.021	0.0108	0.0108	TRUE	0.1141	0.386	-1.373	-8.924	4.51038e-19	7.20309e-18	0	0.021	0.0108	0.0108	TRUE	0.1141
MD00G1062400	0	0	0	0	0	0	0	0	0	0	0	0	0	0	0	0	0	0	0	0	0	0	1	0	NA	NA	NA	NA	NA	NA	NA	NA	NA	1	0	NA	NA	NA	NA	NA	NA	NA	NA	NA
MD00G1062600	0	0	0	2	1	1	1	1	2	0	0	0	2	1	1	1	1	2	0.66	0	1	1	1.659	0.731	1.497	0.134354	NA	0	2.3716	1.4173	1.4173	TRUE	0.0895	1.736	0.795	1.618	0.105634	NA	0	2.3716	1.4173	1.4173	TRUE	0.0895
MD00G1062700	1	0	0	40	54	52	46	74	36	1	0	0	37	44	50	47	68	43	33	0	44	53	87.589	6.453	5.953	2.6288e-09	1.4382e-08	0	0.056	0.0329	0.0329	TRUE	0.281	105.25	6.718	6.188	6.10671e-10	4.2327e-09	0	0.056	0.0329	0.0329	TRUE	0.281
MD00G1062800	36	50	58	15	20	5	3	11	3	33	39	49	14	16	5	3	10	4	16.15	40	12	6	0.346	-1.53	-3.989	6.6325e-05	0.000196104	0.0811	0.1055	0.0956	0.0956	TRUE	0.324	0.158	-2.659	-5.404	6.51492e-08	3.47556e-07	0.0811	0.1055	0.0956	0.0956	TRUE	0.324
MD00G1062900	59	64	46	37	38	34	55	56	38	54	50	39	34	31	33	56	51	45	38.79	48	33	51	0.736	-0.442	-2.138	0.0325107	0.0556852	0	0.0489	0.0257	0.0257	TRUE	0.3681	1.047	0.066	0.38	0.704001	0.775362	0	0.0489	0.0257	0.0257	TRUE	0.3681
MD00G1063000	5	13	8	47	58	47	112	106	95	5	10	7	44	47	45	114	97	113	59.11	7	45	108	5.885	2.557	7.78	7.27699e-15	7.1055e-14	0	0.0351	0.0145	0.0145	TRUE	0.2255	14.338	3.842	11.859	1.92608e-32	6.52209e-31	0	0.0351	0.0145	0.0145	TRUE	0.2255
MD00G1063200	0	0	2	4	6	2	2	2	3	0	0	2	4	5	2	2	2	4	2.38	1	4	3	2.096	1.068	2.011	0.0443712	0.0732255	0	0.6655	0.3682	0.3682	TRUE	0.293	1.546	0.629	1.552	0.120584	0.18574	0	0.6655	0.3682	0.3682	TRUE	0.293
MD00G1063300	0	0	0	0	0	0	0	0	0	0	0	0	0	0	0	0	0	0	0	0	0	0	1	0	NA	NA	NA	NA	NA	NA	NA	NA	NA	1	0	NA	NA	NA	NA	NA	NA	NA	NA	NA
MD00G1063400	686	747	723	646	710	585	597	691	537	631	586	613	599	576	562	610	633	638	630.38	610	579	627	0.952	-0.07	-0.615	0.538821	0.62239	0.0087	0.0111	0.0094	0.0094	TRUE	0.1035	1.025	0.036	0.326	0.744802	0.808691	0.0087	0.0111	0.0094	0.0094	TRUE	0.1035
MD00G1063500	28	43	32	32	43	35	40	37	25	26	34	27	30	35	34	41	34	30	27.34	29	33	35	1.097	0.133	0.637	0.524236	0.608996	0	0.0658	0.0271	0.0271	TRUE	0.0814	1.133	0.18	0.963	0.335563	0.434182	0	0.0658	0.0271	0.0271	TRUE	0.0814
MD00G1063600	0	0	0	0	0	0	0	0	0	0	0	0	0	0	0	0	0	0	0	0	0	0	1	0	NA	NA	NA	NA	NA	NA	NA	NA	NA	1	0	NA	NA	NA	NA	NA	NA	NA	NA	NA
MD00G1063700	5	6	8	3	15	14	13	9	5	5	5	7	3	12	13	13	8	6	6.28	6	9	9	1.302	0.38	1.232	0.218122	0.292497	0	0.2574	0.195	0.195	TRUE	0.4299	1.239	0.309	1.15	0.250072	0.341745	0	0.2574	0.195	0.195	TRUE	0.4299
MD00G1063900	479	555	562	536	638	552	383	485	336	441	435	476	497	517	530	391	445	399	366.62	451	515	412	1.133	0.18	1.662	0.0965092	0.144409	0.002	0.0129	0.0077	0.0077	TRUE	0.3453	0.922	-0.117	-1.102	0.270323	0.364096	0.002	0.0129	0.0077	0.0077	TRUE	0.3453
MD00G1064000	1387	1575	1323	1041	1099	1016	1000	985	806	1277	1236	1121	965	891	976	1021	903	958	800.38	1211	944	961	0.786	-0.348	-4.119	3.80345e-05	0.000116974	0	0.0106	0.0047	0.0047	TRUE	0.0253	0.803	-0.317	-3.805	0.000142027	0.000451122	0	0.0106	0.0047	0.0047	TRUE	0.0253
MD00G1064100	212	265	254	60	83	70	72	78	57	195	208	215	56	67	67	74	72	68	145.41	206	63	71	0.313	-1.676	-11.289	1.48924e-29	3.88076e-28	0	0.0194	0.0072	0.0072	TRUE	0.0505	0.35	-1.513	-10.142	3.61017e-24	7.98952e-23	0	0.0194	0.0072	0.0072	TRUE	0.0505
MD00G1064200	35	61	55	19	18	21	13	22	13	32	48	47	18	15	20	13	20	15	30.01	42	18	16	0.455	-1.136	-4.256	2.08302e-05	6.67604e-05	0	0.0607	0.0302	0.0302	TRUE	0.1641	0.427	-1.226	-4.338	1.44007e-05	5.42427e-05	0	0.0607	0.0302	0.0302	TRUE	0.1641
MD00G1064300	0	0	0	0	0	0	0	0	0	0	0	0	0	0	0	0	0	0	0	0	0	0	1	0	NA	NA	NA	NA	NA	NA	NA	NA	NA	1	0	NA	NA	NA	NA	NA	NA	NA	NA	NA
MD00G1064400	1522	1848	1620	1690	2102	1648	1309	1465	1005	1401	1450	1373	1566	1705	1583	1337	1343	1195	1361.82	1408	1618	1292	1.139	0.187	1.615	0.106248	0.157023	0.0106	0.0098	0.0106	0.0106	TRUE	0.1416	0.926	-0.111	-0.992	0.321055	0.419017	0.0106	0.0098	0.0106	0.0106	TRUE	0.1416
MD00G1064500	0	0	0	0	0	0	0	0	0	0	0	0	0	0	0	0	0	0	0	0	0	0	1	0	NA	NA	NA	NA	NA	NA	NA	NA	NA	1	0	NA	NA	NA	NA	NA	NA	NA	NA	NA
MD00G1064600	3	3	3	10	11	12	14	6	6	3	2	3	9	9	12	14	6	7	11.39	3	10	9	2.691	1.428	3.073	0.00211669	0.00474147	0	0.1459	0.0799	0.0799	TRUE	0.4399	2.339	1.226	2.794	0.00520252	0.0118627	0	0.1459	0.0799	0.0799	TRUE	0.4399
MD00G1064700	543	645	585	287	346	250	308	370	340	500	506	496	266	281	240	315	339	404	458.45	501	262	353	0.542	-0.884	-6.209	5.33862e-10	3.16096e-09	0.0144	0.012	0.0137	0.0137	TRUE	0.0716	0.732	-0.451	-3.409	0.00065177	0.00182042	0.0144	0.012	0.0137	0.0137	TRUE	0.0716
MD00G1064800	674	832	678	647	958	657	582	658	433	620	653	575	600	777	631	594	603	515	634.06	616	669	571	1.074	0.103	0.629	0.529224	0.613672	0.0318	0.0111	0.025	0.025	TRUE	0.1549	0.942	-0.086	-0.569	0.569405	0.659516	0.0318	0.0111	0.025	0.025	TRUE	0.1549
MD00G1065000	0	0	0	0	0	0	0	0	0	0	0	0	0	0	0	0	0	0	0.2	0	0	0	1	0	0	1	NA	0	7.9067	12	12	TRUE	0.0144	1	0	0	1	NA	0	7.9067	12	12	TRUE	0.0144
MD00G1065100	0	0	0	6	2	4	3	0	2	0	0	0	6	2	4	3	0	2	1.68	0	4	2	7.221	2.852	2.935	0.00334017	0.00718244	0	0.9415	0.6065	0.6065	TRUE	0.1023	2.565	1.359	2.156	0.0310691	0.0579344	0	0.9415	0.6065	0.6065	TRUE	0.1023
MD00G1065200	27	16	24	49	60	56	46	82	54	25	13	20	45	49	54	47	75	64	37.17	19	49	62	2.323	1.216	4.374	1.22174e-05	4.06411e-05	0.0274	0.0507	0.0392	0.0392	TRUE	0.124	3.037	1.603	5.48	4.26185e-08	2.33575e-07	0.0274	0.0507	0.0392	0.0392	TRUE	0.124
MD00G1065300	987	1096	963	1039	1127	955	865	977	696	909	860	816	963	914	917	883	896	827	895.13	862	931	869	1.079	0.11	1.57	0.116528	0.170198	0	0.0104	0.0028	0.0028	TRUE	0.0133	1.01	0.014	0.195	0.845039	0.888352	0	0.0104	0.0028	0.0028	TRUE	0.0133
MD00G1065500	43	47	42	6	16	12	2	3	0	40	37	36	6	13	12	2	3	0	12.24	38	10	2	0.314	-1.672	-4.354	1.338e-05	4.42598e-05	0	0.1363	0.0798	0.0798	TRUE	0.2762	0.053	-4.239	-6.024	1.70289e-09	1.11876e-08	0	0.1363	0.0798	0.0798	TRUE	0.2762
MD00G1065600	0	1	0	1	0	1	1	1	0	0	1	0	1	0	1	1	1	0	0.38	0	1	1	1.111	0.152	0.406	0.684871	NA	0	4.0789	2.8605	2.8605	TRUE	0.1785	1.113	0.154	0.441	0.659104	NA	0	4.0789	2.8605	2.8605	TRUE	0.1785
MD00G1065700	0	0	0	0	0	0	0	0	0	0	0	0	0	0	0	0	0	0	0	0	0	0	1	0	NA	NA	NA	NA	NA	NA	NA	NA	NA	1	0	NA	NA	NA	NA	NA	NA	NA	NA	NA
MD00G1065900	0	0	0	0	0	0	0	0	0	0	0	0	0	0	0	0	0	0	0	0	0	0	1	0	NA	NA	NA	NA	NA	NA	NA	NA	NA	1	0	NA	NA	NA	NA	NA	NA	NA	NA	NA
MD00G1066000	1	1	0	1	3	1	2	1	0	1	1	0	1	2	1	2	1	0	1.05	1	1	1	1.228	0.296	0.814	0.415622	0.503674	0	1.4958	0.974	0.974	TRUE	0.5258	1.109	0.149	0.475	0.63485	0.716648	0	1.4958	0.974	0.974	TRUE	0.5258
MD00G1066100	0	0	0	0	0	1	0	0	0	0	0	0	0	0	1	0	0	0	0.08	0	0	0	1.065	0.09	0.236	0.813237	NA	0	19.5408	12	12	TRUE	0.2449	1	0	0	1	NA	0	19.5408	12	12	TRUE	0.2449
MD00G1066200	25	34	33	0	0	0	0	1	0	23	27	28	0	0	0	0	1	0	10.79	26	0	0	0.011	-6.495	-5.727	1.02384e-08	5.21002e-08	0	0.1536	0.1528	0.1528	TRUE	0.1311	0.024	-5.396	-4.808	1.52216e-06	6.70461e-06	0	0.1536	0.1528	0.1528	TRUE	0.1311
MD00G1066300	82	82	95	0	0	0	0	0	1	75	64	81	0	0	0	0	0	1	26.4	73	0	0	0.004	-7.99	-7.325	2.39152e-13	2.02267e-12	0	0.0678	0.0335	0.0335	TRUE	0.2804	0.008	-6.893	-6.351	2.14299e-10	1.56445e-09	0	0.0678	0.0335	0.0335	TRUE	0.2804
MD00G1066600	419	427	432	608	720	566	365	402	279	386	335	366	563	584	544	373	369	332	538.67	362	564	358	1.54	0.623	7.213	5.48407e-13	4.49551e-12	0	0.0115	0.0037	0.0037	TRUE	0.0259	0.991	-0.013	-0.143	0.88599	0.919347	0	0.0115	0.0037	0.0037	TRUE	0.0259
MD00G1066700	768	877	724	823	887	917	726	740	572	707	688	614	763	719	881	741	678	680	687.99	670	788	700	1.154	0.207	1.36	0.173907	0.240506	0.0251	0.0109	0.0202	0.0202	TRUE	0.2182	1.037	0.052	0.371	0.710525	0.780748	0.0251	0.0109	0.0202	0.0202	TRUE	0.2182
MD00G1066800	240	322	258	386	415	316	226	261	177	221	253	219	358	337	304	231	239	210	310.58	231	333	227	1.409	0.494	4.107	4.01445e-05	0.000122805	0.0063	0.0137	0.0087	0.0087	TRUE	0.0994	0.986	-0.02	-0.175	0.860721	0.900519	0.0063	0.0137	0.0087	0.0087	TRUE	0.0994
MD00G1067000	0	0	1	1	1	1	2	1	1	0	0	1	1	1	1	2	1	1	0.64	0	1	1	1.237	0.306	0.812	0.416952	NA	0	2.4474	1.1643	1.1643	TRUE	0.2117	1.367	0.451	1.162	0.245197	NA	0	2.4474	1.1643	1.1643	TRUE	0.2117
MD00G1067100	0	0	0	0	0	0	0	0	0	0	0	0	0	0	0	0	0	0	0	0	0	0	1	0	NA	NA	NA	NA	NA	NA	NA	NA	NA	1	0	NA	NA	NA	NA	NA	NA	NA	NA	NA
MD00G1067200	527	595	503	934	909	875	523	456	345	485	467	426	866	737	841	534	418	410	459.19	459	815	454	1.732	0.793	6.814	9.48029e-12	6.79846e-11	0.0078	0.012	0.0091	0.0091	TRUE	0.1379	0.99	-0.014	-0.127	0.898815	0.928598	0.0078	0.012	0.0091	0.0091	TRUE	0.1379
MD00G1067300	925	956	1005	1079	1146	977	908	981	810	851	750	852	1000	929	939	927	899	963	957.27	818	956	930	1.148	0.199	1.32	0.186989	0.256146	0.0249	0.0103	0.0201	0.0201	TRUE	0.1765	1.111	0.152	1.082	0.279289	0.374064	0.0249	0.0103	0.0201	0.0201	TRUE	0.1765
MD00G1067400	2	7	4	3	9	5	27	17	9	2	5	3	3	7	5	28	16	11	7.14	3	5	18	1.14	0.19	0.646	0.518516	0.603629	0	0.2277	0.1694	0.1694	TRUE	0.0988	3.651	1.868	3.496	0.000471965	0.00135705	0	0.2277	0.1694	0.1694	TRUE	0.0988
MD00G1067500	200	218	186	147	128	133	99	112	102	184	171	158	136	104	128	101	103	121	177.5	171	123	108	0.738	-0.438	-3.072	0.00212942	0.00476741	0.0082	0.0174	0.0116	0.0116	TRUE	0.0467	0.663	-0.594	-4.087	4.3771e-05	0.000151863	0.0082	0.0174	0.0116	0.0116	TRUE	0.0467
MD00G1067600	0	0	0	1	0	2	1	0	1	0	0	0	1	0	2	1	0	1	0.42	0	1	1	1.316	0.397	0.934	0.350262	NA	0	3.7183	4.055	4.055	TRUE	0.0235	1.231	0.299	0.782	0.434376	NA	0	3.7183	4.055	4.055	TRUE	0.0235
MD00G1067700	0	0	0	0	0	0	0	0	0	0	0	0	0	0	0	0	0	0	0	0	0	0	1	0	NA	NA	NA	NA	NA	NA	NA	NA	NA	1	0	NA	NA	NA	NA	NA	NA	NA	NA	NA
MD00G1067800	0	0	0	0	0	0	0	0	0	0	0	0	0	0	0	0	0	0	0.29	0	0	0	1	0	0	1	NA	0	5.4437	12	12	TRUE	0.0151	1	0	0	1	NA	0	5.4437	12	12	TRUE	0.0151
MD00G1067900	17	31	40	62	78	52	217	240	164	16	24	34	57	63	50	222	220	195	98.24	25	57	212	2.132	1.092	4.749	2.04194e-06	7.61669e-06	0.0176	0.0245	0.0213	0.0213	TRUE	0.344	8.433	3.076	13.019	9.56605e-39	4.31862e-37	0.0176	0.0245	0.0213	0.0213	TRUE	0.344
MD00G1068000	2	5	1	3	1	2	3	1	4	2	4	1	3	1	2	3	1	5	2.7	2	2	3	0.938	-0.092	-0.301	0.763667	0.81945	0	0.5887	0.3031	0.3031	TRUE	0.1493	1.065	0.091	0.348	0.728082	0.795307	0	0.5887	0.3031	0.3031	TRUE	0.1493
MD00G1068100	0	2	0	0	0	0	0	0	0	0	2	0	0	0	0	0	0	0	0.13	1	0	0	0.902	-0.148	-0.383	0.701528	NA	0	11.9678	12	12	TRUE	0.4869	0.919	-0.122	-0.336	0.737077	NA	0	11.9678	12	12	TRUE	0.4869
MD00G1068300	201	232	257	336	463	299	265	307	233	185	182	218	311	376	287	271	281	277	271.25	195	325	276	1.609	0.686	4.802	1.56957e-06	5.96089e-06	0.013	0.0144	0.0135	0.0135	TRUE	0.175	1.359	0.442	3.229	0.00124059	0.00325557	0.013	0.0144	0.0135	0.0135	TRUE	0.175
MD00G1068500	4198	4912	4751	5055	6390	5307	7127	8106	6311	3864	3853	4027	4685	5183	5098	7278	7431	7502	7448.4	3915	4989	7404	1.27	0.345	6.207	5.39829e-10	3.19477e-09	0.0008	0.0088	0.0021	0.0021	TRUE	0.0173	1.883	0.913	16.382	2.59047e-60	2.44554e-58	0.0008	0.0088	0.0021	0.0021	TRUE	0.0173
MD00G1068600	1623	1893	1783	1866	2196	1832	1515	1725	1219	1494	1485	1511	1729	1781	1760	1547	1581	1449	1520.6	1497	1757	1526	1.164	0.219	2.091	0.036497	0.0617754	0.0077	0.0097	0.0083	0.0083	TRUE	0.1545	1.018	0.026	0.254	0.799223	0.851831	0.0077	0.0097	0.0083	0.0083	TRUE	0.1545
MD00G1068700	1584	1885	1646	1070	1091	980	592	714	564	1458	1479	1395	992	885	941	605	655	670	952.58	1444	939	643	0.67	-0.579	-4.417	1.00046e-05	3.37142e-05	0.0151	0.0103	0.0135	0.0135	TRUE	0.3201	0.454	-1.139	-8.211	2.198e-16	2.85686e-15	0.0151	0.0103	0.0135	0.0135	TRUE	0.3201
MD00G1068800	4	10	7	15	11	8	22	16	12	4	8	6	14	9	8	22	15	14	30.62	6	10	17	1.4	0.485	1.724	0.084659	0.128802	0	0.0597	0.0316	0.0316	TRUE	0.1857	2.418	1.274	3.575	0.000350667	0.00103232	0	0.0597	0.0316	0.0316	TRUE	0.1857
MD00G1069300	0	0	0	0	0	0	0	0	0	0	0	0	0	0	0	0	0	0	0	0	0	0	1	0	NA	NA	NA	NA	NA	NA	NA	NA	NA	1	0	NA	NA	NA	NA	NA	NA	NA	NA	NA
MD00G1069500	0	0	0	0	0	1	0	2	1	0	0	0	0	0	1	0	2	1	0.33	0	0	1	1.083	0.115	0.296	0.767171	NA	0	4.7196	6.9137	6.9137	TRUE	0.0966	1.239	0.309	0.787	0.43104	NA	0	4.7196	6.9137	6.9137	TRUE	0.0966
MD00G1069800	417	523	508	431	508	448	239	267	220	384	410	431	399	412	430	244	245	262	343.39	408	414	250	1.013	0.018	0.183	0.8549	0.894297	0.0018	0.0132	0.0057	0.0057	TRUE	0.075	0.625	-0.678	-6.411	1.44695e-10	1.07784e-09	0.0018	0.0132	0.0057	0.0057	TRUE	0.075
MD00G1069900	64	75	51	0	1	0	0	0	0	59	59	43	0	1	0	0	0	0	13.48	54	0	0	0.01	-6.626	-5.992	2.07645e-09	1.15036e-08	0	0.1246	0.0863	0.0863	TRUE	0.1698	0.006	-7.337	-6.603	4.01776e-11	3.1769e-10	0	0.1246	0.0863	0.0863	TRUE	0.1698
MD00G1070000	76	98	68	188	228	186	148	152	111	70	77	58	174	185	179	151	139	132	556.95	68	179	141	2.583	1.369	10.043	9.9075e-24	1.89014e-22	0	0.0114	0.0052	0.0052	TRUE	0.0739	2.017	1.012	7.242	4.41308e-13	4.28551e-12	0	0.0114	0.0052	0.0052	TRUE	0.0739
MD00G1070100	64	78	75	707	890	687	971	1124	803	59	61	64	655	722	660	992	1030	955	558.97	61	679	992	11.039	3.464	25.873	1.33237e-147	9.03345e-145	0	0.0114	0.0054	0.0054	TRUE	0.0639	16.132	4.012	30.111	3.47325e-199	3.08375e-196	0	0.0114	0.0054	0.0054	TRUE	0.0639
MD00G1070400	1468	1695	1631	1311	1520	1329	1283	1408	1059	1351	1330	1382	1215	1233	1277	1310	1291	1259	1334.63	1354	1242	1287	0.92	-0.12	-1.267	0.20503	0.277204	0.0051	0.0098	0.0064	0.0064	TRUE	0.1488	0.954	-0.068	-0.743	0.457663	0.556629	0.0051	0.0098	0.0064	0.0064	TRUE	0.1488
MD00G1070500	0	0	0	0	0	0	0	0	1	0	0	0	0	0	0	0	0	1	0.42	0	0	0	1	0	0	1	NA	12	3.7575	9.9981	9.9981	TRUE	0.7213	1.08	0.112	0.306	0.759466	NA	12	3.7575	9.9981	9.9981	TRUE	0.7213
MD00G1070600	0	0	0	1	0	0	0	0	0	0	0	0	1	0	0	0	0	0	0.08	0	0	0	1.065	0.09	0.236	0.813237	NA	0	20.255	12	12	TRUE	0.2275	1	0	0	1	NA	0	20.255	12	12	TRUE	0.2275
MD00G1070700	121	163	132	72	81	62	61	69	61	111	128	112	67	66	60	62	63	73	100.04	117	64	66	0.57	-0.811	-5.202	1.96797e-07	8.44484e-07	0	0.0243	0.0096	0.0096	TRUE	0.0403	0.588	-0.767	-4.875	1.08968e-06	4.89509e-06	0	0.0243	0.0096	0.0096	TRUE	0.0403
MD00G1070800	3	7	4	2	5	5	8	11	6	3	5	3	2	4	5	8	10	7	4.84	4	4	8	0.965	-0.052	-0.181	0.856493	0.895607	0	0.3315	0.1611	0.1611	TRUE	0.4663	1.419	0.505	1.652	0.0984754	0.156481	0	0.3315	0.1611	0.1611	TRUE	0.4663
MD00G1071000	744	745	742	814	894	808	699	783	527	685	584	629	754	725	776	714	718	626	644.44	633	752	686	1.182	0.241	2.778	0.00546319	0.0112485	0.0021	0.011	0.0046	0.0046	TRUE	0.0326	1.081	0.113	1.32	0.186698	0.268316	0.0021	0.011	0.0046	0.0046	TRUE	0.0326
MD00G1071100	300	320	281	392	356	349	259	293	208	276	251	238	363	289	335	264	269	247	271.19	255	329	260	1.268	0.342	2.895	0.00379102	0.00807259	0.0055	0.0144	0.0085	0.0085	TRUE	0.0683	1.019	0.027	0.237	0.812601	0.863105	0.0055	0.0144	0.0085	0.0085	TRUE	0.0683
MD00G1071200	621	780	690	977	1156	1011	1151	1242	913	572	612	585	905	938	971	1175	1139	1085	1171.8	590	938	1133	1.569	0.65	7.175	7.21359e-13	5.85153e-12	0.0036	0.01	0.0051	0.0051	TRUE	0.07	1.901	0.927	10.118	4.58491e-24	1.00809e-22	0.0036	0.01	0.0051	0.0051	TRUE	0.07
MD00G1071300	1127	1288	1298	1369	1773	1480	1111	1415	994	1037	1010	1100	1269	1438	1422	1135	1297	1182	1064.75	1049	1376	1205	1.263	0.337	2.01	0.044388	0.0732499	0.0376	0.0101	0.0266	0.0266	TRUE	0.6416	1.115	0.156	1.021	0.307201	0.404217	0.0376	0.0101	0.0266	0.0266	TRUE	0.6416
MD00G1071500	0	0	0	0	0	0	0	0	0	0	0	0	0	0	0	0	0	0	0	0	0	0	1	0	NA	NA	NA	NA	NA	NA	NA	NA	NA	1	0	NA	NA	NA	NA	NA	NA	NA	NA	NA
MD00G1071600	0	0	0	0	0	0	1	0	0	0	0	0	0	0	0	1	0	0	0.19	0	0	0	1	0	0	1	NA	0	8.1904	12	12	TRUE	0.243	1.074	0.103	0.283	0.776832	NA	0	8.1904	12	12	TRUE	0.243
MD00G1071700	1	0	0	0	1	2	0	0	1	1	0	0	0	1	2	0	0	1	0.55	0	1	0	1.198	0.26	0.678	0.497556	NA	0	2.8269	2.3864	2.3864	TRUE	0.1628	1.027	0.039	0.117	0.907222	NA	0	2.8269	2.3864	2.3864	TRUE	0.1628
MD00G1071800	81	81	72	52	63	39	50	51	37	75	64	61	48	51	37	51	47	44	53.73	67	45	47	0.735	-0.444	-2.315	0.0206099	0.0371331	0	0.0377	0.0222	0.0222	TRUE	0.3096	0.774	-0.37	-2.071	0.0383976	0.0696965	0	0.0377	0.0222	0.0222	TRUE	0.3096
MD00G1071900	300	382	371	336	341	332	176	219	170	276	300	314	311	277	319	180	201	202	281.89	297	302	194	1.016	0.023	0.181	0.856673	0.895651	0.0086	0.0142	0.0105	0.0105	TRUE	0.1874	0.679	-0.559	-4.311	1.62783e-05	6.07152e-05	0.0086	0.0142	0.0105	0.0105	TRUE	0.1874
MD00G1072100	341	369	347	418	485	435	534	607	441	314	289	294	387	393	418	545	556	524	346.13	299	399	542	1.322	0.403	4.482	7.4115e-06	2.54582e-05	0	0.0131	0.0037	0.0037	TRUE	0.0103	1.793	0.842	9.343	9.34831e-21	1.67595e-19	0	0.0131	0.0037	0.0037	TRUE	0.0103
MD00G1072200	80	102	108	0	1	2	0	1	2	74	80	92	0	1	2	0	1	2	37.53	82	1	1	0.014	-6.161	-7.565	3.86575e-14	3.53925e-13	0	0.0503	0.0292	0.0292	TRUE	0.2052	0.016	-5.962	-7.33	2.29694e-13	2.29694e-12	0	0.0503	0.0292	0.0292	TRUE	0.2052
MD00G1072300	4158	4437	5037	3339	4247	3377	2883	3552	3040	3827	3481	4269	3094	3444	3244	2944	3256	3614	3051.76	3859	3261	3271	0.869	-0.202	-1.13	0.258485	0.338243	0.0508	0.0091	0.0331	0.0331	TRUE	1.0665	0.882	-0.181	-1.109	0.267505	0.361044	0.0508	0.0091	0.0331	0.0331	TRUE	1.0665
MD00G1072400	0	0	0	0	0	0	0	0	0	0	0	0	0	0	0	0	0	0	0	0	0	0	1	0	NA	NA	NA	NA	NA	NA	NA	NA	NA	1	0	NA	NA	NA	NA	NA	NA	NA	NA	NA
MD00G1072500	1275	1544	1420	2412	2693	2460	2449	2577	1904	1174	1211	1203	2235	2184	2363	2501	2362	2263	1695.42	1196	2261	2375	1.873	0.905	11.844	2.32351e-32	6.9094e-31	0.0021	0.0095	0.0038	0.0038	TRUE	0.0458	1.972	0.98	12.743	3.41267e-37	1.42347e-35	0.0021	0.0095	0.0038	0.0038	TRUE	0.0458
MD00G1072600	5	7	2	0	0	0	0	0	0	5	5	2	0	0	0	0	0	0	0.98	4	0	0	0.357	-1.487	-2.099	0.0357742	0.0606676	0	1.6002	2.313	2.313	TRUE	0.07	0.409	-1.291	-2.004	0.0450697	0.0801093	0	1.6002	2.313	2.313	TRUE	0.07
MD00G1072700	10	5	5	4	2	8	3	8	5	9	4	4	4	2	8	3	7	6	5.75	6	5	5	0.885	-0.176	-0.604	0.545849	0.628957	0	0.2807	0.184	0.184	TRUE	0.3545	0.984	-0.023	-0.094	0.924813	0.948859	0	0.2807	0.184	0.184	TRUE	0.3545
MD00G1072800	16	12	9	0	0	1	0	0	0	15	9	8	0	0	1	0	0	0	4.04	11	0	0	0.056	-4.151	-3.799	0.000145483	0.00040622	0	0.3961	0.2268	0.2268	TRUE	0.2361	0.031	-4.997	-4.367	1.25897e-05	4.78515e-05	0	0.3961	0.2268	0.2268	TRUE	0.2361
MD00G1072900	2	6	6	0	0	0	0	0	0	2	5	5	0	0	0	0	0	0	1.2	4	0	0	0.202	-2.308	-2.606	0.00915419	0.0179512	0	1.3141	1.0963	1.0963	TRUE	0.2266	0.246	-2.022	-2.487	0.0128708	0.0266507	0	1.3141	1.0963	1.0963	TRUE	0.2266
MD00G1073000	2	3	3	0	0	0	0	0	0	2	2	3	0	0	0	0	0	0	0.76	2	0	0	0.424	-1.238	-1.974	0.0483411	0.0789559	0	2.0676	1.4364	1.4364	TRUE	0.1052	0.483	-1.051	-1.865	0.0621306	0.10559	0	2.0676	1.4364	1.4364	TRUE	0.1052
MD00G1073100	1	3	7	0	0	0	0	0	0	1	2	6	0	0	0	0	0	0	0.89	3	0	0	0.404	-1.309	-1.991	0.046426	0.0761949	0	1.7664	2.0967	2.0967	TRUE	0.1462	0.458	-1.126	-1.893	0.0583166	0.100061	0	1.7664	2.0967	2.0967	TRUE	0.1462
MD00G1073200	643	889	705	405	467	463	908	900	699	592	697	597	375	379	445	927	825	831	744.82	629	400	861	0.65	-0.622	-5.315	1.06884e-07	4.75223e-07	0.0086	0.0107	0.0092	0.0092	TRUE	0.0998	1.334	0.415	3.755	0.00017312	0.000540944	0.0086	0.0107	0.0092	0.0092	TRUE	0.0998
MD00G1073300	177	157	191	272	318	264	196	207	169	163	123	162	252	258	254	200	190	201	185.57	149	255	197	1.659	0.731	5.593	2.23189e-08	1.08893e-07	0.0035	0.017	0.0092	0.0092	TRUE	0.1316	1.279	0.355	2.818	0.00482597	0.011095	0.0035	0.017	0.0092	0.0092	TRUE	0.1316
MD00G1073400	187	254	235	162	170	130	218	247	178	172	199	199	150	138	125	223	226	212	270.67	190	138	220	0.737	-0.441	-3.809	0.000139622	0.000390995	0	0.0144	0.0054	0.0054	TRUE	0.0362	1.141	0.191	1.793	0.0730129	0.121258	0	0.0144	0.0054	0.0054	TRUE	0.0362
MD00G1073500	0	0	0	0	0	0	0	0	0	0	0	0	0	0	0	0	0	0	0	0	0	0	1	0	NA	NA	NA	NA	NA	NA	NA	NA	NA	1	0	NA	NA	NA	NA	NA	NA	NA	NA	NA
MD00G1073700	0	0	0	0	0	0	0	0	0	0	0	0	0	0	0	0	0	0	0	0	0	0	1	0	NA	NA	NA	NA	NA	NA	NA	NA	NA	1	0	NA	NA	NA	NA	NA	NA	NA	NA	NA
MD00G1073900	43	50	55	42	57	49	27	27	36	40	39	47	39	46	47	28	25	43	39.98	42	44	32	1.042	0.059	0.288	0.773067	0.82724	0.0148	0.0477	0.0311	0.0311	TRUE	0.2505	0.821	-0.285	-1.476	0.139947	0.210572	0.0148	0.0477	0.0311	0.0311	TRUE	0.2505
MD00G1074000	1666	2047	1807	2352	2683	2270	1876	1930	1453	1534	1606	1531	2180	2176	2181	1916	1769	1727	1682.69	1557	2179	1804	1.371	0.456	3.897	9.75605e-05	0.000280323	0.0115	0.0096	0.0107	0.0107	TRUE	0.2479	1.141	0.19	1.703	0.0886353	0.143238	0.0115	0.0096	0.0107	0.0107	TRUE	0.2479
MD00G1074100	448	545	500	660	627	562	506	602	444	412	428	424	612	509	540	517	552	528	534.06	421	554	532	1.294	0.372	3.489	0.000484066	0.00122966	0.0056	0.0116	0.0073	0.0073	TRUE	0.1011	1.239	0.309	2.973	0.0029459	0.00712695	0.0056	0.0116	0.0073	0.0073	TRUE	0.1011
MD00G1074600	0	1	0	0	0	0	0	0	0	0	1	0	0	0	0	0	0	0	0.07	0	0	0	0.948	-0.076	-0.2	0.841337	NA	0	23.9269	12	12	TRUE	0.1785	0.963	-0.055	-0.153	0.878411	NA	0	23.9269	12	12	TRUE	0.1785
MD00G1074700	0	0	0	0	1	0	0	0	0	0	0	0	0	1	0	0	0	0	0.07	0	0	0	1.065	0.09	0.236	0.813237	NA	0	23.1429	12	12	TRUE	0.1698	1	0	0	1	NA	0	23.1429	12	12	TRUE	0.1698
MD00G1075000	26	36	30	22	28	24	20	26	17	24	28	25	20	23	23	20	24	20	19.71	26	22	21	0.892	-0.165	-0.735	0.462102	0.54915	0	0.088	0.0355	0.0355	TRUE	0.257	0.894	-0.162	-0.816	0.414317	0.514294	0	0.088	0.0355	0.0355	TRUE	0.257
MD00G1075100	412	475	524	736	834	697	644	730	451	379	373	444	682	676	670	658	669	536	494.29	399	676	621	1.66	0.731	6.565	5.20438e-11	3.44403e-10	0.0062	0.0118	0.008	0.008	TRUE	0.0814	1.521	0.605	5.483	4.19307e-08	2.30042e-07	0.0062	0.0118	0.008	0.008	TRUE	0.0814
MD00G1075200	1	2	2	0	0	0	1	0	0	1	2	2	0	0	0	1	0	0	0.51	2	0	0	0.623	-0.683	-1.413	0.157789	NA	0	3.0776	2.1303	2.1303	TRUE	0.2059	0.799	-0.323	-0.877	0.380681	NA	0	3.0776	2.1303	2.1303	TRUE	0.2059
MD00G1075300	103	101	96	112	109	93	56	80	41	95	79	81	104	88	89	57	73	49	91.53	85	94	60	1.089	0.122	0.754	0.450655	0.538085	0.0081	0.0257	0.0158	0.0158	TRUE	0.1803	0.757	-0.401	-2.449	0.0143065	0.0292467	0.0081	0.0257	0.0158	0.0158	TRUE	0.1803
MD00G1075400	36	30	24	51	63	47	85	88	70	33	24	20	47	51	45	87	81	83	203.81	26	48	84	1.748	0.806	4.028	5.63045e-05	0.000168385	0	0.0163	0.011	0.011	TRUE	0.1972	3.172	1.666	7.906	2.6501e-15	3.1462e-14	0	0.0163	0.011	0.011	TRUE	0.1972
MD00G1075500	721	847	677	615	590	559	326	369	285	664	664	574	570	479	537	333	338	339	548.37	634	529	337	0.848	-0.237	-1.69	0.0910536	0.137276	0.0181	0.0115	0.016	0.016	TRUE	0.0658	0.55	-0.861	-5.751	8.85891e-09	5.32734e-08	0.0181	0.0115	0.016	0.016	TRUE	0.0658
MD00G1075600	0	0	0	0	0	0	0	0	0	0	0	0	0	0	0	0	0	0	0	0	0	0	1	0	NA	NA	NA	NA	NA	NA	NA	NA	NA	1	0	NA	NA	NA	NA	NA	NA	NA	NA	NA
MD00G1075700	3788	4487	3818	2160	2766	2137	1776	2114	1356	3487	3520	3236	2002	2243	2053	1814	1938	1612	3488.45	3414	2099	1788	0.633	-0.659	-5.072	3.9432e-07	1.62639e-06	0.0147	0.0091	0.0134	0.0134	TRUE	0.0289	0.538	-0.895	-6.726	1.74793e-11	1.44268e-10	0.0147	0.0091	0.0134	0.0134	TRUE	0.0289
MD00G1075800	445	614	499	405	430	398	441	450	380	410	482	423	375	349	382	450	413	452	447.65	438	369	438	0.846	-0.241	-2.59	0.00959593	0.0187327	0	0.0121	0.0046	0.0046	TRUE	0.0452	0.998	-0.003	-0.033	0.973493	0.985357	0	0.0121	0.0046	0.0046	TRUE	0.0452
MD00G1076000	47	62	52	78	116	57	41	49	42	43	49	44	72	94	55	42	45	50	50.1	45	74	46	1.505	0.59	2.909	0.0036293	0.00774813	0	0.0398	0.0271	0.0271	TRUE	0.0606	1.001	0.002	0.01	0.992352	0.999293	0	0.0398	0.0271	0.0271	TRUE	0.0606
MD00G1076100	3	4	3	2	1	3	6	4	3	3	3	3	2	1	3	6	4	4	3.92	3	2	5	0.856	-0.224	-0.725	0.468572	0.555511	0	0.4077	0.1702	0.1702	TRUE	0.0942	1.169	0.225	0.851	0.395004	0.495	0	0.4077	0.1702	0.1702	TRUE	0.0942
MD00G1076200	46	47	54	27	35	29	30	24	18	42	37	46	25	28	28	31	22	21	26.7	42	27	25	0.714	-0.487	-2.254	0.0241822	0.0428265	0	0.0672	0.0273	0.0273	TRUE	0.1343	0.675	-0.568	-2.637	0.00837255	0.0181741	0	0.0672	0.0273	0.0273	TRUE	0.1343
MD00G1076300	8265	9946	9279	6155	7235	5965	5245	5691	4478	7608	7802	7864	5704	5868	5730	5356	5217	5323	5122.66	7758	5767	5299	0.754	-0.407	-3.914	9.07342e-05	0.000262187	0.009	0.0089	0.0085	0.0085	TRUE	0.1985	0.699	-0.517	-5.027	4.9776e-07	2.35731e-06	0.009	0.0089	0.0085	0.0085	TRUE	0.1985
MD00G1076400	3209	3372	3547	1975	1997	1939	2139	2360	2048	2954	2645	3006	1830	1620	1863	2184	2163	2434	1983.52	2868	1771	2260	0.65	-0.621	-3.701	0.000214379	0.000580804	0.0348	0.0094	0.0251	0.0251	TRUE	0.6882	0.825	-0.278	-1.828	0.0675181	0.113325	0.0348	0.0094	0.0251	0.0251	TRUE	0.6882
MD00G1076500	0	1	0	0	0	0	0	0	0	0	1	0	0	0	0	0	0	0	0.07	0	0	0	0.948	-0.076	-0.2	0.841337	NA	0	23.9269	12	12	TRUE	0.1785	0.963	-0.055	-0.153	0.878411	NA	0	23.9269	12	12	TRUE	0.1785
MD00G1076700	538	638	573	35	31	23	11	11	15	495	500	486	32	25	22	11	10	18	201.96	494	26	13	0.054	-4.205	-23.123	2.73381e-118	9.61734e-116	0	0.0164	0.0062	0.0062	TRUE	0.175	0.026	-5.249	-20.533	1.08661e-93	2.47071e-91	0	0.0164	0.0062	0.0062	TRUE	0.175
MD00G1076800	462	552	424	346	381	359	325	345	207	425	433	359	321	309	345	332	316	246	323.76	406	325	298	0.823	-0.282	-1.784	0.0744328	0.115161	0.0254	0.0135	0.021	0.021	TRUE	0.3121	0.774	-0.369	-2.438	0.0147882	0.0301126	0.0254	0.0135	0.021	0.021	TRUE	0.3121
MD00G1076900	1	3	1	0	2	1	1	1	1	1	2	1	0	2	1	1	1	1	1.18	1	1	1	0.898	-0.156	-0.474	0.635417	0.708871	0	1.3308	0.5822	0.5822	TRUE	0.1648	0.94	-0.089	-0.309	0.757094	0.818557	0	1.3308	0.5822	0.5822	TRUE	0.1648
MD00G1077000	25	34	26	23	25	23	17	11	20	23	27	22	21	20	22	17	10	24	17.96	24	21	17	0.923	-0.116	-0.489	0.624548	0.699507	0	0.0957	0.0536	0.0536	TRUE	0.1306	0.812	-0.301	-1.367	0.171469	0.249886	0	0.0957	0.0536	0.0536	TRUE	0.1306
MD00G1077100	0	1	1	0	0	1	1	0	1	0	1	1	0	0	1	1	0	1	0.4	1	0	1	0.924	-0.114	-0.309	0.757324	NA	0	3.9156	2.8105	2.8105	TRUE	0.2449	1.037	0.053	0.157	0.874948	NA	0	3.9156	2.8105	2.8105	TRUE	0.2449
MD00G1077200	0	0	0	0	0	0	0	0	0	0	0	0	0	0	0	0	0	0	0	0	0	0	1	0	NA	NA	NA	NA	NA	NA	NA	NA	NA	1	0	NA	NA	NA	NA	NA	NA	NA	NA	NA
MD00G1077300	14	17	15	138	206	149	202	259	160	13	13	13	128	167	143	206	237	190	473.69	13	146	211	11.059	3.467	13.136	2.0488e-39	8.7115e-38	0	0.0119	0.0153	0.0153	TRUE	0.0168	16.023	4.002	15.235	2.08154e-52	1.55865e-50	0	0.0119	0.0153	0.0153	TRUE	0.0168
MD00G1077400	198	221	201	100	169	127	441	550	398	182	173	170	93	137	122	450	504	473	802.99	175	117	476	0.7	-0.514	-3.219	0.00128749	0.00300874	0.0204	0.0106	0.0169	0.0169	TRUE	0.0113	2.656	1.41	8.562	1.1131e-17	1.60198e-16	0.0204	0.0106	0.0169	0.0169	TRUE	0.0113
MD00G1077500	2	1	0	1	4	1	0	1	0	2	1	0	1	3	1	0	1	0	0.72	1	2	0	1.147	0.198	0.563	0.57371	0.65418	0	2.1718	1.534	1.534	TRUE	0.116	0.87	-0.2	-0.595	0.55214	0.644343	0	2.1718	1.534	1.534	TRUE	0.116
MD00G1077600	1	2	3	0	0	0	0	1	0	1	2	3	0	0	0	0	1	0	1.1	2	0	0	0.447	-1.163	-1.961	0.0498533	0.0811307	0	1.427	0.8522	0.8522	TRUE	0.3606	0.706	-0.502	-1.277	0.201734	0.286098	0	1.427	0.8522	0.8522	TRUE	0.3606
MD00G1077700	1	0	0	0	0	0	0	0	0	1	0	0	0	0	0	0	0	0	1.1	0	0	0	0.906	-0.142	-0.391	0.696013	0.761481	0	1.4341	1.6752	1.6752	TRUE	0.0666	0.934	-0.099	-0.299	0.765256	0.825276	0	1.4341	1.6752	1.6752	TRUE	0.0666
MD00G1077800	32	33	24	203	330	239	449	575	374	29	26	20	188	268	230	459	527	445	187.59	25	229	477	8.966	3.164	14.44	2.89027e-47	1.68931e-45	0.0156	0.017	0.0162	0.0162	TRUE	0.1741	18.735	4.228	19.493	1.2618e-84	2.37638e-82	0.0156	0.017	0.0162	0.0162	TRUE	0.1741
MD00G1077900	64	71	69	16	21	16	19	18	21	59	56	58	15	17	15	19	17	25	38.09	58	16	20	0.289	-1.792	-6.8	1.04577e-11	7.46777e-11	0	0.0497	0.0187	0.0187	TRUE	0.0941	0.368	-1.443	-5.69	1.27198e-08	7.50387e-08	0	0.0497	0.0187	0.0187	TRUE	0.0941
MD00G1078000	29	35	26	10	18	8	15	18	19	27	27	22	9	15	8	15	17	23	21.03	25	11	18	0.502	-0.994	-3.241	0.00118962	0.00280216	0	0.083	0.049	0.049	TRUE	0.2914	0.813	-0.298	-1.376	0.16875	0.246531	0	0.083	0.049	0.049	TRUE	0.2914
MD00G1078100	733	791	799	659	721	570	703	922	725	675	621	677	611	585	548	718	845	862	738.64	658	581	808	0.894	-0.162	-1.197	0.23136	0.307605	0.0161	0.0107	0.0145	0.0145	TRUE	0.3598	1.196	0.258	2.012	0.0441898	0.0787948	0.0161	0.0107	0.0145	0.0145	TRUE	0.3598
MD00G1078200	131	195	162	364	433	402	326	347	277	121	153	137	337	351	386	333	318	329	226.72	137	358	327	2.563	1.358	9.881	5.03286e-23	9.06645e-22	0.0043	0.0155	0.0098	0.0098	TRUE	0.2414	2.338	1.225	8.829	1.05174e-18	1.64167e-17	0.0043	0.0155	0.0098	0.0098	TRUE	0.2414
MD00G1078300	749	771	833	772	913	704	798	859	736	689	605	706	715	740	676	815	787	875	722.51	667	710	826	1.064	0.09	1.009	0.312737	0.397287	0.0028	0.0108	0.005	0.005	TRUE	0.04	1.223	0.29	3.316	0.000913916	0.00247225	0.0028	0.0108	0.005	0.005	TRUE	0.04
MD00G1078400	448	549	488	471	571	449	484	529	392	412	431	414	436	463	431	494	485	466	466.94	419	443	482	1.057	0.081	0.975	0.329619	0.415127	0	0.012	0.0033	0.0033	TRUE	0.0147	1.142	0.191	2.347	0.0189399	0.0375105	0	0.012	0.0033	0.0033	TRUE	0.0147
MD00G1078500	190	199	209	242	207	228	175	229	197	175	156	177	224	168	219	179	210	234	182.29	169	204	208	1.175	0.233	1.51	0.130969	0.188413	0.0176	0.0172	0.0174	0.0174	TRUE	0.1845	1.181	0.24	1.657	0.0975018	0.155199	0.0176	0.0172	0.0174	0.0174	TRUE	0.1845
MD00G1078600	956	1156	1013	1217	1207	1111	1127	1195	933	880	907	859	1128	979	1067	1151	1095	1109	1126.93	882	1058	1118	1.191	0.252	2.823	0.00475234	0.00991466	0.0038	0.01	0.0053	0.0053	TRUE	0.069	1.251	0.323	3.682	0.000231186	0.000704438	0.0038	0.01	0.0053	0.0053	TRUE	0.069
MD00G1078900	336	368	350	282	316	263	219	277	207	309	289	297	261	256	253	224	254	246	252.19	298	257	241	0.869	-0.202	-1.829	0.067433	0.105628	0.0017	0.0148	0.0068	0.0068	TRUE	0.1181	0.826	-0.276	-2.541	0.0110586	0.0232955	0.0017	0.0148	0.0068	0.0068	TRUE	0.1181
MD00G1079100	66	85	80	37	53	38	25	37	25	61	67	68	34	43	37	26	34	30	61.87	65	38	30	0.627	-0.674	-3.531	0.000413767	0.00106277	0	0.0339	0.0164	0.0164	TRUE	0.0419	0.489	-1.033	-4.767	1.86702e-06	8.1134e-06	0	0.0339	0.0164	0.0164	TRUE	0.0419
MD00G1079200	216	239	216	51	48	45	14	18	15	199	187	183	47	39	43	14	17	18	101.87	190	43	16	0.233	-2.1	-9.84	7.5511e-23	1.34684e-21	0	0.024	0.0214	0.0214	TRUE	0.2444	0.087	-3.525	-12.79	1.87438e-37	7.95856e-36	0	0.024	0.0214	0.0214	TRUE	0.2444
MD00G1079300	24	54	36	10	12	9	4	5	8	22	42	31	9	10	9	4	5	10	18.46	32	9	6	0.333	-1.585	-4.396	1.10076e-05	3.68734e-05	0	0.0933	0.0569	0.0569	TRUE	0.1006	0.207	-2.272	-5.198	2.01488e-07	1.00879e-06	0	0.0933	0.0569	0.0569	TRUE	0.1006
MD00G1079400	6	13	11	5	1	3	4	4	1	6	10	9	5	1	3	4	4	1	11.26	8	3	3	0.493	-1.021	-2.496	0.0125775	0.0238418	0	0.1475	0.094	0.094	TRUE	0.3168	0.574	-0.801	-2.209	0.0271989	0.0515526	0	0.1475	0.094	0.094	TRUE	0.3168
MD00G1079500	3	8	6	3	4	0	0	1	2	3	6	5	3	3	0	0	1	2	4.9	5	2	1	0.702	-0.51	-1.468	0.141993	0.201969	0	0.3277	0.1779	0.1779	TRUE	0.3365	0.501	-0.998	-2.131	0.0331217	0.0612896	0	0.3277	0.1779	0.1779	TRUE	0.3365
MD00G1079600	1	0	0	0	0	0	0	0	0	1	0	0	0	0	0	0	0	0	0.08	0	0	0	0.948	-0.076	-0.2	0.841337	NA	0	20.3917	12	12	TRUE	0.251	0.963	-0.055	-0.153	0.878411	NA	0	20.3917	12	12	TRUE	0.251
MD00G1079700	3	2	3	2	0	1	0	0	1	3	2	3	2	0	1	0	0	1	0.91	3	1	0	0.812	-0.301	-0.837	0.402415	0.490635	0	1.7338	1.0998	1.0998	TRUE	0.2229	0.64	-0.644	-1.471	0.141195	0.212082	0	1.7338	1.0998	1.0998	TRUE	0.2229
MD00G1079900	81	127	77	208	224	218	128	136	121	75	100	65	193	182	209	131	125	144	124.52	80	195	133	2.341	1.227	6.825	8.8057e-12	6.33542e-11	0.0151	0.0212	0.0177	0.0177	TRUE	0.2403	1.555	0.637	3.775	0.000159777	0.000502918	0.0151	0.0212	0.0177	0.0177	TRUE	0.2403
MD00G1080000	1	1	4	68	96	71	37	43	33	1	1	3	63	78	68	38	39	39	47.07	2	70	39	36.915	5.206	8.706	3.15586e-18	4.03296e-17	0	0.0418	0.0173	0.0173	TRUE	0.3473	20.638	4.367	7.239	4.51664e-13	4.37583e-12	0	0.0418	0.0173	0.0173	TRUE	0.3473
MD00G1080100	6	6	6	9	14	10	44	44	37	6	5	5	8	11	10	45	40	44	25.22	5	10	43	1.522	0.606	2.034	0.0419318	0.0697293	0	0.0706	0.0281	0.0281	TRUE	0.0434	8.002	3	7.441	1.00031e-13	1.03644e-12	0	0.0706	0.0281	0.0281	TRUE	0.0434
MD00G1080200	0	0	0	0	0	0	1	0	1	0	0	0	0	0	0	1	0	1	1.02	0	0	1	1	0	0	1	1	0	1.5429	1.1814	1.1814	TRUE	0.161	1.337	0.419	1.086	0.277344	0.3719	0	1.5429	1.1814	1.1814	TRUE	0.161
MD00G1080300	4	4	2	1	3	3	2	4	1	4	3	2	1	2	3	2	4	1	4.54	3	2	2	0.9	-0.153	-0.507	0.61219	0.688686	0	0.3529	0.1781	0.1781	TRUE	0.0674	0.95	-0.074	-0.291	0.771396	0.829954	0	0.3529	0.1781	0.1781	TRUE	0.0674
MD00G1080400	33	39	39	1	5	3	1	1	0	30	31	33	1	4	3	1	1	0	9.15	31	3	1	0.095	-3.39	-5.789	7.0918e-09	3.67602e-08	0	0.1794	0.0902	0.0902	TRUE	0.1958	0.031	-5.007	-5.06	4.19937e-07	2.00659e-06	0	0.1794	0.0902	0.0902	TRUE	0.1958
MD00G1080500	0	0	0	0	0	0	0	0	0	0	0	0	0	0	0	0	0	0	0	0	0	0	1	0	NA	NA	NA	NA	NA	NA	NA	NA	NA	1	0	NA	NA	NA	NA	NA	NA	NA	NA	NA
MD00G1080600	1	0	0	0	0	0	2	1	3	1	0	0	0	0	0	2	1	4	0.62	0	0	2	0.914	-0.129	-0.348	0.727915	NA	0	2.5286	2.6353	2.6353	TRUE	0.0947	1.432	0.518	1.219	0.223011	NA	0	2.5286	2.6353	2.6353	TRUE	0.0947
MD00G1080700	1430	1491	1492	651	698	585	494	554	395	1316	1170	1264	603	566	562	504	508	470	990.04	1250	577	494	0.468	-1.096	-10.678	1.28752e-26	2.92754e-25	0.0056	0.0102	0.0067	0.0067	TRUE	0.101	0.399	-1.325	-12.599	2.14713e-36	8.76774e-35	0.0056	0.0102	0.0067	0.0067	TRUE	0.101
MD00G1080800	2970	3330	3103	1551	1751	1569	2008	2343	1730	2734	2612	2630	1437	1420	1507	2051	2148	2056	2488.65	2659	1455	2085	0.551	-0.86	-13.151	1.6745e-39	7.16902e-38	0.0012	0.0093	0.0027	0.0027	TRUE	0.022	0.79	-0.34	-5.343	9.14966e-08	4.80077e-07	0.0012	0.0093	0.0027	0.0027	TRUE	0.022
MD00G1080900	360	410	354	338	331	298	294	319	249	331	322	300	313	268	286	300	292	296	250.76	318	289	296	0.915	-0.129	-1.227	0.219782	0.294342	0	0.0149	0.006	0.006	TRUE	0.1066	0.938	-0.092	-0.899	0.368786	0.468756	0	0.0149	0.006	0.006	TRUE	0.1066
MD00G1081000	0	0	0	2	7	0	4	3	3	0	0	0	2	6	0	4	3	4	1.62	0	3	4	3.522	1.816	2.384	0.0171479	0.0314858	0	0.9758	0.8887	0.8887	TRUE	0.2023	5.079	2.345	2.657	0.0078803	0.0171995	0	0.9758	0.8887	0.8887	TRUE	0.2023
MD00G1081100	0	0	0	0	0	0	0	0	0	0	0	0	0	0	0	0	0	0	0	0	0	0	1	0	NA	NA	NA	NA	NA	NA	NA	NA	NA	1	0	NA	NA	NA	NA	NA	NA	NA	NA	NA
MD00G1081200	0	0	1	3	3	3	5	4	0	0	0	1	3	2	3	5	4	0	1.63	0	3	3	2.193	1.133	1.966	0.0492786	0.0803076	0	0.9693	0.6792	0.6792	TRUE	0.2782	2.304	1.204	2.054	0.0399367	0.072149	0	0.9693	0.6792	0.6792	TRUE	0.2782
MD00G1081300	17	12	12	7	7	6	7	7	4	16	9	10	6	6	6	7	6	5	9.08	12	6	6	0.681	-0.555	-1.787	0.0738792	0.114428	0	0.1808	0.0997	0.0997	TRUE	0.4359	0.725	-0.465	-1.67	0.0948503	0.151723	0	0.1808	0.0997	0.0997	TRUE	0.4359
MD00G1081400	2	1	3	11	13	12	3	9	3	2	1	3	10	11	12	3	8	4	4.98	2	11	5	4.126	2.045	3.324	0.000887656	0.00214508	0	0.3226	0.1702	0.1702	TRUE	0.3839	1.601	0.679	1.849	0.0645	0.108984	0	0.3226	0.1702	0.1702	TRUE	0.3839
MD00G1081500	0	0	0	0	0	0	0	0	0	0	0	0	0	0	0	0	0	0	0.65	0	0	0	1	0	0	1	NA	0	2.3973	3.7899	3.7899	TRUE	0.0117	1	0	0	1	NA	0	2.3973	3.7899	3.7899	TRUE	0.0117
MD00G1081600	656	735	662	685	725	668	468	516	385	604	577	561	635	588	642	478	473	458	600.34	581	622	470	1.066	0.092	0.823	0.410528	0.498752	0.0078	0.0112	0.0088	0.0088	TRUE	0.1775	0.826	-0.276	-2.513	0.0119803	0.0250053	0.0078	0.0112	0.0088	0.0088	TRUE	0.1775
MD00G1081700	0	0	0	0	0	0	0	1	0	0	0	0	0	0	0	0	1	0	0.08	0	0	0	1	0	0	1	NA	0	20.4757	12	12	TRUE	0.1613	1.074	0.103	0.283	0.77683	NA	0	20.4757	12	12	TRUE	0.1613
MD00G1081800	15	12	9	10	14	3	66	54	44	14	9	8	9	11	3	67	50	52	19.45	10	8	56	0.871	-0.2	-0.754	0.450592	0.538045	0	0.089	0.0643	0.0643	TRUE	0.4364	5.113	2.354	6.169	6.89175e-10	4.74946e-09	0	0.089	0.0643	0.0643	TRUE	0.4364
MD00G1081900	4	2	3	1	0	1	0	0	0	4	2	3	1	0	1	0	0	0	1.13	3	1	0	0.677	-0.563	-1.342	0.179513	0.247304	0	1.396	0.8376	0.8376	TRUE	0.162	0.344	-1.538	-2.256	0.0240884	0.0463376	0	1.396	0.8376	0.8376	TRUE	0.162
MD00G1082000	2	3	5	0	2	0	1	0	0	2	2	4	0	2	0	1	0	0	128.76	3	1	0	0.519	-0.946	-1.969	0.049007	0.0799245	0	0.0208	0.0362	0.0362	TRUE	0.3372	0.393	-1.346	-2.281	0.0225416	0.0437405	0	0.0208	0.0362	0.0362	TRUE	0.3372
MD00G1082100	180	189	181	136	178	138	125	184	113	166	148	153	126	144	133	128	169	134	160.34	156	134	144	0.879	-0.187	-1.241	0.214543	0.288248	0.0127	0.0184	0.0148	0.0148	TRUE	0.0708	0.938	-0.092	-0.656	0.511591	0.607304	0.0127	0.0184	0.0148	0.0148	TRUE	0.0708
MD00G1082200	0	0	0	0	0	0	0	0	0	0	0	0	0	0	0	0	0	0	0.46	0	0	0	1	0	0	1	NA	0	3.4427	5.046	5.046	TRUE	0.0876	1	0	0	1	NA	0	3.4427	5.046	5.046	TRUE	0.0876
MD00G1082300	62	74	73	13	16	15	27	33	20	57	58	62	12	13	14	28	30	24	123.6	59	13	27	0.233	-2.101	-7.689	1.4803e-14	1.40673e-13	0	0.0213	0.016	0.016	TRUE	0.0151	0.498	-1.005	-4.582	4.61645e-06	1.8817e-05	0	0.0213	0.016	0.016	TRUE	0.0151
MD00G1082400	13	10	6	0	0	1	1	4	0	12	8	5	0	0	1	1	4	0	13.02	8	0	2	0.07	-3.842	-3.714	0.00020393	0.00055447	0.0308	0.1288	0.0928	0.0928	TRUE	0.4827	0.341	-1.551	-2.89	0.00385136	0.00907993	0.0308	0.1288	0.0928	0.0928	TRUE	0.4827
MD00G1082500	5	5	4	0	0	0	1	0	0	5	4	3	0	0	0	1	0	0	2.41	4	0	0	0.099	-3.34	-3.265	0.00109605	0.00260065	0	0.6561	0.3152	0.3152	TRUE	0.2059	0.314	-1.672	-2.432	0.0150189	0.0305256	0	0.6561	0.3152	0.3152	TRUE	0.2059
MD00G1082600	0	0	0	0	0	0	0	0	0	0	0	0	0	0	0	0	0	0	0	0	0	0	1	0	NA	NA	NA	NA	NA	NA	NA	NA	NA	1	0	NA	NA	NA	NA	NA	NA	NA	NA	NA
MD00G1082700	5	2	8	0	0	0	0	0	0	5	2	7	0	0	0	0	0	0	1.15	5	0	0	0.225	-2.149	-2.495	0.0125787	0.0238428	0	1.3624	1.4646	1.4646	TRUE	0.0279	0.271	-1.881	-2.385	0.0170711	0.0342266	0	1.3624	1.4646	1.4646	TRUE	0.0279
MD00G1082800	7	3	6	5	11	1	4	1	1	6	2	5	5	9	1	4	1	1	7.54	4	5	2	1.031	0.044	0.153	0.878086	0.912713	0.1856	0.2161	0.2029	0.2029	TRUE	0.1144	0.755	-0.405	-1.319	0.187045	0.2687	0.1856	0.2161	0.2029	0.2029	TRUE	0.1144
MD00G1082900	0	2	1	0	0	0	1	0	1	0	2	1	0	0	0	1	0	1	0.49	1	0	1	0.754	-0.407	-0.976	0.329184	NA	0	3.1896	2.516	2.516	TRUE	0.1374	0.982	-0.027	-0.082	0.934998	NA	0	3.1896	2.516	2.516	TRUE	0.1374
MD00G1083000	521	529	578	1200	1377	1128	1171	1457	942	480	415	490	1112	1117	1084	1196	1336	1120	755.56	462	1104	1217	2.367	1.243	11.654	2.18713e-31	6.24487e-30	0.0056	0.0107	0.0071	0.0071	TRUE	0.1141	2.618	1.388	12.948	2.41263e-38	1.06722e-36	0.0056	0.0107	0.0071	0.0071	TRUE	0.1141
MD00G1083100	611	799	645	925	1204	970	718	835	562	562	627	547	857	976	932	733	765	668	697.84	579	922	722	1.553	0.635	5.258	1.45637e-07	6.35853e-07	0.0102	0.0109	0.0105	0.0105	TRUE	0.1786	1.22	0.287	2.484	0.0130031	0.0268919	0.0102	0.0109	0.0105	0.0105	TRUE	0.1786
MD00G1083200	0	0	0	0	0	0	0	0	0	0	0	0	0	0	0	0	0	0	0	0	0	0	1	0	NA	NA	NA	NA	NA	NA	NA	NA	NA	1	0	NA	NA	NA	NA	NA	NA	NA	NA	NA
MD00G1083300	0	0	1	0	0	0	0	0	0	0	0	1	0	0	0	0	0	0	0.07	0	0	0	0.948	-0.076	-0.2	0.841337	NA	0	22.1474	12	12	TRUE	0.2117	0.963	-0.055	-0.153	0.878411	NA	0	22.1474	12	12	TRUE	0.2117
MD00G1083400	0	0	0	6	1	5	7	10	5	0	0	0	6	1	5	7	9	6	3.5	0	4	7	9.982	3.319	3.265	0.00109374	0.00259599	0	0.4553	0.2767	0.2767	TRUE	0.4768	26.13	4.708	4.082	4.46387e-05	0.000154514	0	0.4553	0.2767	0.2767	TRUE	0.4768
MD00G1083500	1	1	0	9	8	13	27	32	30	1	1	0	8	6	12	28	29	36	23.66	1	9	31	9.971	3.318	3.694	0.000220464	0.000596295	0	0.0747	0.0422	0.0422	TRUE	0.1748	38.757	5.276	5.441	5.28698e-08	2.85851e-07	0	0.0747	0.0422	0.0422	TRUE	0.1748
MD00G1083600	35	54	41	0	0	0	0	0	0	32	42	35	0	0	0	0	0	0	9.44	36	0	0	0.008	-6.983	-6.235	4.51767e-10	2.69888e-09	0	0.1742	0.1129	0.1129	TRUE	0.294	0.009	-6.794	-6.068	1.29135e-09	8.62362e-09	0	0.1742	0.1129	0.1129	TRUE	0.294
MD00G1083700	472	514	461	384	408	335	383	458	416	434	403	391	356	331	322	391	420	494	431.15	409	336	435	0.831	-0.267	-2.414	0.015777	0.0292219	0.0055	0.0122	0.0076	0.0076	TRUE	0.0789	1.055	0.077	0.733	0.463682	0.562501	0.0055	0.0122	0.0076	0.0076	TRUE	0.0789
MD00G1083800	815	941	972	1716	2139	1632	1365	1592	1087	750	738	824	1590	1735	1568	1394	1459	1292	1022.34	771	1631	1382	2.092	1.065	11.156	6.71059e-29	1.69538e-27	0.0045	0.0102	0.006	0.006	TRUE	0.1074	1.768	0.822	8.631	6.08856e-18	8.97401e-17	0.0045	0.0102	0.006	0.006	TRUE	0.1074
MD00G1083900	468	627	551	466	466	437	434	457	347	431	492	467	432	378	420	443	419	412	461.75	463	410	425	0.891	-0.167	-1.466	0.142693	0.202814	0.0072	0.012	0.0087	0.0087	TRUE	0.1508	0.925	-0.112	-1.022	0.306703	0.403705	0.0072	0.012	0.0087	0.0087	TRUE	0.1508
MD00G1084000	391	523	415	473	521	448	292	314	273	360	410	352	438	423	430	298	288	325	354.01	374	430	304	1.142	0.192	1.958	0.0501921	0.0816293	0.0017	0.013	0.0054	0.0054	TRUE	0.0429	0.822	-0.282	-2.855	0.0043072	0.0100253	0.0017	0.013	0.0054	0.0054	TRUE	0.0429
MD00G1084200	0	0	0	0	0	2	2	2	0	0	0	0	0	0	2	2	2	0	0.61	0	1	1	1.238	0.308	0.766	0.443874	NA	0	2.5914	3.2272	3.2272	TRUE	0.4873	1.438	0.524	1.211	0.225945	NA	0	2.5914	3.2272	3.2272	TRUE	0.4873
MD00G1084300	106	150	168	40	66	41	74	97	70	98	118	142	37	54	39	76	89	83	61.87	119	43	83	0.383	-1.384	-6.328	2.47721e-10	1.51983e-09	0.0162	0.0339	0.0242	0.0242	TRUE	0.2159	0.746	-0.422	-2.44	0.0146702	0.0299066	0.0162	0.0339	0.0242	0.0242	TRUE	0.2159
MD00G1084400	17	22	20	8	11	5	7	10	4	16	17	17	7	9	5	7	9	5	12.41	17	7	7	0.544	-0.877	-2.711	0.00671178	0.0135596	0	0.1346	0.0586	0.0586	TRUE	0.1138	0.563	-0.829	-2.613	0.00897975	0.0193535	0	0.1346	0.0586	0.0586	TRUE	0.1138
MD00G1084500	0	0	0	0	0	0	0	0	0	0	0	0	0	0	0	0	0	0	0	0	0	0	1	0	NA	NA	NA	NA	NA	NA	NA	NA	NA	1	0	NA	NA	NA	NA	NA	NA	NA	NA	NA
MD00G1084600	535	637	604	387	417	365	354	410	315	492	500	512	359	338	351	361	376	374	347.02	501	349	370	0.704	-0.506	-5.73	1.00271e-08	5.10666e-08	0	0.0131	0.0039	0.0039	TRUE	0.057	0.751	-0.414	-4.735	2.19264e-06	9.41216e-06	0	0.0131	0.0039	0.0039	TRUE	0.057
MD00G1084700	2	0	1	4	0	2	4	2	1	2	0	1	4	0	2	4	2	1	1.71	1	2	2	1.21	0.275	0.801	0.423384	0.511409	0	0.9222	0.5934	0.5934	TRUE	0.0988	1.287	0.364	1.089	0.276177	0.370509	0	0.9222	0.5934	0.5934	TRUE	0.0988
MD00G1084800	0	0	0	0	0	0	0	0	0	0	0	0	0	0	0	0	0	0	0	0	0	0	1	0	NA	NA	NA	NA	NA	NA	NA	NA	NA	1	0	NA	NA	NA	NA	NA	NA	NA	NA	NA
MD00G1084900	0	0	0	0	0	0	0	0	0	0	0	0	0	0	0	0	0	0	0	0	0	0	1	0	NA	NA	NA	NA	NA	NA	NA	NA	NA	1	0	NA	NA	NA	NA	NA	NA	NA	NA	NA
MD00G1085000	65	76	70	24	34	39	31	33	27	60	60	59	22	28	37	32	30	32	31.6	60	29	31	0.535	-0.903	-3.942	8.07897e-05	0.0002354	0	0.0581	0.0275	0.0275	TRUE	0.2643	0.584	-0.777	-3.489	0.000485144	0.00139197	0	0.0581	0.0275	0.0275	TRUE	0.2643
MD00G1085100	860	1019	922	870	1086	797	698	765	599	792	799	781	806	881	766	713	701	712	693.17	791	818	709	1.033	0.047	0.571	0.568329	0.649474	0.0017	0.0109	0.0043	0.0043	TRUE	0.0553	0.902	-0.149	-1.808	0.070563	0.117715	0.0017	0.0109	0.0043	0.0043	TRUE	0.0553
MD00G1085200	505	568	536	405	412	376	468	519	450	465	446	454	375	334	361	478	476	535	421.72	455	357	496	0.793	-0.335	-3.339	0.000842001	0.00204494	0.0026	0.0123	0.0058	0.0058	TRUE	0.0823	1.082	0.114	1.192	0.233127	0.322512	0.0026	0.0123	0.0058	0.0058	TRUE	0.0823
MD00G1085300	0	0	0	2	3	1	0	0	0	0	0	0	2	2	1	0	0	0	0.44	0	2	0	1.456	0.542	1.171	0.241444	NA	0	3.5844	5.1348	5.1348	TRUE	0.0345	1	0	0	1	NA	0	3.5844	5.1348	5.1348	TRUE	0.0345
MD00G1085400	0	1	0	1	0	0	0	0	1	0	1	0	1	0	0	0	0	1	0.44	0	0	0	1.008	0.011	0.032	0.974833	NA	0	3.5652	2.5757	2.5757	TRUE	0.2148	1.027	0.039	0.114	0.909151	NA	0	3.5652	2.5757	2.5757	TRUE	0.2148
MD00G1085500	2607	3017	2761	1387	1733	1508	1610	2080	1521	2400	2367	2340	1285	1406	1449	1644	1907	1808	2070.84	2369	1380	1786	0.588	-0.767	-10.44	1.62792e-25	3.45898e-24	0.0018	0.0094	0.0035	0.0035	TRUE	0.0296	0.762	-0.393	-5.471	4.46623e-08	2.44095e-07	0.0018	0.0094	0.0035	0.0035	TRUE	0.0296
MD00G1085600	580	604	700	845	999	822	620	695	512	534	474	593	783	810	790	633	637	609	493.77	534	794	626	1.468	0.554	5.782	7.36241e-09	3.80571e-08	0	0.0118	0.0058	0.0058	TRUE	0.0825	1.161	0.216	2.296	0.0216688	0.0422521	0	0.0118	0.0058	0.0058	TRUE	0.0825
MD00G1085700	0	0	0	2	11	5	3	6	2	0	0	0	2	9	5	3	6	2	2.83	0	5	4	15.647	3.968	3.565	0.000364518	0.000946183	0	0.5603	0.3724	0.3724	TRUE	0.0487	9.112	3.188	3.153	0.00161592	0.0041417	0	0.5603	0.3724	0.3724	TRUE	0.0487
MD00G1085800	0	0	0	0	0	1	0	0	0	0	0	0	0	0	1	0	0	0	0.08	0	0	0	1.065	0.09	0.236	0.813237	NA	0	19.5408	12	12	TRUE	0.2449	1	0	0	1	NA	0	19.5408	12	12	TRUE	0.2449
MD00G1085900	423	510	448	243	299	235	475	509	401	389	400	380	225	243	226	485	467	477	342.78	390	231	476	0.602	-0.731	-7.948	1.89116e-15	1.939e-14	0	0.0132	0.0034	0.0034	TRUE	0.0109	1.208	0.272	3.267	0.00108862	0.00289527	0	0.0132	0.0034	0.0034	TRUE	0.0109
MD00G1086100	676	694	784	843	1026	815	758	960	758	622	544	664	781	832	783	774	880	901	639.52	610	799	852	1.267	0.341	2.143	0.0321163	0.0550679	0.03	0.0111	0.0224	0.0224	TRUE	0.5188	1.322	0.403	2.65	0.00805859	0.0175611	0.03	0.0111	0.0224	0.0224	TRUE	0.5188
MD00G1086200	1267	1377	1262	1536	1695	1476	1267	1303	974	1166	1080	1070	1423	1375	1418	1294	1194	1158	1133.46	1105	1405	1215	1.246	0.318	2.412	0.0158663	0.0293669	0.015	0.01	0.0142	0.0142	TRUE	0.3475	1.085	0.118	0.952	0.341267	0.440081	0.015	0.01	0.0142	0.0142	TRUE	0.3475
MD00G1086300	0	0	0	0	0	0	3	4	3	0	0	0	0	0	0	3	4	4	1.21	0	0	4	1	0	0	1	1	0	1.3023	1.0998	1.0998	TRUE	0.1121	4.308	2.107	2.522	0.0116568	0.0244162	0	1.3023	1.0998	1.0998	TRUE	0.1121
MD00G1086500	831	938	923	852	991	777	760	939	702	765	736	782	790	804	746	776	861	834	667.74	761	780	824	1.024	0.034	0.342	0.732109	0.791909	0.0044	0.011	0.0068	0.0068	TRUE	0.1664	1.076	0.105	1.088	0.276443	0.370811	0.0044	0.011	0.0068	0.0068	TRUE	0.1664
MD00G1086800	1299	1519	1443	2090	2554	1982	999	1141	759	1196	1192	1223	1937	2071	1904	1020	1046	902	1066.17	1204	1971	989	1.622	0.698	9.118	7.66517e-20	1.11047e-18	0	0.0101	0.0038	0.0038	TRUE	0.0343	0.831	-0.267	-3.475	0.000510392	0.0014572	0	0.0101	0.0038	0.0038	TRUE	0.0343
MD00G1086900	172	160	174	233	242	194	143	167	117	158	126	147	216	196	186	146	153	139	125.37	144	199	146	1.354	0.437	3.225	0.00125774	0.0029468	0.0021	0.0211	0.0105	0.0105	TRUE	0.3059	1.017	0.024	0.185	0.853035	0.89451	0.0021	0.0211	0.0105	0.0105	TRUE	0.3059
MD00G1087000	83	107	86	76	104	77	141	163	124	76	84	73	70	84	74	144	149	147	123.89	78	76	147	0.984	-0.023	-0.157	0.875619	0.910765	0	0.0212	0.0082	0.0082	TRUE	0.0442	1.825	0.868	5.944	2.78737e-09	1.78348e-08	0	0.0212	0.0082	0.0082	TRUE	0.0442
MD00G1087100	5	7	4	8	11	6	11	10	15	5	5	3	7	9	6	11	9	18	6.3	4	7	13	1.269	0.344	1.152	0.249379	0.327996	0	0.2567	0.1244	0.1244	TRUE	0.4758	1.885	0.915	2.468	0.0136	0.0279711	0	0.2567	0.1244	0.1244	TRUE	0.4758
MD00G1087200	41	32	46	0	0	0	0	0	0	38	25	39	0	0	0	0	0	0	8.49	34	0	0	0.009	-6.86	-6.051	1.4379e-09	8.13274e-09	0.0412	0.1929	0.149	0.149	TRUE	0.2044	0.01	-6.67	-5.887	3.92513e-09	2.46369e-08	0.0412	0.1929	0.149	0.149	TRUE	0.2044
MD00G1087300	468	610	534	608	691	548	485	538	435	431	479	453	563	560	526	495	493	517	547.77	454	550	502	1.202	0.266	2.973	0.00294782	0.00641294	0.0018	0.0115	0.0045	0.0045	TRUE	0.0537	1.097	0.133	1.506	0.13197	0.200365	0.0018	0.0115	0.0045	0.0045	TRUE	0.0537
MD00G1087400	630	644	597	681	838	699	641	736	601	580	505	506	631	680	671	655	675	714	776.95	530	661	681	1.237	0.306	3.378	0.000730498	0.0017959	0.0029	0.0106	0.0049	0.0049	TRUE	0.0385	1.266	0.34	3.806	0.000141118	0.000448389	0.0029	0.0106	0.0049	0.0049	TRUE	0.0385
MD00G1087500	346	461	395	380	383	344	390	399	370	318	362	335	352	311	330	398	366	440	367.25	338	331	401	0.978	-0.032	-0.319	0.749958	0.807517	0.0022	0.0129	0.0056	0.0056	TRUE	0.039	1.167	0.222	2.274	0.0229939	0.0445009	0.0022	0.0129	0.0056	0.0056	TRUE	0.039
MD00G1087600	3	7	12	13	13	11	9	17	10	3	5	10	12	11	11	9	16	12	9.78	6	11	12	1.374	0.458	1.527	0.126812	0.183281	0.0391	0.1685	0.1073	0.1073	TRUE	0.4713	1.43	0.516	1.799	0.0719791	0.119783	0.0391	0.1685	0.1073	0.1073	TRUE	0.4713
MD00G1087700	491	611	554	716	804	661	804	900	626	452	479	470	664	652	635	821	825	744	667.38	467	650	797	1.376	0.461	5.191	2.09664e-07	8.97116e-07	0.0021	0.011	0.0045	0.0045	TRUE	0.06	1.684	0.752	8.423	3.68348e-17	5.08542e-16	0.0021	0.011	0.0045	0.0045	TRUE	0.06
MD00G1087800	0	0	0	0	0	0	0	1	2	0	0	0	0	0	0	0	1	2	0.4	0	0	1	1	0	0	1	NA	0	3.949	6.1792	6.1792	TRUE	0.0942	1.268	0.342	0.859	0.390221	NA	0	3.949	6.1792	6.1792	TRUE	0.0942
MD00G1087900	3	0	1	0	0	0	1	1	0	3	0	1	0	0	0	1	1	0	1.39	1	0	1	0.636	-0.653	-1.39	0.164388	0.229228	2.4454	1.1368	1.6438	1.6438	TRUE	1.1502	0.91	-0.135	-0.42	0.674702	0.75034	2.4454	1.1368	1.6438	1.6438	TRUE	1.1502
MD00G1088100	297	326	282	486	468	442	2111	2782	1393	273	256	239	450	380	425	2156	2550	1656	742.05	256	418	2121	1.575	0.656	4.613	3.96742e-06	1.41683e-05	0.0158	0.0107	0.0142	0.0142	TRUE	0.0156	8.236	3.042	20.402	1.59827e-92	3.59033e-90	0.0158	0.0107	0.0142	0.0142	TRUE	0.0156
MD00G1088300	0	0	0	0	0	0	0	0	0	0	0	0	0	0	0	0	0	0	0	0	0	0	1	0	NA	NA	NA	NA	NA	NA	NA	NA	NA	1	0	NA	NA	NA	NA	NA	NA	NA	NA	NA
MD00G1088400	0	0	0	0	0	0	0	0	0	0	0	0	0	0	0	0	0	0	0.12	0	0	0	1	0	0	1	NA	0	12.7934	12	12	TRUE	0.32	1	0	0	1	NA	0	12.7934	12	12	TRUE	0.32
MD00G1088500	0	0	0	0	0	0	0	0	0	0	0	0	0	0	0	0	0	0	0.11	0	0	0	1	0	0	1	NA	0	14.7583	12	12	TRUE	0.243	1	0	0	1	NA	0	14.7583	12	12	TRUE	0.243
MD00G1088600	256	261	264	187	213	208	239	202	193	236	205	224	173	173	200	244	185	229	258.14	222	182	219	0.833	-0.263	-2.164	0.0304461	0.0524987	0.004	0.0147	0.0079	0.0079	TRUE	0.1103	0.991	-0.013	-0.111	0.911782	0.939081	0.004	0.0147	0.0079	0.0079	TRUE	0.1103
MD00G1089100	1057	1181	996	493	453	475	734	783	740	973	926	844	457	367	456	750	718	880	1465.72	914	427	783	0.485	-1.044	-6.271	3.58862e-10	2.16509e-09	0.0263	0.0097	0.0207	0.0207	TRUE	0.0759	0.879	-0.185	-1.3	0.19377	0.276596	0.0263	0.0097	0.0207	0.0207	TRUE	0.0759
MD00G1089200	749	771	829	511	648	484	528	635	456	689	605	703	474	526	465	539	582	542	630.37	666	488	554	0.749	-0.418	-3.491	0.000480638	0.00122149	0.0099	0.0111	0.0102	0.0102	TRUE	0.0651	0.85	-0.234	-2.051	0.0402321	0.0726165	0.0099	0.0111	0.0102	0.0102	TRUE	0.0651
MD00G1089400	48	71	37	51	49	42	12	13	10	44	56	31	47	40	40	12	12	12	26.28	44	42	12	0.976	-0.034	-0.16	0.873082	0.908886	0.0213	0.0681	0.0432	0.0432	TRUE	0.1256	0.301	-1.733	-5.116	3.11344e-07	1.51922e-06	0.0213	0.0681	0.0432	0.0432	TRUE	0.1256
MD00G1089500	51	59	47	111	109	91	120	132	106	47	46	40	103	88	87	123	121	126	82.45	44	93	123	1.989	0.992	5.422	5.8922e-08	2.71931e-07	0	0.0276	0.0135	0.0135	TRUE	0.1762	2.696	1.431	7.577	3.54515e-14	3.84298e-13	0	0.0276	0.0135	0.0135	TRUE	0.1762
MD00G1089600	492	642	591	729	916	755	681	732	662	453	504	501	676	743	725	695	671	787	663.38	486	715	718	1.45	0.536	5.621	1.90231e-08	9.36835e-08	0.0034	0.011	0.0056	0.0056	TRUE	0.0408	1.446	0.533	5.621	1.89393e-08	1.08804e-07	0.0034	0.011	0.0056	0.0056	TRUE	0.0408
MD00G1089700	2080	2196	2180	3294	3879	3496	2326	2672	1819	1915	1723	1848	3053	3146	3358	2375	2450	2162	2309.84	1829	3186	2329	1.725	0.787	10.043	9.8761e-24	1.88571e-22	0.0026	0.0093	0.0042	0.0042	TRUE	0.0238	1.262	0.335	4.352	1.34863e-05	5.10459e-05	0.0026	0.0093	0.0042	0.0042	TRUE	0.0238
MD00G1089800	1	0	3	0	0	0	0	0	0	1	0	3	0	0	0	0	0	0	0.29	1	0	0	0.835	-0.261	-0.651	0.514905	NA	0	5.4266	12	12	TRUE	0.0151	0.855	-0.227	-0.603	0.546564	NA	0	5.4266	12	12	TRUE	0.0151
MD00G1089900	0	0	0	2	0	0	17	18	12	0	0	0	2	0	0	17	17	14	4.56	0	1	16	1.387	0.472	1.172	0.24113	0.318721	0	0.3514	0.2293	0.2293	TRUE	0.4874	58.458	5.869	5.052	4.36712e-07	2.08141e-06	0	0.3514	0.2293	0.2293	TRUE	0.4874
MD00G1090000	54	75	60	62	63	67	72	79	62	50	59	51	57	51	64	74	72	74	63.11	53	57	73	1.065	0.091	0.512	0.60876	0.685738	0	0.0334	0.0175	0.0175	TRUE	0.2004	1.285	0.362	2.16	0.0307612	0.057449	0	0.0334	0.0175	0.0175	TRUE	0.2004
MD00G1090300	8	19	5	0	0	0	0	0	0	7	15	4	0	0	0	0	0	0	2.6	9	0	0	0.043	-4.534	-3.728	0.000193114	0.000527136	0.9306	0.6094	0.6646	0.6646	TRUE	0.1053	0.052	-4.278	-3.593	0.000327009	0.00096833	0.9306	0.6094	0.6646	0.6646	TRUE	0.1053
MD00G1090500	35	46	40	11	3	3	6	3	5	32	36	34	10	2	3	6	3	6	14.4	34	5	5	0.166	-2.592	-5.643	1.66783e-08	8.27478e-08	0	0.1172	0.0697	0.0697	TRUE	0.804	0.158	-2.663	-5.501	3.78024e-08	2.08806e-07	0	0.1172	0.0697	0.0697	TRUE	0.804
MD00G1090600	0	0	0	1	0	0	0	0	0	0	0	0	1	0	0	0	0	0	0.08	0	0	0	1.065	0.09	0.236	0.813237	NA	0	20.255	12	12	TRUE	0.2275	1	0	0	1	NA	0	20.255	12	12	TRUE	0.2275
MD00G1090900	497	586	562	513	615	511	418	504	365	457	460	476	475	499	491	427	462	434	462.28	464	488	441	1.05	0.07	0.867	0.385831	0.473663	0	0.012	0.0032	0.0032	TRUE	0.0143	0.953	-0.07	-0.858	0.390735	0.490754	0	0.012	0.0032	0.0032	TRUE	0.0143
MD00G1091100	504	515	578	880	996	880	690	811	540	464	404	490	816	808	845	705	743	642	623.5	453	823	697	1.786	0.837	7.933	2.14432e-15	2.18833e-14	0.0053	0.0111	0.007	0.007	TRUE	0.067	1.507	0.592	5.676	1.37792e-08	8.10454e-08	0.0053	0.0111	0.007	0.007	TRUE	0.067
MD00G1091200	324	380	363	237	263	219	217	209	213	298	298	308	220	213	210	222	192	253	248.21	301	214	222	0.736	-0.443	-3.012	0.00259618	0.00572104	0.016	0.0149	0.0156	0.0156	TRUE	0.2075	0.768	-0.381	-2.707	0.00679163	0.0150472	0.016	0.0149	0.0156	0.0156	TRUE	0.2075
MD00G1091400	142	176	142	155	221	193	142	164	102	131	138	120	144	179	185	145	150	121	154.31	130	169	139	1.277	0.353	2.634	0.00843621	0.0166827	0	0.0188	0.0095	0.0095	TRUE	0.0939	1.063	0.088	0.684	0.493674	0.590828	0	0.0188	0.0095	0.0095	TRUE	0.0939
MD00G1091500	7	6	6	4	5	3	3	1	2	6	5	5	4	4	3	3	1	2	3.53	5	4	2	0.846	-0.241	-0.801	0.423061	0.511111	0	0.4515	0.1951	0.1951	TRUE	0.3478	0.687	-0.542	-1.615	0.106304	0.167035	0	0.4515	0.1951	0.1951	TRUE	0.3478
MD00G1091600	368	355	359	380	508	410	295	414	302	339	278	304	352	412	394	301	380	359	353.76	307	386	347	1.237	0.307	2.449	0.01431	0.0267785	0.0095	0.013	0.0107	0.0107	TRUE	0.1167	1.113	0.154	1.284	0.198998	0.282788	0.0095	0.013	0.0107	0.0107	TRUE	0.1167
MD00G1091800	298	315	316	248	269	230	413	549	369	274	247	268	230	218	221	422	503	439	412.76	263	223	455	0.856	-0.225	-2.165	0.0303688	0.0523847	0	0.0124	0.005	0.005	TRUE	0.0534	1.702	0.768	7.621	2.51686e-14	2.76202e-13	0	0.0124	0.005	0.005	TRUE	0.0534
MD00G1091900	0	0	0	0	0	0	0	0	0	0	0	0	0	0	0	0	0	0	0	0	0	0	1	0	NA	NA	NA	NA	NA	NA	NA	NA	NA	1	0	NA	NA	NA	NA	NA	NA	NA	NA	NA
MD00G1092000	54	61	62	0	3	3	5	5	1	50	48	53	0	2	3	5	5	1	17.8	50	2	4	0.04	-4.63	-7.141	9.25794e-13	7.41471e-12	0	0.0965	0.0676	0.0676	TRUE	0.4458	0.081	-3.622	-6.863	6.74202e-12	5.80892e-11	0	0.0965	0.0676	0.0676	TRUE	0.4458
MD00G1092100	146	135	162	9	12	10	19	37	44	134	106	137	8	10	10	19	34	52	54.28	126	9	35	0.076	-3.714	-9.871	5.55388e-23	9.98092e-22	0.0677	0.0374	0.0531	0.0531	TRUE	0.2622	0.296	-1.754	-5.883	4.04056e-09	2.52976e-08	0.0677	0.0374	0.0531	0.0531	TRUE	0.2622
MD00G1092300	9	24	16	35	42	36	27	28	24	8	19	14	32	34	35	28	26	29	19.11	14	34	28	2.131	1.091	3.725	0.000195184	0.000532436	0	0.0904	0.043	0.043	TRUE	0.1782	1.653	0.725	2.748	0.00599474	0.0134665	0	0.0904	0.043	0.043	TRUE	0.1782
MD00G1092400	0	0	0	0	0	0	0	1	2	0	0	0	0	0	0	0	1	2	0.27	0	0	1	1	0	0	1	NA	0	5.7045	12	12	TRUE	0.0126	1.186	0.246	0.649	0.516321	NA	0	5.7045	12	12	TRUE	0.0126
MD00G1092500	125	186	135	23	28	21	42	61	38	115	146	114	21	23	20	43	56	45	208.25	125	21	48	0.176	-2.504	-9.817	9.5559e-23	1.69443e-21	0	0.0161	0.0242	0.0242	TRUE	0.0388	0.403	-1.312	-5.975	2.29702e-09	1.48425e-08	0	0.0161	0.0242	0.0242	TRUE	0.0388
MD00G1092600	50	60	40	45	67	60	45	53	33	46	47	34	42	54	58	46	49	39	92.61	42	51	45	1.156	0.209	1.003	0.315812	0.400579	0.0417	0.0255	0.0356	0.0356	TRUE	0.1907	1.037	0.052	0.284	0.776285	0.833554	0.0417	0.0255	0.0356	0.0356	TRUE	0.1907
MD00G1092700	0	0	0	0	0	0	0	0	0	0	0	0	0	0	0	0	0	0	0	0	0	0	1	0	NA	NA	NA	NA	NA	NA	NA	NA	NA	1	0	NA	NA	NA	NA	NA	NA	NA	NA	NA
MD00G1092800	91	92	84	79	85	87	59	55	40	84	72	71	73	69	84	60	50	48	54.75	76	75	53	0.994	-0.008	-0.049	0.961071	0.978254	0	0.0372	0.0162	0.0162	TRUE	0.0813	0.75	-0.415	-2.466	0.013664	0.0280816	0	0.0372	0.0162	0.0162	TRUE	0.0813
MD00G1092900	0	0	0	0	0	1	0	0	0	0	0	0	0	0	1	0	0	0	0.38	0	0	0	1.101	0.139	0.364	0.715637	NA	0	4.0801	3.888	3.888	TRUE	0.2449	1	0	0	1	NA	0	4.0801	3.888	3.888	TRUE	0.2449
MD00G1093000	2	0	1	0	3	3	1	0	1	2	0	1	0	2	3	1	0	1	1.16	1	2	1	1.185	0.245	0.715	0.474902	0.56163	0	1.3623	0.7662	0.7662	TRUE	0.2425	0.963	-0.055	-0.182	0.855306	0.896165	0	1.3623	0.7662	0.7662	TRUE	0.2425
MD00G1093200	25	59	48	30	27	31	26	30	18	23	46	41	28	22	30	27	28	21	29.82	37	27	25	0.78	-0.358	-1.591	0.111543	0.163926	0	0.0611	0.0382	0.0382	TRUE	0.3844	0.777	-0.363	-1.746	0.0808211	0.132429	0	0.0611	0.0382	0.0382	TRUE	0.3844
MD00G1093300	189	221	197	103	97	100	128	152	118	174	173	167	95	79	96	131	139	140	151.34	171	90	137	0.542	-0.883	-6.042	1.52041e-09	8.57086e-09	0	0.019	0.0097	0.0097	TRUE	0.1326	0.822	-0.283	-2.19	0.0285288	0.0537618	0	0.019	0.0097	0.0097	TRUE	0.1326
MD00G1093400	175	230	213	60	84	69	40	43	32	161	180	181	56	68	66	41	39	38	145.34	174	63	39	0.373	-1.421	-8.612	7.18229e-18	8.9068e-17	0	0.0194	0.0111	0.0111	TRUE	0.1122	0.231	-2.111	-11.134	8.59144e-29	2.44561e-27	0	0.0194	0.0111	0.0111	TRUE	0.1122
MD00G1093500	2	5	1	0	0	0	1	1	1	2	4	1	0	0	0	1	1	1	1.86	2	0	1	0.324	-1.626	-2.295	0.021728	0.0389424	0	0.8504	0.7341	0.7341	TRUE	1.106	0.845	-0.244	-0.783	0.433358	0.532662	0	0.8504	0.7341	0.7341	TRUE	1.106
MD00G1093600	2007	2337	2177	1881	2467	1906	1703	1728	1225	1847	1833	1845	1743	2001	1831	1739	1584	1456	1335.67	1842	1858	1593	1.009	0.013	0.138	0.890302	0.922743	0.0042	0.0098	0.0061	0.0061	TRUE	0.336	0.874	-0.195	-2.172	0.0298479	0.0559339	0.0042	0.0098	0.0061	0.0061	TRUE	0.336
MD00G1093700	0	0	0	0	0	0	0	0	0	0	0	0	0	0	0	0	0	0	0	0	0	0	1	0	NA	NA	NA	NA	NA	NA	NA	NA	NA	1	0	NA	NA	NA	NA	NA	NA	NA	NA	NA
MD00G1093800	2	6	5	0	0	0	0	0	0	2	5	4	0	0	0	0	0	0	1.6	4	0	0	0.161	-2.634	-2.822	0.0047798	0.00996748	0	0.988	0.6778	0.6778	TRUE	0.2496	0.199	-2.327	-2.69	0.00715146	0.0157686	0	0.988	0.6778	0.6778	TRUE	0.2496
MD00G1093900	0	0	0	0	0	0	0	0	0	0	0	0	0	0	0	0	0	0	0	0	0	0	1	0	NA	NA	NA	NA	NA	NA	NA	NA	NA	1	0	NA	NA	NA	NA	NA	NA	NA	NA	NA
MD00G1094000	0	0	0	0	0	0	0	0	0	0	0	0	0	0	0	0	0	0	0	0	0	0	1	0	NA	NA	NA	NA	NA	NA	NA	NA	NA	1	0	NA	NA	NA	NA	NA	NA	NA	NA	NA
MD00G1094100	851	869	951	1063	1145	962	812	1136	804	783	682	806	985	929	924	829	1041	956	1600.75	757	946	942	1.238	0.308	3.189	0.00142763	0.00330702	0.0047	0.0096	0.0063	0.0063	TRUE	0.0663	1.227	0.295	3.121	0.00179936	0.00456544	0.0047	0.0096	0.0063	0.0063	TRUE	0.0663
MD00G1094600	43	71	52	53	57	51	45	50	37	40	56	44	49	46	49	46	46	44	39.34	47	48	45	1.024	0.035	0.174	0.862213	0.900034	0.0036	0.0484	0.029	0.029	TRUE	0.8179	0.981	-0.028	-0.158	0.87448	0.910901	0.0036	0.0484	0.029	0.029	TRUE	0.8179
MD00G1094800	0	0	0	0	0	0	0	0	1	0	0	0	0	0	0	0	0	1	0.1	0	0	0	1	0	0	1	NA	0	15.793	12	12	TRUE	0.2804	1.074	0.103	0.283	0.77683	NA	0	15.793	12	12	TRUE	0.2804
MD00G1094900	249	338	248	372	488	362	377	377	259	229	265	210	345	396	348	385	346	308	285.39	235	363	346	1.5	0.585	4.456	8.36845e-06	2.85272e-05	0.0097	0.0141	0.0112	0.0112	TRUE	0.1337	1.421	0.506	3.943	8.03511e-05	0.000265817	0.0097	0.0141	0.0112	0.0112	TRUE	0.1337
MD00G1095000	0	0	0	0	3	0	10	9	6	0	0	0	0	2	0	10	8	7	2.7	0	1	8	1.614	0.691	1.505	0.132316	0.190065	0	0.5879	0.4355	0.4355	TRUE	0.7192	27.605	4.787	4.007	6.14725e-05	0.000207543	0	0.5879	0.4355	0.4355	TRUE	0.7192
MD00G1095100	7	26	11	14	33	30	17	34	26	6	20	9	13	27	29	17	31	31	16.35	12	23	26	1.459	0.545	1.82	0.0688316	0.107566	0.1449	0.1043	0.1252	0.1252	TRUE	0.8625	1.603	0.681	2.24	0.0250734	0.0480046	0.1449	0.1043	0.1252	0.1252	TRUE	0.8625
MD00G1095300	401	444	459	387	439	381	374	443	355	369	348	389	359	356	366	382	406	422	442.27	369	360	403	0.979	-0.031	-0.238	0.811877	0.85874	0.0121	0.0122	0.0121	0.0121	TRUE	0.0789	1.08	0.111	0.906	0.365037	0.464803	0.0121	0.0122	0.0121	0.0121	TRUE	0.0789
MD00G1095400	1	1	1	5	7	8	7	6	6	1	1	1	5	6	8	7	6	7	3.72	1	6	7	3.411	1.77	2.761	0.00576435	0.0118071	0	0.4285	0.1764	0.1764	TRUE	0.134	3.872	1.953	2.884	0.00392822	0.00924186	0	0.4285	0.1764	0.1764	TRUE	0.134
MD00G1095500	0	0	0	0	0	0	0	0	0	0	0	0	0	0	0	0	0	0	0	0	0	0	1	0	NA	NA	NA	NA	NA	NA	NA	NA	NA	1	0	NA	NA	NA	NA	NA	NA	NA	NA	NA
MD00G1095600	123	161	161	114	165	104	97	105	87	113	126	136	106	134	100	99	96	103	93.15	125	113	99	0.915	-0.128	-0.869	0.38495	0.472695	0	0.0254	0.0124	0.0124	TRUE	0.1371	0.824	-0.28	-1.963	0.0496637	0.0871264	0	0.0254	0.0124	0.0124	TRUE	0.1371
MD00G1095700	1488	1797	1536	1885	2037	1745	1695	1883	1339	1370	1410	1302	1747	1652	1676	1731	1726	1592	1761.35	1361	1692	1683	1.233	0.302	3.319	0.000902555	0.00217896	0.0048	0.0095	0.0059	0.0059	TRUE	0.0848	1.221	0.289	3.235	0.00121524	0.00319805	0.0048	0.0095	0.0059	0.0059	TRUE	0.0848
MD00G1095800	182	184	194	147	172	150	135	135	107	168	144	164	136	139	144	138	124	127	134.5	159	140	130	0.892	-0.165	-1.256	0.209108	0.28192	0	0.0202	0.009	0.009	TRUE	0.1478	0.84	-0.252	-1.976	0.0481179	0.0847895	0	0.0202	0.009	0.009	TRUE	0.1478
MD00G1095900	3	5	2	5	3	2	23	33	26	3	4	2	5	2	2	23	30	31	9.7	3	3	28	1.023	0.033	0.115	0.908318	0.937247	0	0.1698	0.0829	0.0829	TRUE	0.1546	8.95	3.162	5.622	1.88549e-08	1.08386e-07	0	0.1698	0.0829	0.0829	TRUE	0.1546
MD00G1096000	323	440	351	803	842	702	658	751	527	297	345	297	744	683	674	672	688	626	856.68	313	700	662	2.188	1.13	8.67	4.32719e-18	5.4643e-17	0.0111	0.0104	0.0109	0.0109	TRUE	0.1928	2.072	1.051	8.027	9.99539e-16	1.23338e-14	0.0111	0.0104	0.0109	0.0109	TRUE	0.1928
MD00G1096100	0	0	0	0	0	0	0	0	0	0	0	0	0	0	0	0	0	0	0	0	0	0	1	0	NA	NA	NA	NA	NA	NA	NA	NA	NA	1	0	NA	NA	NA	NA	NA	NA	NA	NA	NA
MD00G1096200	114	127	110	0	0	1	0	0	0	105	100	93	0	0	1	0	0	0	24.9	99	0	0	0.006	-7.487	-6.864	6.68463e-12	4.86285e-11	0	0.0714	0.0419	0.0419	TRUE	0.2438	0.003	-8.214	-7.49	6.8952e-14	7.27361e-13	0	0.0714	0.0419	0.0419	TRUE	0.2438
MD00G1096400	0	0	0	0	0	0	0	0	0	0	0	0	0	0	0	0	0	0	0	0	0	0	1	0	NA	NA	NA	NA	NA	NA	NA	NA	NA	1	0	NA	NA	NA	NA	NA	NA	NA	NA	NA
MD00G1096500	0	0	0	0	0	0	0	0	0	0	0	0	0	0	0	0	0	0	0	0	0	0	1	0	NA	NA	NA	NA	NA	NA	NA	NA	NA	1	0	NA	NA	NA	NA	NA	NA	NA	NA	NA
MD00G1096600	349	347	451	798	854	733	695	770	542	321	272	382	740	693	704	710	706	644	569.69	325	712	687	2.085	1.06	5.681	1.33762e-08	6.7142e-08	0.0344	0.0114	0.0266	0.0266	TRUE	0.1413	2.016	1.011	5.407	6.40053e-08	3.41844e-07	0.0344	0.0114	0.0266	0.0266	TRUE	0.1413
MD00G1096700	2	1	1	0	2	0	1	3	0	2	1	1	0	2	0	1	3	0	0.97	1	1	1	0.873	-0.196	-0.555	0.578916	0.658686	0	1.6274	1.2065	1.2065	TRUE	0.3112	1.023	0.033	0.112	0.911018	0.938475	0	1.6274	1.2065	1.2065	TRUE	0.3112
MD00G1096800	0	0	0	1	1	0	0	0	0	0	0	0	1	1	0	0	0	0	0.14	0	1	0	1.124	0.168	0.434	0.664508	NA	0	10.8057	12	12	TRUE	0.1091	1	0	0	1	NA	0	10.8057	12	12	TRUE	0.1091
MD00G1096900	365	406	438	300	332	285	296	271	281	336	318	371	278	269	274	302	248	334	245.59	342	274	295	0.816	-0.294	-2.242	0.0249291	0.0439884	0.0095	0.015	0.0119	0.0119	TRUE	0.242	0.878	-0.188	-1.51	0.130955	0.199067	0.0095	0.015	0.0119	0.0119	TRUE	0.242
MD00G1097000	191	282	272	48	40	37	152	133	139	176	221	231	44	32	36	155	122	165	158.67	209	37	147	0.181	-2.463	-12.852	8.37051e-38	3.26844e-36	0.0092	0.0185	0.013	0.013	TRUE	0.127	0.733	-0.448	-3.198	0.00138452	0.00359658	0.0092	0.0185	0.013	0.013	TRUE	0.127
MD00G1097100	37	44	33	25	24	15	7	8	7	34	35	28	23	19	14	7	7	8	18.47	32	19	7	0.675	-0.566	-2.314	0.0206523	0.0372077	0	0.0933	0.0402	0.0402	TRUE	0.1145	0.261	-1.938	-5.083	3.71046e-07	1.7881e-06	0	0.0933	0.0402	0.0402	TRUE	0.1145
MD00G1097200	0	0	0	7	6	2	0	0	0	0	0	0	6	5	2	0	0	0	1.88	0	4	0	9.901	3.308	3.145	0.00165827	0.0037946	0	0.8405	0.5971	0.5971	TRUE	0.052	1	0	0	1	1	0	0.8405	0.5971	0.5971	TRUE	0.052
MD00G1097300	666	817	684	795	841	774	736	761	573	613	641	580	737	682	744	752	698	681	718.26	611	721	710	1.167	0.223	2.045	0.0408069	0.0680449	0.0074	0.0108	0.0084	0.0084	TRUE	0.1056	1.146	0.196	1.857	0.063341	0.107329	0.0074	0.0108	0.0084	0.0084	TRUE	0.1056
MD00G1097400	1	0	3	2	2	0	0	3	1	1	0	3	2	2	0	0	3	1	2.32	1	1	1	1.009	0.012	0.04	0.968444	0.982708	0	0.6825	0.439	0.439	TRUE	0.3357	1.037	0.053	0.19	0.8491	0.891412	0	0.6825	0.439	0.439	TRUE	0.3357
MD00G1097500	139	167	189	121	164	123	126	125	101	128	131	160	112	133	118	129	115	120	155.67	140	121	121	0.883	-0.179	-1.157	0.24746	0.32584	0.0142	0.0187	0.0158	0.0158	TRUE	0.27	0.89	-0.168	-1.157	0.247127	0.338352	0.0142	0.0187	0.0158	0.0158	TRUE	0.27
MD00G1097600	3	1	3	0	0	0	1	0	0	3	1	3	0	0	0	1	0	0	0.67	2	0	0	0.497	-1.007	-1.769	0.076951	NA	0	2.3488	1.7977	1.7977	TRUE	0.2059	0.715	-0.484	-1.196	0.231671	NA	0	2.3488	1.7977	1.7977	TRUE	0.2059
MD00G1097700	1	9	9	0	1	2	0	0	0	1	7	8	0	1	2	0	0	0	2.17	5	1	0	0.487	-1.038	-2.002	0.0452779	0.074537	0	0.7307	0.5817	0.5817	TRUE	0.5636	0.102	-3.287	-3.147	0.00164785	0.00421484	0	0.7307	0.5817	0.5817	TRUE	0.5636
MD00G1097800	21	22	11	23	39	32	26	33	30	19	17	9	21	32	31	27	30	36	20.22	15	28	31	1.558	0.64	2.429	0.0151567	0.0281836	0	0.086	0.049	0.049	TRUE	0.2985	1.677	0.746	2.795	0.0051835	0.0118251	0	0.086	0.049	0.049	TRUE	0.2985
MD00G1098000	1	0	0	0	4	0	1	0	0	1	0	0	0	3	0	1	0	0	0.43	0	1	0	1.167	0.223	0.561	0.574706	NA	12	3.6267	6.3895	6.3895	TRUE	0.9488	1.021	0.03	0.084	0.932842	NA	12	3.6267	6.3895	6.3895	TRUE	0.9488
MD00G1098100	0	0	0	0	0	0	0	0	0	0	0	0	0	0	0	0	0	0	0	0	0	0	1	0	NA	NA	NA	NA	NA	NA	NA	NA	NA	1	0	NA	NA	NA	NA	NA	NA	NA	NA	NA
MD00G1098200	12	12	15	0	0	0	0	1	0	11	9	13	0	0	0	0	1	0	3.25	11	0	0	0.026	-5.245	-4.503	6.71297e-06	2.3202e-05	0	0.4896	0.2692	0.2692	TRUE	0.1512	0.066	-3.931	-3.634	0.000278915	0.000836879	0	0.4896	0.2692	0.2692	TRUE	0.1512
MD00G1098300	132	136	103	3	1	1	7	6	10	122	107	87	3	1	1	7	6	12	29.31	105	2	8	0.017	-5.913	-8.818	1.16036e-18	1.5459e-17	0	0.062	0.0453	0.0453	TRUE	0.1569	0.079	-3.662	-9.348	8.892e-21	1.59876e-19	0	0.062	0.0453	0.0453	TRUE	0.1569
MD00G1098400	329	393	327	398	443	351	407	415	331	303	308	277	369	359	337	416	380	393	411.94	296	355	396	1.185	0.245	2.076	0.0378765	0.0638149	0.0073	0.0124	0.0088	0.0088	TRUE	0.0914	1.303	0.382	3.323	0.00089073	0.00241566	0.0073	0.0124	0.0088	0.0088	TRUE	0.0914
MD00G1098500	258	300	258	199	211	199	247	239	231	237	235	219	184	171	191	252	219	275	236.85	230	182	249	0.804	-0.314	-2.477	0.0132433	0.0249832	0.0062	0.0152	0.0093	0.0093	TRUE	0.0762	1.066	0.092	0.776	0.437832	0.537047	0.0062	0.0152	0.0093	0.0093	TRUE	0.0762
MD00G1098700	2354	2590	2188	1346	1593	1443	1095	1160	786	2167	2032	1854	1247	1292	1386	1118	1063	934	1102.57	2018	1308	1038	0.659	-0.601	-6.048	1.47083e-09	8.30895e-09	0.0056	0.01	0.0071	0.0071	TRUE	0.2226	0.522	-0.937	-9.168	4.82379e-20	8.20617e-19	0.0056	0.01	0.0071	0.0071	TRUE	0.2226
MD00G1099100	674	772	663	489	508	487	480	574	463	620	606	562	453	412	468	490	526	550	559.67	596	444	522	0.764	-0.389	-2.894	0.00379823	0.00808702	0.0148	0.0114	0.0138	0.0138	TRUE	0.3024	0.892	-0.164	-1.303	0.19253	0.27516	0.0148	0.0114	0.0138	0.0138	TRUE	0.3024
MD00G1099200	0	0	0	0	0	0	0	0	0	0	0	0	0	0	0	0	0	0	0	0	0	0	1	0	NA	NA	NA	NA	NA	NA	NA	NA	NA	1	0	NA	NA	NA	NA	NA	NA	NA	NA	NA
MD00G1099300	0	0	0	0	0	0	0	1	1	0	0	0	0	0	0	0	1	1	0.18	0	0	1	1	0	0	1	NA	0	8.9203	12	12	TRUE	0.1256	1.135	0.183	0.495	0.620254	NA	0	8.9203	12	12	TRUE	0.1256
MD00G1099400	213	286	267	121	119	98	201	244	197	196	224	226	112	97	94	205	224	234	432.47	215	101	221	0.48	-1.058	-7.42	1.1717e-13	1.02253e-12	0.008	0.0122	0.0093	0.0093	TRUE	0.0332	1.02	0.029	0.242	0.808682	0.859824	0.008	0.0122	0.0093	0.0093	TRUE	0.0332
MD00G1099500	0	0	0	1	0	0	0	0	0	0	0	0	1	0	0	0	0	0	0.08	0	0	0	1.065	0.09	0.236	0.813237	NA	0	20.255	12	12	TRUE	0.2275	1	0	0	1	NA	0	20.255	12	12	TRUE	0.2275
MD00G1099600	42	58	64	17	19	15	12	19	18	39	45	54	16	15	14	12	17	21	24.37	46	15	17	0.362	-1.467	-4.925	8.44626e-07	3.33045e-06	0	0.0728	0.0377	0.0377	TRUE	0.1132	0.404	-1.307	-4.424	9.69444e-06	3.7559e-05	0	0.0728	0.0377	0.0377	TRUE	0.1132
MD00G1099700	1	1	0	1	0	1	0	0	0	1	1	0	1	0	1	0	0	0	0.3	1	1	0	1.012	0.017	0.045	0.964471	NA	0	5.2317	4.935	4.935	TRUE	0.1459	0.877	-0.19	-0.517	0.605396	NA	0	5.2317	4.935	4.935	TRUE	0.1459
MD00G1099800	3616	3900	3492	4411	4680	4448	2786	3149	2299	3329	3059	2959	4088	3796	4273	2845	2887	2733	2973.53	3116	4052	2822	1.27	0.344	2.478	0.0132044	0.0249185	0.0185	0.0091	0.0166	0.0166	TRUE	0.3989	0.919	-0.121	-0.933	0.35087	0.450348	0.0185	0.0091	0.0166	0.0166	TRUE	0.3989
MD00G1099900	1	2	0	0	0	0	0	0	0	1	2	0	0	0	0	0	0	0	0.21	1	0	0	0.863	-0.212	-0.539	0.590128	NA	0	7.5456	12	12	TRUE	0.0116	0.882	-0.182	-0.491	0.623706	NA	0	7.5456	12	12	TRUE	0.0116
MD00G1100000	205	250	233	153	187	109	142	144	112	189	196	197	142	152	105	145	132	133	168.87	194	133	137	0.708	-0.498	-3.525	0.000424083	0.0010874	0.0074	0.0179	0.0116	0.0116	TRUE	0.1723	0.735	-0.444	-3.238	0.00120544	0.00317607	0.0074	0.0179	0.0116	0.0116	TRUE	0.1723
MD00G1100500	69	68	76	43	66	61	45	39	35	64	53	64	40	54	59	46	36	42	57.97	60	51	41	0.866	-0.207	-1.144	0.252619	0.331684	0	0.0356	0.0188	0.0188	TRUE	0.1422	0.739	-0.436	-2.412	0.0158667	0.0320445	0	0.0356	0.0188	0.0188	TRUE	0.1422
MD00G1100600	738	829	873	278	321	281	217	299	278	679	650	740	258	260	270	222	274	330	398.1	690	263	275	0.39	-1.36	-8.732	2.51287e-18	3.24576e-17	0.0176	0.0126	0.016	0.016	TRUE	0.2437	0.407	-1.297	-8.279	1.23718e-16	1.6412e-15	0.0176	0.0126	0.016	0.016	TRUE	0.2437
MD00G1100700	0	0	0	427	460	437	450	585	382	0	0	0	396	373	420	460	536	454	219.87	0	396	483	1387.77	10.439	9.55	1.29463e-21	2.10908e-20	0.0042	0.0157	0.0093	0.0093	TRUE	0.0548	1687.36	10.721	9.795	1.18294e-22	2.38056e-21	0.0042	0.0157	0.0093	0.0093	TRUE	0.0548
MD00G1100800	0	0	0	0	0	0	0	0	0	0	0	0	0	0	0	0	0	0	0	0	0	0	1	0	NA	NA	NA	NA	NA	NA	NA	NA	NA	1	0	NA	NA	NA	NA	NA	NA	NA	NA	NA
MD00G1101100	328	328	366	233	300	279	195	217	164	302	257	310	216	243	268	199	199	195	196.94	290	242	198	0.847	-0.239	-2.03	0.0423854	0.0703876	0	0.0166	0.0082	0.0082	TRUE	0.0566	0.705	-0.504	-4.212	2.53264e-05	9.16825e-05	0	0.0166	0.0082	0.0082	TRUE	0.0566
MD00G1101200	0	0	0	0	0	0	0	0	0	0	0	0	0	0	0	0	0	0	0	0	0	0	1	0	NA	NA	NA	NA	NA	NA	NA	NA	NA	1	0	NA	NA	NA	NA	NA	NA	NA	NA	NA
MD00G1101300	5	5	10	0	0	0	0	4	3	5	4	8	0	0	0	0	4	4	3.11	6	0	3	0.059	-4.093	-3.675	0.000237527	0.000639016	0	0.5109	0.313	0.313	TRUE	0.4099	0.744	-0.427	-1.351	0.17678	0.256393	0	0.5109	0.313	0.313	TRUE	0.4099
MD00G1101400	2	5	2	6	13	9	15	26	22	2	4	2	6	11	9	15	24	26	80.79	3	9	22	2.356	1.236	2.97	0.00298113	0.00648011	0	0.028	0.0197	0.0197	TRUE	0.1369	7.711	2.947	5.724	1.0396e-08	6.20266e-08	0	0.028	0.0197	0.0197	TRUE	0.1369
MD00G1101500	0	0	0	0	0	0	0	0	0	0	0	0	0	0	0	0	0	0	0.41	0	0	0	1	0	0	1	NA	0	3.8224	5.5814	5.5814	TRUE	0.0304	1	0	0	1	NA	0	3.8224	5.5814	5.5814	TRUE	0.0304
MD00G1101600	0	0	0	27	29	23	21	32	28	0	0	0	25	24	22	21	29	33	15.23	0	24	28	90.333	6.497	5.907	3.48659e-09	1.8791e-08	0	0.1113	0.0626	0.0626	TRUE	0.3714	106.184	6.73	6.109	1.00023e-09	6.77174e-09	0	0.1113	0.0626	0.0626	TRUE	0.3714
MD00G1101700	5	8	13	11	6	4	15	24	19	5	6	11	10	5	4	15	22	23	102.28	7	6	20	0.913	-0.131	-0.509	0.61041	0.687327	0	0.0239	0.0147	0.0147	TRUE	0.3682	2.37	1.245	3.901	9.59026e-05	0.000313318	0	0.0239	0.0147	0.0147	TRUE	0.3682
MD00G1101900	98	103	106	78	83	80	26	38	36	90	81	90	72	67	77	27	35	43	125.5	87	72	35	0.846	-0.241	-1.642	0.100675	0.149766	0	0.0211	0.0084	0.0084	TRUE	0.1433	0.41	-1.286	-6.735	1.64031e-11	1.35896e-10	0	0.0211	0.0084	0.0084	TRUE	0.1433
MD00G1102000	1	0	4	0	0	0	0	0	0	1	0	3	0	0	0	0	0	0	0.54	1	0	0	0.681	-0.555	-1.206	0.227816	NA	0	2.8994	3.5243	3.5243	TRUE	0.0751	0.721	-0.473	-1.126	0.260348	NA	0	2.8994	3.5243	3.5243	TRUE	0.0751
MD00G1102100	122	126	128	111	122	112	110	93	78	112	99	108	103	99	108	112	85	93	142.53	106	103	97	0.972	-0.04	-0.255	0.798736	0.848037	0.0133	0.0196	0.0156	0.0156	TRUE	0.0401	0.926	-0.11	-0.744	0.456807	0.555842	0.0133	0.0196	0.0156	0.0156	TRUE	0.0401
MD00G1102200	349	394	415	10	6	11	36	50	38	321	309	352	9	5	11	37	46	45	100.88	327	8	43	0.025	-5.3	-17.025	5.34323e-65	5.6285e-63	0	0.0241	0.0142	0.0142	TRUE	0.2523	0.132	-2.925	-15.024	5.08501e-51	3.65357e-49	0	0.0241	0.0142	0.0142	TRUE	0.2523
MD00G1102300	1	0	0	0	0	0	0	0	0	1	0	0	0	0	0	0	0	0	0.08	0	0	0	0.948	-0.076	-0.2	0.841337	NA	0	20.3917	12	12	TRUE	0.251	0.963	-0.055	-0.153	0.878411	NA	0	20.3917	12	12	TRUE	0.251
MD00G1102500	2	8	8	50	40	47	64	77	80	2	6	7	46	32	45	65	71	95	32.87	5	41	77	7.62	2.93	6.997	2.61135e-12	1.98486e-11	0	0.0562	0.0399	0.0399	TRUE	0.3002	14.473	3.855	9.219	2.98814e-20	5.17306e-19	0	0.0562	0.0399	0.0399	TRUE	0.3002
MD00G1102700	3411	4453	3839	1992	2246	1793	2493	2667	1952	3140	3493	3254	1846	1822	1722	2546	2445	2320	3371.08	3296	1797	2437	0.55	-0.862	-11.279	1.6692e-29	4.34061e-28	0.0024	0.0091	0.004	0.004	TRUE	0.0332	0.748	-0.419	-5.633	1.77158e-08	1.02359e-07	0.0024	0.0091	0.004	0.004	TRUE	0.0332
MD00G1102900	268	339	271	500	541	438	293	369	268	247	266	230	463	439	421	299	338	319	299.25	248	441	319	1.75	0.807	7.851	4.12502e-15	4.10521e-14	0	0.0138	0.0054	0.0054	TRUE	0.0319	1.263	0.337	3.321	0.000897859	0.00243358	0	0.0138	0.0054	0.0054	TRUE	0.0319
MD00G1103000	0	0	0	0	0	0	0	0	0	0	0	0	0	0	0	0	0	0	0	0	0	0	1	0	NA	NA	NA	NA	NA	NA	NA	NA	NA	1	0	NA	NA	NA	NA	NA	NA	NA	NA	NA
MD00G1103100	0	1	2	2	2	0	1	1	0	0	1	2	2	2	0	1	1	0	1.36	1	1	1	1.079	0.11	0.337	0.736307	0.795575	0	1.1622	0.625	0.625	TRUE	0.2492	0.961	-0.058	-0.193	0.846634	0.889649	0	1.1622	0.625	0.625	TRUE	0.2492
MD00G1103300	306	365	349	265	323	262	273	275	228	282	286	296	246	262	252	279	252	271	358.83	288	253	267	0.892	-0.165	-1.118	0.263538	0.343878	0.0184	0.013	0.0167	0.0167	TRUE	0.0672	0.94	-0.089	-0.647	0.517334	0.612425	0.0184	0.013	0.0167	0.0167	TRUE	0.0672
MD00G1103500	0	0	0	3	7	0	1	1	0	0	0	0	3	6	0	1	1	0	2.44	0	3	1	5.299	2.406	2.739	0.00616857	0.0125491	0	0.6483	0.5419	0.5419	TRUE	0.076	1.37	0.455	1.183	0.236881	0.326917	0	0.6483	0.5419	0.5419	TRUE	0.076
MD00G1103600	0	0	0	0	0	0	0	0	0	0	0	0	0	0	0	0	0	0	0	0	0	0	1	0	NA	NA	NA	NA	NA	NA	NA	NA	NA	1	0	NA	NA	NA	NA	NA	NA	NA	NA	NA
MD00G1103700	0	0	0	0	0	0	0	0	0	0	0	0	0	0	0	0	0	0	0	0	0	0	1	0	NA	NA	NA	NA	NA	NA	NA	NA	NA	1	0	NA	NA	NA	NA	NA	NA	NA	NA	NA
MD00G1103800	356	405	413	487	630	479	481	513	400	328	318	350	451	511	460	491	470	475	419.58	332	474	479	1.389	0.474	3.48	0.00050064	0.00126852	0.0144	0.0123	0.0136	0.0136	TRUE	0.3872	1.387	0.472	3.559	0.000372087	0.0010897	0.0144	0.0123	0.0136	0.0136	TRUE	0.3872
MD00G1103900	142	147	133	147	125	98	116	135	101	131	115	113	136	101	94	118	124	120	185.56	120	110	121	0.934	-0.098	-0.637	0.52419	0.60898	0.0134	0.017	0.0147	0.0147	TRUE	0.123	1.009	0.013	0.093	0.926272	0.949938	0.0134	0.017	0.0147	0.0147	TRUE	0.123
MD00G1104000	1540	1771	1528	1201	1132	1046	1021	1023	981	1418	1389	1295	1113	918	1005	1043	938	1166	1334.06	1367	1012	1049	0.749	-0.417	-4.392	1.12469e-05	3.76176e-05	0.0049	0.0098	0.0063	0.0063	TRUE	0.0563	0.779	-0.36	-3.867	0.000109959	0.000355595	0.0049	0.0098	0.0063	0.0063	TRUE	0.0563
MD00G1104100	408	496	398	542	584	484	368	390	273	376	389	337	502	474	465	376	358	325	392.82	367	480	353	1.283	0.359	2.909	0.00362841	0.00774668	0.0097	0.0126	0.0106	0.0106	TRUE	0.2191	0.966	-0.05	-0.426	0.670433	0.746839	0.0097	0.0126	0.0106	0.0106	TRUE	0.2191
MD00G1104200	993	1212	1053	1088	1361	1162	887	965	717	914	951	892	1008	1104	1116	906	885	852	1031.64	919	1076	881	1.164	0.219	2.473	0.0133938	0.0252453	0.0036	0.0101	0.0052	0.0052	TRUE	0.0614	0.961	-0.057	-0.653	0.513523	0.608977	0.0036	0.0101	0.0052	0.0052	TRUE	0.0614
MD00G1104300	223	283	220	329	351	323	180	250	157	205	222	186	305	285	310	184	229	187	221.27	204	300	200	1.431	0.517	4.326	1.52156e-05	4.98453e-05	0.0034	0.0157	0.0081	0.0081	TRUE	0.0943	0.982	-0.026	-0.224	0.823029	0.871055	0.0034	0.0157	0.0081	0.0081	TRUE	0.0943
MD00G1104400	2	1	0	2	2	1	4	3	6	2	1	0	2	2	1	4	3	7	2	1	2	5	1.147	0.198	0.601	0.547899	0.630805	0	0.7916	0.4671	0.4671	TRUE	0.4061	1.938	0.954	1.984	0.047264	0.0834741	0	0.7916	0.4671	0.4671	TRUE	0.4061
MD00G1104600	22	24	16	18	17	15	18	36	24	20	19	14	17	14	14	18	33	29	15.83	18	15	27	0.905	-0.143	-0.58	0.562049	0.643698	0.0109	0.1074	0.0599	0.0599	TRUE	0.3397	1.287	0.364	1.6	0.109577	0.171362	0.0109	0.1074	0.0599	0.0599	TRUE	0.3397
MD00G1104700	28	35	22	38	38	44	308	348	217	26	27	19	35	31	42	315	319	258	104.12	24	36	297	1.389	0.474	2.345	0.01902	0.0345726	0	0.0236	0.0142	0.0142	TRUE	0.1237	12.267	3.617	16.825	1.59623e-63	1.65342e-61	0	0.0236	0.0142	0.0142	TRUE	0.1237
MD00G1104800	202	243	236	272	279	297	363	348	275	186	191	200	252	226	285	371	319	327	298.77	192	254	339	1.299	0.377	3.256	0.00113144	0.00267711	0.0036	0.0139	0.007	0.007	TRUE	0.0621	1.721	0.784	6.695	2.15544e-11	1.75956e-10	0.0036	0.0139	0.007	0.007	TRUE	0.0621
MD00G1104900	41	61	51	57	60	57	75	76	58	38	48	43	53	49	55	77	70	69	54.32	43	52	72	1.17	0.226	1.279	0.201013	0.272425	0	0.0374	0.0137	0.0137	TRUE	0.043	1.548	0.631	3.559	0.000371669	0.00108856	0	0.0374	0.0137	0.0137	TRUE	0.043
MD00G1105000	156	236	216	74	56	64	36	62	30	144	185	183	69	45	61	37	57	36	95.16	171	58	43	0.359	-1.479	-6.428	1.29246e-10	8.1757e-10	0.0368	0.0251	0.0317	0.0317	TRUE	0.1483	0.265	-1.917	-7.8	6.17037e-15	7.12583e-14	0.0368	0.0251	0.0317	0.0317	TRUE	0.1483
MD00G1105100	0	0	0	0	0	0	0	1	0	0	0	0	0	0	0	0	1	0	0.08	0	0	0	1	0	0	1	NA	0	20.4757	12	12	TRUE	0.1613	1.074	0.103	0.283	0.77683	NA	0	20.4757	12	12	TRUE	0.1613
MD00G1105200	0	0	0	0	0	0	0	1	0	0	0	0	0	0	0	0	1	0	3.83	0	0	0	1	0	0	1	1	0	0.4166	0.4989	0.4989	TRUE	0.7984	1.167	0.223	0.671	0.50227	0.598507	0	0.4166	0.4989	0.4989	TRUE	0.7984
MD00G1105300	165	216	131	387	402	328	174	204	142	152	169	111	359	326	315	178	187	169	195.47	144	333	178	2.198	1.136	5.784	7.30643e-09	3.78097e-08	0.0345	0.0166	0.0272	0.0272	TRUE	0.5945	1.175	0.232	1.418	0.156155	0.230971	0.0345	0.0166	0.0272	0.0272	TRUE	0.5945
MD00G1105400	0	0	1	11	5	3	5	2	2	0	0	1	10	4	3	5	2	2	2.78	0	6	3	7.029	2.813	3.012	0.00259486	0.00571848	0	0.5718	0.3409	0.3409	TRUE	0.5645	2.849	1.511	2.316	0.0205696	0.0403336	0	0.5718	0.3409	0.3409	TRUE	0.5645
MD00G1105500	0	0	0	0	0	0	6	9	9	0	0	0	0	0	0	6	8	11	2.2	0	0	8	1	0	0	1	1	0	0.7207	0.5832	0.5832	TRUE	0.1655	24.242	4.599	3.797	0.00014617	0.000463219	0	0.7207	0.5832	0.5832	TRUE	0.1655
MD00G1105600	1	0	0	2	1	0	0	0	1	1	0	0	2	1	0	0	0	1	0.4	0	1	0	1.162	0.217	0.558	0.576785	NA	0	3.9391	4.0426	4.0426	TRUE	0.0992	1.024	0.035	0.099	0.920903	NA	0	3.9391	4.0426	4.0426	TRUE	0.0992
MD00G1105700	8348	11857	9541	9	11	10	22	23	25	7684	9301	8086	8	9	10	22	21	30	2099.52	8357	9	24	0.001	-9.817	-34.511	5.54312e-261	1.03352e-257	0	0.0094	0.0088	0.0088	TRUE	0.0656	0.003	-8.414	-41.142	0	0	0	0.0094	0.0088	0.0088	TRUE	0.0656
MD00G1105800	1	2	2	0	0	0	6	7	4	1	2	2	0	0	0	6	6	5	1.79	2	0	6	0.46	-1.119	-1.962	0.0497381	0.080975	0	0.882	0.4843	0.4843	TRUE	0.0449	1.722	0.784	1.852	0.063964	0.108208	0	0.882	0.4843	0.4843	TRUE	0.0449
MD00G1106100	59	45	50	13	16	17	12	8	9	54	35	42	12	13	16	12	7	11	17.58	44	14	10	0.351	-1.509	-4.636	3.55723e-06	1.28003e-05	0	0.0976	0.0516	0.0516	TRUE	0.0431	0.251	-1.997	-5.384	7.29994e-08	3.87109e-07	0	0.0976	0.0516	0.0516	TRUE	0.0431
MD00G1106300	19	26	21	20	21	9	20	20	14	17	20	18	19	17	9	20	18	17	13.06	18	15	18	0.868	-0.204	-0.816	0.41435	0.502412	0	0.1283	0.0625	0.0625	TRUE	0.32	0.998	-0.003	-0.017	0.986654	0.99517	0	0.1283	0.0625	0.0625	TRUE	0.32
MD00G1106400	980	1105	1228	1313	1657	1408	990	1380	1033	902	867	1041	1217	1344	1353	1011	1265	1228	1095.73	937	1305	1168	1.352	0.435	3.063	0.00219163	0.00489729	0.0203	0.01	0.0168	0.0168	TRUE	0.3454	1.208	0.272	2.036	0.0417735	0.0750534	0.0203	0.01	0.0168	0.0168	TRUE	0.3454
MD00G1106500	957	1040	961	784	1026	812	712	824	599	881	816	814	727	832	780	727	755	712	870.97	837	780	731	0.934	-0.098	-1.191	0.23373	0.310392	0.0021	0.0104	0.0041	0.0041	TRUE	0.0292	0.881	-0.182	-2.243	0.0249042	0.0477101	0.0021	0.0104	0.0041	0.0041	TRUE	0.0292
MD00G1106600	200	210	212	187	278	183	205	209	131	184	165	180	173	225	176	209	192	156	284.61	176	191	186	1.079	0.11	0.729	0.466272	0.55326	0.0174	0.0141	0.0162	0.0162	TRUE	0.0371	1.046	0.065	0.46	0.645521	0.725831	0.0174	0.0141	0.0162	0.0162	TRUE	0.0371
MD00G1106700	0	1	2	7	13	4	15	7	8	0	1	2	6	11	4	15	6	10	4.7	1	7	10	4.079	2.028	2.902	0.0037045	0.00789782	0	0.3412	0.2338	0.2338	TRUE	0.3212	7.458	2.899	3.468	0.00052512	0.00149513	0	0.3412	0.2338	0.2338	TRUE	0.3212
MD00G1106800	13	10	9	0	0	0	0	0	0	12	8	8	0	0	0	0	0	0	2.29	9	0	0	0.041	-4.599	-3.768	0.00016445	0.000454349	0	0.6924	0.6551	0.6551	TRUE	0.1257	0.049	-4.346	-3.633	0.000280377	0.000841064	0	0.6924	0.6551	0.6551	TRUE	0.1257
MD00G1106900	10	11	10	8	6	6	15	13	12	9	9	8	7	5	6	15	12	14	13.92	9	6	14	0.814	-0.296	-1.064	0.287192	0.369758	0	0.1209	0.0695	0.0695	TRUE	0.0306	1.268	0.343	1.408	0.159119	0.234722	0	0.1209	0.0695	0.0695	TRUE	0.0306
MD00G1107100	104	115	121	211	251	208	141	145	135	96	90	103	196	204	200	144	133	160	119.1	96	200	146	2.019	1.014	7.104	1.21162e-12	9.57025e-12	0	0.0218	0.0092	0.0092	TRUE	0.2547	1.447	0.533	3.857	0.000114983	0.000370845	0	0.0218	0.0092	0.0092	TRUE	0.2547
MD00G1107200	1110	1376	1224	976	1168	1013	832	939	676	1022	1079	1037	904	947	973	850	861	804	931.67	1046	941	838	0.902	-0.148	-2.017	0.0437157	0.0722525	0.0009	0.0103	0.0032	0.0032	TRUE	0.0293	0.809	-0.306	-4.155	3.25158e-05	0.000115305	0.0009	0.0103	0.0032	0.0032	TRUE	0.0293
MD00G1107300	112	114	111	101	98	73	125	133	110	103	89	94	94	79	70	128	122	131	99.18	95	81	127	0.866	-0.208	-1.413	0.157635	0.221032	0	0.0244	0.0097	0.0097	TRUE	0.0836	1.276	0.352	2.568	0.0102192	0.0217236	0	0.0244	0.0097	0.0097	TRUE	0.0836
MD00G1107400	0	0	0	1	2	1	1	0	2	0	0	0	1	2	1	1	0	2	0.58	0	1	1	1.522	0.606	1.305	0.191936	NA	0	2.7247	2.2075	2.2075	TRUE	0.0401	1.447	0.533	1.248	0.212202	NA	0	2.7247	2.2075	2.2075	TRUE	0.0401
MD00G1107500	278	324	310	356	424	297	277	285	244	256	254	263	330	344	285	283	261	290	284.85	258	320	278	1.221	0.288	2.248	0.0246029	0.0434745	0.0092	0.0141	0.0109	0.0109	TRUE	0.1178	1.067	0.094	0.768	0.442509	0.541483	0.0092	0.0141	0.0109	0.0109	TRUE	0.1178
MD00G1107600	335	408	370	247	320	252	228	302	212	308	320	314	229	260	242	233	277	252	258.29	314	244	254	0.786	-0.347	-3.317	0.000909252	0.00219414	0	0.0147	0.0056	0.0056	TRUE	0.0376	0.824	-0.28	-2.735	0.00623931	0.0139503	0	0.0147	0.0056	0.0056	TRUE	0.0376
MD00G1107700	3565	4333	3808	2538	2573	2379	2295	2563	1875	3282	3399	3227	2352	2087	2285	2344	2350	2229	3438.83	3303	2241	2308	0.683	-0.551	-8.691	3.5937e-18	4.57681e-17	0.0011	0.0091	0.0027	0.0027	TRUE	0.0224	0.705	-0.505	-7.991	1.33546e-15	1.62743e-14	0.0011	0.0091	0.0027	0.0027	TRUE	0.0224
MD00G1107800	66	114	115	79	157	89	61	123	75	61	89	97	73	127	85	62	113	89	107.63	82	95	88	1.119	0.162	0.802	0.422601	0.510687	0.0504	0.0231	0.0393	0.0393	TRUE	0.2199	1.045	0.063	0.354	0.723533	0.791452	0.0504	0.0231	0.0393	0.0393	TRUE	0.2199
MD00G1107900	0	0	0	0	0	0	0	0	0	0	0	0	0	0	0	0	0	0	0	0	0	0	1	0	NA	NA	NA	NA	NA	NA	NA	NA	NA	1	0	NA	NA	NA	NA	NA	NA	NA	NA	NA
MD00G1108000	3978	4190	5085	5027	6433	4960	3738	5018	3963	3662	3287	4310	4659	5217	4765	3817	4600	4711	3916.63	3753	4880	4376	1.251	0.323	1.878	0.0603136	0.0957959	0.0417	0.009	0.0291	0.0291	TRUE	0.5434	1.127	0.172	1.098	0.272183	0.366024	0.0417	0.009	0.0291	0.0291	TRUE	0.5434
MD00G1108200	520	718	633	597	598	572	565	547	399	479	563	536	553	485	549	577	501	474	497.92	526	529	517	1.004	0.006	0.056	0.955183	0.973935	0.0055	0.0118	0.0074	0.0074	TRUE	0.0585	0.985	-0.022	-0.21	0.833361	0.879262	0.0055	0.0118	0.0074	0.0074	TRUE	0.0585
MD00G1108400	0	0	0	0	0	0	0	0	0	0	0	0	0	0	0	0	0	0	0	0	0	0	1	0	NA	NA	NA	NA	NA	NA	NA	NA	NA	1	0	NA	NA	NA	NA	NA	NA	NA	NA	NA
MD00G1108500	0	0	0	0	0	0	0	0	0	0	0	0	0	0	0	0	0	0	0	0	0	0	1	0	NA	NA	NA	NA	NA	NA	NA	NA	NA	1	0	NA	NA	NA	NA	NA	NA	NA	NA	NA
MD00G1108700	30	40	46	53	53	46	43	39	34	28	31	39	49	43	44	44	36	40	41.32	33	45	40	1.305	0.384	1.959	0.0501513	0.0815766	0	0.0465	0.019	0.019	TRUE	0.1045	1.152	0.204	1.15	0.250127	0.341795	0	0.0465	0.019	0.019	TRUE	0.1045
MD00G1108800	7	6	6	13	23	18	13	15	13	6	5	5	12	19	17	13	14	15	10.84	5	16	14	2.329	1.22	3.236	0.00121096	0.00284668	0	0.1529	0.0643	0.0643	TRUE	0.1297	1.969	0.977	2.787	0.00531901	0.0121009	0	0.1529	0.0643	0.0643	TRUE	0.1297
MD00G1108900	3	3	3	14	32	26	18	14	13	3	2	3	13	26	25	18	13	15	17.71	3	21	15	7.295	2.867	5.089	3.60487e-07	1.49412e-06	0	0.0969	0.0746	0.0746	TRUE	0.0485	5	2.322	4.225	2.38695e-05	8.67706e-05	0	0.0969	0.0746	0.0746	TRUE	0.0485
MD00G1109100	0	1	3	1	4	3	0	3	4	0	1	3	1	3	3	0	3	5	2.05	1	2	3	1.212	0.277	0.809	0.418612	0.506622	0.6174	0.7702	0.707	0.707	TRUE	0.1367	1.2	0.263	0.847	0.397195	0.497311	0.6174	0.7702	0.707	0.707	TRUE	0.1367
MD00G1109200	281	300	269	123	136	111	311	315	311	259	235	228	114	110	107	318	289	370	865.85	241	110	326	0.468	-1.095	-8.693	3.51448e-18	4.48357e-17	0.0041	0.0104	0.0062	0.0062	TRUE	0.0771	1.317	0.397	3.738	0.000185493	0.000575605	0.0041	0.0104	0.0062	0.0062	TRUE	0.0771
MD00G1109300	1	0	3	1	5	0	0	3	0	1	0	3	1	4	0	0	3	0	2.95	1	2	1	1.109	0.149	0.464	0.642939	0.71557	0.5854	0.5384	0.5506	0.5506	TRUE	0.4544	0.972	-0.041	-0.144	0.885536	0.919029	0.5854	0.5384	0.5506	0.5506	TRUE	0.4544
MD00G1109400	47	52	54	88	68	97	84	80	83	43	41	46	82	55	93	86	73	99	64.44	43	77	86	1.628	0.703	3.474	0.000513532	0.00129934	0.0184	0.0329	0.0243	0.0243	TRUE	0.2154	1.83	0.872	4.17	3.05253e-05	0.000108833	0.0184	0.0329	0.0243	0.0243	TRUE	0.2154
MD00G1109500	0	0	0	0	1	3	0	0	0	0	0	0	0	1	3	0	0	0	0.51	0	1	0	1.421	0.507	1.129	0.25878	NA	0	3.1005	3.6211	3.6211	TRUE	0.0828	1	0	0	1	NA	0	3.1005	3.6211	3.6211	TRUE	0.0828
MD00G1109600	1563	1621	1836	2403	2845	2291	1880	2205	1729	1439	1272	1556	2227	2307	2201	1920	2021	2055	1675.37	1422	2245	1999	1.545	0.627	5.533	3.14789e-08	1.50474e-07	0.0099	0.0096	0.0097	0.0097	TRUE	0.1519	1.369	0.453	4.112	3.91462e-05	0.000136977	0.0099	0.0096	0.0097	0.0097	TRUE	0.1519
MD00G1109700	4236	5050	3928	5711	5767	5634	6419	7053	4991	3899	3961	3329	5292	4677	5412	6555	6466	5933	6454.93	3730	5127	6318	1.323	0.404	2.525	0.0115714	0.0221326	0.0297	0.0089	0.0236	0.0236	TRUE	0.0377	1.601	0.679	4.183	2.87756e-05	0.000103148	0.0297	0.0089	0.0236	0.0236	TRUE	0.0377
MD00G1109800	56	51	57	16	28	20	14	14	11	52	40	48	15	23	19	14	13	13	20.74	47	19	13	0.458	-1.126	-4.098	4.16633e-05	0.000127128	0	0.084	0.0388	0.0388	TRUE	0.1753	0.314	-1.672	-5.181	2.20179e-07	1.09634e-06	0	0.084	0.0388	0.0388	TRUE	0.1753
MD00G1109900	1470	1539	1669	1541	1835	1441	1352	1580	1025	1353	1207	1414	1428	1488	1384	1381	1448	1218	1045.84	1325	1433	1349	1.078	0.108	1.054	0.29207	0.375058	0.0062	0.0101	0.0078	0.0078	TRUE	0.2476	1.017	0.025	0.252	0.80121	0.853388	0.0062	0.0101	0.0078	0.0078	TRUE	0.2476
MD00G1110200	100	155	92	96	127	96	42	52	35	92	122	78	89	103	92	43	48	42	66.8	97	95	44	0.978	-0.032	-0.187	0.851731	0.891839	0	0.032	0.0217	0.0217	TRUE	0.1442	0.481	-1.055	-4.982	6.29866e-07	2.9367e-06	0	0.032	0.0217	0.0217	TRUE	0.1442
MD00G1110300	0	0	0	0	0	0	0	2	0	0	0	0	0	0	0	0	2	0	0.41	0	0	1	1	0	0	1	NA	0	3.821	5.9386	5.9386	TRUE	0.2798	1.173	0.23	0.611	0.541149	NA	0	3.821	5.9386	5.9386	TRUE	0.2798
MD00G1110400	540	598	624	430	522	414	325	384	282	497	469	529	398	423	398	332	352	335	390.49	498	406	340	0.828	-0.272	-2.231	0.025702	0.0451896	0.0095	0.0126	0.0105	0.0105	TRUE	0.2771	0.705	-0.504	-4.132	3.59984e-05	0.000126771	0.0095	0.0126	0.0105	0.0105	TRUE	0.2771
MD00G1110500	588	608	612	445	488	444	581	662	545	541	477	519	412	396	427	593	607	648	568.46	512	412	616	0.816	-0.294	-2.455	0.0140942	0.0264147	0.0094	0.0114	0.01	0.01	TRUE	0.2014	1.179	0.238	2.09	0.0366307	0.0669194	0.0094	0.0114	0.01	0.01	TRUE	0.2014
MD00G1110700	250	311	288	0	0	1	9	9	1	230	244	244	0	0	1	9	8	1	109.29	239	0	6	0.002	-8.721	-8.049	8.35294e-16	8.80886e-15	0	0.0229	0.0109	0.0109	TRUE	0.436	0.028	-5.148	-14.563	4.80471e-48	3.11596e-46	0	0.0229	0.0109	0.0109	TRUE	0.436
MD00G1110800	0	0	0	0	0	0	1	0	0	0	0	0	0	0	0	1	0	0	0.09	0	0	0	1	0	0	1	NA	0	18.3825	12	12	TRUE	0.2059	1.074	0.103	0.283	0.77683	NA	0	18.3825	12	12	TRUE	0.2059
MD00G1110900	0	0	0	1	1	0	0	0	0	0	0	0	1	1	0	0	0	0	0.14	0	1	0	1.124	0.168	0.434	0.664508	NA	0	10.8057	12	12	TRUE	0.1091	1	0	0	1	NA	0	10.8057	12	12	TRUE	0.1091
MD00G1111000	1	0	0	0	0	1	0	0	0	1	0	0	0	0	1	0	0	0	0.16	0	0	0	1.005	0.007	0.018	0.985609	NA	0	9.9829	12	12	TRUE	0.251	0.963	-0.055	-0.153	0.87841	NA	0	9.9829	12	12	TRUE	0.251
MD00G1111100	0	0	0	6	7	7	2	2	5	0	0	0	6	6	7	2	2	6	2.39	0	6	3	18.625	4.219	3.704	0.000211976	0.000574837	0	0.6626	0.3776	0.3776	TRUE	0.2989	7.073	2.822	2.976	0.00291958	0.00707186	0	0.6626	0.3776	0.3776	TRUE	0.2989
MD00G1111200	0	0	0	0	0	0	0	2	0	0	0	0	0	0	0	0	2	0	0.15	0	0	1	1	0	0	1	NA	0	10.2421	12	12	TRUE	0.4868	1.123	0.167	0.454	0.649792	NA	0	10.2421	12	12	TRUE	0.4868
MD00G1111300	0	0	0	0	0	0	1	0	0	0	0	0	0	0	0	1	0	0	0.09	0	0	0	1	0	0	1	NA	0	18.3825	12	12	TRUE	0.2059	1.074	0.103	0.283	0.77683	NA	0	18.3825	12	12	TRUE	0.2059
MD00G1111400	1	0	0	0	0	0	5	1	2	1	0	0	0	0	0	5	1	2	0.78	0	0	3	0.912	-0.133	-0.362	0.717563	0.77975	0	2.0217	2.2879	2.2879	TRUE	0.086	1.604	0.682	1.457	0.145055	0.216903	0	2.0217	2.2879	2.2879	TRUE	0.086
MD00G1111500	102	140	102	88	86	89	114	162	126	94	110	86	82	70	85	116	149	150	150.66	97	79	138	0.84	-0.251	-1.434	0.151712	0.213897	0.0223	0.019	0.0211	0.0211	TRUE	0.3126	1.336	0.418	2.546	0.0108964	0.0229979	0.0223	0.019	0.0211	0.0211	TRUE	0.3126
MD00G1111600	2	0	1	0	0	0	0	0	0	2	0	1	0	0	0	0	0	0	0.22	1	0	0	0.857	-0.223	-0.563	0.573315	NA	0	6.9875	12	12	TRUE	0.0081	0.876	-0.191	-0.515	0.606506	NA	0	6.9875	12	12	TRUE	0.0081
MD00G1111700	378	493	403	468	509	456	396	391	357	348	387	342	434	413	438	404	358	424	316.49	359	428	395	1.182	0.241	2.427	0.0152316	0.028313	0	0.0136	0.0056	0.0056	TRUE	0.0407	1.091	0.126	1.292	0.196455	0.279825	0	0.0136	0.0056	0.0056	TRUE	0.0407
MD00G1111800	1796	2369	1963	3293	3835	3382	3107	3424	2388	1653	1858	1664	3052	3110	3249	3173	3139	2839	3725.27	1725	3137	3050	1.775	0.828	6.869	6.44438e-12	4.69541e-11	0.0111	0.009	0.011	0.011	TRUE	0.0292	1.725	0.786	6.541	6.11877e-11	4.74265e-10	0.0111	0.009	0.011	0.011	TRUE	0.0292
MD00G1111900	997	1150	1013	1769	2087	1699	1528	1792	1142	918	902	859	1639	1693	1632	1560	1643	1357	1361.39	893	1655	1520	1.821	0.864	8.161	3.31917e-16	3.62118e-15	0.0071	0.0098	0.0078	0.0078	TRUE	0.1137	1.67	0.74	7.019	2.23069e-12	2.01264e-11	0.0071	0.0098	0.0078	0.0078	TRUE	0.1137
MD00G1112000	0	0	0	0	0	0	1	0	0	0	0	0	0	0	0	1	0	0	0.09	0	0	0	1	0	0	1	NA	0	18.3825	12	12	TRUE	0.2059	1.074	0.103	0.283	0.77683	NA	0	18.3825	12	12	TRUE	0.2059
MD00G1112100	809	903	806	0	1	0	2	0	0	745	708	683	0	1	0	2	0	0	178.37	712	0	1	0.001	-10.248	-9.384	6.34029e-21	9.83484e-20	0	0.0174	0.0101	0.0101	TRUE	0.4869	0.001	-9.393	-9.75	1.84564e-22	3.68437e-21	0	0.0174	0.0101	0.0101	TRUE	0.4869
MD00G1112200	0	2	0	0	1	0	17	9	9	0	2	0	0	1	0	17	8	11	3.22	1	0	12	0.897	-0.157	-0.456	0.648254	0.720282	0	0.4936	0.4014	0.4014	TRUE	0.3099	10.917	3.449	3.433	0.000596708	0.00167972	0	0.4936	0.4014	0.4014	TRUE	0.3099
MD00G1112300	0	1	0	0	0	0	0	0	0	0	1	0	0	0	0	0	0	0	0.07	0	0	0	0.948	-0.076	-0.2	0.841337	NA	0	23.9269	12	12	TRUE	0.1785	0.963	-0.055	-0.153	0.878411	NA	0	23.9269	12	12	TRUE	0.1785
MD00G1112400	354	360	399	446	544	431	427	528	341	326	282	338	413	441	414	436	484	405	299.33	315	423	442	1.317	0.398	3.386	0.000708254	0.00174582	0.0047	0.0138	0.0089	0.0089	TRUE	0.9627	1.364	0.448	3.885	0.000102149	0.000332299	0.0047	0.0138	0.0089	0.0089	TRUE	0.9627
MD00G1112500	169	256	213	398	477	384	362	377	258	156	201	181	369	387	369	370	346	307	290.91	179	375	341	2.044	1.031	8.047	8.48688e-16	8.94504e-15	0.0062	0.014	0.009	0.009	TRUE	0.0884	1.856	0.892	6.926	4.33163e-12	3.79349e-11	0.0062	0.014	0.009	0.009	TRUE	0.0884
MD00G1113000	1	0	3	0	0	0	0	0	0	1	0	3	0	0	0	0	0	0	0.29	1	0	0	0.835	-0.261	-0.651	0.514905	NA	0	5.4266	12	12	TRUE	0.0151	0.855	-0.227	-0.603	0.546564	NA	0	5.4266	12	12	TRUE	0.0151
MD00G1113200	162	206	183	167	156	152	150	154	137	149	162	155	155	127	146	153	141	163	151.47	155	143	152	0.924	-0.114	-0.794	0.427475	0.515424	0.0088	0.0189	0.0128	0.0128	TRUE	0.2331	0.982	-0.026	-0.19	0.848953	0.891375	0.0088	0.0189	0.0128	0.0128	TRUE	0.2331
MD00G1113300	7	15	15	41	34	26	46	49	26	6	12	13	38	28	25	47	45	31	23.99	10	30	41	2.5	1.322	3.994	6.49559e-05	0.000192361	0.0259	0.0738	0.051	0.051	TRUE	0.2552	3.603	1.849	5.214	1.84417e-07	9.29164e-07	0.0259	0.0738	0.051	0.051	TRUE	0.2552
MD00G1113500	0	0	1	1	0	1	0	0	0	0	0	1	1	0	1	0	0	0	0.23	0	1	0	1.074	0.104	0.268	0.788669	NA	0	6.8693	9.1008	9.1008	TRUE	0.2117	0.958	-0.062	-0.172	0.86359	NA	0	6.8693	9.1008	9.1008	TRUE	0.2117
MD00G1113600	2	1	0	0	0	1	0	1	0	2	1	0	0	0	1	0	1	0	0.73	1	0	0	0.838	-0.255	-0.679	0.496857	0.58291	0	2.1628	1.6892	1.6892	TRUE	0.0941	0.873	-0.196	-0.58	0.561634	0.652806	0	2.1628	1.6892	1.6892	TRUE	0.0941
MD00G1113700	342	370	358	487	565	524	383	468	341	315	290	303	451	458	503	391	429	405	396.32	303	471	408	1.533	0.617	6.596	4.22385e-11	2.82019e-10	0	0.0126	0.0044	0.0044	TRUE	0.0236	1.328	0.409	4.391	1.12828e-05	4.32276e-05	0	0.0126	0.0044	0.0044	TRUE	0.0236
MD00G1113800	451	535	506	612	694	607	588	626	475	415	420	429	567	563	583	600	574	565	504.97	421	571	580	1.339	0.421	4.482	7.39168e-06	2.53995e-05	0.0019	0.0117	0.0051	0.0051	TRUE	0.1029	1.352	0.435	4.673	2.96948e-06	1.24895e-05	0.0019	0.0117	0.0051	0.0051	TRUE	0.1029
MD00G1113900	273	345	316	44	58	36	60	66	92	251	271	268	41	47	35	61	61	109	150.44	263	41	77	0.159	-2.65	-10.894	1.22519e-27	2.94757e-26	0.0406	0.019	0.0312	0.0312	TRUE	0.3153	0.301	-1.732	-7.617	2.59818e-14	2.84457e-13	0.0406	0.019	0.0312	0.0312	TRUE	0.3153
MD00G1114000	2	0	0	1	1	0	0	3	2	2	0	0	1	1	0	0	3	2	0.94	1	1	2	0.999	-0.001	-0.003	0.997478	1	0	1.6763	1.6156	1.6156	TRUE	0.4875	1.212	0.277	0.802	0.422691	0.522323	0	1.6763	1.6156	1.6156	TRUE	0.4875
MD00G1114100	105	110	111	10	8	11	29	29	20	97	86	94	9	6	11	30	27	24	52.06	92	9	27	0.097	-3.369	-10.334	4.93989e-25	1.02111e-23	0	0.0387	0.0223	0.0223	TRUE	0.218	0.303	-1.723	-7.053	1.75644e-12	1.59868e-11	0	0.0387	0.0223	0.0223	TRUE	0.218
MD00G1114200	5	9	4	0	0	0	0	0	0	5	7	3	0	0	0	0	0	0	1.41	5	0	0	0.138	-2.854	-2.849	0.0043899	0.00921886	0	1.1209	1.0728	1.0728	TRUE	0.2998	0.171	-2.548	-2.728	0.00636312	0.0141999	0	1.1209	1.0728	1.0728	TRUE	0.2998
MD00G1114300	147	166	180	34	41	43	18	20	26	135	130	153	32	33	41	18	18	31	63.12	139	35	22	0.261	-1.941	-9.346	9.14539e-21	1.40458e-19	0	0.0334	0.0167	0.0167	TRUE	0.2576	0.163	-2.621	-10.859	1.79846e-27	4.80749e-26	0	0.0334	0.0167	0.0167	TRUE	0.2576
MD00G1114400	840	1000	837	942	1133	909	760	933	621	773	784	709	873	919	873	776	855	738	927.5	755	888	790	1.16	0.214	1.653	0.0982332	0.146618	0.0146	0.0103	0.0133	0.0133	TRUE	0.0506	1.039	0.056	0.455	0.649085	0.728762	0.0146	0.0103	0.0133	0.0133	TRUE	0.0506
MD00G1114500	345	345	332	161	168	154	112	135	160	318	271	281	149	136	148	114	124	190	160.74	290	144	143	0.519	-0.946	-5.837	5.31958e-09	2.79942e-08	0.0157	0.0184	0.0168	0.0168	TRUE	0.4141	0.508	-0.977	-5.909	3.4349e-09	2.17355e-08	0.0157	0.0184	0.0168	0.0168	TRUE	0.4141
MD00G1114600	327	300	335	103	112	94	116	144	121	301	235	284	95	91	90	118	132	144	131.85	273	92	131	0.345	-1.536	-9.545	1.36396e-21	2.21717e-20	0.0073	0.0205	0.013	0.013	TRUE	0.2711	0.495	-1.015	-6.6	4.12085e-11	3.25289e-10	0.0073	0.0205	0.013	0.013	TRUE	0.2711
MD00G1114700	2	0	1	1	0	0	0	0	0	2	0	1	1	0	0	0	0	0	0.42	1	0	0	0.867	-0.206	-0.533	0.594126	NA	0	3.7	3.9596	3.9596	TRUE	0.1203	0.807	-0.31	-0.807	0.419524	NA	0	3.7	3.9596	3.9596	TRUE	0.1203
MD00G1114800	194	313	234	228	289	195	267	229	169	179	246	198	211	234	187	273	210	201	291.23	208	211	228	1.015	0.021	0.136	0.891825	0.924091	0.0198	0.014	0.0178	0.0178	TRUE	0.0665	1.078	0.109	0.764	0.445024	0.544066	0.0198	0.014	0.0178	0.0178	TRUE	0.0665
MD00G1114900	0	0	0	0	0	0	0	0	0	0	0	0	0	0	0	0	0	0	0	0	0	0	1	0	NA	NA	NA	NA	NA	NA	NA	NA	NA	1	0	NA	NA	NA	NA	NA	NA	NA	NA	NA
MD00G1115000	145	167	169	3	9	6	8	5	6	133	131	143	3	7	6	8	5	7	38.35	136	5	7	0.041	-4.606	-11.827	2.81658e-32	8.32913e-31	0	0.0494	0.0254	0.0254	TRUE	0.1919	0.05	-4.321	-11.336	8.68113e-30	2.60015e-28	0	0.0494	0.0254	0.0254	TRUE	0.1919
MD00G1115100	76	98	96	54	55	50	61	80	57	70	77	81	50	45	48	62	73	68	61.78	76	48	68	0.659	-0.601	-3.449	0.000563258	0.00141459	0	0.0339	0.0131	0.0131	TRUE	0.0785	0.913	-0.131	-0.865	0.386902	0.486942	0	0.0339	0.0131	0.0131	TRUE	0.0785
MD00G1115200	3	8	9	15	12	8	9	7	11	3	6	8	14	10	8	9	6	13	20.33	6	11	9	1.444	0.53	1.773	0.0761799	0.117456	0	0.0855	0.0644	0.0644	TRUE	0.0714	1.287	0.363	1.419	0.155781	0.2305	0	0.0855	0.0644	0.0644	TRUE	0.0714
MD00G1115300	4	2	4	3	1	3	4	2	2	4	2	3	3	1	3	4	2	2	3.55	3	2	3	0.906	-0.143	-0.473	0.636553	0.709862	0	0.4492	0.2383	0.2383	TRUE	0.033	0.991	-0.014	-0.054	0.957236	0.973792	0	0.4492	0.2383	0.2383	TRUE	0.033
MD00G1115400	0	1	1	76	62	72	10	4	4	0	1	1	70	50	69	10	4	5	36.49	1	63	6	76.754	6.262	6.393	1.62793e-10	1.01889e-09	0	0.0515	0.0589	0.0589	TRUE	0.4715	5.563	2.476	3.105	0.00190375	0.00480673	0	0.0515	0.0589	0.0589	TRUE	0.4715
MD00G1115500	0	0	0	4	3	2	0	0	0	0	0	0	4	2	2	0	0	0	0.79	0	3	0	2.46	1.299	1.993	0.0462909	0.0760101	0	1.9777	1.8906	1.8906	TRUE	0.32	1	0	0	1	1	0	1.9777	1.8906	1.8906	TRUE	0.32
MD00G1115600	190	236	241	124	139	100	109	133	120	175	185	204	115	113	96	111	122	143	139.47	188	108	125	0.608	-0.718	-4.094	4.23866e-05	0.000129218	0.022	0.0198	0.0212	0.0212	TRUE	0.5012	0.71	-0.495	-3.016	0.00256196	0.00629451	0.022	0.0198	0.0212	0.0212	TRUE	0.5012
MD00G1115700	2700	3122	2782	2108	2318	1919	2578	2823	2118	2485	2449	2358	1954	1880	1843	2633	2588	2518	1949.47	2431	1892	2580	0.781	-0.356	-6.19	6.01653e-10	3.54042e-09	0.0003	0.0094	0.002	0.002	TRUE	0.009	1.06	0.084	1.486	0.137306	0.207159	0.0003	0.0094	0.002	0.002	TRUE	0.009
MD00G1115800	3	3	3	5	6	1	2	5	3	3	2	3	5	5	1	2	5	4	3.07	3	4	4	1.122	0.166	0.548	0.583382	0.662898	0	0.5176	0.2421	0.2421	TRUE	0.2972	1.09	0.125	0.481	0.630443	0.712811	0	0.5176	0.2421	0.2421	TRUE	0.2972
MD00G1115900	3	1	1	5	4	0	2	1	2	3	1	1	5	3	0	2	1	2	2.09	2	3	2	1.183	0.243	0.736	0.46178	0.548855	0	0.7567	0.569	0.569	TRUE	0.1639	1.044	0.062	0.222	0.824222	0.872045	0	0.7567	0.569	0.569	TRUE	0.1639
MD00G1116000	76	89	64	137	125	98	118	121	92	70	70	54	127	101	94	120	111	109	105.09	65	107	113	1.585	0.664	4.128	3.66067e-05	0.000112778	0	0.0235	0.012	0.012	TRUE	0.1238	1.668	0.738	4.545	5.48565e-06	2.21313e-05	0	0.0235	0.012	0.012	TRUE	0.1238
MD00G1116100	335	368	358	184	230	198	188	220	161	308	289	303	171	187	190	192	202	191	386.87	300	183	195	0.628	-0.672	-5.017	5.25194e-07	2.13014e-06	0.0101	0.0127	0.0109	0.0109	TRUE	0.0369	0.676	-0.565	-4.309	1.64045e-05	6.11479e-05	0.0101	0.0127	0.0109	0.0109	TRUE	0.0369
MD00G1116200	0	0	0	0	0	0	0	0	0	0	0	0	0	0	0	0	0	0	0	0	0	0	1	0	NA	NA	NA	NA	NA	NA	NA	NA	NA	1	0	NA	NA	NA	NA	NA	NA	NA	NA	NA
MD00G1116300	274	330	297	363	423	300	240	264	176	252	259	252	336	343	288	245	242	209	260.28	254	322	232	1.248	0.32	2.635	0.0084197	0.0166519	0.0062	0.0146	0.0092	0.0092	TRUE	0.1356	0.925	-0.113	-0.953	0.34046	0.439193	0.0062	0.0146	0.0092	0.0092	TRUE	0.1356
MD00G1116400	227	221	246	75	96	83	232	272	135	209	173	208	70	78	80	237	249	160	150.74	197	76	215	0.398	-1.33	-7.382	1.5611e-13	1.34256e-12	0.0158	0.019	0.017	0.017	TRUE	0.2594	1.081	0.113	0.797	0.425716	0.525191	0.0158	0.019	0.017	0.017	TRUE	0.2594
MD00G1116600	9	19	21	40	46	48	60	46	37	8	15	18	37	37	46	61	42	44	60.41	14	40	49	2.687	1.426	5.275	1.32594e-07	5.82245e-07	0	0.0345	0.0193	0.0193	TRUE	0.248	3.365	1.751	6.321	2.59136e-10	1.87194e-09	0	0.0345	0.0193	0.0193	TRUE	0.248
MD00G1116700	91	93	87	150	178	157	115	150	84	84	73	74	139	144	151	117	138	100	105.52	77	145	118	1.812	0.857	5.509	3.60232e-08	1.71013e-07	0	0.0234	0.0113	0.0113	TRUE	0.0922	1.472	0.558	3.696	0.000218631	0.00066941	0	0.0234	0.0113	0.0113	TRUE	0.0922
MD00G1117000	11	21	16	20	40	26	34	12	14	10	16	14	19	32	25	35	11	17	17.41	13	25	21	1.507	0.591	2.023	0.0430287	0.0712844	0.0992	0.0985	0.0988	0.0988	TRUE	0.3174	1.252	0.324	1.346	0.178387	0.258312	0.0992	0.0985	0.0988	0.0988	TRUE	0.3174
MD00G1117100	0	1	0	0	0	0	1	0	0	0	1	0	0	0	0	1	0	0	0.15	0	0	0	0.948	-0.076	-0.2	0.841335	NA	0	10.3999	12	12	TRUE	0.2059	1.016	0.023	0.065	0.947985	NA	0	10.3999	12	12	TRUE	0.2059
MD00G1117200	0	0	0	0	0	0	0	0	0	0	0	0	0	0	0	0	0	0	0	0	0	0	1	0	NA	NA	NA	NA	NA	NA	NA	NA	NA	1	0	NA	NA	NA	NA	NA	NA	NA	NA	NA
MD00G1117300	0	0	0	0	0	0	0	0	0	0	0	0	0	0	0	0	0	0	0.11	0	0	0	1	0	0	1	NA	0	14.7583	12	12	TRUE	0.243	1	0	0	1	NA	0	14.7583	12	12	TRUE	0.243
MD00G1117400	0	0	0	0	0	0	0	0	0	0	0	0	0	0	0	0	0	0	0	0	0	0	1	0	NA	NA	NA	NA	NA	NA	NA	NA	NA	1	0	NA	NA	NA	NA	NA	NA	NA	NA	NA
MD00G1117500	43	67	48	165	207	154	130	193	110	40	53	41	153	168	148	133	177	131	94.98	45	156	147	3.422	1.775	9.155	5.42114e-20	7.95257e-19	0	0.0251	0.0159	0.0159	TRUE	0.1755	3.224	1.689	8.625	6.43267e-18	9.45504e-17	0	0.0251	0.0159	0.0159	TRUE	0.1755
MD00G1117700	0	0	0	0	0	0	0	0	0	0	0	0	0	0	0	0	0	0	0	0	0	0	1	0	NA	NA	NA	NA	NA	NA	NA	NA	NA	1	0	NA	NA	NA	NA	NA	NA	NA	NA	NA
MD00G1117800	0	0	0	0	0	0	0	0	0	0	0	0	0	0	0	0	0	0	0	0	0	0	1	0	NA	NA	NA	NA	NA	NA	NA	NA	NA	1	0	NA	NA	NA	NA	NA	NA	NA	NA	NA
MD00G1117900	0	0	0	0	0	0	0	0	0	0	0	0	0	0	0	0	0	0	0	0	0	0	1	0	NA	NA	NA	NA	NA	NA	NA	NA	NA	1	0	NA	NA	NA	NA	NA	NA	NA	NA	NA
MD00G1118000	0	0	0	0	0	0	0	0	1	0	0	0	0	0	0	0	0	1	0.1	0	0	0	1	0	0	1	NA	0	15.793	12	12	TRUE	0.2804	1.074	0.103	0.283	0.77683	NA	0	15.793	12	12	TRUE	0.2804
MD00G1118200	5	2	7	0	0	0	1	1	0	5	2	6	0	0	0	1	1	0	1.28	4	0	1	0.159	-2.65	-2.797	0.00516295	0.010687	0	1.2338	0.8492	0.8492	TRUE	0.1663	0.59	-0.761	-1.667	0.0954912	0.152591	0	1.2338	0.8492	0.8492	TRUE	0.1663
MD00G1118300	0	0	0	0	0	0	0	0	0	0	0	0	0	0	0	0	0	0	0	0	0	0	1	0	NA	NA	NA	NA	NA	NA	NA	NA	NA	1	0	NA	NA	NA	NA	NA	NA	NA	NA	NA
MD00G1118400	0	0	0	0	0	0	0	0	0	0	0	0	0	0	0	0	0	0	0	0	0	0	1	0	NA	NA	NA	NA	NA	NA	NA	NA	NA	1	0	NA	NA	NA	NA	NA	NA	NA	NA	NA
MD00G1118600	157	180	191	187	212	165	147	150	112	145	141	162	173	172	159	150	138	133	185.57	149	168	140	1.118	0.16	1.378	0.168096	0.233483	0	0.017	0.0057	0.0057	TRUE	0.0299	0.948	-0.077	-0.67	0.502839	0.598993	0	0.017	0.0057	0.0057	TRUE	0.0299
MD00G1118700	194	273	233	241	301	171	200	202	154	179	214	197	223	244	164	204	185	183	157.29	197	210	191	1.062	0.087	0.571	0.568326	0.649474	0.0168	0.0186	0.0176	0.0176	TRUE	0.3105	0.975	-0.036	-0.255	0.798868	0.851598	0.0168	0.0186	0.0176	0.0176	TRUE	0.3105
MD00G1118800	3	14	9	19	21	13	10	17	8	3	11	8	18	17	12	10	16	10	9.47	7	16	12	1.628	0.703	2.174	0.0296951	0.0513771	0	0.1737	0.1044	0.1044	TRUE	0.2372	1.266	0.34	1.335	0.18185	0.262409	0	0.1737	0.1044	0.1044	TRUE	0.2372
MD00G1118900	1	2	1	11	8	5	4	4	2	1	2	1	10	6	5	4	4	2	3.25	1	7	3	3.22	1.687	2.759	0.00579831	0.0118671	0	0.4902	0.2354	0.2354	TRUE	0.2937	1.469	0.555	1.554	0.120291	0.185357	0	0.4902	0.2354	0.2354	TRUE	0.2937
MD00G1119400	98	104	95	171	238	169	135	161	86	90	82	81	158	193	162	138	148	102	108.41	84	171	129	1.962	0.972	5.988	2.12558e-09	1.17566e-08	0	0.023	0.0137	0.0137	TRUE	0.157	1.463	0.549	3.547	0.000389058	0.00113628	0	0.023	0.0137	0.0137	TRUE	0.157
MD00G1119600	0	0	0	0	0	0	0	0	0	0	0	0	0	0	0	0	0	0	0	0	0	0	1	0	NA	NA	NA	NA	NA	NA	NA	NA	NA	1	0	NA	NA	NA	NA	NA	NA	NA	NA	NA
MD00G1119900	116	150	145	117	145	114	100	124	94	107	118	123	108	118	110	102	114	112	106.45	116	112	109	0.971	-0.042	-0.254	0.799186	0.848325	0.0172	0.0233	0.02	0.02	TRUE	0.149	0.955	-0.066	-0.431	0.666245	0.743285	0.0172	0.0233	0.02	0.02	TRUE	0.149
MD00G1120000	0	2	0	0	6	2	0	2	3	0	2	0	0	5	2	0	2	4	1.15	1	2	2	1.342	0.424	1.041	0.297905	0.38142	3.2262	1.3726	1.8835	1.8835	TRUE	0.1148	1.233	0.302	0.846	0.397421	0.49756	3.2262	1.3726	1.8835	1.8835	TRUE	0.1148
MD00G1120100	365	429	380	541	672	553	402	442	395	336	337	322	501	545	531	411	405	470	522.87	332	526	429	1.563	0.644	6.802	1.03384e-11	7.38681e-11	0.0019	0.0116	0.0048	0.0048	TRUE	0.0387	1.268	0.343	3.649	0.000263489	0.000793533	0.0019	0.0116	0.0048	0.0048	TRUE	0.0387
MD00G1120300	14	16	22	12	6	2	3	2	2	13	13	19	11	5	2	3	2	2	7.66	15	6	2	0.575	-0.798	-2.264	0.0235533	0.0418299	0	0.2129	0.1334	0.1334	TRUE	0.4132	0.225	-2.153	-3.608	0.000308745	0.000918993	0	0.2129	0.1334	0.1334	TRUE	0.4132
MD00G1120400	126	126	100	39	49	54	57	63	51	116	99	85	36	40	52	58	58	61	66.12	100	43	59	0.447	-1.162	-5.923	3.15786e-09	1.71083e-08	0	0.0323	0.0163	0.0163	TRUE	0.0853	0.632	-0.662	-3.771	0.000162458	0.000510496	0	0.0323	0.0163	0.0163	TRUE	0.0853
MD00G1120600	799	970	975	373	459	354	300	322	248	735	761	826	346	372	340	306	295	295	557.16	774	353	299	0.462	-1.114	-10.418	2.05026e-25	4.33168e-24	0.0049	0.0114	0.0067	0.0067	TRUE	0.0722	0.39	-1.36	-12.296	9.57478e-35	3.6065e-33	0.0049	0.0114	0.0067	0.0067	TRUE	0.0722
MD00G1120700	45	44	51	0	0	0	0	0	0	41	35	43	0	0	0	0	0	0	37.21	40	0	0	0.007	-7.153	-6.592	4.34076e-11	2.89514e-10	0	0.0506	0.0265	0.0265	TRUE	0.0507	0.008	-6.964	-6.419	1.37581e-10	1.02752e-09	0	0.0506	0.0265	0.0265	TRUE	0.0507
MD00G1120800	0	0	0	3	1	2	2	2	2	0	0	0	3	1	2	2	2	2	2.03	0	2	2	3.083	1.624	2.339	0.0193566	0.0351125	0	0.7793	0.4002	0.4002	TRUE	0.0443	3.519	1.815	2.465	0.0137204	0.02818	0	0.7793	0.4002	0.4002	TRUE	0.0443
MD00G1120900	90	90	119	18	19	25	29	34	34	83	71	101	17	15	24	30	31	40	49.42	85	19	34	0.232	-2.106	-7.009	2.39451e-12	1.82525e-11	0.0417	0.0403	0.0411	0.0411	TRUE	0.2801	0.431	-1.215	-4.572	4.82594e-06	1.96098e-05	0.0417	0.0403	0.0411	0.0411	TRUE	0.2801
MD00G1121000	35	31	39	19	14	12	14	10	7	32	24	33	18	11	12	14	9	8	19.24	30	14	10	0.536	-0.9	-3.106	0.00189361	0.00428035	0	0.0899	0.0506	0.0506	TRUE	0.3022	0.417	-1.261	-3.745	0.000180613	0.000561909	0	0.0899	0.0506	0.0506	TRUE	0.3022
MD00G1121200	47	65	62	47	64	50	52	57	52	43	51	53	44	52	48	53	52	62	50.16	49	48	56	0.981	-0.027	-0.149	0.881912	0.915803	0	0.0398	0.0178	0.0178	TRUE	0.1791	1.096	0.132	0.801	0.422972	0.522619	0	0.0398	0.0178	0.0178	TRUE	0.1791
MD00G1121300	36	35	41	134	196	145	94	91	52	33	27	35	124	159	139	96	83	62	88.63	32	141	80	4.327	2.113	9.842	7.42709e-23	1.32578e-21	0.0112	0.0263	0.0179	0.0179	TRUE	0.1477	2.436	1.284	5.904	3.54559e-09	2.23979e-08	0.0112	0.0263	0.0179	0.0179	TRUE	0.1477
MD00G1121500	151	159	154	1151	1466	1235	686	774	504	139	125	131	1067	1189	1186	701	710	599	609.96	132	1147	670	8.71	3.123	26.516	6.35332e-155	4.93573e-152	0.0043	0.0112	0.0064	0.0064	TRUE	0.0485	5.076	2.344	19.579	2.33849e-85	4.47192e-83	0.0043	0.0112	0.0064	0.0064	TRUE	0.0485
MD00G1121600	699	834	716	854	1055	605	552	866	516	643	654	607	791	856	581	564	794	613	901.21	635	743	657	1.135	0.183	0.96	0.336849	0.422548	0.0569	0.0104	0.0389	0.0389	TRUE	0.064	1.025	0.036	0.211	0.832566	0.87853	0.0569	0.0104	0.0389	0.0389	TRUE	0.064
MD00G1121700	10	1	1	3	3	3	2	1	0	9	1	1	3	2	3	2	1	0	2.69	4	3	1	0.924	-0.113	-0.366	0.714532	0.777237	0.5341	0.5897	0.5581	0.5581	TRUE	1.52	0.698	-0.519	-1.404	0.1603	0.236163	0.5341	0.5897	0.5581	0.5581	TRUE	1.52
MD00G1122000	4	1	2	9	3	4	5	2	2	4	1	2	8	2	4	5	2	2	3.3	2	5	3	1.37	0.455	1.288	0.197703	0.268557	0.2948	0.4826	0.3923	0.3923	TRUE	0.6532	1.122	0.166	0.603	0.546604	0.639442	0.2948	0.4826	0.3923	0.3923	TRUE	0.6532
MD00G1122100	0	1	5	0	0	1	0	1	1	0	1	4	0	0	1	0	1	1	0.78	2	0	1	0.705	-0.504	-1.174	0.240287	0.317865	0	2.0132	1.7215	1.7215	TRUE	0.3387	0.858	-0.22	-0.656	0.511645	0.607349	0	2.0132	1.7215	1.7215	TRUE	0.3387
MD00G1122200	0	0	0	0	2	1	3	3	1	0	0	0	0	2	1	3	3	1	0.9	0	1	2	1.49	0.575	1.299	0.193784	0.264019	0	1.7368	1.1309	1.1309	TRUE	0.243	2.734	1.451	2.167	0.0302277	0.0565802	0	1.7368	1.1309	1.1309	TRUE	0.243
MD00G1122300	0	0	0	0	1	0	1	0	0	0	0	0	0	1	0	1	0	0	0.26	0	0	0	1.077	0.107	0.277	0.781471	NA	0	6.0528	8.1543	8.1543	TRUE	0.243	1.088	0.122	0.333	0.739266	NA	0	6.0528	8.1543	8.1543	TRUE	0.243
MD00G1122500	1	1	3	6	5	3	20	23	17	1	1	3	6	4	3	20	21	20	9.97	2	4	20	1.689	0.756	1.921	0.0546711	0.087973	0	0.1655	0.0694	0.0694	TRUE	0.1875	12.428	3.636	5.224	1.75362e-07	8.86797e-07	0	0.1655	0.0694	0.0694	TRUE	0.1875
MD00G1122600	0	0	0	0	1	0	1	0	1	0	0	0	0	1	0	1	0	1	0.25	0	0	1	1.076	0.106	0.273	0.784672	NA	0	6.2196	8.4663	8.4663	TRUE	0.1698	1.168	0.224	0.592	0.554024	NA	0	6.2196	8.4663	8.4663	TRUE	0.1698
MD00G1122700	22	42	22	17	20	23	28	13	16	20	33	19	16	16	22	29	12	19	15.79	24	18	20	0.837	-0.256	-0.998	0.318148	0.403031	0.0645	0.1077	0.0848	0.0848	TRUE	0.1978	0.904	-0.145	-0.671	0.501943	0.59827	0.0645	0.1077	0.0848	0.0848	TRUE	0.1978
MD00G1122800	0	0	0	0	0	0	0	0	0	0	0	0	0	0	0	0	0	0	0	0	0	0	1	0	NA	NA	NA	NA	NA	NA	NA	NA	NA	1	0	NA	NA	NA	NA	NA	NA	NA	NA	NA
MD00G1122900	62	63	63	145	173	129	55	63	53	57	49	53	134	140	124	56	58	63	62.89	53	133	59	2.419	1.274	7.204	5.86358e-13	4.79502e-12	0	0.0335	0.0129	0.0129	TRUE	0.1236	1.081	0.112	0.717	0.473274	0.5717	0	0.0335	0.0129	0.0129	TRUE	0.1236
MD00G1123000	654	768	809	30	19	31	22	18	15	602	602	686	28	15	30	22	17	18	256.76	630	24	19	0.038	-4.7	-23.071	8.96912e-118	3.12578e-115	0	0.0147	0.0108	0.0108	TRUE	0.3789	0.03	-5.037	-21.821	1.48215e-105	4.12457e-103	0	0.0147	0.0108	0.0108	TRUE	0.3789
MD00G1123300	73	73	81	39	37	27	70	102	66	67	57	69	36	30	26	71	94	78	224.75	64	31	81	0.521	-0.941	-4.189	2.79686e-05	8.77416e-05	0.0315	0.0156	0.0254	0.0254	TRUE	0.0142	1.192	0.253	1.471	0.141372	0.212306	0.0315	0.0156	0.0254	0.0254	TRUE	0.0142
MD00G1123600	69	84	101	4	2	1	0	0	0	64	66	86	4	2	1	0	0	0	21.48	72	2	0	0.032	-4.946	-8.239	1.73324e-16	1.93568e-15	0	0.0814	0.056	0.056	TRUE	0.221	0.005	-7.756	-7.048	1.82099e-12	1.65621e-11	0	0.0814	0.056	0.056	TRUE	0.221
MD00G1123700	0	0	0	0	0	0	0	0	0	0	0	0	0	0	0	0	0	0	0	0	0	0	1	0	NA	NA	NA	NA	NA	NA	NA	NA	NA	1	0	NA	NA	NA	NA	NA	NA	NA	NA	NA
MD00G1123900	0	0	0	0	0	0	0	1	2	0	0	0	0	0	0	0	1	2	0.27	0	0	1	1	0	0	1	NA	0	5.7045	12	12	TRUE	0.0126	1.186	0.246	0.649	0.516321	NA	0	5.7045	12	12	TRUE	0.0126
MD00G1124000	0	0	0	0	0	0	0	0	0	0	0	0	0	0	0	0	0	0	0	0	0	0	1	0	NA	NA	NA	NA	NA	NA	NA	NA	NA	1	0	NA	NA	NA	NA	NA	NA	NA	NA	NA
MD00G1124100	0	0	0	0	0	0	0	0	0	0	0	0	0	0	0	0	0	0	0	0	0	0	1	0	NA	NA	NA	NA	NA	NA	NA	NA	NA	1	0	NA	NA	NA	NA	NA	NA	NA	NA	NA
MD00G1124200	0	0	0	0	0	0	2	0	0	0	0	0	0	0	0	2	0	0	0.91	0	0	1	1	0	0	1	1	4.7509	1.7184	2.2189	2.2189	TRUE	0.0715	1.27	0.345	0.908	0.363762	0.463592	4.7509	1.7184	2.2189	2.2189	TRUE	0.0715
MD00G1124400	6	14	12	91	96	106	75	78	76	6	11	10	84	78	102	77	72	90	53.54	9	88	80	9.458	3.242	10.059	8.37462e-24	1.60148e-22	0	0.0378	0.0247	0.0247	TRUE	0.2513	8.509	3.089	9.513	1.85299e-21	3.46877e-20	0	0.0378	0.0247	0.0247	TRUE	0.2513
MD00G1124500	69	71	75	6	4	3	5	6	4	64	56	64	6	3	3	5	6	5	30.58	61	4	5	0.067	-3.896	-8.781	1.62001e-18	2.13313e-17	0	0.0598	0.0251	0.0251	TRUE	0.1187	0.089	-3.492	-8.318	8.93497e-17	1.19937e-15	0	0.0598	0.0251	0.0251	TRUE	0.1187
MD00G1124700	1	1	1	7	14	7	10	8	7	1	1	1	6	11	7	10	7	8	9.34	1	8	8	6.138	2.618	3.466	0.000528625	0.00133426	0	0.176	0.0941	0.0941	TRUE	0.0301	6.544	2.71	3.509	0.000449162	0.00129618	0	0.176	0.0941	0.0941	TRUE	0.0301
MD00G1124900	0	0	0	1	0	0	0	0	2	0	0	0	1	0	0	0	0	2	0.88	0	0	1	1.126	0.172	0.469	0.639164	0.712177	0	1.7788	1.5545	1.5545	TRUE	0.4878	1.329	0.411	1.057	0.290454	0.386436	0	1.7788	1.5545	1.5545	TRUE	0.4878
MD00G1125100	369	459	435	489	556	453	452	531	386	340	360	369	453	451	435	462	487	459	402.7	356	446	469	1.241	0.312	3.293	0.000992228	0.00237546	0.001	0.0125	0.0048	0.0048	TRUE	0.0852	1.295	0.373	3.994	6.48957e-05	0.000218349	0.001	0.0125	0.0048	0.0048	TRUE	0.0852
MD00G1125200	97	118	98	43	61	59	101	114	107	89	93	83	40	49	57	103	105	127	75.01	88	49	112	0.609	-0.716	-3.22	0.00128381	0.00300145	0.0443	0.0295	0.0374	0.0374	TRUE	0.256	1.179	0.237	1.313	0.18924	0.271319	0.0443	0.0295	0.0374	0.0374	TRUE	0.256
MD00G1125300	43	49	32	22	26	23	29	36	26	40	38	27	20	21	22	30	33	31	43.81	35	21	31	0.674	-0.57	-2.506	0.0122196	0.0232438	0	0.0443	0.0272	0.0272	TRUE	0.0436	0.927	-0.11	-0.597	0.550694	0.642972	0	0.0443	0.0272	0.0272	TRUE	0.0436
MD00G1125400	550	684	504	515	761	518	767	1048	682	506	537	427	477	617	498	783	961	811	569.44	490	531	852	1.073	0.101	0.649	0.516044	0.601195	0.0271	0.0114	0.0212	0.0212	TRUE	0.3835	1.65	0.723	4.498	6.84534e-06	2.71729e-05	0.0271	0.0114	0.0212	0.0212	TRUE	0.3835
MD00G1125500	709	780	740	752	796	657	573	574	439	653	612	627	697	646	631	585	526	522	549.92	631	658	544	1.042	0.06	0.745	0.456067	0.543364	0	0.0115	0.0036	0.0036	TRUE	0.0251	0.871	-0.2	-2.479	0.0131824	0.0272127	0	0.0115	0.0036	0.0036	TRUE	0.0251
MD00G1125600	1169	1327	1346	1269	1467	1118	1190	1257	930	1076	1041	1141	1176	1190	1074	1215	1152	1105	1078.41	1086	1147	1157	1.054	0.076	0.926	0.354253	0.440821	0.0026	0.0101	0.0045	0.0045	TRUE	0.0432	1.063	0.088	1.083	0.278749	0.373461	0.0026	0.0101	0.0045	0.0045	TRUE	0.0432
MD00G1125800	1	1	0	5	5	3	2	5	2	1	1	0	5	4	3	2	5	2	2.9	1	4	3	2.476	1.308	2.256	0.024082	0.0426794	0	0.5471	0.2244	0.2244	TRUE	0.16	1.891	0.919	1.932	0.0533217	0.0926597	0	0.5471	0.2244	0.2244	TRUE	0.16
MD00G1125900	104	110	106	13	16	7	14	14	10	96	86	90	12	13	7	14	13	12	47.82	91	11	13	0.122	-3.036	-9.744	1.94912e-22	3.37588e-21	0	0.0413	0.0255	0.0255	TRUE	0.2412	0.149	-2.745	-8.983	2.64416e-19	4.29206e-18	0	0.0413	0.0255	0.0255	TRUE	0.2412
MD00G1126000	4	1	2	8	7	3	4	5	3	4	1	2	7	6	3	4	5	4	3.17	2	5	4	1.532	0.615	1.658	0.0973542	0.145522	0	0.5022	0.2294	0.2294	TRUE	0.1565	1.269	0.344	1.165	0.244162	0.335105	0	0.5022	0.2294	0.2294	TRUE	0.1565
MD00G1126100	2	0	7	9	20	10	5	5	3	2	0	6	8	16	10	5	5	4	5.72	3	11	5	2.776	1.473	2.883	0.00393299	0.00834535	0.088	0.2819	0.1998	0.1998	TRUE	0.8766	1.203	0.267	0.972	0.331033	0.429393	0.088	0.2819	0.1998	0.1998	TRUE	0.8766
MD00G1126200	394	451	366	302	271	300	166	187	140	363	354	310	280	220	288	170	171	166	256.38	342	263	169	0.796	-0.33	-1.955	0.0505274	0.0820845	0.0306	0.0147	0.0247	0.0247	TRUE	0.1703	0.521	-0.941	-5.062	4.14256e-07	1.98148e-06	0.0306	0.0147	0.0247	0.0247	TRUE	0.1703
MD00G1126400	0	0	0	0	1	2	0	0	0	0	0	0	0	1	2	0	0	0	0.3	0	1	0	1.228	0.296	0.72	0.471307	NA	0	5.1628	7.4716	7.4716	TRUE	0.0186	1	0	0	1	NA	0	5.1628	7.4716	7.4716	TRUE	0.0186
MD00G1126700	12	22	22	47	77	52	38	26	26	11	17	19	44	62	50	39	24	31	24.93	16	52	31	3.021	1.595	5.15	2.60584e-07	1.10159e-06	0	0.0713	0.0455	0.0455	TRUE	0.2513	1.657	0.728	2.79	0.00526529	0.0119897	0	0.0713	0.0455	0.0455	TRUE	0.2513
MD00G1126800	314	426	371	283	299	231	310	295	246	289	334	314	262	243	222	317	270	292	297.61	312	242	293	0.785	-0.35	-3.313	0.000923678	0.00222585	0	0.0139	0.0057	0.0057	TRUE	0.0287	0.941	-0.087	-0.863	0.387922	0.487829	0	0.0139	0.0057	0.0057	TRUE	0.0287
MD00G1126900	758	893	788	906	999	925	905	1005	789	698	701	668	840	810	889	924	921	938	753.6	689	846	928	1.22	0.287	3.466	0.00052803	0.00133294	0.0015	0.0107	0.0041	0.0041	TRUE	0.0588	1.329	0.41	5.013	5.365e-07	2.52954e-06	0.0015	0.0107	0.0041	0.0041	TRUE	0.0588
MD00G1127000	502	549	541	252	352	258	276	343	235	462	431	459	234	285	248	282	314	279	298.28	451	256	292	0.58	-0.787	-7.514	5.74132e-14	5.17509e-13	0	0.0139	0.0058	0.0058	TRUE	0.0614	0.664	-0.59	-5.742	9.35889e-09	5.61534e-08	0	0.0139	0.0058	0.0058	TRUE	0.0614
MD00G1127100	0	0	0	0	1	1	0	2	0	0	0	0	0	1	1	0	2	0	0.3	0	1	1	1.159	0.213	0.535	0.592969	NA	0	5.2131	7.5478	7.5478	TRUE	0.4867	1.155	0.208	0.554	0.579394	NA	0	5.2131	7.5478	7.5478	TRUE	0.4867
MD00G1127200	335	367	345	336	442	310	198	201	130	308	288	292	311	358	298	202	184	155	231.05	296	322	180	1.084	0.116	0.97	0.331944	0.417477	0.0054	0.0154	0.0092	0.0092	TRUE	0.1002	0.632	-0.663	-5.19	2.10457e-07	1.05017e-06	0.0054	0.0154	0.0092	0.0092	TRUE	0.1002
MD00G1127300	608	649	664	614	783	622	495	573	515	560	509	563	569	635	597	505	525	612	523.13	544	600	547	1.095	0.132	1.014	0.310639	0.395133	0.0143	0.0116	0.013	0.013	TRUE	0.3078	1.005	0.008	0.063	0.949577	0.967955	0.0143	0.0116	0.013	0.013	TRUE	0.3078
MD00G1127400	267	316	298	490	635	504	261	315	286	246	248	253	454	515	484	267	289	340	260.31	249	484	299	1.91	0.933	8.106	5.24469e-16	5.62804e-15	0	0.0146	0.0075	0.0075	TRUE	0.1081	1.175	0.233	2.097	0.0359863	0.0658712	0	0.0146	0.0075	0.0075	TRUE	0.1081
MD00G1127500	277	311	356	146	169	134	185	237	173	255	244	302	135	137	129	189	217	206	267.26	267	134	204	0.512	-0.965	-8.026	1.00819e-15	1.05695e-14	0	0.0145	0.0061	0.0061	TRUE	0.0745	0.783	-0.353	-3.235	0.00121548	0.00319844	0	0.0145	0.0061	0.0061	TRUE	0.0745
MD00G1127600	0	0	0	22	27	28	28	28	30	0	0	0	20	22	27	29	26	36	17.66	0	23	30	88.917	6.474	5.914	3.33336e-09	1.80094e-08	0	0.0972	0.0496	0.0496	TRUE	0.0987	113.51	6.827	6.226	4.78887e-10	3.35734e-09	0	0.0972	0.0496	0.0496	TRUE	0.0987
MD00G1127700	33	45	26	72	111	66	33	36	25	30	35	22	67	90	63	34	33	30	64.6	29	73	32	2.293	1.197	4.608	4.07162e-06	1.45126e-05	0.0435	0.0328	0.0394	0.0394	TRUE	0.0428	1.06	0.085	0.44	0.660007	0.737826	0.0435	0.0328	0.0394	0.0394	TRUE	0.0428
MD00G1127800	36	42	37	29	33	39	77	85	100	33	33	31	27	27	37	79	78	119	39.95	32	30	92	0.949	-0.075	-0.35	0.7262	0.786957	0.0221	0.0478	0.0337	0.0337	TRUE	0.3192	2.649	1.405	5.528	3.24646e-08	1.81147e-07	0.0221	0.0478	0.0337	0.0337	TRUE	0.3192
MD00G1127900	1579	1810	1643	1571	1860	1543	1299	1369	1097	1453	1420	1392	1456	1509	1482	1326	1255	1304	1318.18	1422	1482	1295	1.042	0.059	1.027	0.3043	0.388275	0	0.0098	0.0019	0.0019	TRUE	0.0046	0.913	-0.131	-2.254	0.0241993	0.0465246	0	0.0098	0.0019	0.0019	TRUE	0.0046
MD00G1128000	43	46	35	15	9	9	5	9	6	40	36	30	14	7	9	5	8	7	13.35	35	10	7	0.329	-1.606	-4.264	2.00857e-05	6.44907e-05	0	0.1257	0.0748	0.0748	TRUE	1.1005	0.221	-2.179	-4.963	6.92744e-07	3.207e-06	0	0.1257	0.0748	0.0748	TRUE	1.1005
MD00G1128100	891	973	943	932	953	857	595	702	450	820	763	799	864	773	823	608	644	535	719.02	794	820	596	1.031	0.044	0.501	0.616168	0.692075	0.0027	0.0108	0.0049	0.0049	TRUE	0.0444	0.763	-0.39	-4.393	1.12019e-05	4.29353e-05	0.0027	0.0108	0.0049	0.0049	TRUE	0.0444
MD00G1128200	356	376	389	303	331	261	248	293	239	328	295	330	281	268	251	253	269	284	288.1	318	267	269	0.849	-0.237	-2.317	0.0205288	0.0370012	0	0.014	0.0053	0.0053	TRUE	0.0292	0.858	-0.221	-2.206	0.0273897	0.0518694	0	0.014	0.0053	0.0053	TRUE	0.0292
MD00G1128300	1313	1451	1486	1494	2001	1497	1114	1394	1017	1209	1138	1259	1385	1623	1438	1138	1278	1209	1209.19	1202	1482	1208	1.225	0.293	3.546	0.000391566	0.00101076	0.003	0.0099	0.0046	0.0046	TRUE	0.0424	1.005	0.008	0.092	0.926588	0.950132	0.003	0.0099	0.0046	0.0046	TRUE	0.0424
MD00G1128400	8	14	12	2	5	5	3	5	4	7	11	10	2	4	5	3	5	5	4.3	9	4	4	0.585	-0.773	-2.068	0.0386806	0.0649708	0	0.372	0.1681	0.1681	TRUE	0.1397	0.677	-0.562	-1.766	0.0774333	0.127477	0	0.372	0.1681	0.1681	TRUE	0.1397
MD00G1128500	0	0	1	0	0	0	1	0	3	0	0	1	0	0	0	1	0	4	0.45	0	0	2	0.931	-0.103	-0.268	0.788975	NA	0	3.461	5.8322	5.8322	TRUE	0.0546	1.216	0.282	0.733	0.463429	NA	0	3.461	5.8322	5.8322	TRUE	0.0546
MD00G1128800	0	0	1	0	0	0	1	0	0	0	0	1	0	0	0	1	0	0	0.16	0	0	0	0.948	-0.076	-0.2	0.841335	NA	0	10.0493	12	12	TRUE	0.2117	1.016	0.023	0.065	0.947985	NA	0	10.0493	12	12	TRUE	0.2117
MD00G1129000	81	94	91	31	45	31	18	27	15	75	74	77	29	36	30	18	25	18	53.05	75	32	20	0.451	-1.149	-5.287	1.24514e-07	5.48511e-07	0	0.0381	0.0199	0.0199	TRUE	0.065	0.286	-1.805	-7.055	1.7229e-12	1.56929e-11	0	0.0381	0.0199	0.0199	TRUE	0.065
MD00G1129100	874	981	897	944	1010	901	853	944	726	805	770	760	875	819	866	871	865	863	707.58	778	853	866	1.089	0.123	1.014	0.310686	0.39518	0.0116	0.0108	0.0113	0.0113	TRUE	0.3777	1.1	0.137	1.183	0.236868	0.32691	0.0116	0.0108	0.0113	0.0113	TRUE	0.3777
MD00G1129200	749	869	817	657	781	628	575	625	496	689	682	692	609	633	603	587	573	590	606.75	688	615	583	0.898	-0.156	-2.087	0.0368604	0.0623225	0	0.0112	0.0029	0.0029	TRUE	0.0285	0.854	-0.228	-3.05	0.00228591	0.0056752	0	0.0112	0.0029	0.0029	TRUE	0.0285
MD00G1129300	465	556	541	491	713	600	413	484	319	428	436	459	455	578	576	422	444	379	459.94	441	536	415	1.188	0.249	1.593	0.111148	0.163416	0.0259	0.012	0.021	0.021	TRUE	0.2885	0.953	-0.07	-0.483	0.628933	0.711449	0.0259	0.012	0.021	0.021	TRUE	0.2885
MD00G1129400	82	87	71	0	0	0	0	0	0	75	68	60	0	0	0	0	0	0	36.27	68	0	0	0.004	-7.888	-7.252	4.10121e-13	3.40156e-12	0	0.0517	0.0273	0.0273	TRUE	0.0523	0.005	-7.701	-7.078	1.45763e-12	1.33616e-11	0	0.0517	0.0273	0.0273	TRUE	0.0523
MD00G1129500	0	4	5	0	0	0	1	1	1	0	3	4	0	0	0	1	1	1	12.86	2	0	1	0.163	-2.621	-2.984	0.00284672	0.00621948	0	0.1302	0.086	0.086	TRUE	0.3077	0.755	-0.404	-1.263	0.206537	0.291635	0	0.1302	0.086	0.086	TRUE	0.3077
MD00G1129700	357	363	331	311	344	344	259	298	257	329	285	281	288	279	330	264	273	305	300.62	298	299	281	1.004	0.006	0.049	0.960952	0.978207	0.0043	0.0138	0.0075	0.0075	TRUE	0.0511	0.948	-0.076	-0.698	0.485449	0.583139	0.0043	0.0138	0.0075	0.0075	TRUE	0.0511
MD00G1129800	18	11	20	22	48	24	16	29	15	17	9	17	20	39	23	16	27	18	17.24	14	27	20	1.565	0.646	2.168	0.030132	0.0520214	0.1028	0.0993	0.1011	0.1011	TRUE	0.9365	1.209	0.274	1.165	0.2439	0.334807	0.1028	0.0993	0.1011	0.1011	TRUE	0.9365
MD00G1129900	32	57	40	0	1	0	23	13	14	29	45	34	0	1	0	23	12	17	13.62	36	0	17	0.015	-6.092	-5.52	3.38536e-08	1.61103e-07	0.037	0.1234	0.0856	0.0856	TRUE	0.4521	0.605	-0.726	-2.528	0.0114649	0.0240563	0.037	0.1234	0.0856	0.0856	TRUE	0.4521
MD00G1130000	73	85	77	54	80	63	49	39	42	67	67	65	50	65	61	50	36	50	50.76	66	59	45	0.903	-0.147	-0.792	0.428235	0.516175	0.0048	0.0394	0.0232	0.0232	TRUE	0.2919	0.74	-0.434	-2.354	0.0185559	0.0368509	0.0048	0.0394	0.0232	0.0232	TRUE	0.2919
MD00G1130100	238	309	257	586	623	594	504	592	466	219	242	218	543	505	571	515	543	554	423.27	226	540	537	2.336	1.224	9.195	3.7429e-20	5.5408e-19	0.0098	0.0123	0.0106	0.0106	TRUE	0.1203	2.331	1.221	9.102	8.87821e-20	1.48262e-18	0.0098	0.0123	0.0106	0.0106	TRUE	0.1203
MD00G1130200	0	1	1	1	0	0	0	0	0	0	1	1	1	0	0	0	0	0	8.73	1	0	0	0.888	-0.171	-0.502	0.615443	0.691469	0	0.1876	0.1197	0.1197	TRUE	0.2105	0.794	-0.333	-0.97	0.332039	0.43043	0	0.1876	0.1197	0.1197	TRUE	0.2105
MD00G1130400	0	0	0	0	0	0	0	0	0	0	0	0	0	0	0	0	0	0	0	0	0	0	1	0	NA	NA	NA	NA	NA	NA	NA	NA	NA	1	0	NA	NA	NA	NA	NA	NA	NA	NA	NA
MD00G1130500	597	688	635	601	669	620	581	616	563	550	540	538	557	543	596	593	565	669	640.55	543	565	609	1.04	0.056	0.67	0.502908	0.588811	0.001	0.0111	0.0038	0.0038	TRUE	0.0421	1.113	0.155	1.883	0.0597518	0.102134	0.001	0.0111	0.0038	0.0038	TRUE	0.0421
MD00G1130600	335	327	342	91	123	108	132	155	92	308	257	290	84	100	104	135	142	109	138.93	285	96	129	0.344	-1.539	-9.87	5.64297e-23	1.01361e-21	0.0061	0.0199	0.012	0.012	TRUE	0.1415	0.466	-1.102	-7.296	2.96723e-13	2.9334e-12	0.0061	0.0199	0.012	0.012	TRUE	0.1415
MD00G1130700	50	48	36	39	56	47	31	36	25	46	38	31	36	45	45	32	33	30	40.52	38	42	32	1.09	0.124	0.64	0.521891	0.606782	0	0.0472	0.0212	0.0212	TRUE	0.1217	0.88	-0.185	-1.024	0.305649	0.402559	0	0.0472	0.0212	0.0212	TRUE	0.1217
MD00G1130800	2	1	2	0	0	0	0	1	0	2	1	2	0	0	0	0	1	0	0.44	2	0	0	0.676	-0.564	-1.221	0.222265	NA	0	3.5912	3.4176	3.4176	TRUE	0.1613	0.821	-0.285	-0.763	0.445399	NA	0	3.5912	3.4176	3.4176	TRUE	0.1613
MD00G1130900	1092	1263	1228	1375	1693	1256	1406	1668	1328	1005	991	1041	1274	1373	1207	1436	1529	1579	1253.19	1012	1285	1515	1.252	0.325	2.947	0.00321058	0.00692998	0.0088	0.0099	0.0091	0.0091	TRUE	0.1972	1.458	0.544	4.976	6.47629e-07	3.01461e-06	0.0088	0.0099	0.0091	0.0091	TRUE	0.1972
MD00G1131000	17	31	16	7	12	19	7	2	7	16	24	14	6	10	18	7	2	8	13.61	18	11	6	0.778	-0.361	-1.284	0.19928	0.27038	0.1178	0.1235	0.1206	0.1206	TRUE	0.5003	0.437	-1.196	-2.924	0.00345058	0.0082308	0.1178	0.1235	0.1206	0.1206	TRUE	0.5003
MD00G1131100	0	0	0	1	2	1	0	0	1	0	0	0	1	2	1	0	0	1	0.54	0	1	0	1.524	0.608	1.309	0.19045	NA	0	2.8889	2.1837	2.1837	TRUE	0.4631	1.133	0.181	0.519	0.604096	NA	0	2.8889	2.1837	2.1837	TRUE	0.4631
MD00G1131200	201	250	233	165	181	168	195	190	143	185	196	197	153	147	161	199	174	170	172.05	193	154	181	0.808	-0.307	-2.547	0.0108704	0.0209487	0	0.0177	0.007	0.007	TRUE	0.0671	0.946	-0.08	-0.701	0.483504	0.581383	0	0.0177	0.007	0.007	TRUE	0.0671
MD00G1131300	28	40	27	34	38	25	41	35	28	26	31	23	32	31	24	42	32	33	47.58	27	29	36	1.058	0.081	0.384	0.700817	0.765546	0	0.0415	0.0267	0.0267	TRUE	0.0536	1.219	0.286	1.484	0.137866	0.207897	0	0.0415	0.0267	0.0267	TRUE	0.0536
MD00G1131600	297	301	336	328	363	276	277	299	234	273	236	285	304	294	265	283	274	278	297.2	265	288	278	1.083	0.115	1.034	0.300968	0.384537	0.0035	0.0139	0.007	0.007	TRUE	0.064	1.047	0.066	0.611	0.54139	0.634816	0.0035	0.0139	0.007	0.007	TRUE	0.064
MD00G1131800	43	70	63	0	0	0	0	0	0	40	55	53	0	0	0	0	0	0	30.78	49	0	0	0.006	-7.449	-6.842	7.81735e-12	5.65536e-11	0	0.0594	0.0334	0.0334	TRUE	0.1202	0.007	-7.261	-6.669	2.57822e-11	2.08325e-10	0	0.0594	0.0334	0.0334	TRUE	0.1202
MD00G1131900	37	26	30	18	26	17	19	28	16	34	20	25	17	21	16	19	26	19	23.9	26	18	21	0.763	-0.391	-1.655	0.0979159	0.146192	0	0.0741	0.0376	0.0376	TRUE	0.1723	0.882	-0.182	-0.908	0.363849	0.463671	0	0.0741	0.0376	0.0376	TRUE	0.1723
MD00G1132000	0	0	0	0	0	0	0	0	0	0	0	0	0	0	0	0	0	0	0	0	0	0	1	0	NA	NA	NA	NA	NA	NA	NA	NA	NA	1	0	NA	NA	NA	NA	NA	NA	NA	NA	NA
MD00G1132100	0	0	0	0	0	2	2	1	1	0	0	0	0	0	2	2	1	1	0.69	0	1	1	1.296	0.374	0.934	0.35049	NA	0	2.2832	1.5407	1.5407	TRUE	0.4874	1.683	0.751	1.563	0.118094	NA	0	2.2832	1.5407	1.5407	TRUE	0.4874
MD00G1132200	0	0	0	0	0	0	0	0	0	0	0	0	0	0	0	0	0	0	0	0	0	0	1	0	NA	NA	NA	NA	NA	NA	NA	NA	NA	1	0	NA	NA	NA	NA	NA	NA	NA	NA	NA
MD00G1132300	392	428	388	357	481	343	352	383	310	361	336	329	331	390	329	359	351	368	364.44	342	350	359	1.025	0.035	0.319	0.750082	0.807604	0.005	0.0129	0.0075	0.0075	TRUE	0.0823	1.047	0.066	0.617	0.537101	0.631037	0.005	0.0129	0.0075	0.0075	TRUE	0.0823
MD00G1132400	139	161	146	99	84	74	42	55	68	128	126	124	92	68	71	43	50	81	79.41	126	77	58	0.65	-0.623	-3.419	0.000627719	0.00156291	0.0162	0.0283	0.0221	0.0221	TRUE	0.4542	0.481	-1.056	-5.184	2.1774e-07	1.08485e-06	0.0162	0.0283	0.0221	0.0221	TRUE	0.4542
MD00G1132500	0	0	0	0	0	0	0	0	0	0	0	0	0	0	0	0	0	0	0	0	0	0	1	0	NA	NA	NA	NA	NA	NA	NA	NA	NA	1	0	NA	NA	NA	NA	NA	NA	NA	NA	NA
MD00G1132600	327	411	309	298	274	262	260	346	227	301	322	262	276	222	252	266	317	270	360.8	295	250	284	0.862	-0.214	-1.443	0.149153	0.210783	0.0188	0.013	0.0168	0.0168	TRUE	0.1147	0.97	-0.044	-0.318	0.750639	0.81363	0.0188	0.013	0.0168	0.0168	TRUE	0.1147
MD00G1133000	0	0	0	0	0	0	0	0	0	0	0	0	0	0	0	0	0	0	0	0	0	0	1	0	NA	NA	NA	NA	NA	NA	NA	NA	NA	1	0	NA	NA	NA	NA	NA	NA	NA	NA	NA
MD00G1133100	0	0	0	0	0	0	0	0	0	0	0	0	0	0	0	0	0	0	0	0	0	0	1	0	NA	NA	NA	NA	NA	NA	NA	NA	NA	1	0	NA	NA	NA	NA	NA	NA	NA	NA	NA
MD00G1133200	15	16	23	8	37	20	18	18	21	14	13	19	7	30	19	18	17	25	29.8	15	19	20	1.148	0.199	0.796	0.425782	0.513749	0.0716	0.0611	0.066	0.066	TRUE	0.2415	1.148	0.199	0.915	0.360294	0.460194	0.0716	0.0611	0.066	0.066	TRUE	0.2415
MD00G1133300	257	334	237	1370	1659	1320	2615	2363	1995	237	262	201	1270	1346	1268	2670	2166	2371	1783.58	233	1295	2402	5.479	2.454	14.733	3.9681e-49	2.51651e-47	0.021	0.0095	0.0181	0.0181	TRUE	0.0549	10.225	3.354	20.114	5.55387e-90	1.14422e-87	0.021	0.0095	0.0181	0.0181	TRUE	0.0549
MD00G1133400	3	2	1	0	1	0	0	2	0	3	2	1	0	1	0	0	2	0	2.37	2	0	1	0.6	-0.737	-1.594	0.110843	0.163006	0	0.6691	0.3978	0.3978	TRUE	0.4302	0.805	-0.313	-0.962	0.336282	0.434946	0	0.6691	0.3978	0.3978	TRUE	0.4302
MD00G1133500	9	12	13	7	11	7	18	24	23	8	9	11	6	9	7	18	22	27	52.95	9	7	22	0.866	-0.208	-0.787	0.431163	0.519016	0	0.0382	0.0531	0.0531	TRUE	0.0149	1.902	0.927	3.002	0.00268047	0.00655013	0	0.0382	0.0531	0.0531	TRUE	0.0149
MD00G1133600	0	1	1	0	0	1	2	1	0	0	1	1	0	0	1	2	1	0	0.46	1	0	1	0.922	-0.117	-0.319	0.749901	NA	0	3.3883	2.5483	2.5483	TRUE	0.0839	1.091	0.125	0.372	0.710018	NA	0	3.3883	2.5483	2.5483	TRUE	0.0839
MD00G1133700	40	49	27	89	118	92	93	142	69	37	38	23	82	96	88	95	130	82	67.59	33	89	102	2.571	1.363	5.95	2.68708e-09	1.46858e-08	0.0186	0.0318	0.0243	0.0243	TRUE	0.2035	3.015	1.592	6.822	8.95002e-12	7.60762e-11	0.0186	0.0318	0.0243	0.0243	TRUE	0.2035
MD00G1133800	1	0	0	0	0	0	0	0	0	1	0	0	0	0	0	0	0	0	0.08	0	0	0	0.948	-0.076	-0.2	0.841337	NA	0	20.3917	12	12	TRUE	0.251	0.963	-0.055	-0.153	0.878411	NA	0	20.3917	12	12	TRUE	0.251
MD00G1134000	294	326	315	330	360	321	754	917	645	271	256	267	306	292	308	770	841	767	343.47	265	302	793	1.135	0.183	1.863	0.0624871	0.0987475	0	0.0132	0.0045	0.0045	TRUE	0.1794	2.981	1.576	16.318	7.39658e-60	6.94757e-58	0	0.0132	0.0045	0.0045	TRUE	0.1794
MD00G1134100	0	0	0	0	0	0	0	0	0	0	0	0	0	0	0	0	0	0	0.41	0	0	0	1	0	0	1	NA	0	3.8224	5.5814	5.5814	TRUE	0.0304	1	0	0	1	NA	0	3.8224	5.5814	5.5814	TRUE	0.0304
MD00G1134200	0	1	0	0	0	0	0	0	0	0	1	0	0	0	0	0	0	0	0.14	0	0	0	0.948	-0.076	-0.2	0.841335	NA	0	11.0946	12	12	TRUE	0.1785	0.963	-0.055	-0.153	0.87841	NA	0	11.0946	12	12	TRUE	0.1785
MD00G1134400	63	63	71	400	481	392	688	779	479	58	49	60	371	390	377	703	714	569	327.13	56	379	662	6.751	2.755	18.246	2.2441e-74	3.14596e-72	0	0.0134	0.0078	0.0078	TRUE	0.0856	11.836	3.565	23.851	9.80003e-126	3.92949e-123	0	0.0134	0.0078	0.0078	TRUE	0.0856
MD00G1134500	0	0	0	0	0	0	0	0	0	0	0	0	0	0	0	0	0	0	0	0	0	0	1	0	NA	NA	NA	NA	NA	NA	NA	NA	NA	1	0	NA	NA	NA	NA	NA	NA	NA	NA	NA
MD00G1134600	108	141	118	263	297	240	242	241	175	99	111	100	244	241	231	247	221	208	179.77	103	239	225	2.243	1.165	7.711	1.252e-14	1.19558e-13	0.0076	0.0173	0.0116	0.0116	TRUE	0.2426	2.124	1.087	7.114	1.12578e-12	1.04611e-11	0.0076	0.0173	0.0116	0.0116	TRUE	0.2426
MD00G1134700	46	57	48	98	91	114	100	98	55	42	45	41	91	74	110	102	90	65	70.6	43	92	86	1.964	0.974	4.296	1.73632e-05	5.63853e-05	0.0331	0.0308	0.0321	0.0321	TRUE	0.1988	1.844	0.883	3.929	8.52362e-05	0.000281031	0.0331	0.0308	0.0321	0.0321	TRUE	0.1988
MD00G1134800	512	651	518	265	267	249	338	381	367	471	511	439	246	217	239	345	349	436	322.08	474	234	377	0.506	-0.984	-7.442	9.95266e-14	8.75731e-13	0.0092	0.0135	0.0107	0.0107	TRUE	0.13	0.814	-0.296	-2.481	0.0131183	0.0270955	0.0092	0.0135	0.0107	0.0107	TRUE	0.13
MD00G1134900	0	0	0	0	0	0	0	0	0	0	0	0	0	0	0	0	0	0	0	0	0	0	1	0	NA	NA	NA	NA	NA	NA	NA	NA	NA	1	0	NA	NA	NA	NA	NA	NA	NA	NA	NA
MD00G1135400	692	797	683	519	619	512	670	768	495	637	625	579	481	502	492	684	704	588	708.91	614	492	659	0.823	-0.28	-1.785	0.0741874	0.114833	0.027	0.0108	0.0215	0.0215	TRUE	0.1448	1.06	0.083	0.579	0.562862	0.653933	0.027	0.0108	0.0215	0.0215	TRUE	0.1448
MD00G1135500	8	8	11	56	60	45	3	7	11	7	6	9	52	49	43	3	6	13	15.78	7	48	7	5.777	2.53	6.158	7.37951e-10	4.30308e-09	0	0.1077	0.0686	0.0686	TRUE	0.4792	0.981	-0.027	-0.123	0.902307	0.931338	0	0.1077	0.0686	0.0686	TRUE	0.4792
MD00G1135600	213	224	246	501	576	500	562	610	458	196	176	208	464	467	480	574	559	544	796.84	193	470	559	2.384	1.254	8.9	5.57915e-19	7.59571e-18	0.0124	0.0106	0.0118	0.0118	TRUE	0.0472	2.85	1.511	10.637	2.00442e-26	5.04693e-25	0.0124	0.0106	0.0118	0.0118	TRUE	0.0472
MD00G1135700	85	106	105	47	55	61	40	56	28	78	83	89	44	45	59	41	51	33	55.66	83	49	42	0.624	-0.68	-3.633	0.000280681	0.000745484	0	0.0367	0.0186	0.0186	TRUE	0.1609	0.542	-0.883	-4.4	1.08355e-05	4.16337e-05	0	0.0367	0.0186	0.0186	TRUE	0.1609
MD00G1135800	44	51	42	8	10	8	5	5	3	41	40	36	7	8	8	5	5	4	14.58	39	8	5	0.219	-2.189	-5.768	8.00453e-09	4.11766e-08	0	0.1159	0.0478	0.0478	TRUE	0.1086	0.125	-3.002	-6.335	2.376e-10	1.72477e-09	0	0.1159	0.0478	0.0478	TRUE	0.1086
MD00G1135900	28	30	35	5	9	10	1	1	4	26	24	30	5	7	10	1	1	5	9.36	27	7	2	0.339	-1.56	-3.732	0.000189642	0.00051835	0	0.1757	0.1034	0.1034	TRUE	0.4779	0.093	-3.431	-5.124	2.99183e-07	1.46277e-06	0	0.1757	0.1034	0.1034	TRUE	0.4779
MD00G1136000	57	69	82	31	29	14	8	20	14	52	54	69	29	24	13	8	18	17	28.28	58	22	14	0.433	-1.206	-3.855	0.000115938	0.000329121	0.0767	0.0639	0.0699	0.0699	TRUE	0.5881	0.271	-1.883	-5.118	3.08923e-07	1.50782e-06	0.0767	0.0639	0.0699	0.0699	TRUE	0.5881
MD00G1136100	30	19	19	29	21	19	11	13	10	28	15	16	27	17	18	11	12	12	15.34	20	21	12	1.041	0.058	0.239	0.811457	0.858418	0	0.1106	0.0617	0.0617	TRUE	0.3595	0.744	-0.426	-1.738	0.0822386	0.134362	0	0.1106	0.0617	0.0617	TRUE	0.3595
MD00G1136200	30	38	21	21	10	17	13	8	10	28	30	18	19	8	16	13	7	12	15.44	25	14	11	0.697	-0.521	-1.901	0.0572801	0.0916177	0	0.1099	0.077	0.077	TRUE	0.4146	0.547	-0.871	-2.758	0.00580947	0.0130834	0	0.1099	0.077	0.077	TRUE	0.4146
MD00G1136300	81	92	93	238	255	195	101	109	86	75	72	79	221	207	187	103	100	102	630.26	75	205	102	2.686	1.425	10.613	2.59645e-26	5.78384e-25	0	0.0111	0.0056	0.0056	TRUE	0.0107	1.304	0.383	2.902	0.00370354	0.00877135	0	0.0111	0.0056	0.0056	TRUE	0.0107
MD00G1136400	56	68	52	94	79	71	94	70	70	52	53	44	87	64	68	96	64	83	99.64	50	73	81	1.371	0.455	2.296	0.0216498	0.0388134	0.0295	0.0243	0.0275	0.0275	TRUE	0.3425	1.478	0.563	2.897	0.00376159	0.0088935	0.0295	0.0243	0.0275	0.0275	TRUE	0.3425
MD00G1136500	434	548	530	513	717	527	518	579	445	399	430	449	475	582	506	529	531	529	664.35	426	521	530	1.212	0.277	2.769	0.00562345	0.0115492	0.0042	0.011	0.0061	0.0061	TRUE	0.0557	1.222	0.289	2.954	0.00314136	0.0075575	0.0042	0.011	0.0061	0.0061	TRUE	0.0557
MD00G1136600	1154	1270	1315	1038	1316	1068	640	642	586	1062	996	1114	962	1067	1026	654	589	697	778.82	1057	1018	647	0.965	-0.051	-0.466	0.641461	0.71431	0.0087	0.0106	0.0089	0.0089	TRUE	0.1632	0.626	-0.676	-6.014	1.8055e-09	1.18159e-08	0.0087	0.0106	0.0089	0.0089	TRUE	0.1632
MD00G1136700	9	11	8	79	72	60	105	140	91	8	9	7	73	58	58	107	128	108	71.84	8	63	114	7.638	2.933	8.389	4.89364e-17	5.71154e-16	0	0.0304	0.0311	0.0311	TRUE	0.1496	14.071	3.815	10.966	5.57166e-28	1.53221e-26	0	0.0304	0.0311	0.0311	TRUE	0.1496
MD00G1136800	82	82	70	84	106	103	88	95	52	75	64	59	78	86	99	90	87	62	78.48	66	88	80	1.272	0.347	2.08	0.0375085	0.0633007	0	0.0285	0.0153	0.0153	TRUE	0.1573	1.162	0.216	1.388	0.165197	0.242203	0	0.0285	0.0153	0.0153	TRUE	0.1573
MD00G1137100	0	0	0	0	0	0	0	2	1	0	0	0	0	0	0	0	2	1	0.25	0	0	1	1	0	0	1	NA	0	6.217	12	12	TRUE	0.0181	1.176	0.234	0.622	0.534266	NA	0	6.217	12	12	TRUE	0.0181
MD00G1137200	146	197	129	145	168	145	251	217	173	134	155	109	134	136	139	256	199	206	177.7	133	136	220	1.025	0.035	0.243	0.807637	0.855153	0.0097	0.0174	0.0126	0.0126	TRUE	0.1276	1.586	0.665	4.596	4.29808e-06	1.7603e-05	0.0097	0.0174	0.0126	0.0126	TRUE	0.1276
MD00G1137300	217	304	251	115	111	110	163	169	141	200	238	213	107	90	106	166	155	168	296.4	217	101	163	0.471	-1.085	-8.588	8.86103e-18	1.09377e-16	0	0.0139	0.0057	0.0057	TRUE	0.0473	0.768	-0.381	-3.406	0.000658298	0.00183604	0	0.0139	0.0057	0.0057	TRUE	0.0473
MD00G1137500	704	765	739	836	1066	815	913	1002	750	648	600	626	775	865	783	932	919	892	1375.68	625	808	914	1.286	0.362	4.809	1.51319e-06	5.76255e-06	0.0011	0.0098	0.0031	0.0031	TRUE	0.0235	1.447	0.534	7.105	1.20422e-12	1.11456e-11	0.0011	0.0098	0.0031	0.0031	TRUE	0.0235
MD00G1137700	2	1	1	0	1	2	0	1	0	2	1	1	0	1	2	0	1	0	0.59	1	1	0	0.957	-0.063	-0.184	0.853708	NA	0	2.6431	1.6562	1.6562	TRUE	0.0881	0.823	-0.281	-0.795	0.426427	NA	0	2.6431	1.6562	1.6562	TRUE	0.0881
MD00G1137800	405	507	416	354	352	321	301	283	197	373	398	353	328	285	308	307	259	234	307.65	375	307	267	0.847	-0.24	-1.367	0.171493	0.237538	0.038	0.0137	0.0288	0.0288	TRUE	0.4249	0.764	-0.388	-2.315	0.0206105	0.0403976	0.038	0.0137	0.0288	0.0288	TRUE	0.4249
MD00G1137900	0	0	0	1	0	0	0	0	0	0	0	0	1	0	0	0	0	0	0.08	0	0	0	1.065	0.09	0.236	0.813237	NA	0	20.255	12	12	TRUE	0.2275	1	0	0	1	NA	0	20.255	12	12	TRUE	0.2275
MD00G1138000	1	1	1	0	3	0	11	9	4	1	1	1	0	2	0	11	8	5	5.68	1	1	8	1.01	0.015	0.047	0.962793	0.979392	0	0.2837	0.1545	0.1545	TRUE	0.5282	5.617	2.49	3.273	0.00106549	0.00283942	0	0.2837	0.1545	0.1545	TRUE	0.5282
MD00G1138200	1189	1233	1388	1240	1521	1276	1206	1500	1029	1094	967	1176	1149	1234	1226	1232	1375	1223	1141.21	1079	1203	1277	1.107	0.146	1.272	0.203507	0.275455	0.01	0.01	0.0102	0.0102	TRUE	0.152	1.163	0.218	1.969	0.0489272	0.0860002	0.01	0.01	0.0102	0.0102	TRUE	0.152
MD00G1138300	4364	5136	4718	5853	6899	5901	4944	5879	3963	4017	4029	3999	5424	5595	5669	5049	5389	4711	4518.06	4015	5563	5050	1.379	0.463	7.889	3.04335e-15	3.06389e-14	0.0009	0.009	0.0024	0.0024	TRUE	0.0212	1.251	0.323	5.535	3.10712e-08	1.73788e-07	0.0009	0.009	0.0024	0.0024	TRUE	0.0212
MD00G1138500	0	0	0	0	0	0	0	0	0	0	0	0	0	0	0	0	0	0	0	0	0	0	1	0	NA	NA	NA	NA	NA	NA	NA	NA	NA	1	0	NA	NA	NA	NA	NA	NA	NA	NA	NA
MD00G1138600	0	0	0	0	0	0	0	0	0	0	0	0	0	0	0	0	0	0	0	0	0	0	1	0	NA	NA	NA	NA	NA	NA	NA	NA	NA	1	0	NA	NA	NA	NA	NA	NA	NA	NA	NA
MD00G1138700	5	5	5	6	3	4	0	0	0	5	4	4	6	2	4	0	0	0	2.05	4	4	0	0.975	-0.037	-0.124	0.900967	0.931363	0	0.7714	0.4046	0.4046	TRUE	0.0449	0.119	-3.065	-3.099	0.00194027	0.00489294	0	0.7714	0.4046	0.4046	TRUE	0.0449
MD00G1139000	1753	2151	1733	2725	2592	2502	2092	2125	1539	1614	1687	1469	2525	2102	2403	2136	1948	1829	1497.99	1590	2343	1971	1.452	0.538	5.583	2.36025e-08	1.14841e-07	0.0057	0.0097	0.0068	0.0068	TRUE	0.0496	1.222	0.289	3.083	0.00204856	0.00513758	0.0057	0.0097	0.0068	0.0068	TRUE	0.0496
MD00G1139200	0	0	0	0	1	0	0	0	0	0	0	0	0	1	0	0	0	0	0.07	0	0	0	1.065	0.09	0.236	0.813237	NA	0	23.1429	12	12	TRUE	0.1698	1	0	0	1	NA	0	23.1429	12	12	TRUE	0.1698
MD00G1139300	2225	2602	2338	2583	3033	2610	2724	2934	2045	2048	2041	1981	2394	2460	2507	2782	2690	2431	2201.45	2023	2454	2634	1.207	0.272	3.95	7.80554e-05	0.000228092	0.0014	0.0093	0.0032	0.0032	TRUE	0.0271	1.291	0.369	5.406	6.44975e-08	3.44227e-07	0.0014	0.0093	0.0032	0.0032	TRUE	0.0271
MD00G1139400	81	80	65	29	32	24	42	25	40	75	63	55	27	26	23	43	23	48	42.14	64	25	38	0.433	-1.208	-4.637	3.53991e-06	1.27429e-05	0.027	0.0457	0.0357	0.0357	TRUE	0.4547	0.659	-0.601	-2.787	0.00532325	0.0121098	0.027	0.0457	0.0357	0.0357	TRUE	0.4547
MD00G1139500	0	0	0	1	0	0	0	0	0	0	0	0	1	0	0	0	0	0	0.08	0	0	0	1.065	0.09	0.236	0.813237	NA	0	20.255	12	12	TRUE	0.2275	1	0	0	1	NA	0	20.255	12	12	TRUE	0.2275
MD00G1139600	77	122	101	14	12	10	78	74	74	71	96	86	13	10	10	80	68	88	114.87	84	11	79	0.132	-2.924	-9.486	2.39434e-21	3.82869e-20	0	0.0222	0.024	0.024	TRUE	0.023	0.946	-0.08	-0.486	0.627092	0.70984	0	0.0222	0.024	0.024	TRUE	0.023
MD00G1139700	0	0	0	0	0	0	0	0	0	0	0	0	0	0	0	0	0	0	0	0	0	0	1	0	NA	NA	NA	NA	NA	NA	NA	NA	NA	1	0	NA	NA	NA	NA	NA	NA	NA	NA	NA
MD00G1139800	4	7	5	15	24	19	63	82	55	4	5	4	14	19	18	64	75	65	34.39	4	17	68	3.205	1.68	4.114	3.88793e-05	0.000119247	0	0.0541	0.0396	0.0396	TRUE	0.499	14.424	3.85	8.863	7.78999e-19	1.22569e-17	0	0.0541	0.0396	0.0396	TRUE	0.499
MD00G1139900	882	1023	905	547	627	513	993	1270	751	812	802	767	507	509	493	1014	1164	893	596.31	794	503	1024	0.645	-0.632	-6.067	1.30187e-09	7.40493e-09	0.0052	0.0112	0.0071	0.0071	TRUE	0.0426	1.268	0.343	3.479	0.000502567	0.00143629	0.0052	0.0112	0.0071	0.0071	TRUE	0.0426
MD00G1140000	408	573	467	624	752	530	489	524	335	376	449	396	578	610	509	499	480	398	527.51	407	566	459	1.353	0.437	3.246	0.0011689	0.00275735	0.0146	0.0116	0.0136	0.0136	TRUE	0.0685	1.11	0.151	1.186	0.235625	0.325435	0.0146	0.0116	0.0136	0.0136	TRUE	0.0685
MD00G1140100	1245	1423	889	1299	3628	623	855	2209	706	1146	1116	753	1204	2942	598	873	2025	839	1062.82	1005	1581	1246	1.257	0.33	1.135	0.256438	0.33593	0.2386	0.0101	0.1272	0.2386	TRUE	0.2099	1.091	0.126	0.537	0.59106	0.678152	0.2386	0.0101	0.1272	0.2386	TRUE	0.2099
MD00G1140200	2267	2687	2267	1317	1418	1261	1309	1373	962	2087	2108	1921	1220	1150	1211	1337	1259	1144	1407.82	2039	1194	1247	0.592	-0.758	-9.66	4.47183e-22	7.51868e-21	0.0023	0.0097	0.004	0.004	TRUE	0.0302	0.619	-0.692	-8.827	1.07326e-18	1.67386e-17	0.0023	0.0097	0.004	0.004	TRUE	0.0302
MD00G1140300	247	265	250	135	154	118	145	174	143	227	208	212	125	125	113	148	160	170	161.09	216	121	159	0.578	-0.791	-6.285	3.27742e-10	1.98723e-09	0	0.0183	0.0069	0.0069	TRUE	0.0543	0.759	-0.398	-3.388	0.000703683	0.00194922	0	0.0183	0.0069	0.0069	TRUE	0.0543
MD00G1140400	0	0	1	0	0	0	0	0	0	0	0	1	0	0	0	0	0	0	0.07	0	0	0	0.948	-0.076	-0.2	0.841337	NA	0	22.1474	12	12	TRUE	0.2117	0.963	-0.055	-0.153	0.878411	NA	0	22.1474	12	12	TRUE	0.2117
MD00G1140500	804	942	949	859	949	867	864	975	843	740	739	804	796	770	833	882	894	1002	646.14	761	800	926	1.044	0.062	0.403	0.686593	0.753696	0.0317	0.011	0.0211	0.0211	TRUE	1.1167	1.175	0.232	1.609	0.107703	0.168899	0.0317	0.011	0.0211	0.0211	TRUE	1.1167
MD00G1140600	439	476	492	409	470	403	275	324	229	404	373	417	379	381	387	281	297	272	317.85	398	382	283	0.964	-0.053	-0.403	0.687036	0.754038	0.0119	0.0135	0.0126	0.0126	TRUE	0.4168	0.74	-0.435	-3.34	0.0008384	0.00228705	0.0119	0.0135	0.0126	0.0126	TRUE	0.4168
MD00G1140700	1844	2000	1805	1704	1820	1631	1520	1766	1371	1697	1569	1530	1579	1476	1567	1552	1619	1630	1863.15	1599	1541	1600	0.965	-0.052	-0.662	0.508121	0.593679	0.0027	0.0095	0.0041	0.0041	TRUE	0.0349	1.001	0.002	0.021	0.983438	0.992924	0.0027	0.0095	0.0041	0.0041	TRUE	0.0349
MD00G1140800	903	1134	913	912	1264	1049	937	1078	715	831	890	774	845	1025	1008	957	988	850	1094.76	832	959	932	1.145	0.196	1.915	0.0555057	0.089139	0.0064	0.0101	0.0074	0.0074	TRUE	0.0646	1.11	0.151	1.523	0.127719	0.19499	0.0064	0.0101	0.0074	0.0074	TRUE	0.0646
MD00G1140900	0	0	0	1	0	0	0	0	0	0	0	0	1	0	0	0	0	0	0.08	0	0	0	1.065	0.09	0.236	0.813237	NA	0	20.255	12	12	TRUE	0.2275	1	0	0	1	NA	0	20.255	12	12	TRUE	0.2275
MD00G1141100	38	41	31	8	8	12	6	5	5	35	32	26	7	6	12	6	5	6	11.87	31	8	6	0.312	-1.68	-4.414	1.01494e-05	3.41674e-05	0	0.1404	0.065	0.065	TRUE	0.1547	0.199	-2.326	-5.105	3.29926e-07	1.60278e-06	0	0.1404	0.065	0.065	TRUE	0.1547
MD00G1141200	13	12	17	0	0	1	0	1	0	12	9	14	0	0	1	0	1	0	3.14	12	0	0	0.052	-4.256	-3.783	0.000155123	0.000430911	0	0.5068	0.3328	0.3328	TRUE	0.19	0.063	-3.999	-3.632	0.000281501	0.000844163	0	0.5068	0.3328	0.3328	TRUE	0.19
MD00G1141300	20	31	18	0	0	0	0	0	0	18	24	15	0	0	0	0	0	0	4.83	19	0	0	0.015	-6.034	-5.153	2.56128e-07	1.0846e-06	0	0.3322	0.2602	0.2602	TRUE	0.039	0.017	-5.838	-4.997	5.81685e-07	2.72569e-06	0	0.3322	0.2602	0.2602	TRUE	0.039
MD00G1141400	7	6	7	6	1	2	0	4	3	6	5	6	6	1	2	0	4	4	3.13	6	3	3	0.768	-0.381	-1.137	0.255391	0.334746	0.1667	0.5088	0.3843	0.3843	TRUE	0.5161	0.755	-0.405	-1.282	0.199685	0.283646	0.1667	0.5088	0.3843	0.3843	TRUE	0.5161
MD00G1141500	5	4	6	11	5	1	4	9	4	5	3	5	10	4	1	4	8	5	4.94	4	5	6	1.069	0.096	0.329	0.742419	0.800972	0.1544	0.3248	0.2371	0.2371	TRUE	0.2387	1.104	0.143	0.565	0.571791	0.661621	0.1544	0.3248	0.2371	0.2371	TRUE	0.2387
MD00G1141600	0	0	0	0	1	0	1	0	0	0	0	0	0	1	0	1	0	0	0.33	0	0	0	1.097	0.134	0.351	0.725872	NA	0	4.6849	4.3562	4.3562	TRUE	0.2059	1.111	0.152	0.421	0.673995	NA	0	4.6849	4.3562	4.3562	TRUE	0.2059
MD00G1141700	719	819	686	1067	1030	916	608	705	399	662	642	581	989	835	880	621	646	474	665.15	628	901	580	1.404	0.489	4.158	3.20507e-05	9.97221e-05	0.0097	0.011	0.0101	0.0101	TRUE	0.1457	0.934	-0.099	-0.878	0.379745	0.479633	0.0097	0.011	0.0101	0.0101	TRUE	0.1457
MD00G1141800	0	0	0	0	0	0	0	0	0	0	0	0	0	0	0	0	0	0	0	0	0	0	1	0	NA	NA	NA	NA	NA	NA	NA	NA	NA	1	0	NA	NA	NA	NA	NA	NA	NA	NA	NA
MD00G1142200	72	90	73	0	0	0	0	0	0	66	71	62	0	0	0	0	0	0	16.76	66	0	0	0.004	-7.831	-7.112	1.14122e-12	9.03719e-12	0	0.1019	0.0595	0.0595	TRUE	0.0937	0.005	-7.645	-6.941	3.88661e-12	3.4182e-11	0	0.1019	0.0595	0.0595	TRUE	0.0937
MD00G1142300	0	0	0	0	0	0	25	25	23	0	0	0	0	0	0	26	23	27	14.36	0	0	25	1	0	0	1	1	0	0.1175	0.0629	0.0629	TRUE	0.0575	96.248	6.589	5.981	2.22024e-09	1.43787e-08	0	0.1175	0.0629	0.0629	TRUE	0.0575
MD00G1142400	82	102	93	110	145	111	93	103	86	75	80	79	102	118	107	95	94	102	71.66	78	109	97	1.346	0.428	2.82	0.00480949	0.0100249	0	0.0304	0.0112	0.0112	TRUE	0.2841	1.196	0.258	1.787	0.0739631	0.122636	0	0.0304	0.0112	0.0112	TRUE	0.2841
MD00G1142500	36	33	54	35	30	29	34	35	37	33	26	46	32	24	28	35	32	44	36.78	35	28	37	0.855	-0.227	-1.036	0.300421	0.383956	0.024	0.0511	0.0362	0.0362	TRUE	0.2406	1.033	0.047	0.252	0.801191	0.853388	0.024	0.0511	0.0362	0.0362	TRUE	0.2406
MD00G1142600	440	528	432	580	665	589	331	342	274	405	414	366	537	539	566	338	314	326	547.44	395	547	326	1.359	0.442	3.81	0.000138954	0.000389302	0.0081	0.0115	0.0091	0.0091	TRUE	0.1681	0.841	-0.25	-2.186	0.0288494	0.0543138	0.0081	0.0115	0.0091	0.0091	TRUE	0.1681
MD00G1142700	0	0	0	3	4	5	0	2	0	0	0	0	3	3	5	0	2	0	1.16	0	4	1	4.972	2.314	2.615	0.00892463	0.0175472	0	1.3553	1.0363	1.0363	TRUE	0.4861	1.315	0.396	1.046	0.295401	0.391704	0	1.3553	1.0363	1.0363	TRUE	0.4861
MD00G1142800	0	0	0	0	0	0	0	0	0	0	0	0	0	0	0	0	0	0	0	0	0	0	1	0	NA	NA	NA	NA	NA	NA	NA	NA	NA	1	0	NA	NA	NA	NA	NA	NA	NA	NA	NA
MD00G1143000	1525	1756	1495	324	398	327	184	205	144	1404	1377	1267	300	323	314	188	188	171	605.96	1349	312	182	0.236	-2.081	-11.405	3.95976e-30	1.05925e-28	0.0295	0.0112	0.0229	0.0229	TRUE	0.1537	0.137	-2.869	-15.169	5.65954e-52	4.20407e-50	0.0295	0.0112	0.0229	0.0229	TRUE	0.1537
MD00G1143300	415	521	469	412	482	338	348	447	385	382	409	397	382	391	325	355	410	458	379.48	396	366	408	0.929	-0.106	-0.912	0.361964	0.448963	0.0071	0.0127	0.0089	0.0089	TRUE	0.0716	1.024	0.035	0.311	0.755823	0.817443	0.0071	0.0127	0.0089	0.0089	TRUE	0.0716
MD00G1143400	3	1	1	4	2	2	0	3	1	3	1	1	4	2	2	0	3	1	2.56	2	3	1	1.172	0.229	0.715	0.474394	0.561164	0	0.6194	0.3041	0.3041	TRUE	0.3258	0.988	-0.018	-0.066	0.947521	0.966282	0	0.6194	0.3041	0.3041	TRUE	0.3258
MD00G1143500	361	419	378	94	133	105	119	145	131	332	329	320	87	108	101	122	133	156	658.24	327	99	137	0.306	-1.71	-14.01	1.34842e-44	7.14239e-43	0	0.011	0.0051	0.0051	TRUE	0.068	0.421	-1.248	-10.631	2.14372e-26	5.39037e-25	0	0.011	0.0051	0.0051	TRUE	0.068
MD00G1143600	13	13	16	3	4	5	8	15	2	12	10	14	3	3	5	8	14	2	34.42	12	4	8	0.395	-1.339	-3.283	0.00102778	0.00245301	0	0.0541	0.0393	0.0393	TRUE	0.5914	0.838	-0.255	-1.123	0.261353	0.354215	0	0.0541	0.0393	0.0393	TRUE	0.5914
MD00G1143700	851	909	1075	823	1078	736	522	742	565	783	713	911	763	874	707	533	680	672	567.24	802	781	628	0.976	-0.035	-0.274	0.784282	0.836282	0.013	0.0114	0.0125	0.0125	TRUE	0.1039	0.805	-0.312	-2.549	0.0107919	0.0228005	0.013	0.0114	0.0125	0.0125	TRUE	0.1039
MD00G1143800	1	0	0	1	0	2	1	0	1	1	0	0	1	0	2	1	0	1	0.5	0	1	1	1.2	0.263	0.681	0.495764	NA	0	3.1471	2.5954	2.5954	TRUE	0.0953	1.131	0.177	0.507	0.612072	NA	0	3.1471	2.5954	2.5954	TRUE	0.0953
MD00G1144100	0	0	0	2	0	0	0	0	0	0	0	0	2	0	0	0	0	0	0.15	0	1	0	1.13	0.177	0.453	0.650218	NA	0	10.1318	12	12	TRUE	0.4871	1	0	0	1	NA	0	10.1318	12	12	TRUE	0.4871
MD00G1144200	0	0	0	0	0	0	0	0	0	0	0	0	0	0	0	0	0	0	0	0	0	0	1	0	NA	NA	NA	NA	NA	NA	NA	NA	NA	1	0	NA	NA	NA	NA	NA	NA	NA	NA	NA
MD00G1144300	31	24	24	9	18	11	11	11	11	29	19	20	8	15	11	11	10	13	18.01	23	11	11	0.601	-0.735	-2.629	0.00856038	0.0169054	0	0.0954	0.0443	0.0443	TRUE	0.166	0.624	-0.681	-2.525	0.0115667	0.0242479	0	0.0954	0.0443	0.0443	TRUE	0.166
MD00G1144400	35	50	41	101	122	109	74	77	50	32	39	35	94	99	105	76	71	59	64.69	35	99	69	2.692	1.429	7.344	2.07089e-13	1.76229e-12	0	0.0328	0.0128	0.0128	TRUE	0.0524	1.819	0.863	4.511	6.45304e-06	2.57197e-05	0	0.0328	0.0128	0.0128	TRUE	0.0524
MD00G1144500	55	62	58	179	244	163	128	140	88	51	49	49	166	198	157	131	128	105	121.67	50	174	121	3.437	1.781	10.082	6.64693e-24	1.27699e-22	0	0.0215	0.0122	0.0122	TRUE	0.0896	2.387	1.255	6.974	3.07072e-12	2.72896e-11	0	0.0215	0.0122	0.0122	TRUE	0.0896
MD00G1144600	77	110	109	71	87	86	579	627	419	71	86	92	66	71	83	591	575	498	205.82	83	73	555	0.887	-0.173	-1.168	0.24264	0.320364	0	0.0162	0.0088	0.0088	TRUE	0.076	6.609	2.725	19.048	6.87672e-81	1.19271e-78	0	0.0162	0.0088	0.0088	TRUE	0.076
MD00G1144700	1391	1602	1419	1520	1977	1526	1623	1809	1351	1280	1257	1203	1409	1603	1466	1657	1658	1606	1303.49	1247	1493	1640	1.193	0.255	3.622	0.000292794	0.000774909	0.0013	0.0098	0.0031	0.0031	TRUE	0.0259	1.304	0.383	5.496	3.88217e-08	2.1412e-07	0.0013	0.0098	0.0031	0.0031	TRUE	0.0259
MD00G1144800	313	392	279	198	146	155	283	299	309	288	308	236	183	118	149	289	274	367	411.57	277	150	310	0.575	-0.798	-4.321	1.55534e-05	5.08761e-05	0.0337	0.0124	0.0258	0.0258	TRUE	0.0264	1.089	0.123	0.79	0.429584	0.528965	0.0337	0.0124	0.0258	0.0258	TRUE	0.0264
MD00G1145000	383	451	375	422	488	385	304	374	268	353	354	318	391	396	370	310	343	319	340.66	342	386	324	1.119	0.163	1.328	0.184157	0.25287	0.0087	0.0132	0.0102	0.0102	TRUE	0.1539	0.956	-0.065	-0.554	0.579905	0.668479	0.0087	0.0132	0.0102	0.0102	TRUE	0.1539
MD00G1145100	7	5	6	2	0	4	1	5	0	6	4	5	2	0	4	1	5	0	2.56	5	2	2	0.708	-0.498	-1.34	0.180194	0.248132	0.4085	0.6185	0.5466	0.5466	TRUE	0.3296	0.753	-0.41	-1.246	0.212694	0.298992	0.4085	0.6185	0.5466	0.5466	TRUE	0.3296
MD00G1145200	2	0	0	0	1	0	0	0	0	2	0	0	0	1	0	0	0	0	0.22	1	0	0	0.946	-0.081	-0.211	0.832745	NA	0	7.0834	12	12	TRUE	0.4871	0.907	-0.14	-0.384	0.700923	NA	0	7.0834	12	12	TRUE	0.4871
MD00G1145300	0	0	0	0	0	0	0	1	2	0	0	0	0	0	0	0	1	2	0.35	0	0	1	1	0	0	1	NA	0	4.4737	6.7632	6.7632	TRUE	0.0208	1.256	0.328	0.829	0.407376	NA	0	4.4737	6.7632	6.7632	TRUE	0.0208
MD00G1145400	100	106	107	0	0	0	0	0	0	92	83	91	0	0	0	0	0	0	38	89	0	0	0.003	-8.257	-7.598	3.00582e-14	2.77787e-13	0	0.0498	0.0217	0.0217	TRUE	0.0387	0.004	-8.072	-7.424	1.13844e-13	1.17369e-12	0	0.0498	0.0217	0.0217	TRUE	0.0387
MD00G1145500	0	0	0	0	0	0	375	383	343	0	0	0	0	0	0	383	351	408	95.25	0	0	381	1	0	0	1	1	0	0.025	0.0163	0.0163	TRUE	0.2362	1331.58	10.379	9.467	2.8826e-21	5.3452e-20	0	0.025	0.0163	0.0163	TRUE	0.2362
MD00G1145600	558	800	545	599	678	573	413	386	277	514	628	462	555	550	550	422	354	329	453.96	535	552	368	1.029	0.041	0.286	0.774538	0.828267	0.0189	0.0121	0.0167	0.0167	TRUE	0.2355	0.722	-0.47	-3.316	0.00091432	0.00247316	0.0189	0.0121	0.0167	0.0167	TRUE	0.2355
MD00G1145700	330	361	352	443	557	476	431	509	423	304	283	298	411	452	457	440	467	503	401.58	295	440	470	1.469	0.555	5.638	1.72441e-08	8.53961e-08	0.0017	0.0125	0.0051	0.0051	TRUE	0.0416	1.561	0.642	6.511	7.4412e-11	5.72365e-10	0.0017	0.0125	0.0051	0.0051	TRUE	0.0416
MD00G1146200	24	29	26	22	28	15	16	20	14	22	23	22	20	23	14	16	18	17	15.13	22	19	17	0.907	-0.141	-0.604	0.545853	0.628957	0	0.112	0.0449	0.0449	TRUE	0.1241	0.858	-0.22	-1.05	0.293913	0.39012	0	0.112	0.0449	0.0449	TRUE	0.1241
MD00G1146300	0	0	0	0	1	0	0	1	0	0	0	0	0	1	0	0	1	0	0.14	0	0	0	1.065	0.09	0.236	0.813239	NA	0	10.8682	12	12	TRUE	0.1698	1.074	0.103	0.283	0.776832	NA	0	10.8682	12	12	TRUE	0.1698
MD00G1146600	0	0	0	0	0	0	0	0	0	0	0	0	0	0	0	0	0	0	0	0	0	0	1	0	NA	NA	NA	NA	NA	NA	NA	NA	NA	1	0	NA	NA	NA	NA	NA	NA	NA	NA	NA
MD00G1146800	928	1081	1003	849	921	773	992	1091	974	854	848	850	787	747	743	1013	1000	1158	1411.16	851	759	1057	0.895	-0.161	-2.167	0.0302282	0.0521592	0.001	0.0097	0.0031	0.0031	TRUE	0.0403	1.23	0.298	4.127	3.67832e-05	0.000129413	0.001	0.0097	0.0031	0.0031	TRUE	0.0403
MD00G1146900	3	3	4	4	3	0	3	5	0	3	2	3	4	2	0	3	5	0	1.86	3	2	3	0.92	-0.12	-0.38	0.704065	0.76851	0	0.8503	0.6755	0.6755	TRUE	0.1374	0.983	-0.025	-0.092	0.926433	0.950068	0	0.8503	0.6755	0.6755	TRUE	0.1374
MD00G1147000	858	1008	991	1137	1316	1074	840	893	750	790	791	840	1054	1067	1032	858	819	892	722.29	807	1051	856	1.295	0.372	5.115	3.14405e-07	1.31481e-06	0	0.0108	0.0031	0.0031	TRUE	0.0358	1.057	0.08	1.099	0.27172	0.365555	0	0.0108	0.0031	0.0031	TRUE	0.0358
MD00G1147100	1	1	3	11	15	13	8	10	5	1	1	3	10	12	12	8	9	6	16.85	2	11	8	6.452	2.69	4.17	3.05064e-05	9.52283e-05	0	0.1014	0.0448	0.0448	TRUE	0.1875	3.747	1.906	3.283	0.00102836	0.00274953	0	0.1014	0.0448	0.0448	TRUE	0.1875
MD00G1147200	1	0	1	5	5	6	4	6	9	1	0	1	5	4	6	4	6	11	6.99	1	5	7	3.522	1.816	2.665	0.0076985	0.0153493	0	0.2322	0.1209	0.1209	TRUE	0.1985	5.749	2.523	3.095	0.0019703	0.00496034	0	0.2322	0.1209	0.1209	TRUE	0.1985
MD00G1147300	0	0	0	1	0	0	0	0	0	0	0	0	1	0	0	0	0	0	0.08	0	0	0	1.065	0.09	0.236	0.813237	NA	0	20.255	12	12	TRUE	0.2275	1	0	0	1	NA	0	20.255	12	12	TRUE	0.2275
MD00G1147600	36	33	37	14	6	7	7	3	14	33	26	31	13	5	7	7	3	17	13.25	30	8	9	0.35	-1.513	-3.491	0.000481656	0.00122375	0.161	0.1266	0.1415	0.1415	TRUE	0.5096	0.373	-1.421	-3.311	0.000929957	0.00251	0.161	0.1266	0.1415	0.1415	TRUE	0.5096
MD00G1147700	37	44	53	6	10	11	10	5	7	34	35	45	6	8	11	10	5	8	14.63	38	8	8	0.238	-2.069	-5.211	1.88142e-07	8.09297e-07	0	0.1155	0.0652	0.0652	TRUE	0.2251	0.224	-2.156	-5.169	2.34736e-07	1.16508e-06	0	0.1155	0.0652	0.0652	TRUE	0.2251
MD00G1147800	0	0	0	1	3	3	0	0	1	0	0	0	1	2	3	0	0	1	0.62	0	2	0	1.854	0.891	1.632	0.102713	NA	0	2.5338	2.5623	2.5623	TRUE	0.2804	1.128	0.174	0.497	0.619514	NA	0	2.5338	2.5623	2.5623	TRUE	0.2804
MD00G1148000	385	429	351	650	694	616	551	638	501	354	337	297	602	563	592	563	585	596	481.11	329	586	581	1.749	0.807	8.155	3.48358e-16	3.79277e-15	0.0024	0.0119	0.0054	0.0054	TRUE	0.0638	1.735	0.795	7.977	1.49879e-15	1.81939e-14	0.0024	0.0119	0.0054	0.0054	TRUE	0.0638
MD00G1148100	1729	2202	2055	2064	2234	1927	1684	1901	1603	1592	1727	1742	1913	1812	1851	1720	1743	1905	1893.22	1687	1859	1789	1.097	0.134	1.434	0.151632	0.2138	0.0052	0.0094	0.0063	0.0063	TRUE	0.1077	1.056	0.078	0.863	0.388115	0.487941	0.0052	0.0094	0.0063	0.0063	TRUE	0.1077
MD00G1148200	77	80	72	38	36	26	91	122	76	71	63	61	35	29	25	93	112	90	55.42	65	30	98	0.494	-1.018	-4.775	1.79464e-06	6.74957e-06	0	0.0368	0.018	0.018	TRUE	0.1375	1.419	0.505	2.983	0.00285189	0.00692518	0	0.0368	0.018	0.018	TRUE	0.1375
MD00G1148300	194	235	213	71	83	82	114	109	125	179	184	181	66	67	79	116	100	149	119.81	181	71	122	0.4	-1.323	-8.089	6.01939e-16	6.4224e-15	0	0.0217	0.0117	0.0117	TRUE	0.178	0.698	-0.519	-3.67	0.00024301	0.000737155	0	0.0217	0.0117	0.0117	TRUE	0.178
MD00G1148400	1	1	2	1	0	1	0	1	1	1	1	2	1	0	1	0	1	1	0.62	1	1	1	0.888	-0.171	-0.489	0.625177	NA	0	2.5466	1.2709	1.2709	TRUE	0.1529	0.919	-0.122	-0.389	0.697363	NA	0	2.5466	1.2709	1.2709	TRUE	0.1529
MD00G1148500	105	107	94	86	95	69	98	90	99	97	84	80	80	77	66	100	83	118	74.73	87	74	100	0.878	-0.188	-1.152	0.249461	0.328081	0	0.0295	0.015	0.015	TRUE	0.0554	1.117	0.159	1.068	0.285353	0.380818	0	0.0295	0.015	0.015	TRUE	0.0554
MD00G1148600	80	134	95	84	168	175	32	83	61	74	105	81	78	136	168	33	76	73	111.25	87	127	61	1.299	0.377	1.518	0.129073	0.186079	0.1384	0.0227	0.0891	0.0891	TRUE	0.084	0.811	-0.303	-1.373	0.169842	0.247883	0.1384	0.0227	0.0891	0.0891	TRUE	0.084
MD00G1148700	1	1	0	0	0	0	0	0	0	1	1	0	0	0	0	0	0	0	0.14	1	0	0	0.896	-0.158	-0.408	0.683146	NA	0	11.0134	12	12	TRUE	0.1224	0.913	-0.131	-0.361	0.71844	NA	0	11.0134	12	12	TRUE	0.1224
MD00G1148800	1	0	0	2	2	3	6	3	10	1	0	0	2	2	3	6	3	12	30.78	0	2	7	2.262	1.177	2.103	0.035425	0.0601183	0	0.0594	0.0457	0.0457	TRUE	0.2575	11.816	3.563	3.558	0.000374266	0.00109565	0	0.0594	0.0457	0.0457	TRUE	0.2575
MD00G1148900	1	1	0	3	10	8	8	5	4	1	1	0	3	8	8	8	5	5	6.12	1	6	6	4.613	2.206	2.851	0.00436299	0.009167	0	0.2642	0.2392	0.2392	TRUE	0.0446	4.132	2.047	2.755	0.00586972	0.0132087	0	0.2642	0.2392	0.2392	TRUE	0.0446
MD00G1149000	4	5	3	5	9	9	4	7	3	4	4	3	5	7	9	4	6	4	4.04	4	7	5	1.391	0.476	1.457	0.145048	0.205691	0	0.396	0.1612	0.1612	TRUE	0.1128	1.124	0.168	0.663	0.507625	0.603592	0	0.396	0.1612	0.1612	TRUE	0.1128
MD00G1149100	0	0	0	0	0	0	0	0	0	0	0	0	0	0	0	0	0	0	0	0	0	0	1	0	NA	NA	NA	NA	NA	NA	NA	NA	NA	1	0	NA	NA	NA	NA	NA	NA	NA	NA	NA
MD00G1149200	436	508	560	497	683	570	453	579	499	401	399	475	461	554	548	463	531	593	415.1	425	521	529	1.182	0.241	1.309	0.190448	0.26012	0.05	0.0124	0.0344	0.0344	TRUE	1.0047	1.178	0.237	1.404	0.160322	0.23618	0.05	0.0124	0.0344	0.0344	TRUE	1.0047
MD00G1149300	80	103	86	50	65	47	144	200	117	74	81	73	46	53	45	147	183	139	113.8	76	48	156	0.668	-0.581	-3.481	0.000499167	0.00126513	0	0.0224	0.0105	0.0105	TRUE	0.1243	2.008	1.006	6.401	1.5472e-10	1.14793e-09	0	0.0224	0.0105	0.0105	TRUE	0.1243
MD00G1149400	0	0	0	0	0	0	0	0	0	0	0	0	0	0	0	0	0	0	0	0	0	0	1	0	NA	NA	NA	NA	NA	NA	NA	NA	NA	1	0	NA	NA	NA	NA	NA	NA	NA	NA	NA
MD00G1149500	363	401	407	367	482	379	379	479	373	334	315	345	340	391	364	387	439	443	409.07	331	365	423	1.099	0.136	1.447	0.147772	0.20914	0	0.0124	0.0045	0.0045	TRUE	0.0324	1.258	0.331	3.589	0.000331964	0.000982222	0	0.0124	0.0045	0.0045	TRUE	0.0324
MD00G1149800	0	1	0	0	0	0	1	0	0	0	1	0	0	0	0	1	0	0	0.26	0	0	0	0.939	-0.09	-0.234	0.814646	NA	0	6.105	8.208	8.208	TRUE	0.243	1.019	0.028	0.076	0.939103	NA	0	6.105	8.208	8.208	TRUE	0.243
MD00G1149900	256	327	285	518	591	508	456	508	362	236	257	242	480	479	488	466	466	430	397.84	245	482	454	1.947	0.961	10.662	1.52632e-26	3.45997e-25	0	0.0126	0.0034	0.0034	TRUE	0.0112	1.834	0.875	9.563	1.14278e-21	2.17198e-20	0	0.0126	0.0034	0.0034	TRUE	0.0112
MD00G1150000	434	477	442	349	406	353	391	515	391	399	374	375	323	329	339	399	472	465	399.34	383	330	445	0.87	-0.201	-2.025	0.0428511	0.0710343	0.0021	0.0125	0.0053	0.0053	TRUE	0.048	1.151	0.203	2.133	0.0329186	0.0609653	0.0021	0.0125	0.0053	0.0053	TRUE	0.048
MD00G1150100	0	0	0	0	0	0	0	0	0	0	0	0	0	0	0	0	0	0	0	0	0	0	1	0	NA	NA	NA	NA	NA	NA	NA	NA	NA	1	0	NA	NA	NA	NA	NA	NA	NA	NA	NA
MD00G1150200	0	1	0	0	0	0	0	1	0	0	1	0	0	0	0	0	1	0	0.43	0	0	0	0.922	-0.118	-0.311	0.755543	NA	0	3.6495	3.7879	3.7879	TRUE	0.0499	1.025	0.035	0.101	0.919187	NA	0	3.6495	3.7879	3.7879	TRUE	0.0499
MD00G1150300	0	1	0	1	1	0	2	0	1	0	1	0	1	1	0	2	0	1	0.8	0	1	1	1.123	0.167	0.467	0.64075	0.713682	0	1.9638	1.2424	1.2424	TRUE	0.1181	1.26	0.333	0.923	0.355869	0.455572	0	1.9638	1.2424	1.2424	TRUE	0.1181
MD00G1150400	3	5	3	1	1	1	1	3	4	3	4	3	1	1	1	1	3	5	2.07	3	1	3	0.65	-0.622	-1.538	0.124062	0.179773	0	0.7649	0.3342	0.3342	TRUE	0.0734	0.973	-0.04	-0.154	0.877528	0.913336	0	0.7649	0.3342	0.3342	TRUE	0.0734
MD00G1150500	99	112	123	560	726	489	400	374	313	91	88	104	519	589	470	408	343	372	290.93	94	526	374	5.508	2.462	15.149	7.64436e-52	5.39883e-50	0.0139	0.014	0.0139	0.0139	TRUE	0.2034	3.9	1.963	11.981	4.45579e-33	1.56604e-31	0.0139	0.014	0.0139	0.0139	TRUE	0.2034
MD00G1150600	26	20	30	58	46	47	48	48	24	24	16	25	54	37	45	49	44	29	33.66	22	45	41	1.866	0.9	3.587	0.000334896	0.000875756	0	0.0551	0.0345	0.0345	TRUE	0.1374	1.649	0.721	3.022	0.00251248	0.00618458	0	0.0551	0.0345	0.0345	TRUE	0.1374
MD00G1150700	0	2	1	58	50	45	9	16	14	0	2	1	54	41	43	9	15	17	16.52	1	46	14	42.735	5.417	6.481	9.11226e-11	5.86462e-10	0	0.1032	0.058	0.058	TRUE	0.1734	12.186	3.607	4.381	1.18031e-05	4.50685e-05	0	0.1032	0.058	0.058	TRUE	0.1734
MD00G1150800	32	44	35	6	17	6	17	12	11	29	35	30	6	14	6	17	11	13	17.31	31	9	14	0.311	-1.685	-4.63	3.66412e-06	1.31532e-05	0	0.0989	0.0515	0.0515	TRUE	0.5959	0.528	-0.921	-3.132	0.00173664	0.00441953	0	0.0989	0.0515	0.0515	TRUE	0.5959
MD00G1150900	6	21	12	0	0	0	0	0	0	6	16	10	0	0	0	0	0	0	3.53	11	0	0	0.03	-5.07	-4.2	2.66545e-05	8.38987e-05	0.4287	0.4515	0.4447	0.4447	TRUE	0.0426	0.035	-4.848	-4.055	5.0059e-05	0.000171983	0.4287	0.4515	0.4447	0.4447	TRUE	0.0426
MD00G1151000	18	26	11	12	18	11	8	9	12	17	20	9	11	15	11	8	8	14	14.18	15	12	10	0.868	-0.205	-0.796	0.426189	0.514157	0	0.1189	0.0729	0.0729	TRUE	0.1199	0.799	-0.324	-1.35	0.176924	0.256582	0	0.1189	0.0729	0.0729	TRUE	0.1199
MD00G1151100	74	92	94	7	11	7	12	7	6	68	72	80	6	9	7	12	6	7	34.8	73	7	8	0.105	-3.246	-9.053	1.39065e-19	1.98231e-18	0	0.0535	0.0299	0.0299	TRUE	0.2281	0.122	-3.034	-8.488	2.11089e-17	2.9715e-16	0	0.0535	0.0299	0.0299	TRUE	0.2281
MD00G1151200	39	39	37	4	2	2	1	1	4	36	31	31	4	2	2	1	1	5	12.82	33	3	2	0.083	-3.59	-5.75	8.91629e-09	4.56527e-08	0.0323	0.1306	0.1092	0.1092	TRUE	0.5237	0.074	-3.755	-5.537	3.08566e-08	1.72665e-07	0.0323	0.1306	0.1092	0.1092	TRUE	0.5237
MD00G1151300	2	11	13	8	5	1	5	5	7	2	9	11	7	4	1	5	5	8	5.99	7	4	6	0.795	-0.33	-1.061	0.288834	0.371516	0.21	0.2698	0.2396	0.2396	TRUE	0.1951	0.936	-0.095	-0.388	0.697743	0.769811	0.21	0.2698	0.2396	0.2396	TRUE	0.1951
MD00G1151400	5	8	4	3	2	2	3	3	8	5	6	3	3	2	2	3	3	10	5.66	5	2	5	0.703	-0.508	-1.469	0.141954	0.201933	0	0.2851	0.1707	0.1707	TRUE	0.4913	1.011	0.016	0.067	0.946513	0.965643	0	0.2851	0.1707	0.1707	TRUE	0.4913
MD00G1151500	53	55	58	3	2	3	4	4	3	49	43	49	3	2	3	4	4	4	25.64	47	3	4	0.055	-4.18	-7.678	1.61694e-14	1.53151e-13	0	0.0696	0.0294	0.0294	TRUE	0.0615	0.086	-3.541	-7.38	1.58531e-13	1.60729e-12	0	0.0696	0.0294	0.0294	TRUE	0.0615
MD00G1151600	3	3	5	2	3	1	0	1	0	3	2	4	2	2	1	0	1	0	2.37	3	2	0	0.831	-0.268	-0.836	0.403125	0.491308	0	0.6683	0.2887	0.2887	TRUE	0.1613	0.41	-1.285	-2.181	0.0291474	0.0548084	0	0.6683	0.2887	0.2887	TRUE	0.1613
MD00G1151700	2	2	6	1	0	1	0	2	2	2	2	5	1	0	1	0	2	2	3.02	3	1	1	0.574	-0.8	-1.741	0.0816169	0.124759	0	0.5257	0.2906	0.2906	TRUE	0.2313	0.818	-0.29	-0.973	0.330424	0.428768	0	0.5257	0.2906	0.2906	TRUE	0.2313
MD00G1151800	6	4	2	5	2	4	0	0	0	6	3	2	5	2	4	0	0	0	2.07	4	4	0	0.992	-0.012	-0.041	0.967571	0.982283	0	0.7648	0.4376	0.4376	TRUE	0.0972	0.174	-2.522	-2.832	0.00462409	0.0106776	0	0.7648	0.4376	0.4376	TRUE	0.0972
MD00G1151900	103	123	134	153	154	127	115	125	73	95	96	114	142	125	122	117	115	87	111.07	102	130	106	1.242	0.313	2.14	0.0323546	0.0554383	0	0.0227	0.0116	0.0116	TRUE	0.1141	1.042	0.059	0.426	0.670009	0.746456	0	0.0227	0.0116	0.0116	TRUE	0.1141
MD00G1152000	820	868	971	788	1085	784	716	869	708	755	681	823	730	880	753	731	797	842	752	753	788	790	1.038	0.054	0.299	0.764559	0.820089	0.0477	0.0107	0.0336	0.0336	TRUE	0.3381	1.036	0.051	0.314	0.753621	0.815772	0.0477	0.0107	0.0336	0.0336	TRUE	0.3381
MD00G1152100	259	291	281	408	467	379	343	400	239	238	228	238	378	379	364	350	367	284	354.4	235	374	334	1.561	0.642	6.016	1.78603e-09	9.97621e-09	0.0022	0.013	0.0059	0.0059	TRUE	0.0902	1.392	0.477	4.511	6.4618e-06	2.57492e-05	0.0022	0.013	0.0059	0.0059	TRUE	0.0902
MD00G1152200	2	5	2	1	1	3	2	5	2	2	4	2	1	1	3	2	5	2	2.55	3	2	3	0.851	-0.233	-0.733	0.463725	0.550623	0	0.6227	0.2696	0.2696	TRUE	0.2098	1.056	0.078	0.302	0.762474	0.822957	0	0.6227	0.2696	0.2696	TRUE	0.2098
MD00G1152300	6	4	4	3	6	4	3	6	5	6	3	3	3	5	4	3	6	6	4.49	4	4	5	0.988	-0.018	-0.062	0.950356	0.970439	0	0.3567	0.1455	0.1455	TRUE	0.1055	1.068	0.095	0.39	0.696208	0.768732	0	0.3567	0.1455	0.1455	TRUE	0.1055
MD00G1152400	613	706	636	487	717	529	737	811	563	564	554	539	451	582	508	753	743	669	499.03	552	514	722	0.936	-0.095	-0.764	0.44515	0.532671	0.0115	0.0118	0.0116	0.0116	TRUE	0.2527	1.27	0.345	2.867	0.00414905	0.00969899	0.0115	0.0118	0.0116	0.0116	TRUE	0.2527
MD00G1152500	210	189	208	171	191	197	211	225	187	193	148	176	158	155	189	215	206	222	165.03	172	167	214	0.974	-0.038	-0.281	0.778558	0.831565	0.0065	0.0181	0.0112	0.0112	TRUE	0.0991	1.209	0.274	2.12	0.0340481	0.0627516	0.0065	0.0181	0.0112	0.0112	TRUE	0.0991
MD00G1152600	1404	1834	1339	1148	1255	1077	1550	1543	1235	1292	1439	1135	1064	1018	1035	1583	1415	1468	1790.7	1289	1039	1489	0.816	-0.293	-2.619	0.00880807	0.0173381	0.0087	0.0095	0.0094	0.0094	TRUE	0.0407	1.139	0.188	1.754	0.0794386	0.130416	0.0087	0.0095	0.0094	0.0094	TRUE	0.0407
MD00G1152700	253	267	237	115	142	120	110	122	82	233	209	201	107	115	115	112	112	97	163.01	214	112	107	0.538	-0.894	-7.096	1.28089e-12	1.00897e-11	0	0.0182	0.0064	0.0064	TRUE	0.0304	0.514	-0.96	-7.336	2.20088e-13	2.2068e-12	0	0.0182	0.0064	0.0064	TRUE	0.0304
MD00G1152800	66	67	62	76	76	56	71	85	49	61	53	53	70	62	54	73	78	58	47.07	56	62	70	1.1	0.137	0.752	0.452071	0.539465	0	0.0418	0.0209	0.0209	TRUE	0.7267	1.196	0.258	1.528	0.126592	0.193515	0	0.0418	0.0209	0.0209	TRUE	0.7267
MD00G1152900	0	0	0	0	0	0	0	0	0	0	0	0	0	0	0	0	0	0	0	0	0	0	1	0	NA	NA	NA	NA	NA	NA	NA	NA	NA	1	0	NA	NA	NA	NA	NA	NA	NA	NA	NA
MD00G1153200	0	0	0	0	0	0	0	0	0	0	0	0	0	0	0	0	0	0	0	0	0	0	1	0	NA	NA	NA	NA	NA	NA	NA	NA	NA	1	0	NA	NA	NA	NA	NA	NA	NA	NA	NA
MD00G1153300	0	0	0	0	0	0	0	0	0	0	0	0	0	0	0	0	0	0	0	0	0	0	1	0	NA	NA	NA	NA	NA	NA	NA	NA	NA	1	0	NA	NA	NA	NA	NA	NA	NA	NA	NA
MD00G1153400	1	1	1	0	0	0	0	0	0	1	1	1	0	0	0	0	0	0	0.21	1	0	0	0.843	-0.246	-0.611	0.541058	NA	0	7.3595	9.296	9.296	TRUE	0.0449	0.865	-0.21	-0.557	0.577211	NA	0	7.3595	9.296	9.296	TRUE	0.0449
MD00G1153500	0	0	0	0	0	0	0	0	0	0	0	0	0	0	0	0	0	0	0	0	0	0	1	0	NA	NA	NA	NA	NA	NA	NA	NA	NA	1	0	NA	NA	NA	NA	NA	NA	NA	NA	NA
MD00G1153600	0	0	0	0	0	0	0	0	0	0	0	0	0	0	0	0	0	0	0	0	0	0	1	0	NA	NA	NA	NA	NA	NA	NA	NA	NA	1	0	NA	NA	NA	NA	NA	NA	NA	NA	NA
MD00G1153700	12	15	8	23	20	29	30	23	21	11	12	7	21	16	28	31	21	25	21.03	10	22	26	1.754	0.81	2.623	0.00872512	0.0171957	0.0614	0.083	0.0712	0.0712	TRUE	0.1446	2.088	1.062	3.17	0.00152484	0.00392687	0.0614	0.083	0.0712	0.0712	TRUE	0.1446
MD00G1153800	0	0	0	0	1	0	0	0	0	0	0	0	0	1	0	0	0	0	0.07	0	0	0	1.065	0.09	0.236	0.813237	NA	0	23.1429	12	12	TRUE	0.1698	1	0	0	1	NA	0	23.1429	12	12	TRUE	0.1698
MD00G1153900	0	0	0	1	0	0	0	0	0	0	0	0	1	0	0	0	0	0	0.08	0	0	0	1.065	0.09	0.236	0.813237	NA	0	20.255	12	12	TRUE	0.2275	1	0	0	1	NA	0	20.255	12	12	TRUE	0.2275
MD00G1154000	1	0	1	0	0	0	0	0	0	1	0	1	0	0	0	0	0	0	0.15	1	0	0	0.893	-0.163	-0.419	0.674941	NA	0	10.621	12	12	TRUE	0.1385	0.91	-0.136	-0.372	0.710112	NA	0	10.621	12	12	TRUE	0.1385
MD00G1154100	25	30	28	11	11	10	3	11	3	23	24	24	10	9	10	3	10	4	15.4	24	10	6	0.492	-1.023	-3.245	0.00117653	0.00277378	0	0.1101	0.0496	0.0496	TRUE	0.634	0.287	-1.803	-4.325	1.52571e-05	5.72371e-05	0	0.1101	0.0496	0.0496	TRUE	0.634
MD00G1154200	238	307	245	279	327	288	213	215	168	219	241	208	259	265	277	218	197	200	231.31	223	267	205	1.171	0.228	1.442	0.149375	0.211065	0.0228	0.0154	0.0201	0.0201	TRUE	0.1162	0.935	-0.096	-0.653	0.513469	0.608977	0.0228	0.0154	0.0201	0.0201	TRUE	0.1162
MD00G1154400	3	0	0	39	39	33	34	46	33	3	0	0	36	32	32	35	42	39	23.76	1	33	39	31.439	4.974	6.084	1.17443e-09	6.71489e-09	0	0.0744	0.0317	0.0317	TRUE	0.7233	36.493	5.19	6.345	2.23001e-10	1.6248e-09	0	0.0744	0.0317	0.0317	TRUE	0.7233
MD00G1154500	1	0	0	0	0	0	0	0	0	1	0	0	0	0	0	0	0	0	0.08	0	0	0	0.948	-0.076	-0.2	0.841337	NA	0	20.3917	12	12	TRUE	0.251	0.963	-0.055	-0.153	0.878411	NA	0	20.3917	12	12	TRUE	0.251
MD00G1154600	0	0	0	0	0	0	0	0	0	0	0	0	0	0	0	0	0	0	0	0	0	0	1	0	NA	NA	NA	NA	NA	NA	NA	NA	NA	1	0	NA	NA	NA	NA	NA	NA	NA	NA	NA
MD00G1154700	0	0	0	0	0	0	0	0	0	0	0	0	0	0	0	0	0	0	0	0	0	0	1	0	NA	NA	NA	NA	NA	NA	NA	NA	NA	1	0	NA	NA	NA	NA	NA	NA	NA	NA	NA
MD00G1154800	0	0	0	0	0	0	0	0	0	0	0	0	0	0	0	0	0	0	0	0	0	0	1	0	NA	NA	NA	NA	NA	NA	NA	NA	NA	1	0	NA	NA	NA	NA	NA	NA	NA	NA	NA
MD00G1154900	0	0	3	0	0	0	0	0	0	0	0	3	0	0	0	0	0	0	0.21	1	0	0	0.862	-0.215	-0.545	0.585424	NA	12	7.3882	12	12	TRUE	0.7212	0.88	-0.184	-0.497	0.618896	NA	12	7.3882	12	12	TRUE	0.7212
MD00G1155000	0	0	0	0	0	0	0	0	0	0	0	0	0	0	0	0	0	0	0	0	0	0	1	0	NA	NA	NA	NA	NA	NA	NA	NA	NA	1	0	NA	NA	NA	NA	NA	NA	NA	NA	NA
MD00G1155100	0	0	0	0	0	0	0	0	0	0	0	0	0	0	0	0	0	0	0	0	0	0	1	0	NA	NA	NA	NA	NA	NA	NA	NA	NA	1	0	NA	NA	NA	NA	NA	NA	NA	NA	NA
MD00G1155200	158	183	167	0	0	0	8	16	18	145	144	142	0	0	0	8	15	21	66.45	144	0	15	0.002	-8.927	-8.189	2.62628e-16	2.88635e-15	0.0058	0.0322	0.0216	0.0216	TRUE	0.329	0.103	-3.275	-11.448	2.39649e-30	7.39778e-29	0.0058	0.0322	0.0216	0.0216	TRUE	0.329
MD00G1155300	0	0	0	6	5	9	20	17	19	0	0	0	6	4	9	20	16	23	9.3	0	6	20	23.053	4.527	4.151	3.30669e-05	0.000102678	0	0.1767	0.0852	0.0852	TRUE	0.1653	74.502	6.219	5.602	2.12154e-08	1.21041e-07	0	0.1767	0.0852	0.0852	TRUE	0.1653
MD00G1155400	93	116	107	1	0	0	0	0	0	86	91	91	1	0	0	0	0	0	48.75	89	0	0	0.006	-7.348	-6.768	1.30613e-11	9.23507e-11	0	0.0407	0.0314	0.0314	TRUE	0.2164	0.004	-8.073	-7.397	1.39745e-13	1.42496e-12	0	0.0407	0.0314	0.0314	TRUE	0.2164
MD00G1156000	280	314	320	317	327	242	292	246	246	258	246	271	294	265	232	298	226	292	338.11	258	264	272	1.019	0.027	0.192	0.84787	0.88852	0.0158	0.0132	0.0149	0.0149	TRUE	0.1926	1.042	0.06	0.446	0.655391	0.733892	0.0158	0.0132	0.0149	0.0149	TRUE	0.1926
MD00G1156100	11	8	5	5	17	10	7	6	7	10	6	4	5	14	10	7	6	8	8.29	7	10	7	1.174	0.231	0.825	0.409599	0.49775	0	0.1972	0.1202	0.1202	TRUE	0.0949	1.005	0.008	0.034	0.97293	0.985082	0	0.1972	0.1202	0.1202	TRUE	0.0949
MD00G1156200	601	705	751	399	543	448	357	477	366	553	553	636	370	440	430	365	437	435	430.93	581	413	412	0.741	-0.432	-2.682	0.0073206	0.0146691	0.028	0.0123	0.0223	0.0223	TRUE	0.2366	0.75	-0.415	-2.697	0.00698852	0.015444	0.028	0.0123	0.0223	0.0223	TRUE	0.2366
MD00G1156300	491	549	543	623	806	595	299	328	185	452	431	460	577	654	572	305	301	220	352.48	448	601	275	1.32	0.4	3.484	0.000494558	0.00125414	0.0068	0.0131	0.0091	0.0091	TRUE	0.163	0.636	-0.652	-5.408	6.38514e-08	3.41169e-07	0.0068	0.0131	0.0091	0.0091	TRUE	0.163
MD00G1156400	51	56	63	62	95	66	43	62	26	47	44	53	57	77	63	44	57	31	50.85	48	66	44	1.294	0.372	1.884	0.0596252	0.0948237	0.0172	0.0394	0.0275	0.0275	TRUE	0.1239	0.947	-0.079	-0.443	0.657864	0.736059	0.0172	0.0394	0.0275	0.0275	TRUE	0.1239
MD00G1156500	180	235	211	183	215	190	197	211	147	166	184	179	170	174	183	201	193	175	198.06	176	176	190	0.995	-0.007	-0.041	0.967001	0.982142	0.0206	0.0165	0.0192	0.0192	TRUE	0.0812	1.061	0.086	0.583	0.5599	0.651319	0.0206	0.0165	0.0192	0.0192	TRUE	0.0812
MD00G1156600	0	0	0	0	0	0	0	0	0	0	0	0	0	0	0	0	0	0	0	0	0	0	1	0	NA	NA	NA	NA	NA	NA	NA	NA	NA	1	0	NA	NA	NA	NA	NA	NA	NA	NA	NA
MD00G1156800	56	82	60	33	24	32	39	26	29	52	64	51	31	19	31	40	24	34	34.71	56	27	33	0.534	-0.906	-3.765	0.000166383	0.000459281	0	0.0537	0.0325	0.0325	TRUE	0.2208	0.66	-0.599	-2.783	0.00539355	0.0122466	0	0.0537	0.0325	0.0325	TRUE	0.2208
MD00G1156900	308	333	403	275	324	278	198	224	170	284	261	342	255	263	267	202	205	202	248.46	296	262	203	0.892	-0.164	-1.483	0.138123	0.197386	0	0.0149	0.0069	0.0069	TRUE	0.1076	0.708	-0.498	-4.387	1.14744e-05	4.39165e-05	0	0.0149	0.0069	0.0069	TRUE	0.1076
MD00G1157000	0	1	1	1	0	0	0	1	0	0	1	1	1	0	0	0	1	0	0.62	1	0	0	0.914	-0.13	-0.364	0.7162	NA	0	2.5198	1.606	1.606	TRUE	0.0679	0.941	-0.087	-0.267	0.789188	NA	0	2.5198	1.606	1.606	TRUE	0.0679
MD00G1157200	36	55	19	4	3	3	13	9	4	33	43	16	4	2	3	13	8	5	13.11	31	3	9	0.116	-3.105	-4.749	2.04296e-06	7.61971e-06	0.2636	0.1279	0.1981	0.1981	TRUE	0.124	0.411	-1.283	-2.943	0.00325097	0.00779606	0.2636	0.1279	0.1981	0.1981	TRUE	0.124
MD00G1157300	189	236	194	136	149	137	191	205	150	174	185	164	126	121	132	195	188	178	201.25	174	126	187	0.737	-0.44	-3.61	0.000306632	0.000808422	0	0.0164	0.0063	0.0063	TRUE	0.0498	1.064	0.09	0.802	0.422772	0.522406	0	0.0164	0.0063	0.0063	TRUE	0.0498
MD00G1157400	811	978	934	1142	1308	1192	956	1103	723	747	767	792	1058	1061	1145	976	1011	859	884.01	769	1088	949	1.379	0.464	3.549	0.000385993	0.000998104	0.0157	0.0104	0.0134	0.0134	TRUE	0.3705	1.203	0.267	2.149	0.0316237	0.0588683	0.0157	0.0104	0.0134	0.0134	TRUE	0.3705
MD00G1157500	1	0	0	1	1	2	3	0	0	1	0	0	1	1	2	3	0	0	1.52	0	1	1	1.399	0.484	1.192	0.233324	0.309919	0	1.0383	0.6298	0.6298	TRUE	0.7209	1.288	0.365	1.023	0.306481	0.403484	0	1.0383	0.6298	0.6298	TRUE	0.7209
MD00G1157700	0	0	0	0	0	0	0	0	0	0	0	0	0	0	0	0	0	0	0	0	0	0	1	0	NA	NA	NA	NA	NA	NA	NA	NA	NA	1	0	NA	NA	NA	NA	NA	NA	NA	NA	NA
MD00G1158000	22	24	20	2	3	0	4	4	3	20	19	17	2	2	0	4	4	4	11.22	19	1	4	0.096	-3.382	-4.798	1.60557e-06	6.08574e-06	0	0.148	0.0933	0.0933	TRUE	0.0944	0.254	-1.979	-3.891	9.98752e-05	0.000325299	0	0.148	0.0933	0.0933	TRUE	0.0944
MD00G1158300	62	88	84	12	19	12	18	27	26	57	69	71	11	15	12	18	25	31	29.46	66	13	25	0.205	-2.285	-7.235	4.66508e-13	3.84784e-12	0	0.0617	0.0355	0.0355	TRUE	0.3207	0.403	-1.312	-4.818	1.4495e-06	6.39744e-06	0	0.0617	0.0355	0.0355	TRUE	0.3207
MD00G1158400	14	25	18	2	0	0	9	7	4	13	20	15	2	0	0	9	6	5	6.8	16	1	7	0.056	-4.165	-4.225	2.39394e-05	7.59682e-05	0	0.2385	0.132	0.132	TRUE	0.4696	0.618	-0.694	-2.147	0.0318075	0.0591631	0	0.2385	0.132	0.132	TRUE	0.4696
MD00G1158500	30	34	26	85	86	86	128	160	127	28	27	22	79	70	83	131	147	151	71.06	26	77	143	2.809	1.49	5.441	5.31101e-08	2.46635e-07	0.0498	0.0306	0.0396	0.0396	TRUE	0.6473	5.407	2.435	8.629	6.17749e-18	9.09789e-17	0.0498	0.0306	0.0396	0.0396	TRUE	0.6473
MD00G1158700	10	21	21	8	10	4	9	9	11	9	16	18	7	8	4	9	8	13	9.37	14	6	10	0.597	-0.745	-2.276	0.0228249	0.0406913	0	0.1754	0.0893	0.0893	TRUE	0.231	0.835	-0.26	-1.101	0.270749	0.364603	0	0.1754	0.0893	0.0893	TRUE	0.231
MD00G1158800	7	5	10	2	2	2	8	11	9	6	4	8	2	2	2	8	10	11	5.51	6	2	10	0.499	-1.002	-2.298	0.0215336	0.0386307	0	0.2923	0.125	0.125	TRUE	0.1273	1.204	0.268	1.068	0.285446	0.380929	0	0.2923	0.125	0.125	TRUE	0.1273
MD00G1158900	6	6	11	1	3	3	8	4	4	6	5	9	1	2	3	8	4	5	11.41	7	2	6	0.514	-0.959	-2.339	0.0193233	0.0350607	0	0.1456	0.0746	0.0746	TRUE	0.2069	0.935	-0.098	-0.421	0.673601	0.749428	0	0.1456	0.0746	0.0746	TRUE	0.2069
MD00G1159000	23	38	27	18	21	10	15	17	17	21	30	23	17	17	10	15	16	20	33.25	25	15	17	0.671	-0.576	-2.355	0.018498	0.0337059	0	0.0557	0.0282	0.0282	TRUE	0.1863	0.78	-0.359	-1.697	0.0896582	0.144515	0	0.0557	0.0282	0.0282	TRUE	0.1863
MD00G1159100	12	19	15	11	16	16	12	14	10	11	15	13	10	13	15	12	13	12	9.86	13	13	12	0.995	-0.007	-0.027	0.978601	0.989427	0	0.1671	0.0678	0.0678	TRUE	0.2921	0.978	-0.033	-0.152	0.879463	0.91461	0	0.1671	0.0678	0.0678	TRUE	0.2921
MD00G1159200	10	31	20	7	7	8	12	9	10	9	24	17	6	6	8	12	8	12	11.32	17	7	11	0.518	-0.949	-2.687	0.00721307	0.0144758	0	0.1467	0.093	0.093	TRUE	0.0453	0.791	-0.338	-1.378	0.168301	0.245977	0	0.1467	0.093	0.093	TRUE	0.0453
MD00G1159300	5267	5864	5631	6406	7434	6574	4542	5459	3797	4848	4600	4772	5937	6029	6315	4638	5004	4513	7029.16	4740	6094	4718	1.267	0.342	3.081	0.00206296	0.00463226	0.0097	0.0088	0.0098	0.0098	TRUE	0.0354	0.996	-0.006	-0.054	0.956705	0.973438	0.0097	0.0088	0.0098	0.0098	TRUE	0.0354
MD00G1159400	486	502	590	306	384	290	351	437	349	447	394	500	284	311	279	358	401	415	460.13	447	291	391	0.676	-0.564	-3.857	0.000114577	0.00032543	0.0178	0.012	0.016	0.016	TRUE	0.3425	0.894	-0.162	-1.208	0.226869	0.315351	0.0178	0.012	0.016	0.016	TRUE	0.3425
MD00G1159500	152	145	142	91	96	90	71	76	74	140	114	120	84	78	86	73	70	88	125.67	125	83	77	0.691	-0.534	-3.598	0.000321155	0.000843014	0	0.0211	0.0104	0.0104	TRUE	0.0681	0.645	-0.633	-4.173	2.99983e-05	0.000107149	0	0.0211	0.0104	0.0104	TRUE	0.0681
MD00G1159900	167	160	166	291	393	260	191	225	173	154	126	141	270	319	250	195	206	206	185.94	140	280	202	1.949	0.963	7.08	1.44199e-12	1.12753e-11	0.0057	0.017	0.0098	0.0098	TRUE	0.0884	1.393	0.478	3.653	0.000258871	0.000780634	0.0057	0.017	0.0098	0.0098	TRUE	0.0884
MD00G1160000	63	66	55	152	149	136	78	102	53	58	52	47	141	121	131	80	94	63	73.25	52	131	79	2.416	1.272	6.766	1.321e-11	9.32777e-11	0	0.03	0.0162	0.0162	TRUE	0.0944	1.417	0.503	2.938	0.00330707	0.00791939	0	0.03	0.0162	0.0162	TRUE	0.0944
MD00G1160200	125	148	108	98	124	81	152	156	151	115	116	92	91	101	78	155	143	179	182.61	108	90	159	0.862	-0.213	-1.173	0.240863	0.318472	0.0312	0.0172	0.0261	0.0261	TRUE	0.0397	1.369	0.453	2.617	0.00886837	0.0191367	0.0312	0.0172	0.0261	0.0261	TRUE	0.0397
MD00G1160300	76	138	93	108	153	137	237	284	254	70	108	79	100	124	132	242	260	302	417.6	86	119	268	1.332	0.414	2.76	0.00577147	0.011819	0.0106	0.0124	0.0114	0.0114	TRUE	0.2705	3.05	1.609	10.259	1.07439e-24	2.4564e-23	0.0106	0.0124	0.0114	0.0114	TRUE	0.2705
MD00G1160400	0	1	0	0	0	0	0	0	0	0	1	0	0	0	0	0	0	0	0.14	0	0	0	0.948	-0.076	-0.2	0.841335	NA	0	11.0946	12	12	TRUE	0.1785	0.963	-0.055	-0.153	0.87841	NA	0	11.0946	12	12	TRUE	0.1785
MD00G1160500	776	917	717	706	740	656	719	735	557	714	719	608	654	600	630	734	674	662	636.15	680	628	690	0.927	-0.109	-1.017	0.309153	0.393472	0.0067	0.0111	0.008	0.008	TRUE	0.1202	1.013	0.019	0.18	0.8572	0.897767	0.0067	0.0111	0.008	0.008	TRUE	0.1202
MD00G1160600	329	367	280	399	497	418	335	347	253	303	288	237	370	403	402	342	318	301	333.8	276	392	320	1.391	0.477	4.162	3.16061e-05	9.84867e-05	0.0052	0.0133	0.0079	0.0079	TRUE	0.0853	1.144	0.194	1.746	0.0807618	0.132338	0.0052	0.0133	0.0079	0.0079	TRUE	0.0853
MD00G1160700	5614	5975	5628	8712	8833	8101	4992	5845	3704	5168	4687	4770	8074	7164	7782	5098	5358	4403	4989.11	4875	7673	4953	1.553	0.635	7.141	9.25156e-13	7.41118e-12	0.0048	0.0089	0.0059	0.0059	TRUE	0.0572	1.015	0.022	0.255	0.79866	0.851502	0.0048	0.0089	0.0059	0.0059	TRUE	0.0572
MD00G1160800	0	0	0	0	2	2	0	1	0	0	0	0	0	2	2	0	1	0	0.62	0	1	0	1.424	0.509	1.137	0.255524	NA	6.3017	2.5458	3.377	3.377	TRUE	0.4877	1.119	0.163	0.457	0.647404	NA	6.3017	2.5458	3.377	3.377	TRUE	0.4877
MD00G1160900	0	0	0	0	0	0	0	0	0	0	0	0	0	0	0	0	0	0	0	0	0	0	1	0	NA	NA	NA	NA	NA	NA	NA	NA	NA	1	0	NA	NA	NA	NA	NA	NA	NA	NA	NA
MD00G1161000	51	46	48	27	27	18	29	49	26	47	36	41	25	22	17	30	45	31	39.12	41	21	35	0.58	-0.785	-3.394	0.000688892	0.00170253	0	0.0486	0.0239	0.0239	TRUE	0.2318	0.903	-0.147	-0.819	0.412796	0.512849	0	0.0486	0.0239	0.0239	TRUE	0.2318
MD00G1161100	0	1	1	0	0	0	0	0	0	0	1	1	0	0	0	0	0	0	0.33	1	0	0	0.851	-0.234	-0.591	0.554347	NA	0	4.6905	4.4361	4.4361	TRUE	0.0419	0.877	-0.19	-0.52	0.602794	NA	0	4.6905	4.4361	4.4361	TRUE	0.0419
MD00G1161300	662	790	779	857	1117	736	702	911	797	609	620	660	794	906	707	717	835	947	635.49	630	802	833	1.254	0.327	2.733	0.0062676	0.0127338	0.0104	0.0111	0.0106	0.0106	TRUE	0.0574	1.286	0.363	3.132	0.00173609	0.00441873	0.0104	0.0111	0.0106	0.0106	TRUE	0.0574
MD00G1161400	3	4	3	20	9	16	16	14	9	3	3	3	19	7	15	16	13	11	11.02	3	14	13	3.686	1.882	3.719	0.000199933	0.000544278	0	0.1506	0.085	0.085	TRUE	0.3202	3.622	1.857	3.635	0.000278243	0.000835134	0	0.1506	0.085	0.085	TRUE	0.3202
MD00G1161500	2	1	0	1	0	0	0	4	1	2	1	0	1	0	0	0	4	1	0.7	1	0	2	0.849	-0.237	-0.626	0.53129	NA	0	2.2402	2.2725	2.2725	TRUE	0.0908	1.107	0.146	0.445	0.656401	NA	0	2.2402	2.2725	2.2725	TRUE	0.0908
MD00G1161600	18	22	16	12	19	16	12	13	11	17	17	14	11	15	15	12	12	13	14.72	16	14	12	0.925	-0.112	-0.466	0.641538	0.714331	0	0.1148	0.0435	0.0435	TRUE	0.0716	0.876	-0.192	-0.893	0.371924	0.471848	0	0.1148	0.0435	0.0435	TRUE	0.0716
MD00G1161700	2	0	0	0	2	0	0	0	0	2	0	0	0	2	0	0	0	0	0.68	1	1	0	0.99	-0.014	-0.039	0.96885	NA	7.0854	2.3003	3.3711	3.3711	TRUE	0.2086	0.855	-0.227	-0.622	0.533886	NA	7.0854	2.3003	3.3711	3.3711	TRUE	0.2086
MD00G1162000	0	1	1	1	1	1	1	5	2	0	1	1	1	1	1	1	5	2	3.35	1	1	3	1.112	0.154	0.465	0.641604	0.714362	0	0.4754	0.2506	0.2506	TRUE	0.0916	1.71	0.774	1.763	0.0779337	0.128205	0	0.4754	0.2506	0.2506	TRUE	0.0916
MD00G1162100	0	1	0	1	0	2	0	1	0	0	1	0	1	0	2	0	1	0	0.77	0	1	0	1.228	0.296	0.775	0.438221	0.525747	0	2.0319	1.631	1.631	TRUE	0.149	1.029	0.042	0.128	0.898075	0.92809	0	2.0319	1.631	1.631	TRUE	0.149
MD00G1162200	2	0	1	42	40	33	12	18	18	2	0	1	39	32	32	12	17	21	13.99	1	34	17	32.121	5.005	5.975	2.30211e-09	1.26766e-08	0	0.1204	0.0633	0.0633	TRUE	0.2094	15.32	3.937	4.726	2.28703e-06	9.7903e-06	0	0.1204	0.0633	0.0633	TRUE	0.2094
MD00G1162300	0	3	1	1	3	1	0	2	1	0	2	1	1	2	1	0	2	1	2.21	1	1	1	1.076	0.105	0.333	0.739433	0.798329	0	0.7151	0.3975	0.3975	TRUE	0.1171	0.983	-0.024	-0.086	0.931109	0.953643	0	0.7151	0.3975	0.3975	TRUE	0.1171
MD00G1162900	1	1	2	28	37	23	37	47	31	1	1	2	26	30	22	38	43	37	25.01	1	26	39	19.651	4.297	5.856	4.73271e-09	2.50864e-08	0	0.0711	0.0392	0.0392	TRUE	0.3092	29.419	4.879	6.651	2.9136e-11	2.34055e-10	0	0.0711	0.0392	0.0392	TRUE	0.3092
MD00G1163000	196	294	241	193	270	242	227	211	169	180	231	204	179	219	232	232	193	201	210.43	205	210	209	1.02	0.029	0.181	0.856016	0.895217	0.0224	0.0161	0.02	0.02	TRUE	0.3184	1.013	0.019	0.127	0.899251	0.928919	0.0224	0.0161	0.02	0.02	TRUE	0.3184
MD00G1163200	3	5	2	7	8	16	17	19	15	3	4	2	6	6	15	17	17	18	7.6	3	9	17	2.146	1.102	2.582	0.00981174	0.01911	0	0.2145	0.1262	0.1262	TRUE	0.5105	4.966	2.312	4.046	5.20761e-05	0.000178223	0	0.2145	0.1262	0.1262	TRUE	0.5105
MD00G1163300	11	23	16	22	23	17	16	30	13	10	18	14	20	19	16	16	28	15	13.11	14	18	20	1.184	0.244	0.956	0.339233	0.425151	0	0.1279	0.0711	0.0711	TRUE	0.2691	1.211	0.276	1.218	0.223357	0.311445	0	0.1279	0.0711	0.0711	TRUE	0.2691
MD00G1163400	215	242	209	85	98	77	81	76	79	198	190	177	79	79	74	83	70	94	388.26	188	77	82	0.422	-1.244	-8.065	7.31461e-16	7.74452e-15	0	0.0126	0.0101	0.0101	TRUE	0.076	0.444	-1.172	-7.488	6.98513e-14	7.36639e-13	0	0.0126	0.0101	0.0101	TRUE	0.076
MD00G1163500	0	0	0	0	0	0	0	0	0	0	0	0	0	0	0	0	0	0	0	0	0	0	1	0	NA	NA	NA	NA	NA	NA	NA	NA	NA	1	0	NA	NA	NA	NA	NA	NA	NA	NA	NA
MD00G1163800	66	53	74	18	24	14	20	17	20	61	42	63	17	19	13	20	16	24	25.14	55	16	20	0.331	-1.594	-5.191	2.09129e-07	8.95033e-07	0	0.0708	0.0447	0.0447	TRUE	0.2256	0.397	-1.333	-4.465	7.99023e-06	3.13869e-05	0	0.0708	0.0447	0.0447	TRUE	0.2256
MD00G1163900	7	15	22	20	20	17	12	16	6	6	12	19	19	16	16	12	15	7	10.76	12	17	11	1.201	0.265	0.992	0.320974	0.406035	0	0.154	0.0961	0.0961	TRUE	0.1028	0.969	-0.045	-0.205	0.837784	0.882812	0	0.154	0.0961	0.0961	TRUE	0.1028
MD00G1164000	740	910	769	693	847	670	618	705	548	681	714	652	642	687	644	631	646	651	709.11	682	658	643	0.965	-0.051	-0.685	0.493619	0.579823	0	0.0108	0.003	0.003	TRUE	0.0114	0.945	-0.082	-1.108	0.267829	0.361324	0	0.0108	0.003	0.003	TRUE	0.0114
MD00G1164200	0	0	0	0	0	0	1	0	0	0	0	0	0	0	0	1	0	0	0.09	0	0	0	1	0	0	1	NA	0	18.3825	12	12	TRUE	0.2059	1.074	0.103	0.283	0.77683	NA	0	18.3825	12	12	TRUE	0.2059
MD00G1164300	0	0	0	0	1	0	1	0	0	0	0	0	0	1	0	1	0	0	0.15	0	0	0	1.065	0.09	0.236	0.813239	NA	0	10.2492	12	12	TRUE	0.2059	1.074	0.103	0.283	0.776832	NA	0	10.2492	12	12	TRUE	0.2059
MD00G1164400	0	0	0	0	0	0	0	0	1	0	0	0	0	0	0	0	0	1	0.1	0	0	0	1	0	0	1	NA	0	15.793	12	12	TRUE	0.2804	1.074	0.103	0.283	0.77683	NA	0	15.793	12	12	TRUE	0.2804
MD00G1164600	0	0	0	0	0	0	0	0	0	0	0	0	0	0	0	0	0	0	0	0	0	0	1	0	NA	NA	NA	NA	NA	NA	NA	NA	NA	1	0	NA	NA	NA	NA	NA	NA	NA	NA	NA
MD00G1164700	21	44	27	3	10	10	37	35	34	19	35	23	3	8	10	38	32	40	18.37	26	7	37	0.316	-1.663	-4.159	3.1935e-05	9.94036e-05	0.0353	0.0937	0.0697	0.0697	TRUE	0.4148	1.232	0.301	1.372	0.170096	0.248205	0.0353	0.0937	0.0697	0.0697	TRUE	0.4148
MD00G1164900	392	467	504	335	413	362	253	314	220	361	366	427	310	335	348	258	288	262	297.72	385	331	269	0.871	-0.199	-1.549	0.121501	0.176542	0.0107	0.0139	0.0117	0.0117	TRUE	0.2537	0.727	-0.461	-3.593	0.000326689	0.000967535	0.0107	0.0139	0.0117	0.0117	TRUE	0.2537
MD00G1165000	273	315	226	183	204	175	191	189	157	251	247	192	170	165	168	195	173	187	180.32	230	168	185	0.746	-0.423	-3.368	0.000758407	0.00185729	0	0.0173	0.0087	0.0087	TRUE	0.1199	0.824	-0.279	-2.32	0.0203345	0.0399216	0	0.0173	0.0087	0.0087	TRUE	0.1199
MD00G1165100	126	158	131	74	99	62	19	18	16	116	124	111	69	80	60	19	17	19	80.24	117	70	18	0.626	-0.675	-4.118	3.8253e-05	0.000117546	0	0.0281	0.0136	0.0136	TRUE	0.0911	0.16	-2.648	-10.668	1.4369e-26	3.64256e-25	0	0.0281	0.0136	0.0136	TRUE	0.0911
MD00G1165200	668	870	747	639	977	669	836	991	785	615	682	633	592	792	643	854	908	933	685.09	643	676	898	1.044	0.062	0.408	0.683593	0.751199	0.0269	0.0109	0.0206	0.0206	TRUE	0.5014	1.327	0.409	2.767	0.0056606	0.0127914	0.0269	0.0109	0.0206	0.0206	TRUE	0.5014
MD00G1165300	2	2	0	1016	1305	949	978	1126	662	2	2	0	942	1058	912	999	1032	787	669.26	1	971	939	684.465	9.419	13.232	5.73299e-40	2.52699e-38	0	0.011	0.0156	0.0156	TRUE	0.2372	665.965	9.379	13.167	1.35079e-39	6.34396e-38	0	0.011	0.0156	0.0156	TRUE	0.2372
MD00G1165400	717	784	781	594	732	521	498	639	467	660	615	662	550	594	500	509	586	555	556.56	646	548	550	0.856	-0.225	-2.514	0.0119365	0.0227528	0.0022	0.0114	0.0048	0.0048	TRUE	0.0337	0.861	-0.216	-2.455	0.0141013	0.0288715	0.0022	0.0114	0.0048	0.0048	TRUE	0.0337
MD00G1165500	8	7	10	3	4	2	2	9	5	7	5	8	3	3	2	2	8	6	4.86	7	3	5	0.606	-0.723	-1.94	0.0523887	0.0846913	0	0.3306	0.1516	0.1516	TRUE	0.1687	0.907	-0.141	-0.58	0.562041	0.653161	0	0.3306	0.1516	0.1516	TRUE	0.1687
MD00G1165600	4	4	2	1	3	5	5	7	1	4	3	2	1	2	5	5	6	1	2.86	3	3	4	0.986	-0.021	-0.07	0.94452	0.965862	0	0.5557	0.3519	0.3519	TRUE	0.3611	1.131	0.178	0.661	0.508834	0.604724	0	0.5557	0.3519	0.3519	TRUE	0.3611
MD00G1165700	25	39	31	0	0	0	0	1	0	23	31	26	0	0	0	0	1	0	6.73	27	0	0	0.011	-6.531	-5.749	8.95171e-09	4.58277e-08	0	0.2408	0.1573	0.1573	TRUE	0.1446	0.023	-5.433	-4.833	1.34734e-06	5.97196e-06	0	0.2408	0.1573	0.1573	TRUE	0.1446
MD00G1165800	6	11	9	15	16	8	5	12	13	6	9	8	14	13	8	5	11	15	10.45	8	12	10	1.295	0.373	1.323	0.185866	0.254842	0	0.1582	0.0844	0.0844	TRUE	0.1323	1.176	0.234	0.984	0.325003	0.423265	0	0.1582	0.0844	0.0844	TRUE	0.1323
MD00G1165900	0	0	0	0	0	0	0	0	0	0	0	0	0	0	0	0	0	0	0	0	0	0	1	0	NA	NA	NA	NA	NA	NA	NA	NA	NA	1	0	NA	NA	NA	NA	NA	NA	NA	NA	NA
MD00G1166100	26	22	35	18	24	22	40	38	30	24	17	30	17	19	21	41	35	36	34.5	24	19	37	0.861	-0.216	-0.97	0.331968	0.417493	0	0.0539	0.0279	0.0279	TRUE	0.198	1.392	0.477	2.281	0.0225402	0.0437405	0	0.0539	0.0279	0.0279	TRUE	0.198
MD00G1166300	0	0	0	25	23	17	39	45	37	0	0	0	23	19	16	40	41	44	15.27	0	19	42	75.524	6.239	5.69	1.26846e-08	6.38942e-08	0	0.111	0.0538	0.0538	TRUE	0.0789	155.696	7.283	6.626	3.45874e-11	2.75767e-10	0	0.111	0.0538	0.0538	TRUE	0.0789
MD00G1166400	57	69	65	35	37	40	23	31	27	52	54	55	32	30	38	23	28	32	29.76	54	33	28	0.676	-0.564	-2.721	0.00651017	0.0131844	0	0.0612	0.0246	0.0246	TRUE	0.0619	0.574	-0.801	-3.575	0.000349687	0.00102984	0	0.0612	0.0246	0.0246	TRUE	0.0619
MD00G1166500	1	2	2	3	4	0	0	2	0	1	2	2	3	3	0	0	2	0	1.13	2	2	1	1.089	0.122	0.375	0.70783	0.771449	0	1.3974	0.953	0.953	TRUE	0.486	0.866	-0.207	-0.648	0.516867	0.612086	0	1.3974	0.953	0.953	TRUE	0.486
MD00G1166600	0	0	0	0	0	0	0	0	0	0	0	0	0	0	0	0	0	0	0	0	0	0	1	0	NA	NA	NA	NA	NA	NA	NA	NA	NA	1	0	NA	NA	NA	NA	NA	NA	NA	NA	NA
MD00G1166700	56	66	67	72	78	75	65	67	49	52	52	57	67	63	72	66	61	58	54.22	54	67	62	1.215	0.28	1.591	0.111595	0.163995	0	0.0375	0.017	0.017	TRUE	0.2818	1.121	0.165	1.017	0.309347	0.406482	0	0.0375	0.017	0.017	TRUE	0.2818
MD00G1166800	2	1	3	0	1	1	0	0	1	2	1	3	0	1	1	0	0	1	0.75	2	1	0	0.792	-0.336	-0.901	0.367368	0.454563	0	2.085	1.072	1.072	TRUE	0.2494	0.716	-0.483	-1.23	0.218664	0.305999	0	2.085	1.072	1.072	TRUE	0.2494
MD00G1166900	0	0	0	0	0	0	0	0	0	0	0	0	0	0	0	0	0	0	0	0	0	0	1	0	NA	NA	NA	NA	NA	NA	NA	NA	NA	1	0	NA	NA	NA	NA	NA	NA	NA	NA	NA
MD00G1167000	4	8	2	64	71	61	40	31	26	4	6	2	59	58	59	41	28	31	28.16	4	59	33	14.065	3.814	8.567	1.06562e-17	1.30585e-16	0	0.0641	0.0335	0.0335	TRUE	0.3146	7.87	2.976	6.611	3.81091e-11	3.01974e-10	0	0.0641	0.0335	0.0335	TRUE	0.3146
MD00G1167500	0	0	0	2	0	1	0	0	0	0	0	0	2	0	1	0	0	0	0.23	0	1	0	1.179	0.237	0.597	0.550531	NA	0	6.6762	12	12	TRUE	0.0073	1	0	0	1	NA	0	6.6762	12	12	TRUE	0.0073
MD00G1167700	135	153	145	143	149	111	105	139	94	124	120	123	133	121	107	107	127	112	122.35	122	120	115	0.983	-0.024	-0.17	0.864688	0.901835	0.0024	0.0214	0.0109	0.0109	TRUE	0.1245	0.955	-0.067	-0.495	0.620452	0.703927	0.0024	0.0214	0.0109	0.0109	TRUE	0.1245
MD00G1167800	4	1	6	0	2	0	0	0	1	4	1	5	0	2	0	0	0	1	1.03	3	1	0	0.658	-0.603	-1.352	0.176316	0.243467	0	1.5264	1.5016	1.5016	TRUE	0.1682	0.579	-0.788	-1.619	0.105553	0.166037	0	1.5264	1.5016	1.5016	TRUE	0.1682
MD00G1167900	0	0	0	0	0	0	0	0	0	0	0	0	0	0	0	0	0	0	0	0	0	0	1	0	NA	NA	NA	NA	NA	NA	NA	NA	NA	1	0	NA	NA	NA	NA	NA	NA	NA	NA	NA
MD00G1168000	33	41	54	12	8	4	17	19	21	30	32	46	11	6	4	17	17	25	17.31	36	7	20	0.222	-2.172	-5.245	1.56081e-07	6.78457e-07	0.0314	0.099	0.0685	0.0685	TRUE	0.4624	0.67	-0.577	-2.263	0.0236269	0.0455722	0.0314	0.099	0.0685	0.0685	TRUE	0.4624
MD00G1168100	42	35	49	35	34	35	81	72	57	39	27	42	32	28	34	83	66	68	39.3	36	31	72	0.899	-0.154	-0.756	0.449894	0.537445	0	0.0484	0.0243	0.0243	TRUE	0.1757	1.861	0.896	4.134	3.56541e-05	0.000125606	0	0.0484	0.0243	0.0243	TRUE	0.1757
MD00G1168200	125	121	129	9	18	6	5	16	14	115	95	109	8	15	6	5	15	17	41.16	106	10	12	0.095	-3.398	-9.854	6.58113e-23	1.17646e-21	0.0161	0.0466	0.0382	0.0382	TRUE	0.5078	0.117	-3.09	-9.142	6.14938e-20	1.03901e-18	0.0161	0.0466	0.0382	0.0382	TRUE	0.5078
MD00G1168300	29	36	44	38	27	38	17	20	29	27	28	37	35	22	37	17	18	34	28.24	31	31	23	1.006	0.009	0.039	0.968923	0.982864	0.0455	0.064	0.054	0.054	TRUE	0.4432	0.842	-0.247	-1.176	0.239741	0.330179	0.0455	0.064	0.054	0.054	TRUE	0.4432
MD00G1168400	85	62	69	21	16	20	11	7	16	78	49	58	19	13	19	11	6	19	29.05	62	17	12	0.305	-1.713	-5.246	1.55209e-07	6.74876e-07	0.0502	0.0624	0.0564	0.0564	TRUE	0.1903	0.208	-2.266	-6.168	6.9327e-10	4.77415e-09	0.0502	0.0624	0.0564	0.0564	TRUE	0.1903
MD00G1168500	1	0	0	3	2	2	0	2	1	1	0	0	3	2	2	0	2	1	1.48	0	2	1	1.84	0.879	1.731	0.0834856	0.127235	0	1.0662	0.6557	0.6557	TRUE	0.1619	1.282	0.359	1.008	0.313576	0.410894	0	1.0662	0.6557	0.6557	TRUE	0.1619
MD00G1168600	0	0	0	0	0	0	0	0	0	0	0	0	0	0	0	0	0	0	0	0	0	0	1	0	NA	NA	NA	NA	NA	NA	NA	NA	NA	1	0	NA	NA	NA	NA	NA	NA	NA	NA	NA
MD00G1168700	5	9	6	24	7	13	11	32	17	5	7	5	22	6	12	11	29	20	11.54	6	13	20	1.597	0.675	1.924	0.0543461	0.0874727	0.24	0.1441	0.1971	0.1971	TRUE	0.145	2.448	1.292	2.886	0.00390141	0.00918748	0.24	0.1441	0.1971	0.1971	TRUE	0.145
MD00G1168800	203	209	220	193	201	164	183	192	159	187	164	186	179	163	158	187	176	189	158.81	179	167	184	0.936	-0.096	-0.78	0.435584	0.523239	0	0.0185	0.0077	0.0077	TRUE	0.0976	1.024	0.034	0.29	0.771589	0.830089	0	0.0185	0.0077	0.0077	TRUE	0.0976
MD00G1169400	4	4	5	4	2	0	5	5	4	4	3	4	4	2	0	5	5	5	6	4	2	5	0.747	-0.422	-1.27	0.204031	0.276073	0	0.2692	0.1177	0.1177	TRUE	0.3666	1.101	0.139	0.565	0.57237	0.662139	0	0.2692	0.1177	0.1177	TRUE	0.3666
MD00G1169500	121	138	125	48	43	53	43	53	47	111	108	106	44	35	51	44	49	56	64.37	108	43	50	0.416	-1.264	-6.29	3.18445e-10	1.93338e-09	0	0.0329	0.0179	0.0179	TRUE	0.1995	0.477	-1.068	-5.378	7.52742e-08	3.98662e-07	0	0.0329	0.0179	0.0179	TRUE	0.1995
MD00G1169600	346	383	358	562	574	465	336	341	243	318	300	303	521	466	447	343	313	289	405.78	307	478	315	1.529	0.613	6.195	5.81438e-10	3.43013e-09	0.0019	0.0125	0.0053	0.0053	TRUE	0.0359	1.024	0.034	0.348	0.728067	0.795307	0.0019	0.0125	0.0053	0.0053	TRUE	0.0359
MD00G1169700	0	0	0	0	0	0	0	0	0	0	0	0	0	0	0	0	0	0	0	0	0	0	1	0	NA	NA	NA	NA	NA	NA	NA	NA	NA	1	0	NA	NA	NA	NA	NA	NA	NA	NA	NA
MD00G1169800	0	0	0	0	0	0	0	0	0	0	0	0	0	0	0	0	0	0	0	0	0	0	1	0	NA	NA	NA	NA	NA	NA	NA	NA	NA	1	0	NA	NA	NA	NA	NA	NA	NA	NA	NA
MD00G1169900	0	0	0	0	0	0	0	0	0	0	0	0	0	0	0	0	0	0	0	0	0	0	1	0	NA	NA	NA	NA	NA	NA	NA	NA	NA	1	0	NA	NA	NA	NA	NA	NA	NA	NA	NA
MD00G1170000	7	3	3	2	3	6	4	1	3	6	2	3	2	2	6	4	1	4	2.5	4	3	3	0.963	-0.054	-0.181	0.856601	0.895633	0	0.6349	0.3958	0.3958	TRUE	0.3228	0.925	-0.112	-0.423	0.672464	0.748655	0	0.6349	0.3958	0.3958	TRUE	0.3228
MD00G1170100	0	0	0	0	0	0	0	0	0	0	0	0	0	0	0	0	0	0	0	0	0	0	1	0	NA	NA	NA	NA	NA	NA	NA	NA	NA	1	0	NA	NA	NA	NA	NA	NA	NA	NA	NA
MD00G1170400	1	1	1	0	0	0	0	0	0	1	1	1	0	0	0	0	0	0	0.58	1	0	0	0.732	-0.45	-1.064	0.287529	NA	0	2.7229	2.0613	2.0613	TRUE	0.0664	0.774	-0.37	-0.97	0.332059	NA	0	2.7229	2.0613	2.0613	TRUE	0.0664
MD00G1170600	0	0	0	1	0	0	1	1	0	0	0	0	1	0	0	1	1	0	0.24	0	0	1	1.075	0.105	0.271	0.786121	NA	0	6.5585	8.6122	8.6122	TRUE	0.2275	1.152	0.204	0.543	0.587179	NA	0	6.5585	8.6122	8.6122	TRUE	0.2275
MD00G1170700	105	117	141	5	15	7	20	22	12	97	92	119	5	12	7	20	20	14	99.23	103	8	18	0.08	-3.638	-11.489	1.50169e-30	4.10596e-29	0.0002	0.0244	0.0139	0.0139	TRUE	0.4232	0.186	-2.43	-9.79	1.24117e-22	2.49506e-21	0.0002	0.0244	0.0139	0.0139	TRUE	0.4232
MD00G1170800	118	124	115	133	137	137	174	158	118	109	97	97	123	111	132	178	145	140	147.02	101	122	154	1.183	0.242	1.688	0.0913595	0.137687	0.0049	0.0193	0.0105	0.0105	TRUE	0.0925	1.461	0.547	3.869	0.000109185	0.00035346	0.0049	0.0193	0.0105	0.0105	TRUE	0.0925
MD00G1170900	0	2	0	0	0	1	2	1	0	0	2	0	0	0	1	2	1	0	0.76	1	0	1	0.912	-0.133	-0.377	0.70626	0.770207	0	2.0623	1.1962	1.1962	TRUE	0.2331	1.111	0.152	0.476	0.634135	0.71596	0	2.0623	1.1962	1.1962	TRUE	0.2331
MD00G1171100	1928	2110	1864	2696	2771	2384	1512	1782	1174	1775	1655	1580	2498	2247	2290	1544	1634	1396	1720.47	1670	2345	1525	1.367	0.451	3.345	0.000823613	0.00200356	0.0166	0.0095	0.015	0.015	TRUE	0.3095	0.925	-0.112	-0.89	0.373553	0.473513	0.0166	0.0095	0.015	0.015	TRUE	0.3095
MD00G1171200	1262	1637	1652	1023	1117	1001	899	1085	877	1162	1284	1400	948	906	962	918	995	1042	1120.49	1282	939	985	0.757	-0.402	-2.658	0.00786555	0.0156455	0.0249	0.01	0.0199	0.0199	TRUE	0.4686	0.801	-0.32	-2.243	0.0248772	0.0476709	0.0249	0.01	0.0199	0.0199	TRUE	0.4686
MD00G1171400	0	1	1	2	0	3	1	2	1	0	1	1	2	0	3	1	2	1	1.11	1	2	1	1.255	0.327	0.885	0.375902	0.463446	0	1.4145	0.9412	0.9412	TRUE	0.3346	1.188	0.249	0.757	0.449226	0.548155	0	1.4145	0.9412	0.9412	TRUE	0.3346
MD00G1171500	0	0	0	0	0	0	0	0	0	0	0	0	0	0	0	0	0	0	0	0	0	0	1	0	NA	NA	NA	NA	NA	NA	NA	NA	NA	1	0	NA	NA	NA	NA	NA	NA	NA	NA	NA
MD00G1171600	92	94	103	148	160	121	106	144	103	85	74	87	137	130	116	108	132	122	90.34	82	128	121	1.497	0.582	3.738	0.000185602	0.000508082	0.0006	0.0259	0.0127	0.0127	TRUE	0.195	1.402	0.487	3.224	0.0012643	0.00331195	0.0006	0.0259	0.0127	0.0127	TRUE	0.195
MD00G1171700	14	15	11	51	49	46	30	32	30	13	12	9	47	40	44	31	29	36	49.42	11	44	32	3.624	1.858	6.391	1.64576e-10	1.02953e-09	0	0.0403	0.0192	0.0192	TRUE	0.0218	2.566	1.359	4.673	2.96391e-06	1.24689e-05	0	0.0403	0.0192	0.0192	TRUE	0.0218
MD00G1171800	129	153	132	70	76	64	93	91	58	119	120	112	65	62	61	95	83	69	147.66	117	63	82	0.558	-0.841	-5.406	6.44432e-08	2.96056e-07	0	0.0192	0.0092	0.0092	TRUE	0.0442	0.742	-0.431	-3.053	0.00226704	0.00563247	0	0.0192	0.0092	0.0092	TRUE	0.0442
MD00G1171900	766	851	857	824	1063	777	736	903	669	705	668	726	764	862	746	752	828	795	737.67	700	791	792	1.127	0.172	2.061	0.0393488	0.0659706	0.002	0.0107	0.0042	0.0042	TRUE	0.038	1.124	0.169	2.05	0.0403515	0.0727966	0.002	0.0107	0.0042	0.0042	TRUE	0.038
MD00G1172000	2	1	2	0	0	1	6	4	3	2	1	2	0	0	1	6	4	4	1.95	2	0	5	0.664	-0.592	-1.387	0.165299	0.230292	0	0.8116	0.4283	0.4283	TRUE	0.4119	1.463	0.549	1.523	0.127702	0.194981	0	0.8116	0.4283	0.4283	TRUE	0.4119
MD00G1172100	290	365	383	174	203	165	214	251	185	267	286	325	161	165	159	219	230	220	340.81	293	162	223	0.608	-0.717	-3.256	0.00113015	0.00267442	0.0662	0.0132	0.0458	0.0458	TRUE	0.1151	0.825	-0.278	-1.498	0.134111	0.203079	0.0662	0.0132	0.0458	0.0458	TRUE	0.1151
MD00G1172200	11	14	14	6	7	13	0	0	0	10	11	12	6	6	12	0	0	0	5.8	11	8	0	0.854	-0.228	-0.796	0.42603	0.513999	0.0179	0.2781	0.1739	0.1739	TRUE	0.1837	0.029	-5.097	-4.51	6.4701e-06	2.57795e-05	0.0179	0.2781	0.1739	0.1739	TRUE	0.1837
MD00G1172400	56	68	55	33	46	36	30	32	20	52	53	47	31	37	35	31	29	24	35.98	51	34	28	0.726	-0.462	-2.343	0.0191388	0.0347614	0	0.0521	0.0199	0.0199	TRUE	0.0561	0.616	-0.7	-3.328	0.000875035	0.00237759	0	0.0521	0.0199	0.0199	TRUE	0.0561
MD00G1172500	42	48	55	27	29	32	36	36	47	39	38	47	25	24	31	37	33	56	28.37	41	27	42	0.715	-0.483	-2.11	0.0348883	0.0593245	0	0.0637	0.0383	0.0383	TRUE	0.3277	1.008	0.011	0.06	0.951954	0.969817	0	0.0637	0.0383	0.0383	TRUE	0.3277
MD00G1172600	10	14	5	11	7	8	9	6	6	9	11	4	10	6	8	9	6	7	8.28	8	8	7	0.98	-0.03	-0.108	0.913914	0.941692	0	0.1974	0.1385	0.1385	TRUE	0.6732	0.955	-0.066	-0.284	0.776108	0.833412	0	0.1974	0.1385	0.1385	TRUE	0.6732
MD00G1172700	2	0	0	2	0	2	1	0	1	2	0	0	2	0	2	1	0	1	0.73	1	1	1	1.144	0.194	0.54	0.589166	0.668329	0	2.157	1.7391	1.7391	TRUE	0.4875	1.029	0.042	0.13	0.896773	0.927182	0	2.157	1.7391	1.7391	TRUE	0.4875
MD00G1172900	443	504	471	0	0	0	0	0	0	408	395	399	0	0	0	0	0	0	100.42	401	0	0	0.001	-10.374	-9.479	2.56274e-21	4.08396e-20	0	0.0242	0.0133	0.0133	TRUE	0.7134	0.001	-10.177	-9.304	1.3547e-20	2.4067e-19	0	0.0242	0.0133	0.0133	TRUE	0.7134
MD00G1173000	0	0	0	0	0	0	0	0	0	0	0	0	0	0	0	0	0	0	0	0	0	0	1	0	NA	NA	NA	NA	NA	NA	NA	NA	NA	1	0	NA	NA	NA	NA	NA	NA	NA	NA	NA
MD00G1173100	0	0	0	0	0	0	0	1	0	0	0	0	0	0	0	0	1	0	0.08	0	0	0	1	0	0	1	NA	0	20.4757	12	12	TRUE	0.1613	1.074	0.103	0.283	0.77683	NA	0	20.4757	12	12	TRUE	0.1613
MD00G1173200	0	0	0	0	0	1	0	0	0	0	0	0	0	0	1	0	0	0	0.08	0	0	0	1.065	0.09	0.236	0.813237	NA	0	19.5408	12	12	TRUE	0.2449	1	0	0	1	NA	0	19.5408	12	12	TRUE	0.2449
MD00G1173300	799	941	793	1101	1215	1049	699	793	558	735	738	672	1020	985	1008	714	727	663	1007.34	715	1004	701	1.388	0.473	5.327	9.99836e-08	4.45979e-07	0.0034	0.0102	0.0051	0.0051	TRUE	0.0567	0.983	-0.025	-0.286	0.774555	0.832104	0.0034	0.0102	0.0051	0.0051	TRUE	0.0567
MD00G1173500	0	0	0	0	0	0	0	0	0	0	0	0	0	0	0	0	0	0	0	0	0	0	1	0	NA	NA	NA	NA	NA	NA	NA	NA	NA	1	0	NA	NA	NA	NA	NA	NA	NA	NA	NA
MD00G1173600	189	244	210	35	36	33	54	59	51	174	191	178	32	29	32	55	54	61	73.04	181	31	57	0.174	-2.521	-12.872	6.48315e-38	2.55557e-36	0	0.03	0.0114	0.0114	TRUE	0.049	0.318	-1.651	-9.438	3.78869e-21	6.94594e-20	0	0.03	0.0114	0.0114	TRUE	0.049
MD00G1173700	763	820	976	687	968	564	524	849	803	702	643	827	637	785	542	535	778	955	721.9	724	655	756	0.934	-0.099	-0.426	0.669884	0.739285	0.083	0.0108	0.0533	0.083	TRUE	0.2571	1.025	0.036	0.18	0.857141	0.897767	0.083	0.0108	0.0533	0.083	TRUE	0.2571
MD00G1173800	0	0	0	2	0	0	0	0	0	0	0	0	2	0	0	0	0	0	0.26	0	1	0	1.13	0.177	0.453	0.650219	NA	0	6.0117	12	12	TRUE	0.4871	1	0	0	1	NA	0	6.0117	12	12	TRUE	0.4871
MD00G1173900	0	1	0	0	2	0	0	1	0	0	1	0	0	2	0	0	1	0	0.47	0	1	0	1.096	0.132	0.358	0.720279	NA	0	3.301	2.593	2.593	TRUE	0.3327	1.027	0.038	0.114	0.909323	NA	0	3.301	2.593	2.593	TRUE	0.3327
MD00G1174200	125	124	139	405	486	371	342	404	326	115	97	118	375	394	356	349	370	388	290.54	110	375	369	3.377	1.756	13.27	3.45948e-40	1.53576e-38	0.0043	0.014	0.0078	0.0078	TRUE	0.0936	3.317	1.73	12.968	1.86304e-38	8.28044e-37	0.0043	0.014	0.0078	0.0078	TRUE	0.0936
MD00G1174300	232	294	285	947	1144	908	796	943	730	214	231	242	878	928	872	813	864	868	624.4	229	893	848	3.881	1.956	21.259	2.69717e-100	7.08293e-98	0	0.0111	0.0038	0.0038	TRUE	0.0327	3.687	1.882	20.278	1.99928e-91	4.33449e-89	0	0.0111	0.0038	0.0038	TRUE	0.0327
MD00G1174400	804	936	789	375	446	347	714	749	615	740	734	669	348	362	333	729	687	731	465.95	714	348	716	0.492	-1.022	-11.309	1.17943e-29	3.09726e-28	0	0.012	0.0042	0.0042	TRUE	0.0502	1.001	0.002	0.019	0.984524	0.993529	0	0.012	0.0042	0.0042	TRUE	0.0502
MD00G1174500	34	27	28	49	44	54	19	13	22	31	21	24	45	36	52	19	12	26	26.31	25	44	19	1.533	0.617	2.527	0.0115012	0.0220142	0.024	0.0681	0.0462	0.0462	TRUE	0.1987	0.839	-0.254	-1.202	0.229262	0.318146	0.024	0.0681	0.0462	0.0462	TRUE	0.1987
MD00G1174600	24	26	39	569	616	542	216	236	218	22	20	33	527	500	521	221	216	259	273.51	25	516	232	20.337	4.346	23.874	5.6714e-126	2.43088e-123	0	0.0143	0.0063	0.0063	TRUE	0.2519	9.106	3.187	17.054	3.24398e-65	3.54745e-63	0	0.0143	0.0063	0.0063	TRUE	0.2519
MD00G1174800	0	0	0	0	0	0	0	0	0	0	0	0	0	0	0	0	0	0	0.08	0	0	0	1	0	0	1	NA	0	20.6719	12	12	TRUE	0.1097	1	0	0	1	NA	0	20.6719	12	12	TRUE	0.1097
MD00G1174900	0	0	0	0	0	0	0	0	0	0	0	0	0	0	0	0	0	0	1.18	0	0	0	1	0	0	1	1	0	1.33	1.8531	1.8531	TRUE	0.2256	1	0	0	1	1	0	1.33	1.8531	1.8531	TRUE	0.2256
MD00G1175000	0	0	0	0	0	0	0	0	0	0	0	0	0	0	0	0	0	0	1.59	0	0	0	1	0	0	1	1	0	0.9894	1.1264	1.1264	TRUE	0.0843	1	0	0	1	1	0	0.9894	1.1264	1.1264	TRUE	0.0843
MD00G1175100	0	0	0	0	0	0	0	0	0	0	0	0	0	0	0	0	0	0	0	0	0	0	1	0	NA	NA	NA	NA	NA	NA	NA	NA	NA	1	0	NA	NA	NA	NA	NA	NA	NA	NA	NA
MD00G1175200	0	0	0	0	0	0	0	0	0	0	0	0	0	0	0	0	0	0	0	0	0	0	1	0	NA	NA	NA	NA	NA	NA	NA	NA	NA	1	0	NA	NA	NA	NA	NA	NA	NA	NA	NA
MD00G1175300	1	1	1	0	0	0	0	2	0	1	1	1	0	0	0	0	2	0	2.05	1	0	1	0.643	-0.637	-1.433	0.151879	0.214107	0	0.7715	0.4583	0.4583	TRUE	0.4858	0.956	-0.065	-0.221	0.825278	0.872767	0	0.7715	0.4583	0.4583	TRUE	0.4858
MD00G1175400	113	128	140	1	2	4	8	8	17	104	100	119	1	2	4	8	7	20	60.64	108	2	12	0.022	-5.526	-9.4	5.4431e-21	8.48905e-20	0.0627	0.0344	0.0457	0.0457	TRUE	0.6207	0.111	-3.169	-8.901	5.5444e-19	8.7979e-18	0.0627	0.0344	0.0457	0.0457	TRUE	0.6207
MD00G1175500	825	931	836	0	0	1	0	0	1	759	730	709	0	0	1	0	0	1	237.28	733	0	0	0.001	-10.289	-9.424	4.34524e-21	6.82248e-20	0	0.0152	0.0091	0.0091	TRUE	0.2804	0.001	-10.093	-9.248	2.28366e-20	3.99042e-19	0	0.0152	0.0091	0.0091	TRUE	0.2804
MD00G1175600	0	0	1	0	0	0	0	0	0	0	0	1	0	0	0	0	0	0	0.22	0	0	0	0.948	-0.076	-0.2	0.841334	NA	0	7.0529	12	12	TRUE	0.4462	0.963	-0.055	-0.153	0.878409	NA	0	7.0529	12	12	TRUE	0.4462
MD00G1175700	0	0	0	0	0	0	0	0	0	0	0	0	0	0	0	0	0	0	0	0	0	0	1	0	NA	NA	NA	NA	NA	NA	NA	NA	NA	1	0	NA	NA	NA	NA	NA	NA	NA	NA	NA
MD00G1175800	0	0	0	0	1	0	0	3	1	0	0	0	0	1	0	0	3	1	0.4	0	0	1	1.086	0.119	0.308	0.757792	NA	0	3.9587	6.2166	6.2166	TRUE	0.0237	1.308	0.387	0.947	0.343486	NA	0	3.9587	6.2166	6.2166	TRUE	0.0237
MD00G1175900	0	0	0	0	0	0	0	0	0	0	0	0	0	0	0	0	0	0	0	0	0	0	1	0	NA	NA	NA	NA	NA	NA	NA	NA	NA	1	0	NA	NA	NA	NA	NA	NA	NA	NA	NA
MD00G1176000	0	0	0	0	0	0	0	1	0	0	0	0	0	0	0	0	1	0	0.15	0	0	0	1	0	0	1	NA	0	10.291	12	12	TRUE	0.1613	1.074	0.103	0.283	0.776832	NA	0	10.291	12	12	TRUE	0.1613
MD00G1176100	2	0	1	13	9	6	10	17	11	2	0	1	12	7	6	10	16	13	6.09	1	8	13	5.874	2.554	3.361	0.000775769	0.00189607	0	0.2654	0.1413	0.1413	TRUE	0.1955	10.942	3.452	4.05	5.12435e-05	0.000175696	0	0.2654	0.1413	0.1413	TRUE	0.1955
MD00G1176300	2016	2159	1941	2896	3429	2889	2141	2391	1618	1856	1694	1645	2684	2781	2775	2186	2192	1923	2138.03	1732	2747	2100	1.548	0.63	5.25	1.51822e-07	6.61073e-07	0.0111	0.0094	0.0112	0.0112	TRUE	0.2189	1.189	0.25	2.194	0.0282306	0.0532725	0.0111	0.0094	0.0112	0.0112	TRUE	0.2189
MD00G1176400	19	46	30	13	6	13	41	43	40	17	36	25	12	5	12	42	39	48	169.53	26	10	43	0.408	-1.294	-4.243	2.20535e-05	7.03246e-05	0.0335	0.0178	0.0241	0.0241	TRUE	0.43	1.433	0.519	2.544	0.0109607	0.0231154	0.0335	0.0178	0.0241	0.0241	TRUE	0.43
MD00G1176500	0	0	0	0	0	0	0	0	0	0	0	0	0	0	0	0	0	0	0	0	0	0	1	0	NA	NA	NA	NA	NA	NA	NA	NA	NA	1	0	NA	NA	NA	NA	NA	NA	NA	NA	NA
MD00G1176700	38	48	29	48	50	46	29	29	39	35	38	25	44	41	44	30	27	46	32.72	33	43	34	1.241	0.312	1.473	0.140679	0.200432	0	0.0564	0.0317	0.0317	TRUE	0.3037	1.026	0.037	0.199	0.842494	0.886498	0	0.0564	0.0317	0.0317	TRUE	0.3037
MD00G1176800	0	0	0	5	3	3	3	2	3	0	0	0	5	2	3	3	2	4	1.99	0	3	3	7.855	2.974	3.063	0.00219139	0.00489705	0	0.7945	0.3526	0.3526	TRUE	0.0969	5.794	2.535	2.844	0.00445382	0.0103311	0	0.7945	0.3526	0.3526	TRUE	0.0969
MD00G1176900	0	0	0	1	0	0	0	0	0	0	0	0	1	0	0	0	0	0	0.08	0	0	0	1.065	0.09	0.236	0.813237	NA	0	20.255	12	12	TRUE	0.2275	1	0	0	1	NA	0	20.255	12	12	TRUE	0.2275
MD00G1177000	0	0	0	1	4	1	0	0	0	0	0	0	1	3	1	0	0	0	0.63	0	2	0	1.821	0.865	1.622	0.104865	NA	0	2.508	2.0322	2.0322	TRUE	0.2962	1	0	0	1	NA	0	2.508	2.0322	2.0322	TRUE	0.2962
MD00G1177100	0	0	0	0	0	0	0	0	0	0	0	0	0	0	0	0	0	0	0	0	0	0	1	0	NA	NA	NA	NA	NA	NA	NA	NA	NA	1	0	NA	NA	NA	NA	NA	NA	NA	NA	NA
MD00G1177200	20	22	25	44	33	25	24	42	18	18	17	21	41	27	24	25	39	21	22.2	19	31	28	1.406	0.492	1.984	0.0472275	0.0773537	0	0.0791	0.0492	0.0492	TRUE	0.3604	1.289	0.367	1.661	0.0966895	0.154194	0	0.0791	0.0492	0.0492	TRUE	0.3604
MD00G1177300	766	855	895	1743	2283	1799	1296	1583	1056	705	671	759	1615	1852	1728	1323	1451	1255	1232.98	712	1732	1343	2.413	1.271	13.075	4.58197e-39	1.91764e-37	0.0048	0.0099	0.0061	0.0061	TRUE	0.0426	1.865	0.899	9.266	1.93346e-20	3.39128e-19	0.0048	0.0099	0.0061	0.0061	TRUE	0.0426
MD00G1177400	881	1025	931	700	740	668	571	595	520	811	804	789	649	600	642	583	545	618	676.7	801	630	582	0.791	-0.339	-4.542	5.56659e-06	1.94909e-05	0	0.0109	0.003	0.003	TRUE	0.0185	0.734	-0.447	-5.933	2.96804e-09	1.89355e-08	0	0.0109	0.003	0.003	TRUE	0.0185
MD00G1177600	0	0	0	0	0	0	0	0	0	0	0	0	0	0	0	0	0	0	0	0	0	0	1	0	NA	NA	NA	NA	NA	NA	NA	NA	NA	1	0	NA	NA	NA	NA	NA	NA	NA	NA	NA
MD00G1177700	0	0	0	0	0	0	0	0	0	0	0	0	0	0	0	0	0	0	0	0	0	0	1	0	NA	NA	NA	NA	NA	NA	NA	NA	NA	1	0	NA	NA	NA	NA	NA	NA	NA	NA	NA
MD00G1177800	0	0	0	0	1	0	0	0	0	0	0	0	0	1	0	0	0	0	0.19	0	0	0	1.065	0.09	0.236	0.813239	NA	0	8.2429	12	12	TRUE	0.32	1	0	0	1	NA	0	8.2429	12	12	TRUE	0.32
MD00G1178000	0	0	0	0	0	0	0	0	0	0	0	0	0	0	0	0	0	0	0	0	0	0	1	0	NA	NA	NA	NA	NA	NA	NA	NA	NA	1	0	NA	NA	NA	NA	NA	NA	NA	NA	NA
MD00G1178100	4	7	3	1	5	4	0	0	1	4	5	3	1	4	4	0	0	1	1.81	4	3	0	0.92	-0.12	-0.39	0.696203	0.761644	0	0.8721	0.5229	0.5229	TRUE	0.2629	0.364	-1.458	-2.26	0.023835	0.045907	0	0.8721	0.5229	0.5229	TRUE	0.2629
MD00G1178200	16	20	29	1	5	1	2	2	1	15	16	25	1	4	1	2	2	1	7.52	19	2	2	0.138	-2.855	-4.455	8.39862e-06	2.86222e-05	0	0.2166	0.1206	0.1206	TRUE	0.4726	0.117	-3.095	-4.353	1.34493e-05	5.09112e-05	0	0.2166	0.1206	0.1206	TRUE	0.4726
MD00G1178300	52	62	40	114	157	142	104	140	89	48	49	34	106	127	136	106	128	106	97.61	44	123	113	2.737	1.453	7.509	5.95073e-14	5.35609e-13	0.0082	0.0246	0.0154	0.0154	TRUE	0.1531	2.529	1.339	6.832	8.36063e-12	7.13265e-11	0.0082	0.0246	0.0154	0.0154	TRUE	0.1531
MD00G1178400	343	381	363	254	278	244	193	198	187	316	299	308	235	225	234	197	182	222	189.82	308	231	200	0.765	-0.386	-3.531	0.000413675	0.00106261	0	0.0169	0.0063	0.0063	TRUE	0.0476	0.667	-0.585	-5.221	1.77648e-07	8.97508e-07	0	0.0169	0.0063	0.0063	TRUE	0.0476
MD00G1178600	0	0	0	0	0	0	0	0	0	0	0	0	0	0	0	0	0	0	0	0	0	0	1	0	NA	NA	NA	NA	NA	NA	NA	NA	NA	1	0	NA	NA	NA	NA	NA	NA	NA	NA	NA
MD00G1178700	0	0	0	0	0	0	0	0	1	0	0	0	0	0	0	0	0	1	0.1	0	0	0	1	0	0	1	NA	0	15.793	12	12	TRUE	0.2804	1.074	0.103	0.283	0.77683	NA	0	15.793	12	12	TRUE	0.2804
MD00G1178800	0	0	0	0	0	0	0	1	0	0	0	0	0	0	0	0	1	0	0.08	0	0	0	1	0	0	1	NA	0	20.4757	12	12	TRUE	0.1613	1.074	0.103	0.283	0.77683	NA	0	20.4757	12	12	TRUE	0.1613
MD00G1178900	43	48	55	24	18	11	34	30	27	40	38	47	22	15	11	35	28	32	39.8	42	16	32	0.419	-1.253	-4.71	2.47773e-06	9.12538e-06	0	0.0479	0.0236	0.0236	TRUE	0.3004	0.824	-0.279	-1.501	0.133409	0.202208	0	0.0479	0.0236	0.0236	TRUE	0.3004
MD00G1179000	523	613	627	770	1075	812	609	675	504	481	481	531	714	872	780	622	619	599	694.69	498	789	613	1.564	0.645	7.175	7.22902e-13	5.8615e-12	0.0026	0.0109	0.0048	0.0048	TRUE	0.0521	1.217	0.283	3.182	0.00146476	0.00378497	0.0026	0.0109	0.0048	0.0048	TRUE	0.0521
MD00G1179100	213	260	314	71	93	87	86	112	88	196	204	266	66	75	84	88	103	105	133.97	222	75	99	0.357	-1.484	-6.034	1.60334e-09	9.00701e-09	0.0542	0.0203	0.0407	0.0407	TRUE	0.2564	0.477	-1.067	-4.557	5.19582e-06	2.10166e-05	0.0542	0.0203	0.0407	0.0407	TRUE	0.2564
MD00G1179200	446	480	555	169	178	149	184	206	142	411	377	470	157	144	143	188	189	169	291.91	419	148	182	0.358	-1.483	-12.039	2.22152e-33	6.97896e-32	0	0.014	0.0072	0.0072	TRUE	0.0672	0.441	-1.181	-9.711	2.703e-22	5.33306e-21	0	0.014	0.0072	0.0072	TRUE	0.0672
MD00G1179300	2162	2422	2179	1962	2391	2123	1810	2070	1489	1990	1900	1847	1818	1939	2039	1848	1898	1770	2078.73	1912	1932	1839	1.009	0.013	0.076	0.939496	0.962156	0.0382	0.0094	0.0278	0.0278	TRUE	0.1678	0.97	-0.044	-0.285	0.775397	0.832781	0.0382	0.0094	0.0278	0.0278	TRUE	0.1678
MD00G1179400	36	44	40	0	1	1	11	14	5	33	35	34	0	1	1	11	13	6	11.67	34	1	10	0.025	-5.326	-5.422	5.88032e-08	2.71434e-07	0	0.1426	0.0694	0.0694	TRUE	0.1761	0.35	-1.513	-4.039	5.37376e-05	0.000183304	0	0.1426	0.0694	0.0694	TRUE	0.1761
MD00G1179500	531	585	601	316	416	383	404	412	345	489	459	509	293	337	368	413	378	410	463.23	486	333	400	0.708	-0.498	-3.475	0.000510484	0.00129206	0.0173	0.012	0.0155	0.0155	TRUE	0.0738	0.848	-0.238	-1.786	0.0740848	0.122805	0.0173	0.012	0.0155	0.0155	TRUE	0.0738
MD00G1179600	0	0	0	1	0	0	0	0	0	0	0	0	1	0	0	0	0	0	0.08	0	0	0	1.065	0.09	0.236	0.813237	NA	0	20.255	12	12	TRUE	0.2275	1	0	0	1	NA	0	20.255	12	12	TRUE	0.2275
MD00G1179700	0	0	0	0	0	0	0	0	0	0	0	0	0	0	0	0	0	0	0	0	0	0	1	0	NA	NA	NA	NA	NA	NA	NA	NA	NA	1	0	NA	NA	NA	NA	NA	NA	NA	NA	NA
MD00G1179800	1	7	5	1	2	0	0	0	2	1	5	4	1	2	0	0	0	2	1.66	3	1	1	0.646	-0.63	-1.489	0.136573	0.195374	0	0.9498	0.7112	0.7112	TRUE	0.3733	0.628	-0.671	-1.578	0.114474	0.177894	0	0.9498	0.7112	0.7112	TRUE	0.3733
MD00G1179900	0	0	0	0	0	0	0	0	0	0	0	0	0	0	0	0	0	0	0	0	0	0	1	0	NA	NA	NA	NA	NA	NA	NA	NA	NA	1	0	NA	NA	NA	NA	NA	NA	NA	NA	NA
MD00G1180000	1	3	3	55	54	54	9	9	9	1	2	3	51	44	52	9	8	11	16.6	2	49	9	22.399	4.485	7.579	3.49528e-14	3.20874e-13	0	0.1028	0.0448	0.0448	TRUE	0.0911	3.403	1.767	3.383	0.000716696	0.00198276	0	0.1028	0.0448	0.0448	TRUE	0.0911
MD00G1180100	61	79	60	21	23	20	38	43	20	56	62	51	19	19	19	39	39	24	33.24	56	19	34	0.364	-1.458	-5.479	4.27929e-08	2.01061e-07	0	0.0557	0.0276	0.0276	TRUE	0.2068	0.682	-0.553	-2.706	0.00680854	0.0150829	0	0.0557	0.0276	0.0276	TRUE	0.2068
MD00G1180200	99	108	85	119	124	142	82	93	79	91	85	72	110	101	136	84	85	94	92.03	83	116	88	1.343	0.425	2.627	0.00862222	0.0170118	0.0082	0.0256	0.0154	0.0154	TRUE	0.134	1.046	0.065	0.434	0.664316	0.741775	0.0082	0.0256	0.0154	0.0154	TRUE	0.134
MD00G1180300	392	435	447	665	861	651	441	584	342	361	341	379	616	698	625	450	535	407	531.92	360	646	464	1.747	0.805	6.334	2.38546e-10	1.46764e-09	0.0107	0.0116	0.0109	0.0109	TRUE	0.1302	1.255	0.328	2.718	0.00657147	0.0146142	0.0107	0.0116	0.0109	0.0109	TRUE	0.1302
MD00G1181300	993	1099	1165	1207	1433	1131	1066	1279	995	914	862	987	1119	1162	1086	1089	1172	1183	956.1	921	1122	1148	1.192	0.254	1.703	0.0885284	0.133924	0.0243	0.0103	0.0194	0.0194	TRUE	0.2582	1.203	0.266	1.893	0.0582952	0.100038	0.0243	0.0103	0.0194	0.0194	TRUE	0.2582
MD00G1181400	276	310	271	37	49	39	65	68	64	254	243	230	34	40	37	66	62	76	149.72	242	37	68	0.156	-2.684	-15.392	1.84055e-53	1.37268e-51	0	0.0191	0.0084	0.0084	TRUE	0.0505	0.285	-1.812	-11.683	1.55657e-31	5.07381e-30	0	0.0191	0.0084	0.0084	TRUE	0.0505
MD00G1181500	0	0	0	0	0	0	0	0	0	0	0	0	0	0	0	0	0	0	0	0	0	0	1	0	NA	NA	NA	NA	NA	NA	NA	NA	NA	1	0	NA	NA	NA	NA	NA	NA	NA	NA	NA
MD00G1181600	0	0	0	0	0	0	0	0	0	0	0	0	0	0	0	0	0	0	0	0	0	0	1	0	NA	NA	NA	NA	NA	NA	NA	NA	NA	1	0	NA	NA	NA	NA	NA	NA	NA	NA	NA
MD00G1181700	0	0	0	0	0	0	0	1	0	0	0	0	0	0	0	0	1	0	0.08	0	0	0	1	0	0	1	NA	0	20.4757	12	12	TRUE	0.1613	1.074	0.103	0.283	0.77683	NA	0	20.4757	12	12	TRUE	0.1613
MD00G1181800	340	398	369	372	379	332	419	466	370	313	312	313	345	307	319	428	427	440	448.12	313	324	432	1.033	0.047	0.544	0.586604	0.66593	0	0.0121	0.003	0.003	TRUE	0.0185	1.36	0.444	5.271	1.35997e-07	6.97475e-07	0	0.0121	0.003	0.003	TRUE	0.0185
MD00G1182100	111	166	94	62	75	72	49	52	31	102	130	80	57	61	69	50	48	37	55.66	104	62	45	0.647	-0.628	-3.165	0.00155289	0.00357475	0	0.0367	0.028	0.028	TRUE	0.048	0.461	-1.116	-4.914	8.91295e-07	4.05767e-06	0	0.0367	0.028	0.028	TRUE	0.048
MD00G1182200	79	92	99	18	25	20	24	29	30	73	72	84	17	20	19	25	27	36	45.41	76	19	29	0.257	-1.961	-7.852	4.08177e-15	4.06541e-14	0	0.0431	0.0184	0.0184	TRUE	0.1152	0.395	-1.342	-5.853	4.83216e-09	2.99819e-08	0	0.0431	0.0184	0.0184	TRUE	0.1152
MD00G1182300	30	45	36	18	16	17	10	16	20	28	35	31	17	13	16	10	15	24	20.43	31	15	16	0.59	-0.761	-2.666	0.00767133	0.0152992	0.0427	0.0851	0.0647	0.0647	TRUE	0.1941	0.633	-0.659	-2.459	0.0139326	0.0285701	0.0427	0.0851	0.0647	0.0647	TRUE	0.1941
MD00G1182400	0	0	0	0	0	0	0	1	0	0	0	0	0	0	0	0	1	0	0.08	0	0	0	1	0	0	1	NA	0	20.4757	12	12	TRUE	0.1613	1.074	0.103	0.283	0.77683	NA	0	20.4757	12	12	TRUE	0.1613
MD00G1182600	3	1	0	0	0	0	1	0	0	3	1	0	0	0	0	1	0	0	0.38	1	0	0	0.778	-0.362	-0.855	0.392278	NA	0	4.1168	6.5468	6.5468	TRUE	0.0654	0.879	-0.186	-0.502	0.615426	NA	0	4.1168	6.5468	6.5468	TRUE	0.0654
MD00G1182800	2	0	0	0	1	0	1	0	0	2	0	0	0	1	0	1	0	0	0.84	1	0	0	0.901	-0.15	-0.419	0.675035	0.744053	0	1.8765	1.4016	1.4016	TRUE	0.4875	0.931	-0.104	-0.319	0.74949	0.812669	0	1.8765	1.4016	1.4016	TRUE	0.4875
MD00G1183000	30	27	34	206	252	187	184	227	193	28	21	29	191	204	180	188	208	229	324.88	26	192	208	7.278	2.864	11.492	1.43927e-30	3.94635e-29	0.035	0.0134	0.0269	0.0269	TRUE	0.0147	7.923	2.986	11.947	6.76126e-33	2.34319e-31	0.035	0.0134	0.0269	0.0269	TRUE	0.0147
MD00G1183100	0	0	0	1	0	2	5	2	3	0	0	0	1	0	2	5	2	4	2.77	0	1	4	1.684	0.752	1.592	0.11149	0.163867	0	0.5731	0.345	0.345	TRUE	0.1873	8.432	3.076	3.108	0.00188531	0.00476278	0	0.5731	0.345	0.345	TRUE	0.1873
MD00G1183300	0	0	0	0	0	0	1	0	0	0	0	0	0	0	0	1	0	0	0.09	0	0	0	1	0	0	1	NA	0	18.3825	12	12	TRUE	0.2059	1.074	0.103	0.283	0.77683	NA	0	18.3825	12	12	TRUE	0.2059
MD00G1183400	217	275	248	242	333	278	234	290	203	200	216	210	224	270	267	239	266	241	217.76	209	254	249	1.203	0.266	2.389	0.0168747	0.0310223	0	0.0158	0.0063	0.0063	TRUE	0.0575	1.173	0.23	2.12	0.0340446	0.0627482	0	0.0158	0.0063	0.0063	TRUE	0.0575
MD00G1184000	0	0	0	0	0	0	0	0	2	0	0	0	0	0	0	0	0	2	0.58	0	0	1	1	0	0	1	NA	0	2.7149	3.1504	3.1504	TRUE	0.4876	1.266	0.341	0.881	0.378389	NA	0	2.7149	3.1504	3.1504	TRUE	0.4876
MD00G1184100	0	0	0	0	0	0	0	0	0	0	0	0	0	0	0	0	0	0	0	0	0	0	1	0	NA	NA	NA	NA	NA	NA	NA	NA	NA	1	0	NA	NA	NA	NA	NA	NA	NA	NA	NA
MD00G1184200	507	624	569	788	1011	777	544	681	411	467	489	482	730	820	746	556	624	489	489.34	479	765	556	1.57	0.65	6.429	1.28336e-10	8.12366e-10	0.0041	0.0118	0.0065	0.0065	TRUE	0.0684	1.148	0.199	2.022	0.0431989	0.0772348	0.0041	0.0118	0.0065	0.0065	TRUE	0.0684
MD00G1184300	1539	1841	1888	1280	1693	1307	1203	1382	1084	1417	1444	1600	1186	1373	1256	1228	1267	1289	1339.49	1487	1272	1261	0.864	-0.21	-1.799	0.0719798	0.111834	0.0113	0.0098	0.0107	0.0107	TRUE	0.2412	0.863	-0.213	-1.891	0.0585903	0.100472	0.0113	0.0098	0.0107	0.0107	TRUE	0.2412
MD00G1184400	0	0	0	0	0	0	0	0	0	0	0	0	0	0	0	0	0	0	0	0	0	0	1	0	NA	NA	NA	NA	NA	NA	NA	NA	NA	1	0	NA	NA	NA	NA	NA	NA	NA	NA	NA
MD00G1184500	0	0	0	0	0	0	0	0	0	0	0	0	0	0	0	0	0	0	0	0	0	0	1	0	NA	NA	NA	NA	NA	NA	NA	NA	NA	1	0	NA	NA	NA	NA	NA	NA	NA	NA	NA
MD00G1184900	60	62	73	64	46	53	44	45	46	55	49	62	59	37	51	45	41	55	48.25	55	49	47	0.91	-0.136	-0.7	0.483672	0.570457	0.015	0.041	0.027	0.027	TRUE	0.1997	0.889	-0.17	-0.957	0.338412	0.437005	0.015	0.041	0.027	0.027	TRUE	0.1997
MD00G1185200	469	533	484	862	987	790	578	652	488	432	418	410	799	800	759	590	598	580	498.08	420	786	589	1.85	0.888	10.111	4.91919e-24	9.53908e-23	0	0.0118	0.0042	0.0042	TRUE	0.0946	1.382	0.467	5.33	9.83737e-08	5.13487e-07	0	0.0118	0.0042	0.0042	TRUE	0.0946
MD00G1185300	1	1	3	0	0	0	0	0	0	1	1	3	0	0	0	0	0	0	0.35	2	0	0	0.751	-0.412	-0.951	0.341442	NA	0	4.426	6.3564	6.3564	TRUE	0.1861	0.781	-0.356	-0.887	0.374812	NA	0	4.426	6.3564	6.3564	TRUE	0.1861
MD00G1185400	747	839	785	626	773	674	591	614	425	688	658	665	580	627	647	604	563	505	519.25	670	618	557	0.927	-0.109	-0.946	0.34392	0.430106	0.0083	0.0116	0.0096	0.0096	TRUE	0.2366	0.848	-0.238	-2.131	0.0330487	0.0611759	0.0083	0.0116	0.0096	0.0096	TRUE	0.2366
MD00G1185500	69	116	96	152	211	145	102	107	86	64	91	81	141	171	139	104	98	102	118.74	79	150	101	1.828	0.87	5.386	7.21765e-08	3.29473e-07	0.0075	0.0218	0.0133	0.0133	TRUE	0.129	1.228	0.297	1.99	0.0466251	0.0824982	0.0075	0.0218	0.0133	0.0133	TRUE	0.129
MD00G1185600	4	3	3	3	6	2	1	1	3	4	2	3	3	5	2	1	1	4	2.52	3	3	2	1.043	0.06	0.202	0.840241	0.882261	0	0.6296	0.3188	0.3188	TRUE	0.2867	0.878	-0.187	-0.674	0.500038	0.596551	0	0.6296	0.3188	0.3188	TRUE	0.2867
MD00G1185700	69	87	52	141	159	130	109	121	76	64	68	44	131	129	125	111	111	90	89.2	59	128	104	2.093	1.065	6.033	1.60855e-09	9.0349e-09	0.0024	0.0262	0.0144	0.0144	TRUE	0.2136	1.68	0.749	4.338	1.43942e-05	5.42237e-05	0.0024	0.0262	0.0144	0.0144	TRUE	0.2136
MD00G1185800	0	0	3	0	1	0	1	1	1	0	0	3	0	1	0	1	1	1	0.54	1	0	1	0.857	-0.222	-0.586	0.557996	NA	0	2.904	2.6145	2.6145	TRUE	0.7211	1.03	0.043	0.131	0.896043	NA	0	2.904	2.6145	2.6145	TRUE	0.7211
MD00G1185900	0	0	0	0	0	0	0	0	0	0	0	0	0	0	0	0	0	0	0	0	0	0	1	0	NA	NA	NA	NA	NA	NA	NA	NA	NA	1	0	NA	NA	NA	NA	NA	NA	NA	NA	NA
MD00G1186000	1	1	0	1	0	2	2	5	7	1	1	0	1	0	2	2	5	8	7.22	1	1	5	1.117	0.16	0.486	0.626631	0.70125	0	0.2253	0.137	0.137	TRUE	0.2217	3.485	1.801	2.648	0.00810471	0.0176494	0	0.2253	0.137	0.137	TRUE	0.2217
MD00G1186100	8	7	2	4	7	4	2	5	2	7	5	2	4	6	4	2	5	2	3.96	5	5	3	0.968	-0.046	-0.161	0.872103	0.908164	0	0.4035	0.2148	0.2148	TRUE	0.2083	0.861	-0.217	-0.815	0.415202	0.515032	0	0.4035	0.2148	0.2148	TRUE	0.2083
MD00G1186200	8	18	13	29	28	28	24	25	20	7	14	11	27	23	27	25	23	24	16.64	11	26	24	1.952	0.965	3.223	0.0012685	0.00296923	0	0.1026	0.0462	0.0462	TRUE	0.2099	1.781	0.832	2.897	0.00376324	0.00889582	0	0.1026	0.0462	0.0462	TRUE	0.2099
MD00G1186300	0	0	0	0	0	0	0	0	0	0	0	0	0	0	0	0	0	0	0	0	0	0	1	0	NA	NA	NA	NA	NA	NA	NA	NA	NA	1	0	NA	NA	NA	NA	NA	NA	NA	NA	NA
MD00G1186400	1	1	0	0	0	0	0	1	0	1	1	0	0	0	0	0	1	0	0.22	1	0	0	0.883	-0.179	-0.455	0.649229	NA	0	7.1654	9.32	9.32	TRUE	0.1613	0.962	-0.057	-0.156	0.875772	NA	0	7.1654	9.32	9.32	TRUE	0.1613
MD00G1186500	0	3	0	6	18	11	28	19	11	0	2	0	6	15	11	29	17	13	8.03	1	11	20	7.768	2.958	3.587	0.000334732	0.000875389	0.1542	0.2033	0.1847	0.1847	TRUE	0.4988	17.549	4.133	4.571	4.84664e-06	1.96854e-05	0.1542	0.2033	0.1847	0.1847	TRUE	0.4988
MD00G1186600	8	7	6	4	5	5	4	8	6	7	5	5	4	4	5	4	7	7	4.8	6	4	6	0.855	-0.225	-0.775	0.438315	0.525826	0	0.3343	0.1339	0.1339	TRUE	0.2014	1.014	0.02	0.085	0.932277	0.954468	0	0.3343	0.1339	0.1339	TRUE	0.2014
MD00G1186700	0	2	2	2	1	3	7	6	6	0	2	2	2	1	3	7	6	7	3.7	1	2	7	1.153	0.205	0.646	0.51851	0.603629	0	0.4307	0.1915	0.1915	TRUE	0.1915	2.951	1.561	2.687	0.00720742	0.0158835	0	0.4307	0.1915	0.1915	TRUE	0.1915
MD00G1186800	0	0	0	0	0	0	0	0	0	0	0	0	0	0	0	0	0	0	0	0	0	0	1	0	NA	NA	NA	NA	NA	NA	NA	NA	NA	1	0	NA	NA	NA	NA	NA	NA	NA	NA	NA
MD00G1186900	235	290	269	118	126	100	123	124	90	216	227	228	109	102	96	126	114	107	241.24	224	102	116	0.48	-1.058	-5.772	7.82139e-09	4.03068e-08	0.0243	0.0151	0.0212	0.0212	TRUE	0.1037	0.544	-0.878	-4.881	1.05338e-06	4.74516e-06	0.0243	0.0151	0.0212	0.0212	TRUE	0.1037
MD00G1187000	0	0	0	0	0	1	0	0	1	0	0	0	0	0	1	0	0	1	0.61	0	0	0	1.12	0.163	0.441	0.659221	NA	0	2.5914	2.0181	2.0181	TRUE	0.2804	1.136	0.184	0.529	0.596741	NA	0	2.5914	2.0181	2.0181	TRUE	0.2804
MD00G1187100	0	0	0	0	0	1	0	0	0	0	0	0	0	0	1	0	0	0	0.08	0	0	0	1.065	0.09	0.236	0.813237	NA	0	19.5408	12	12	TRUE	0.2449	1	0	0	1	NA	0	19.5408	12	12	TRUE	0.2449
MD00G1187200	8	10	7	21	19	22	27	22	23	7	8	6	19	15	21	28	20	27	72.94	7	18	25	2.224	1.153	3.602	0.00031538	0.000829082	0	0.0301	0.0237	0.0237	TRUE	0.0138	3.166	1.663	4.765	1.89071e-06	8.21062e-06	0	0.0301	0.0237	0.0237	TRUE	0.0138
MD00G1187300	82	80	83	2	5	3	95	127	114	75	63	70	2	4	3	97	116	136	78.5	69	3	116	0.046	-4.45	-9.22	2.97601e-20	4.42662e-19	0	0.0285	0.0186	0.0186	TRUE	0.078	1.56	0.642	3.685	0.000228477	0.000696866	0	0.0285	0.0186	0.0186	TRUE	0.078
MD00G1187400	0	0	0	0	0	0	0	0	0	0	0	0	0	0	0	0	0	0	0	0	0	0	1	0	NA	NA	NA	NA	NA	NA	NA	NA	NA	1	0	NA	NA	NA	NA	NA	NA	NA	NA	NA
MD00G1187500	110	102	122	57	73	83	63	87	66	101	80	103	53	59	80	64	80	78	75.59	95	64	74	0.711	-0.492	-2.778	0.00546427	0.0112502	0.0111	0.0293	0.0189	0.0189	TRUE	0.2018	0.826	-0.277	-1.717	0.0860062	0.139576	0.0111	0.0293	0.0189	0.0189	TRUE	0.2018
MD00G1187600	0	0	0	1	0	1	0	0	0	0	0	0	1	0	1	0	0	0	0.16	0	1	0	1.132	0.179	0.459	0.646244	NA	0	9.9501	12	12	TRUE	0.1433	1	0	0	1	NA	0	9.9501	12	12	TRUE	0.1433
MD00G1187700	0	0	0	0	0	0	0	0	0	0	0	0	0	0	0	0	0	0	0	0	0	0	1	0	NA	NA	NA	NA	NA	NA	NA	NA	NA	1	0	NA	NA	NA	NA	NA	NA	NA	NA	NA
MD00G1187800	3	2	1	8	9	6	1	1	4	3	2	1	7	7	6	1	1	5	3.32	2	7	2	2.041	1.03	2.217	0.0266389	0.0466521	0	0.4799	0.2741	0.2741	TRUE	0.4043	1.058	0.081	0.304	0.760837	0.821556	0	0.4799	0.2741	0.2741	TRUE	0.4043
MD00G1188000	0	0	0	0	0	0	0	0	0	0	0	0	0	0	0	0	0	0	0	0	0	0	1	0	NA	NA	NA	NA	NA	NA	NA	NA	NA	1	0	NA	NA	NA	NA	NA	NA	NA	NA	NA
MD00G1188100	0	0	0	0	0	0	0	0	0	0	0	0	0	0	0	0	0	0	0	0	0	0	1	0	NA	NA	NA	NA	NA	NA	NA	NA	NA	1	0	NA	NA	NA	NA	NA	NA	NA	NA	NA
MD00G1188200	3	1	1	0	0	0	0	2	0	3	1	1	0	0	0	0	2	0	1.03	2	0	1	0.524	-0.933	-1.743	0.0814007	0.124469	0	1.5195	1.0319	1.0319	TRUE	0.4861	0.862	-0.214	-0.665	0.506297	0.602342	0	1.5195	1.0319	1.0319	TRUE	0.4861
MD00G1188300	0	1	0	1	2	0	0	0	0	0	1	0	1	2	0	0	0	0	0.43	0	1	0	1.158	0.212	0.546	0.584757	NA	0	3.6524	3.8905	3.8905	TRUE	0.1452	0.944	-0.083	-0.236	0.813548	NA	0	3.6524	3.8905	3.8905	TRUE	0.1452
MD00G1188400	8	4	7	2	4	4	9	1	5	7	3	6	2	3	4	9	1	6	4.98	5	3	5	0.796	-0.329	-1.03	0.30297	0.386763	0.2468	0.3229	0.2825	0.2825	TRUE	0.1765	0.99	-0.014	-0.056	0.955583	0.972668	0.2468	0.3229	0.2825	0.2825	TRUE	0.1765
MD00G1188500	0	0	0	0	0	0	0	0	0	0	0	0	0	0	0	0	0	0	0	0	0	0	1	0	NA	NA	NA	NA	NA	NA	NA	NA	NA	1	0	NA	NA	NA	NA	NA	NA	NA	NA	NA
MD00G1188600	64	69	68	51	59	48	52	58	47	59	54	58	47	48	46	53	53	56	48.86	57	47	54	0.854	-0.229	-1.319	0.187211	0.25638	0	0.0406	0.0134	0.0134	TRUE	0.0179	0.961	-0.057	-0.361	0.717997	0.78671	0	0.0406	0.0134	0.0134	TRUE	0.0179
MD00G1188700	60	62	59	47	33	42	5	7	9	55	49	50	44	27	40	5	6	11	29.17	51	37	7	0.771	-0.374	-1.773	0.0762688	0.117572	0	0.0622	0.0328	0.0328	TRUE	0.2403	0.15	-2.737	-7.148	8.80256e-13	8.2828e-12	0	0.0622	0.0328	0.0328	TRUE	0.2403
MD00G1188900	3	6	2	0	0	0	0	0	0	3	5	2	0	0	0	0	0	0	0.76	3	0	0	0.485	-1.045	-1.764	0.0776625	0.119444	0	2.0562	2.9683	2.9683	TRUE	0.0275	0.535	-0.903	-1.677	0.0934893	0.149906	0	2.0562	2.9683	2.9683	TRUE	0.0275
MD00G1189000	670	756	658	1015	1202	1056	514	579	412	617	593	558	941	975	1014	525	531	490	583.83	589	977	515	1.635	0.709	7.735	1.03507e-14	9.98387e-14	0.0017	0.0113	0.0052	0.0052	TRUE	0.1242	0.884	-0.178	-1.953	0.0508266	0.0888781	0.0017	0.0113	0.0052	0.0052	TRUE	0.1242
MD00G1189100	8	12	12	6	6	11	11	13	11	7	9	10	6	5	11	11	12	13	16.94	9	7	12	0.86	-0.217	-0.82	0.412419	0.500557	0	0.1009	0.0486	0.0486	TRUE	0.2677	1.159	0.213	0.95	0.341895	0.440713	0	0.1009	0.0486	0.0486	TRUE	0.2677
MD00G1189200	276	348	324	374	401	381	309	331	238	254	273	275	347	325	366	316	303	283	293.44	267	346	301	1.273	0.348	3.071	0.00213457	0.00477808	0.0041	0.014	0.0076	0.0076	TRUE	0.1388	1.112	0.153	1.387	0.165452	0.242529	0.0041	0.014	0.0076	0.0076	TRUE	0.1388
MD00G1189300	183	262	186	74	97	68	62	77	38	168	206	158	69	79	65	63	71	45	112.93	177	71	60	0.414	-1.274	-7.318	2.51044e-13	2.12037e-12	0.0092	0.0225	0.0148	0.0148	TRUE	0.1703	0.349	-1.519	-8.24	1.71952e-16	2.25065e-15	0.0092	0.0225	0.0148	0.0148	TRUE	0.1703
MD00G1189400	42	48	29	110	115	113	58	80	63	39	38	25	102	93	109	59	73	75	70.79	34	101	69	2.895	1.534	7.324	2.40436e-13	2.03215e-12	0	0.0307	0.0168	0.0168	TRUE	0.208	1.924	0.944	4.589	4.45438e-06	1.82032e-05	0	0.0307	0.0168	0.0168	TRUE	0.208
MD00G1189500	0	0	0	0	0	0	0	0	0	0	0	0	0	0	0	0	0	0	0	0	0	0	1	0	NA	NA	NA	NA	NA	NA	NA	NA	NA	1	0	NA	NA	NA	NA	NA	NA	NA	NA	NA
MD00G1189600	717	860	666	619	598	615	439	467	341	660	675	564	574	485	591	448	428	405	506.57	633	550	427	0.882	-0.181	-1.217	0.22353	0.298782	0.0217	0.0117	0.0188	0.0188	TRUE	0.1841	0.71	-0.493	-3.348	0.000815371	0.00222945	0.0217	0.0117	0.0188	0.0188	TRUE	0.1841
MD00G1189900	0	0	0	17	12	18	1	7	1	0	0	0	16	10	17	1	6	1	4.8	0	14	3	50.626	5.662	4.796	1.621e-06	6.1405e-06	0.1893	0.3345	0.2958	0.2958	TRUE	0.81	6.91	2.789	2.983	0.00285197	0.00692518	0.1893	0.3345	0.2958	0.2958	TRUE	0.81
MD00G1190000	0	0	0	0	0	0	0	0	0	0	0	0	0	0	0	0	0	0	0	0	0	0	1	0	NA	NA	NA	NA	NA	NA	NA	NA	NA	1	0	NA	NA	NA	NA	NA	NA	NA	NA	NA
MD00G1190200	0	0	0	0	0	0	0	0	0	0	0	0	0	0	0	0	0	0	0	0	0	0	1	0	NA	NA	NA	NA	NA	NA	NA	NA	NA	1	0	NA	NA	NA	NA	NA	NA	NA	NA	NA
MD00G1190500	2	2	3	2	2	1	0	5	0	2	2	3	2	2	1	0	5	0	2.31	2	2	2	0.925	-0.112	-0.358	0.720161	0.782004	0.17	0.6848	0.4501	0.4501	TRUE	1.1666	0.956	-0.064	-0.236	0.813798	0.863921	0.17	0.6848	0.4501	0.4501	TRUE	1.1666
MD00G1190600	0	0	0	0	0	0	0	0	0	0	0	0	0	0	0	0	0	0	0	0	0	0	1	0	NA	NA	NA	NA	NA	NA	NA	NA	NA	1	0	NA	NA	NA	NA	NA	NA	NA	NA	NA
MD00G1190700	13	13	12	2	5	1	1	1	1	12	10	10	2	4	1	1	1	1	14.8	11	2	1	0.299	-1.74	-3.492	0.000478973	0.00121793	0	0.1143	0.0525	0.0525	TRUE	0.2946	0.138	-2.86	-3.732	0.000190216	0.000589132	0	0.1143	0.0525	0.0525	TRUE	0.2946
MD00G1190800	19	25	20	63	49	48	50	59	37	17	20	17	58	40	46	51	54	44	32.28	18	48	50	2.437	1.285	4.855	1.20321e-06	4.64806e-06	0	0.0571	0.0278	0.0278	TRUE	0.128	2.567	1.36	5.012	5.38507e-07	2.53836e-06	0	0.0571	0.0278	0.0278	TRUE	0.128
MD00G1190900	0	0	0	0	0	0	0	0	0	0	0	0	0	0	0	0	0	0	0	0	0	0	1	0	NA	NA	NA	NA	NA	NA	NA	NA	NA	1	0	NA	NA	NA	NA	NA	NA	NA	NA	NA
MD00G1191000	0	0	0	0	0	0	0	0	0	0	0	0	0	0	0	0	0	0	0	0	0	0	1	0	NA	NA	NA	NA	NA	NA	NA	NA	NA	1	0	NA	NA	NA	NA	NA	NA	NA	NA	NA
MD00G1191600	415	538	372	883	1149	895	914	955	640	382	422	315	818	932	860	933	875	761	655.8	373	870	856	2.292	1.197	9.639	5.47333e-22	9.16894e-21	0.0094	0.011	0.0099	0.0099	TRUE	0.1073	2.262	1.178	9.43	4.11812e-21	7.52769e-20	0.0094	0.011	0.0099	0.0099	TRUE	0.1073
MD00G1191700	0	0	0	0	0	0	0	0	0	0	0	0	0	0	0	0	0	0	0	0	0	0	1	0	NA	NA	NA	NA	NA	NA	NA	NA	NA	1	0	NA	NA	NA	NA	NA	NA	NA	NA	NA
MD00G1191800	1622	1749	1751	1135	1467	1104	1441	1496	1201	1493	1372	1484	1052	1190	1061	1472	1371	1428	1315.76	1450	1101	1424	0.767	-0.382	-4.259	2.04917e-05	6.57377e-05	0.0039	0.0098	0.0055	0.0055	TRUE	0.0719	0.983	-0.024	-0.283	0.777381	0.834427	0.0039	0.0098	0.0055	0.0055	TRUE	0.0719
MD00G1191900	0	0	0	5	4	6	11	7	6	0	0	0	5	3	6	11	6	7	3.83	0	5	8	14.563	3.864	3.6	0.000318353	0.000836072	0	0.4173	0.2101	0.2101	TRUE	0.1531	30.359	4.924	4.307	1.65158e-05	6.15507e-05	0	0.4173	0.2101	0.2101	TRUE	0.1531
MD00G1192000	0	0	0	7	11	2	7	11	14	0	0	0	6	9	2	7	10	17	4.54	0	6	11	19.543	4.289	3.814	0.000136803	0.000383735	0	0.353	0.2761	0.2761	TRUE	0.1009	40.284	5.332	4.552	5.32301e-06	2.15078e-05	0	0.353	0.2761	0.2761	TRUE	0.1009
MD00G1192100	0	0	0	2	3	0	2	5	10	0	0	0	2	2	0	2	5	12	2.17	0	1	6	2.191	1.132	1.951	0.0510807	0.0828678	0	0.728	0.6601	0.6601	TRUE	0.0632	14.941	3.901	3.398	0.000680028	0.00188931	0	0.728	0.6601	0.6601	TRUE	0.0632
MD00G1192300	0	0	0	0	0	0	0	0	0	0	0	0	0	0	0	0	0	0	0	0	0	0	1	0	NA	NA	NA	NA	NA	NA	NA	NA	NA	1	0	NA	NA	NA	NA	NA	NA	NA	NA	NA
MD00G1192400	120	131	106	94	132	105	246	269	244	110	103	90	87	107	101	251	247	290	256.75	101	98	263	0.979	-0.031	-0.193	0.846943	0.887822	0.0166	0.0147	0.016	0.016	TRUE	0.0209	2.533	1.341	7.851	4.13598e-15	4.84089e-14	0.0166	0.0147	0.016	0.016	TRUE	0.0209
MD00G1192500	1	0	0	0	1	0	3	4	4	1	0	0	0	1	0	3	4	5	1.48	0	0	4	1.01	0.015	0.043	0.965874	0.981616	0	1.0643	0.4878	0.4878	TRUE	0.2511	3.344	1.742	2.429	0.0151344	0.030742	0	1.0643	0.4878	0.4878	TRUE	0.2511
MD00G1192600	0	0	0	0	0	0	0	0	0	0	0	0	0	0	0	0	0	0	0	0	0	0	1	0	NA	NA	NA	NA	NA	NA	NA	NA	NA	1	0	NA	NA	NA	NA	NA	NA	NA	NA	NA
MD00G1192700	67	82	78	46	57	46	38	48	51	62	64	66	43	46	44	39	44	61	41.58	64	44	48	0.737	-0.44	-2.311	0.0208344	0.0374978	0	0.0462	0.0211	0.0211	TRUE	0.1944	0.796	-0.329	-1.876	0.0606545	0.103487	0	0.0462	0.0211	0.0211	TRUE	0.1944
MD00G1192800	12	14	18	22	33	22	26	37	30	11	11	15	20	27	21	27	34	36	70.15	12	23	32	1.624	0.7	2.874	0.00405436	0.00857556	0	0.0309	0.0143	0.0143	TRUE	0.0898	2.359	1.238	4.555	5.24934e-06	2.12216e-05	0	0.0309	0.0143	0.0143	TRUE	0.0898
MD00G1192900	11	18	12	22	31	22	46	74	45	10	14	10	20	25	21	47	68	53	88.11	11	22	56	1.682	0.751	2.949	0.00318385	0.00688098	0	0.0264	0.0179	0.0179	TRUE	0.0697	4.659	2.22	7.683	1.54966e-14	1.72756e-13	0	0.0264	0.0179	0.0179	TRUE	0.0697
MD00G1193000	18	21	29	14	7	11	0	3	1	17	16	25	13	6	11	0	3	1	12.91	19	10	1	0.66	-0.6	-1.942	0.0521128	0.0843001	0.1095	0.1297	0.1195	0.1195	TRUE	0.1825	0.09	-3.479	-4.493	7.03793e-06	2.78899e-05	0.1095	0.1297	0.1195	0.1195	TRUE	0.1825
MD00G1193100	19	28	24	70	93	67	55	34	47	17	22	20	65	75	64	56	31	56	42.22	20	68	48	3.213	1.684	6.207	5.39305e-10	3.19217e-09	0	0.0457	0.031	0.031	TRUE	0.4068	2.148	1.103	4.197	2.70555e-05	9.74311e-05	0	0.0457	0.031	0.031	TRUE	0.4068
MD00G1193200	0	0	0	0	0	0	0	0	0	0	0	0	0	0	0	0	0	0	0	0	0	0	1	0	NA	NA	NA	NA	NA	NA	NA	NA	NA	1	0	NA	NA	NA	NA	NA	NA	NA	NA	NA
MD00G1199400	8	16	16	13	8	11	10	11	4	7	13	14	12	6	11	10	10	5	12.94	11	10	8	0.916	-0.127	-0.492	0.622646	0.697733	0	0.1295	0.0663	0.0663	TRUE	0.179	0.876	-0.191	-0.839	0.401694	0.501959	0	0.1295	0.0663	0.0663	TRUE	0.179
MD00G1199500	0	0	0	0	0	0	0	0	0	0	0	0	0	0	0	0	0	0	0	0	0	0	1	0	NA	NA	NA	NA	NA	NA	NA	NA	NA	1	0	NA	NA	NA	NA	NA	NA	NA	NA	NA
MD00G1199600	1860	2196	1829	1192	1097	1141	1188	1162	974	1712	1723	1550	1105	890	1096	1213	1065	1158	1324.69	1662	1030	1145	0.641	-0.641	-4.6	4.21748e-06	1.50095e-05	0.0177	0.0098	0.0155	0.0155	TRUE	0.133	0.718	-0.478	-3.577	0.000347793	0.00102483	0.0177	0.0098	0.0155	0.0155	TRUE	0.133
MD00G1199800	0	0	0	0	0	0	0	0	0	0	0	0	0	0	0	0	0	0	0	0	0	0	1	0	NA	NA	NA	NA	NA	NA	NA	NA	NA	1	0	NA	NA	NA	NA	NA	NA	NA	NA	NA
MD00G1199900	0	0	2	0	0	0	0	0	0	0	0	2	0	0	0	0	0	0	0.14	1	0	0	0.897	-0.158	-0.407	0.684292	NA	0	11.078	12	12	TRUE	0.487	0.913	-0.131	-0.359	0.719603	NA	0	11.078	12	12	TRUE	0.487
MD00G1200000	2	4	2	0	1	0	0	0	0	2	3	2	0	1	0	0	0	0	0.62	2	0	0	0.674	-0.57	-1.255	0.20944	NA	0	2.5154	2.3809	2.3809	TRUE	0.1698	0.572	-0.805	-1.594	0.111004	NA	0	2.5154	2.3809	2.3809	TRUE	0.1698
MD00G1200100	0	2	0	0	1	2	0	2	2	0	2	0	0	1	2	0	2	2	1.04	1	1	1	1.099	0.136	0.391	0.695827	0.7613	0	1.5068	1.2087	1.2087	TRUE	0.2711	1.189	0.249	0.745	0.456279	0.555236	0	1.5068	1.2087	1.2087	TRUE	0.2711
MD00G1200200	113	134	130	125	168	111	132	174	139	104	105	110	116	136	107	135	160	165	108.55	106	120	153	1.112	0.153	1.055	0.291524	0.374485	0	0.023	0.0114	0.0114	TRUE	0.1109	1.373	0.457	3.242	0.00118892	0.0031372	0	0.023	0.0114	0.0114	TRUE	0.1109
MD00G1200300	4248	4719	4051	4679	4459	4551	3487	3802	2621	3910	3702	3433	4336	3616	4372	3561	3485	3116	2804.13	3682	4108	3387	1.109	0.149	1.431	0.152332	0.214656	0.0081	0.0092	0.0085	0.0085	TRUE	0.4341	0.927	-0.109	-1.085	0.278045	0.372625	0.0081	0.0092	0.0085	0.0085	TRUE	0.4341
MD00G1200700	0	0	0	0	0	0	0	0	0	0	0	0	0	0	0	0	0	0	0	0	0	0	1	0	NA	NA	NA	NA	NA	NA	NA	NA	NA	1	0	NA	NA	NA	NA	NA	NA	NA	NA	NA
MD00G1200800	0	0	0	0	0	0	0	0	0	0	0	0	0	0	0	0	0	0	0	0	0	0	1	0	NA	NA	NA	NA	NA	NA	NA	NA	NA	1	0	NA	NA	NA	NA	NA	NA	NA	NA	NA
MD00G1200900	0	0	0	1	0	1	0	0	1	0	0	0	1	0	1	0	0	1	0.38	0	1	0	1.215	0.281	0.699	0.484861	NA	0	4.1381	4.1339	4.1339	TRUE	0.32	1.113	0.154	0.428	0.668486	NA	0	4.1381	4.1339	4.1339	TRUE	0.32
MD00G1201000	199	202	234	192	231	194	105	163	109	183	158	198	178	187	186	107	149	130	161.72	180	184	129	1.02	0.028	0.19	0.849668	0.890104	0.0146	0.0183	0.0161	0.0161	TRUE	0.2001	0.755	-0.406	-2.718	0.0065637	0.0145995	0.0146	0.0183	0.0161	0.0161	TRUE	0.2001
MD00G1201200	6	2	4	10	13	9	0	0	0	6	2	3	9	11	9	0	0	0	3.87	4	10	0	1.647	0.72	1.894	0.0581726	0.0928421	0	0.4129	0.2601	0.2601	TRUE	0.2595	0.145	-2.789	-3.013	0.00258471	0.00634021	0	0.4129	0.2601	0.2601	TRUE	0.2595
MD00G1201300	19	11	17	23	41	25	0	1	0	17	9	14	21	33	24	0	1	0	12.9	13	26	0	1.57	0.651	2.212	0.0269413	0.0471242	0	0.1298	0.09	0.09	TRUE	0.4058	0.045	-4.462	-4.148	3.35395e-05	0.000118538	0	0.1298	0.09	0.09	TRUE	0.4058
MD00G1201500	0	0	0	0	0	0	1	0	0	0	0	0	0	0	0	1	0	0	0.16	0	0	0	1	0	0	1	NA	0	9.7343	12	12	TRUE	0.2059	1.074	0.103	0.283	0.776832	NA	0	9.7343	12	12	TRUE	0.2059
MD00G1201600	962	1090	1068	1056	1196	1058	1194	1408	1064	886	855	905	979	970	1016	1219	1291	1265	1448.35	882	988	1258	1.118	0.161	2.418	0.0156054	0.0289357	0	0.0097	0.0024	0.0024	TRUE	0.0119	1.415	0.5	7.605	2.85037e-14	3.1152e-13	0	0.0097	0.0024	0.0024	TRUE	0.0119
MD00G1201700	3	1	3	0	0	0	0	0	0	3	1	3	0	0	0	0	0	0	1.21	2	0	0	0.385	-1.378	-2.119	0.03411	0.0581152	0	1.3037	0.8792	0.8792	TRUE	0.0292	0.447	-1.163	-1.997	0.0458667	0.0813227	0	1.3037	0.8792	0.8792	TRUE	0.0292
MD00G1201800	0	0	0	0	0	1	0	0	0	0	0	0	0	0	1	0	0	0	3.94	0	0	0	1.154	0.207	0.586	0.558122	0.640164	0	0.4058	0.2784	0.2784	TRUE	0.2449	1	0	0	1	1	0	0.4058	0.2784	0.2784	TRUE	0.2449
MD00G1201900	0	0	0	0	0	0	0	0	0	0	0	0	0	0	0	0	0	0	0	0	0	0	1	0	NA	NA	NA	NA	NA	NA	NA	NA	NA	1	0	NA	NA	NA	NA	NA	NA	NA	NA	NA
MD00G1202000	0	0	0	0	0	0	0	0	0	0	0	0	0	0	0	0	0	0	0	0	0	0	1	0	NA	NA	NA	NA	NA	NA	NA	NA	NA	1	0	NA	NA	NA	NA	NA	NA	NA	NA	NA
MD00G1202100	0	0	0	0	0	0	0	0	0	0	0	0	0	0	0	0	0	0	0.08	0	0	0	1	0	0	1	NA	0	20.6719	12	12	TRUE	0.1097	1	0	0	1	NA	0	20.6719	12	12	TRUE	0.1097
MD00G1202300	6	5	6	1	3	4	1	6	3	6	4	5	1	2	4	1	6	4	4.1	5	2	4	0.777	-0.364	-1.098	0.272199	0.353288	0.2626	0.3904	0.3382	0.3382	TRUE	0.2173	0.902	-0.149	-0.568	0.570281	0.660202	0.2626	0.3904	0.3382	0.3382	TRUE	0.2173
MD00G1202400	6	5	5	2	7	3	3	5	3	6	4	4	2	6	3	3	5	4	3.55	5	4	4	0.917	-0.125	-0.417	0.676785	0.745585	0.2171	0.4493	0.35	0.35	TRUE	1.7815	0.947	-0.079	-0.307	0.758802	0.819976	0.2171	0.4493	0.35	0.35	TRUE	1.7815
MD00G1202500	0	0	0	0	0	0	0	0	1	0	0	0	0	0	0	0	0	1	0.22	0	0	0	1	0	0	1	NA	0	7.0722	12	12	TRUE	0.32	1.074	0.103	0.283	0.776832	NA	0	7.0722	12	12	TRUE	0.32
MD00G1202600	15	12	20	20	16	10	16	18	11	14	9	17	19	13	10	16	17	13	11.39	13	14	15	1.015	0.022	0.084	0.932811	0.957091	0.0188	0.1459	0.0922	0.0922	TRUE	0.6894	1.069	0.096	0.436	0.662825	0.740423	0.0188	0.1459	0.0922	0.0922	TRUE	0.6894
MD00G1202900	96	124	117	25	28	25	0	5	3	88	97	99	23	23	24	0	5	4	33.09	95	23	3	0.258	-1.957	-7.283	3.27597e-13	2.74766e-12	0	0.0559	0.0322	0.0322	TRUE	0.5951	0.032	-4.985	-9.16	5.19449e-20	8.82875e-19	0	0.0559	0.0322	0.0322	TRUE	0.5951
MD00G1203100	1	1	0	1	3	2	0	2	0	1	1	0	1	2	2	0	2	0	0.96	1	2	1	1.291	0.368	0.969	0.33257	0.418151	0	1.634	1.0718	1.0718	TRUE	0.7173	1.024	0.035	0.112	0.911073	0.938506	0	1.634	1.0718	1.0718	TRUE	0.7173
MD00G1203200	0	0	0	0	2	1	0	1	0	0	0	0	0	2	1	0	1	0	0.41	0	1	0	1.3	0.379	0.901	0.367336	NA	0	3.7861	3.9097	3.9097	TRUE	0.1785	1.114	0.156	0.436	0.662637	NA	0	3.7861	3.9097	3.9097	TRUE	0.1785
MD00G1203300	0	0	0	0	0	0	0	0	0	0	0	0	0	0	0	0	0	0	0	0	0	0	1	0	NA	NA	NA	NA	NA	NA	NA	NA	NA	1	0	NA	NA	NA	NA	NA	NA	NA	NA	NA
MD00G1203400	4	3	0	5	3	3	5	3	6	4	2	0	5	2	3	5	3	7	4.02	2	3	5	1.188	0.248	0.789	0.430269	0.51814	0	0.3973	0.2678	0.2678	TRUE	0.2702	1.384	0.469	1.446	0.148251	0.220981	0	0.3973	0.2678	0.2678	TRUE	0.2702
MD00G1203500	50	60	59	61	76	83	81	78	73	46	47	50	57	62	80	83	72	87	65.95	48	66	81	1.276	0.352	1.611	0.107192	0.158218	0.0532	0.0323	0.0445	0.0445	TRUE	0.9543	1.477	0.563	2.599	0.0093551	0.020072	0.0532	0.0323	0.0445	0.0445	TRUE	0.9543
MD00G1203600	25	35	45	52	65	50	27	39	29	23	27	38	48	53	48	28	36	34	38.91	29	50	33	1.539	0.622	2.976	0.00292003	0.0063588	0	0.0488	0.0221	0.0221	TRUE	0.2273	1.067	0.094	0.517	0.604807	0.690293	0	0.0488	0.0221	0.0221	TRUE	0.2273
MD00G1203700	14	17	15	16	26	16	9	10	19	13	13	13	15	21	15	9	9	23	14.62	13	17	14	1.179	0.237	0.911	0.362338	0.449342	0.048	0.1155	0.0824	0.0824	TRUE	0.6079	1.013	0.019	0.087	0.93075	0.953403	0.048	0.1155	0.0824	0.0824	TRUE	0.6079
MD00G1203800	45	51	30	14	9	8	2	5	1	41	40	25	13	7	8	2	5	1	15.89	35	9	3	0.314	-1.671	-4.041	5.31932e-05	0.000159657	0.1045	0.107	0.1057	0.1057	TRUE	0.3901	0.086	-3.535	-5.681	1.3388e-08	7.88316e-08	0.1045	0.107	0.1057	0.1057	TRUE	0.3901
MD00G1204100	416	481	460	259	293	267	330	439	329	383	377	390	240	238	256	337	402	391	710.72	383	245	377	0.651	-0.619	-5.584	2.34978e-08	1.14391e-07	0.0052	0.0108	0.0068	0.0068	TRUE	0.0755	0.985	-0.022	-0.216	0.828935	0.875839	0.0052	0.0108	0.0068	0.0068	TRUE	0.0755
MD00G1204200	0	0	0	0	0	0	0	0	0	0	0	0	0	0	0	0	0	0	0	0	0	0	1	0	NA	NA	NA	NA	NA	NA	NA	NA	NA	1	0	NA	NA	NA	NA	NA	NA	NA	NA	NA
MD00G1204500	2	2	0	0	0	0	0	0	0	2	2	0	0	0	0	0	0	0	0.28	1	0	0	0.836	-0.259	-0.646	0.518203	NA	0	5.511	12	12	TRUE	0.2386	0.856	-0.225	-0.598	0.549956	NA	0	5.511	12	12	TRUE	0.2386
MD00G1204600	30	45	31	206	231	191	196	209	168	28	35	26	191	187	183	200	192	200	149.44	30	187	197	6.184	2.629	14.791	1.68398e-49	1.0902e-47	0	0.0191	0.0065	0.0065	TRUE	0.1052	6.512	2.703	15.122	1.15335e-51	8.48292e-50	0	0.0191	0.0065	0.0065	TRUE	0.1052
MD00G1204700	2349	2445	2707	2164	2753	2106	2311	2857	2460	2162	1918	2294	2005	2233	2023	2360	2619	2924	2746.94	2125	2087	2634	0.984	-0.023	-0.183	0.85483	0.89428	0.0158	0.0092	0.0137	0.0137	TRUE	0.2511	1.208	0.272	2.218	0.0265289	0.0504468	0.0158	0.0092	0.0137	0.0137	TRUE	0.2511
MD00G1204900	0	0	0	0	0	0	0	0	0	0	0	0	0	0	0	0	0	0	0	0	0	0	1	0	NA	NA	NA	NA	NA	NA	NA	NA	NA	1	0	NA	NA	NA	NA	NA	NA	NA	NA	NA
MD00G1205000	3	5	5	0	0	0	0	0	0	3	4	4	0	0	0	0	0	0	0.91	4	0	0	0.374	-1.419	-2.059	0.0395405	0.0662532	0	1.7266	2.2733	2.2733	TRUE	0.0449	0.427	-1.229	-1.963	0.0496928	0.0871733	0	1.7266	2.2733	2.2733	TRUE	0.0449
MD00G1205100	0	0	0	0	0	0	0	0	0	0	0	0	0	0	0	0	0	0	0	0	0	0	1	0	NA	NA	NA	NA	NA	NA	NA	NA	NA	1	0	NA	NA	NA	NA	NA	NA	NA	NA	NA
MD00G1205200	0	0	0	0	0	0	0	0	0	0	0	0	0	0	0	0	0	0	0	0	0	0	1	0	NA	NA	NA	NA	NA	NA	NA	NA	NA	1	0	NA	NA	NA	NA	NA	NA	NA	NA	NA
MD00G1205500	0	0	0	0	0	0	0	0	1	0	0	0	0	0	0	0	0	1	0.1	0	0	0	1	0	0	1	NA	0	15.793	12	12	TRUE	0.2804	1.074	0.103	0.283	0.77683	NA	0	15.793	12	12	TRUE	0.2804
MD00G1205700	165	159	183	168	227	169	159	208	145	152	125	155	156	184	162	162	191	172	142.94	144	167	175	1.139	0.188	1.111	0.266663	0.347267	0.0253	0.0196	0.0228	0.0228	TRUE	0.7452	1.168	0.225	1.432	0.152218	0.226036	0.0253	0.0196	0.0228	0.0228	TRUE	0.7452
MD00G1205900	0	0	0	0	0	0	0	0	0	0	0	0	0	0	0	0	0	0	0	0	0	0	1	0	NA	NA	NA	NA	NA	NA	NA	NA	NA	1	0	NA	NA	NA	NA	NA	NA	NA	NA	NA
MD00G1206000	0	0	0	0	1	0	0	0	0	0	0	0	0	1	0	0	0	0	0.07	0	0	0	1.065	0.09	0.236	0.813237	NA	0	23.1429	12	12	TRUE	0.1698	1	0	0	1	NA	0	23.1429	12	12	TRUE	0.1698
MD00G1206300	0	0	0	0	0	0	0	0	0	0	0	0	0	0	0	0	0	0	0	0	0	0	1	0	NA	NA	NA	NA	NA	NA	NA	NA	NA	1	0	NA	NA	NA	NA	NA	NA	NA	NA	NA
MD00G1206400	13	26	26	11	23	16	21	23	23	12	20	22	10	19	15	21	21	27	23.31	18	15	23	0.873	-0.196	-0.816	0.414779	0.502819	0	0.0757	0.0433	0.0433	TRUE	0.226	1.15	0.202	0.976	0.329057	0.427352	0	0.0757	0.0433	0.0433	TRUE	0.226
MD00G1206500	1	2	1	0	0	0	0	0	1	1	2	1	0	0	0	0	0	1	0.7	1	0	0	0.681	-0.555	-1.231	0.218289	NA	2.2378	2.2579	2.2376	2.2376	TRUE	0.7216	0.84	-0.252	-0.709	0.478326	NA	2.2378	2.2579	2.2376	2.2376	TRUE	0.7216
MD00G1206600	0	0	0	0	0	0	0	0	0	0	0	0	0	0	0	0	0	0	0	0	0	0	1	0	NA	NA	NA	NA	NA	NA	NA	NA	NA	1	0	NA	NA	NA	NA	NA	NA	NA	NA	NA
MD00G1206700	0	1	0	0	0	0	0	0	0	0	1	0	0	0	0	0	0	0	0.07	0	0	0	0.948	-0.076	-0.2	0.841337	NA	0	23.9269	12	12	TRUE	0.1785	0.963	-0.055	-0.153	0.878411	NA	0	23.9269	12	12	TRUE	0.1785
MD00G1206800	12	9	14	16	32	17	25	21	12	11	7	12	15	26	16	26	19	14	15.11	10	19	20	1.562	0.643	2.221	0.0263358	0.0461647	0	0.1121	0.0655	0.0655	TRUE	0.1282	1.561	0.643	2.304	0.0212087	0.0414546	0	0.1121	0.0655	0.0655	TRUE	0.1282
MD00G1206900	0	0	1	0	0	0	0	0	0	0	0	1	0	0	0	0	0	0	0.07	0	0	0	0.948	-0.076	-0.2	0.841337	NA	0	22.1474	12	12	TRUE	0.2117	0.963	-0.055	-0.153	0.878411	NA	0	22.1474	12	12	TRUE	0.2117
MD00G1207000	30	28	48	49	39	41	63	36	38	28	22	41	45	32	39	64	33	45	36.11	30	39	47	1.199	0.262	1.156	0.247651	0.326045	0.0424	0.0519	0.0464	0.0464	TRUE	0.1077	1.369	0.453	2.088	0.0368108	0.0672089	0.0424	0.0519	0.0464	0.0464	TRUE	0.1077
MD00G1207100	0	1	0	0	0	0	0	0	0	0	1	0	0	0	0	0	0	0	0.07	0	0	0	0.948	-0.076	-0.2	0.841337	NA	0	23.9269	12	12	TRUE	0.1785	0.963	-0.055	-0.153	0.878411	NA	0	23.9269	12	12	TRUE	0.1785
MD00G1207200	0	0	0	0	0	0	0	0	0	0	0	0	0	0	0	0	0	0	0	0	0	0	1	0	NA	NA	NA	NA	NA	NA	NA	NA	NA	1	0	NA	NA	NA	NA	NA	NA	NA	NA	NA
MD00G1207300	134	174	182	179	176	169	186	217	134	123	136	154	166	143	162	190	199	159	185.31	138	157	183	1.122	0.166	1.264	0.206378	0.278743	0.0038	0.0171	0.009	0.009	TRUE	0.0627	1.284	0.361	2.845	0.00444073	0.0103059	0.0038	0.0171	0.009	0.009	TRUE	0.0627
MD00G1207400	0	4	1	43	61	43	5	3	3	0	3	1	40	49	41	5	3	4	12.47	1	43	4	26.799	4.744	6.759	1.39391e-11	9.81104e-11	0	0.134	0.0754	0.0754	TRUE	0.5512	1.5	0.585	1.696	0.0898655	0.144805	0	0.134	0.0754	0.0754	TRUE	0.5512
MD00G1207500	0	0	0	0	0	0	0	0	0	0	0	0	0	0	0	0	0	0	0	0	0	0	1	0	NA	NA	NA	NA	NA	NA	NA	NA	NA	1	0	NA	NA	NA	NA	NA	NA	NA	NA	NA
MD00G1207600	0	0	0	0	0	0	0	0	0	0	0	0	0	0	0	0	0	0	0.08	0	0	0	1	0	0	1	NA	0	20.6719	12	12	TRUE	0.1097	1	0	0	1	NA	0	20.6719	12	12	TRUE	0.1097
MD00G1207700	0	1	0	0	0	0	0	0	0	0	1	0	0	0	0	0	0	0	0.07	0	0	0	0.948	-0.076	-0.2	0.841337	NA	0	23.9269	12	12	TRUE	0.1785	0.963	-0.055	-0.153	0.878411	NA	0	23.9269	12	12	TRUE	0.1785
MD00G1207800	5	5	11	19	23	16	1	2	1	5	4	9	18	19	15	1	2	1	6.32	6	17	1	2.083	1.059	2.744	0.00606902	0.0123709	0	0.2558	0.1285	0.1285	TRUE	0.3331	0.457	-1.13	-2.366	0.0179686	0.0358067	0	0.2558	0.1285	0.1285	TRUE	0.3331
MD00G1208000	0	0	0	0	0	0	0	0	1	0	0	0	0	0	0	0	0	1	0.1	0	0	0	1	0	0	1	NA	0	15.793	12	12	TRUE	0.2804	1.074	0.103	0.283	0.77683	NA	0	15.793	12	12	TRUE	0.2804
MD00G1208200	3	5	10	4	8	9	0	0	0	3	4	8	4	6	9	0	0	0	4.03	5	6	0	1.088	0.122	0.42	0.674564	0.743656	0	0.3965	0.232	0.232	TRUE	0.1688	0.077	-3.703	-3.502	0.000461079	0.0013281	0	0.3965	0.232	0.232	TRUE	0.1688
MD00G1208300	75	75	87	176	213	166	113	111	113	69	59	74	163	173	159	115	102	134	89.68	67	165	117	2.389	1.256	7.449	9.39312e-14	8.2904e-13	0	0.0261	0.0129	0.0129	TRUE	0.1393	1.646	0.719	4.398	1.09456e-05	4.20134e-05	0	0.0261	0.0129	0.0129	TRUE	0.1393
MD00G1208400	43	48	40	47	43	30	76	72	89	40	38	34	44	35	29	78	66	106	59.87	37	36	83	0.974	-0.038	-0.186	0.852268	0.892191	0.0213	0.0347	0.027	0.027	TRUE	0.1458	2.078	1.055	4.646	3.38631e-06	1.41153e-05	0.0213	0.0347	0.027	0.027	TRUE	0.1458
MD00G1208500	10	22	14	16	30	11	26	34	45	9	17	12	15	24	11	27	31	53	25.79	13	17	37	1.17	0.227	0.881	0.378128	0.465775	0.0774	0.0692	0.0738	0.0738	TRUE	0.4957	2.422	1.276	3.697	0.000217943	0.000667359	0.0774	0.0692	0.0738	0.0738	TRUE	0.4957
MD00G1208600	171	260	224	262	297	264	267	262	279	157	204	190	243	241	254	273	240	332	288.86	184	246	282	1.301	0.38	2.775	0.00552396	0.0113636	0.0111	0.014	0.0121	0.0121	TRUE	0.1317	1.462	0.548	4.047	5.18905e-05	0.000177702	0.0111	0.014	0.0121	0.0121	TRUE	0.1317
MD00G1208700	0	0	0	0	0	0	0	0	0	0	0	0	0	0	0	0	0	0	0	0	0	0	1	0	NA	NA	NA	NA	NA	NA	NA	NA	NA	1	0	NA	NA	NA	NA	NA	NA	NA	NA	NA
MD00G1214100	529	604	495	443	448	372	420	469	346	487	474	420	411	363	357	429	430	411	580.63	460	377	423	0.834	-0.263	-1.992	0.0463295	0.0760667	0.0135	0.0113	0.0128	0.0128	TRUE	0.1615	0.931	-0.103	-0.827	0.408114	0.508198	0.0135	0.0113	0.0128	0.0128	TRUE	0.1615
MD00G1214200	729	836	819	851	970	828	678	706	629	671	656	694	789	787	795	692	647	748	591.45	674	790	696	1.166	0.221	2.437	0.0147909	0.0275707	0.0014	0.0113	0.0052	0.0052	TRUE	0.1282	1.029	0.042	0.466	0.640913	0.721923	0.0014	0.0113	0.0052	0.0052	TRUE	0.1282
MD00G1214300	1	3	0	2	6	4	2	3	0	1	2	0	2	5	4	2	3	0	2.16	1	4	2	1.503	0.588	1.498	0.134037	0.192136	0	0.7324	0.3845	0.3845	TRUE	0.3443	1.098	0.135	0.478	0.632705	0.71487	0	0.7324	0.3845	0.3845	TRUE	0.3443
MD00G1214400	4	0	1	0	0	0	0	0	0	4	0	1	0	0	0	0	0	0	0.38	2	0	0	0.798	-0.326	-0.787	0.431182	NA	12	4.1509	10.5445	10.5445	TRUE	0.0472	0.821	-0.285	-0.736	0.461841	NA	12	4.1509	10.5445	10.5445	TRUE	0.0472
MD00G1214500	114	129	137	100	90	84	46	41	47	105	101	116	93	73	81	47	38	56	68.27	107	82	47	0.791	-0.338	-2.047	0.0406921	0.0678748	0.0019	0.0315	0.0167	0.0167	TRUE	0.1291	0.451	-1.148	-5.768	8.0417e-09	4.86573e-08	0.0019	0.0315	0.0167	0.0167	TRUE	0.1291
MD00G1214600	0	0	0	0	0	0	0	0	0	0	0	0	0	0	0	0	0	0	0	0	0	0	1	0	NA	NA	NA	NA	NA	NA	NA	NA	NA	1	0	NA	NA	NA	NA	NA	NA	NA	NA	NA
MD00G1214800	568	623	608	697	835	704	593	704	479	523	489	515	646	677	676	606	645	569	561.01	509	666	607	1.299	0.377	4.409	1.0394e-05	3.49276e-05	0.0011	0.0114	0.0041	0.0041	TRUE	0.0355	1.183	0.242	2.856	0.00428486	0.00997642	0.0011	0.0114	0.0041	0.0041	TRUE	0.0355
MD00G1214900	0	0	0	0	0	0	0	0	0	0	0	0	0	0	0	0	0	0	0	0	0	0	1	0	NA	NA	NA	NA	NA	NA	NA	NA	NA	1	0	NA	NA	NA	NA	NA	NA	NA	NA	NA
MD00G1215000	0	0	0	0	0	0	0	0	0	0	0	0	0	0	0	0	0	0	0	0	0	0	1	0	NA	NA	NA	NA	NA	NA	NA	NA	NA	1	0	NA	NA	NA	NA	NA	NA	NA	NA	NA
MD00G1215200	0	0	0	0	0	0	0	0	0	0	0	0	0	0	0	0	0	0	0	0	0	0	1	0	NA	NA	NA	NA	NA	NA	NA	NA	NA	1	0	NA	NA	NA	NA	NA	NA	NA	NA	NA
MD00G1215300	0	0	0	0	0	0	0	0	0	0	0	0	0	0	0	0	0	0	0	0	0	0	1	0	NA	NA	NA	NA	NA	NA	NA	NA	NA	1	0	NA	NA	NA	NA	NA	NA	NA	NA	NA
MD00G1215500	0	0	0	0	0	0	0	0	0	0	0	0	0	0	0	0	0	0	0	0	0	0	1	0	NA	NA	NA	NA	NA	NA	NA	NA	NA	1	0	NA	NA	NA	NA	NA	NA	NA	NA	NA
MD00G1215600	0	0	0	3	3	0	2	2	0	0	0	0	3	2	0	2	2	0	0.83	0	2	1	1.903	0.928	1.694	0.0902033	0.136176	0	1.8854	1.7932	1.7932	TRUE	0.3087	1.599	0.677	1.463	0.143377	0.21478	0	1.8854	1.7932	1.7932	TRUE	0.3087
MD00G1215700	23	26	28	18	15	7	15	22	14	21	20	24	17	12	7	15	20	17	13.84	22	12	17	0.661	-0.597	-2.157	0.0310077	0.0533633	0	0.1216	0.0603	0.0603	TRUE	0.1456	0.886	-0.174	-0.818	0.413296	0.513299	0	0.1216	0.0603	0.0603	TRUE	0.1456
MD00G1215800	81	99	98	68	41	53	63	33	50	75	78	83	63	33	51	64	30	59	51.22	79	49	51	0.695	-0.524	-2.28	0.0226107	0.0403577	0.0587	0.0392	0.05	0.05	TRUE	0.2962	0.741	-0.433	-2.058	0.0395909	0.0715977	0.0587	0.0392	0.05	0.05	TRUE	0.2962
MD00G1219900	0	0	0	0	0	0	0	0	0	0	0	0	0	0	0	0	0	0	0	0	0	0	1	0	NA	NA	NA	NA	NA	NA	NA	NA	NA	1	0	NA	NA	NA	NA	NA	NA	NA	NA	NA
MD00G1220000	1	9	7	17	11	11	10	9	6	1	7	6	16	9	11	10	8	7	17.37	5	12	8	1.79	0.84	2.406	0.0161122	0.02976	0.0652	0.0986	0.0826	0.0826	TRUE	0.1516	1.325	0.405	1.499	0.133966	0.202909	0.0652	0.0986	0.0826	0.0826	TRUE	0.1516
MD00G1220200	0	1	1	0	1	0	0	1	0	0	1	1	0	1	0	0	1	0	0.28	1	0	0	0.936	-0.096	-0.251	0.801553	NA	0	5.5932	5.0329	5.0329	TRUE	0.1698	0.956	-0.065	-0.184	0.85429	NA	0	5.5932	5.0329	5.0329	TRUE	0.1698
MD00G1220300	0	1	1	1	3	3	2	5	4	0	1	1	1	2	3	2	5	5	17.24	1	2	4	1.578	0.658	1.582	0.113687	0.166682	0	0.0993	0.0602	0.0602	TRUE	0.0855	2.624	1.392	2.393	0.0167137	0.0335878	0	0.0993	0.0602	0.0602	TRUE	0.0855
MD00G1220400	235	283	227	182	226	173	142	156	124	216	222	192	169	183	166	145	143	147	141.21	210	173	145	0.834	-0.262	-2.191	0.0284334	0.0494812	0	0.0197	0.0073	0.0073	TRUE	0.0674	0.713	-0.488	-4.002	6.26997e-05	0.000211342	0	0.0197	0.0073	0.0073	TRUE	0.0674
MD00G1220500	0	0	0	0	0	0	0	0	0	0	0	0	0	0	0	0	0	0	0	0	0	0	1	0	NA	NA	NA	NA	NA	NA	NA	NA	NA	1	0	NA	NA	NA	NA	NA	NA	NA	NA	NA
MD00G1220600	277	318	287	247	234	193	241	288	260	255	249	243	229	190	185	246	264	309	615.98	249	201	273	0.817	-0.291	-2.662	0.0077576	0.0154522	0.002	0.0112	0.0057	0.0057	TRUE	0.0773	1.084	0.116	1.12	0.262618	0.355566	0.002	0.0112	0.0057	0.0057	TRUE	0.0773
MD00G1220700	0	0	0	0	0	0	0	0	0	0	0	0	0	0	0	0	0	0	0	0	0	0	1	0	NA	NA	NA	NA	NA	NA	NA	NA	NA	1	0	NA	NA	NA	NA	NA	NA	NA	NA	NA
MD00G1220800	27	29	35	29	42	31	21	51	24	25	23	30	27	34	30	21	47	29	29.61	26	30	32	1.12	0.163	0.712	0.476689	0.563363	0.0369	0.0614	0.0479	0.0479	TRUE	0.3323	1.153	0.205	1.012	0.311643	0.408893	0.0369	0.0614	0.0479	0.0479	TRUE	0.3323
MD00G1220900	300	340	315	229	308	232	223	203	178	276	267	267	212	250	223	228	186	212	208.68	270	228	209	0.861	-0.216	-1.535	0.124786	0.180674	0.0127	0.0161	0.0141	0.0141	TRUE	0.4192	0.801	-0.321	-2.357	0.0184051	0.0365885	0.0127	0.0161	0.0141	0.0141	TRUE	0.4192
MD00G1221000	675	749	750	767	683	670	607	663	460	621	588	636	711	554	644	620	608	547	578.08	615	636	592	1.032	0.045	0.436	0.662761	0.732868	0.0057	0.0113	0.0074	0.0074	TRUE	0.0773	0.966	-0.049	-0.487	0.626128	0.708964	0.0057	0.0113	0.0074	0.0074	TRUE	0.0773
MD00G1221100	0	0	0	0	0	0	0	0	0	0	0	0	0	0	0	0	0	0	0	0	0	0	1	0	NA	NA	NA	NA	NA	NA	NA	NA	NA	1	0	NA	NA	NA	NA	NA	NA	NA	NA	NA
MD00G1221200	0	1	0	0	0	0	0	0	0	0	1	0	0	0	0	0	0	0	0.07	0	0	0	0.948	-0.076	-0.2	0.841337	NA	0	23.9269	12	12	TRUE	0.1785	0.963	-0.055	-0.153	0.878411	NA	0	23.9269	12	12	TRUE	0.1785
MD00G1221400	2125	2699	2064	3533	4218	3202	3597	3882	2635	1956	2117	1749	3274	3421	3076	3673	3559	3132	2862.44	1941	3257	3455	1.656	0.728	8.249	1.59354e-16	1.78394e-15	0.0042	0.0092	0.0055	0.0055	TRUE	0.0453	1.758	0.814	9.181	4.25643e-20	7.26417e-19	0.0042	0.0092	0.0055	0.0055	TRUE	0.0453
MD00G1221500	0	0	0	0	0	0	0	0	0	0	0	0	0	0	0	0	0	0	0	0	0	0	1	0	NA	NA	NA	NA	NA	NA	NA	NA	NA	1	0	NA	NA	NA	NA	NA	NA	NA	NA	NA
MD00G1221600	0	0	0	0	0	0	0	0	0	0	0	0	0	0	0	0	0	0	0	0	0	0	1	0	NA	NA	NA	NA	NA	NA	NA	NA	NA	1	0	NA	NA	NA	NA	NA	NA	NA	NA	NA
MD00G1221700	0	0	0	0	0	0	0	0	0	0	0	0	0	0	0	0	0	0	0	0	0	0	1	0	NA	NA	NA	NA	NA	NA	NA	NA	NA	1	0	NA	NA	NA	NA	NA	NA	NA	NA	NA
MD00G1221800	0	0	1	0	0	0	0	0	0	0	0	1	0	0	0	0	0	0	0.07	0	0	0	0.948	-0.076	-0.2	0.841337	NA	0	22.1474	12	12	TRUE	0.2117	0.963	-0.055	-0.153	0.878411	NA	0	22.1474	12	12	TRUE	0.2117
MD00G1221900	3	1	2	0	0	0	0	1	0	3	1	2	0	0	0	0	1	0	0.64	2	0	0	0.549	-0.865	-1.629	0.103357	NA	0	2.4692	1.8866	1.8866	TRUE	0.1838	0.751	-0.414	-1.068	0.285708	NA	0	2.4692	1.8866	1.8866	TRUE	0.1838
MD01G1000100	0	0	0	0	0	0	0	0	0	0	0	0	0	0	0	0	0	0	0	0	0	0	1	0	NA	NA	NA	NA	NA	NA	NA	NA	NA	1	0	NA	NA	NA	NA	NA	NA	NA	NA	NA
MD01G1000200	9	13	6	3	15	6	5	2	3	8	10	5	3	12	6	5	2	4	67.14	8	7	4	0.943	-0.085	-0.326	0.744744	0.8029	0.0793	0.0319	0.0465	0.0465	TRUE	0.2138	0.639	-0.646	-2.03	0.0423497	0.0758913	0.0793	0.0319	0.0465	0.0465	TRUE	0.2138
MD01G1000300	102	130	104	297	295	271	225	279	219	94	102	88	275	239	260	230	256	260	250.93	95	258	249	2.634	1.397	7.413	1.23798e-13	1.07659e-12	0.0245	0.0149	0.0212	0.0212	TRUE	0.0498	2.542	1.346	7.087	1.36766e-12	1.2574e-11	0.0245	0.0149	0.0212	0.0212	TRUE	0.0498
MD01G1000900	0	0	0	0	0	0	0	0	0	0	0	0	0	0	0	0	0	0	0	0	0	0	1	0	NA	NA	NA	NA	NA	NA	NA	NA	NA	1	0	NA	NA	NA	NA	NA	NA	NA	NA	NA
MD01G1001000	0	0	0	0	0	0	0	0	0	0	0	0	0	0	0	0	0	0	0	0	0	0	1	0	NA	NA	NA	NA	NA	NA	NA	NA	NA	1	0	NA	NA	NA	NA	NA	NA	NA	NA	NA
MD01G1001200	595	715	631	0	1	0	0	0	0	548	561	535	0	1	0	0	0	0	179.79	548	0	0	0.001	-9.862	-8.974	2.86267e-19	3.98465e-18	0	0.0173	0.0305	0.0305	TRUE	0.6522	0.001	-10.598	-9.604	7.69186e-22	1.47698e-20	0	0.0173	0.0305	0.0305	TRUE	0.6522
MD01G1001300	0	0	0	1	0	0	1	3	0	0	0	0	1	0	0	1	3	0	0.39	0	0	1	1.086	0.119	0.309	0.75763	NA	0	4.0023	6.2053	6.2053	TRUE	0.0468	1.3	0.378	0.93	0.352125	NA	0	4.0023	6.2053	6.2053	TRUE	0.0468
MD01G1001600	14367	15818	14882	22781	25514	22449	16006	19222	12876	13225	12408	12613	21112	20693	21565	16345	17621	15306	15734.7	12749	21123	16424	1.615	0.691	5.665	1.46724e-08	7.32835e-08	0.013	0.0087	0.0119	0.0119	TRUE	0.1756	1.256	0.329	2.841	0.00449248	0.0104111	0.013	0.0087	0.0119	0.0119	TRUE	0.1756
MD01G1001800	1	2	4	1	2	1	1	3	2	1	2	3	1	2	1	1	3	2	1.72	2	1	2	0.872	-0.198	-0.611	0.541235	0.624618	0	0.9178	0.445	0.445	TRUE	0.1764	1.01	0.015	0.054	0.956649	0.973438	0	0.9178	0.445	0.445	TRUE	0.1764
MD01G1001900	278	292	321	318	373	296	272	302	245	256	229	272	295	303	284	278	277	291	374.88	252	294	282	1.158	0.211	2.108	0.0350609	0.0595717	0	0.0128	0.0048	0.0048	TRUE	0.0386	1.107	0.147	1.49	0.136145	0.205748	0	0.0128	0.0048	0.0048	TRUE	0.0386
MD01G1002000	76	79	70	151	191	139	158	211	110	70	62	59	140	155	134	161	193	131	128.38	64	143	162	2.163	1.113	6.515	7.25266e-11	4.71581e-10	0.0085	0.0208	0.0133	0.0133	TRUE	0.0636	2.489	1.316	7.547	4.44915e-14	4.77298e-13	0.0085	0.0208	0.0133	0.0133	TRUE	0.0636
MD01G1002100	0	0	0	1	1	3	1	0	0	0	0	0	1	1	3	1	0	0	0.47	0	2	0	1.527	0.611	1.287	0.198048	NA	0	3.3349	3.4298	3.4298	TRUE	0.2135	1.119	0.162	0.455	0.649004	NA	0	3.3349	3.4298	3.4298	TRUE	0.2135
MD01G1002300	0	0	0	0	0	0	0	0	0	0	0	0	0	0	0	0	0	0	0	0	0	0	1	0	NA	NA	NA	NA	NA	NA	NA	NA	NA	1	0	NA	NA	NA	NA	NA	NA	NA	NA	NA
MD01G1002400	420	533	514	468	574	493	403	422	332	387	418	436	434	466	474	412	387	395	364.47	414	458	398	1.102	0.14	1.518	0.129134	0.186134	0	0.0129	0.0046	0.0046	TRUE	0.0518	0.964	-0.053	-0.583	0.559632	0.651135	0	0.0129	0.0046	0.0046	TRUE	0.0518
MD01G1002500	0	0	1	0	0	0	0	0	0	0	0	1	0	0	0	0	0	0	0.15	0	0	0	0.948	-0.076	-0.2	0.841335	NA	0	10.6964	12	12	TRUE	0.2117	0.963	-0.055	-0.153	0.87841	NA	0	10.6964	12	12	TRUE	0.2117
MD01G1003000	0	0	0	0	0	0	0	0	0	0	0	0	0	0	0	0	0	0	0	0	0	0	1	0	NA	NA	NA	NA	NA	NA	NA	NA	NA	1	0	NA	NA	NA	NA	NA	NA	NA	NA	NA
MD01G1003600	445	515	418	314	471	345	461	526	453	410	404	354	291	382	331	471	482	538	611.16	389	335	497	0.879	-0.186	-1.129	0.258881	0.338642	0.031	0.0112	0.0241	0.0241	TRUE	0.0747	1.218	0.284	1.846	0.0648249	0.109465	0.031	0.0112	0.0241	0.0241	TRUE	0.0747
MD01G1003700	3	2	1	6	3	2	4	3	1	3	2	1	6	2	2	4	3	1	3.08	2	3	3	1.256	0.329	1.003	0.315846	0.400596	0	0.5158	0.2615	0.2615	TRUE	0.2532	1.139	0.188	0.684	0.49419	0.591278	0	0.5158	0.2615	0.2615	TRUE	0.2532
MD01G1003800	74	102	81	23	19	10	5	3	2	68	80	69	21	15	10	5	3	2	31.17	72	15	3	0.227	-2.141	-7.039	1.93307e-12	1.48934e-11	0	0.0588	0.0371	0.0371	TRUE	0.2557	0.051	-4.296	-8.492	2.03623e-17	2.87073e-16	0	0.0588	0.0371	0.0371	TRUE	0.2557
MD01G1004000	47	28	55	7	17	9	6	9	10	43	22	47	6	14	9	6	8	12	17.83	37	10	9	0.381	-1.392	-3.005	0.00265662	0.00584352	0.3626	0.0963	0.2431	0.2431	TRUE	3.6559	0.335	-1.579	-3.178	0.001485	0.00383276	0.3626	0.0963	0.2431	0.2431	TRUE	3.6559
MD01G1004100	105	125	130	23	24	16	19	31	28	97	98	110	21	19	15	19	28	33	57.82	102	18	27	0.193	-2.37	-7.87	3.54744e-15	3.5522e-14	0.0452	0.0357	0.0411	0.0411	TRUE	0.8131	0.281	-1.834	-6.409	1.46678e-10	1.09174e-09	0.0452	0.0357	0.0411	0.0411	TRUE	0.8131
MD01G1004200	745	786	720	651	817	648	667	717	572	686	617	610	603	663	622	681	657	680	653.74	638	629	673	0.989	-0.016	-0.2	0.841778	0.883476	0	0.011	0.0033	0.0033	TRUE	0.0253	1.053	0.074	0.967	0.33353	0.432092	0	0.011	0.0033	0.0033	TRUE	0.0253
MD01G1004300	3696	4903	3920	3338	3432	3146	3629	3606	2979	3402	3846	3322	3093	2783	3022	3706	3306	3541	3457.37	3523	2966	3518	0.855	-0.226	-1.657	0.0975032	0.14571	0.0183	0.0091	0.0159	0.0159	TRUE	0.0938	0.998	-0.002	-0.017	0.986257	0.994902	0.0183	0.0091	0.0159	0.0159	TRUE	0.0938
MD01G1004400	1	1	1	0	0	0	0	0	0	1	1	1	0	0	0	0	0	0	1.84	1	0	0	0.648	-0.625	-1.411	0.158338	0.221871	0	0.859	0.5208	0.5208	TRUE	0.1032	0.705	-0.504	-1.286	0.198287	0.281981	0	0.859	0.5208	0.5208	TRUE	0.1032
MD01G1004500	0	0	0	0	0	1	0	1	0	0	0	0	0	0	1	0	1	0	0.16	0	0	0	1.065	0.09	0.236	0.813239	NA	0	10.003	12	12	TRUE	0.2449	1.074	0.103	0.283	0.776832	NA	0	10.003	12	12	TRUE	0.2449
MD01G1004600	0	0	0	0	0	0	0	0	0	0	0	0	0	0	0	0	0	0	0	0	0	0	1	0	NA	NA	NA	NA	NA	NA	NA	NA	NA	1	0	NA	NA	NA	NA	NA	NA	NA	NA	NA
MD01G1004700	1146	1164	1666	1658	1913	1885	1599	1546	1022	1055	913	1412	1537	1552	1811	1633	1417	1215	1420.87	1127	1633	1422	1.402	0.487	3.375	0.000737961	0.00181246	0.0216	0.0097	0.0175	0.0175	TRUE	0.2905	1.22	0.287	2.114	0.0345513	0.0635815	0.0216	0.0097	0.0175	0.0175	TRUE	0.2905
MD01G1005100	0	0	0	0	0	0	0	0	0	0	0	0	0	0	0	0	0	0	0	0	0	0	1	0	NA	NA	NA	NA	NA	NA	NA	NA	NA	1	0	NA	NA	NA	NA	NA	NA	NA	NA	NA
MD01G1005300	53	58	45	25	40	33	23	34	21	49	45	38	23	32	32	23	31	25	28.63	44	29	26	0.726	-0.462	-2.104	0.0353865	0.0600592	0	0.0632	0.033	0.033	TRUE	0.3162	0.69	-0.535	-2.473	0.01341	0.0276245	0	0.0632	0.033	0.033	TRUE	0.3162
MD01G1005400	266	353	297	171	204	175	255	249	229	245	277	252	158	165	168	260	228	272	288.53	258	164	253	0.661	-0.598	-4.036	5.42819e-05	0.000162663	0.0147	0.014	0.0145	0.0145	TRUE	0.0497	0.985	-0.023	-0.169	0.865619	0.904299	0.0147	0.014	0.0145	0.0145	TRUE	0.0497
MD01G1005500	317	400	366	291	346	254	327	370	311	292	314	310	270	281	244	334	339	370	307.3	305	265	348	0.876	-0.191	-1.654	0.0980365	0.146348	0.0049	0.0137	0.0079	0.0079	TRUE	0.1257	1.122	0.166	1.511	0.130894	0.198998	0.0049	0.0137	0.0079	0.0079	TRUE	0.1257
MD01G1005600	184	284	242	131	147	119	128	182	146	169	223	205	121	119	114	131	167	174	164.44	199	118	157	0.621	-0.688	-4.37	1.2452e-05	4.13625e-05	0.0139	0.0181	0.0155	0.0155	TRUE	0.174	0.818	-0.29	-2.032	0.0422043	0.0756706	0.0139	0.0181	0.0155	0.0155	TRUE	0.174
MD01G1005700	370	410	402	352	424	344	257	294	241	341	322	341	326	344	330	262	270	286	362.39	335	333	273	0.998	-0.002	-0.019	0.984869	0.994497	0.0101	0.0129	0.0109	0.0109	TRUE	0.14	0.836	-0.258	-2.1	0.0357377	0.0654772	0.0101	0.0129	0.0109	0.0109	TRUE	0.14
MD01G1005800	3	2	2	0	6	1	2	10	9	3	2	2	0	5	1	2	9	11	3.73	2	2	7	1.002	0.003	0.009	0.992787	1	0.61	0.4281	0.5105	0.5105	TRUE	0.2012	1.633	0.708	1.779	0.0752934	0.124559	0.61	0.4281	0.5105	0.5105	TRUE	0.2012
MD01G1005900	3	2	1	5	4	3	2	5	5	3	2	1	5	3	3	2	5	6	2.38	2	4	4	1.29	0.368	1.092	0.27496	0.356251	0	0.6668	0.3191	0.3191	TRUE	0.0997	1.337	0.419	1.31	0.190043	0.272252	0	0.6668	0.3191	0.3191	TRUE	0.0997
MD01G1006000	0	1	0	0	0	1	0	0	0	0	1	0	0	0	1	0	0	0	0.3	0	0	0	1.006	0.008	0.022	0.98253	NA	0	5.2774	7.4975	7.4975	TRUE	0.4493	0.955	-0.067	-0.186	0.852647	NA	0	5.2774	7.4975	7.4975	TRUE	0.4493
MD01G1006100	0	0	0	0	1	0	0	0	0	0	0	0	0	1	0	0	0	0	0.19	0	0	0	1.065	0.09	0.236	0.813239	NA	0	8.2429	12	12	TRUE	0.32	1	0	0	1	NA	0	8.2429	12	12	TRUE	0.32
MD01G1006200	17	12	27	33	32	28	60	59	41	16	9	23	31	26	27	61	54	49	47.84	16	28	55	1.536	0.619	2.543	0.0109919	0.0211501	0.0172	0.0413	0.0297	0.0297	TRUE	0.167	3.239	1.696	5.913	3.35203e-09	2.12327e-08	0.0172	0.0413	0.0297	0.0297	TRUE	0.167
MD01G1006300	219	288	244	286	330	312	262	285	217	202	226	207	265	268	300	268	261	258	205.25	212	278	262	1.291	0.368	3.443	0.000574786	0.00144199	0	0.0162	0.0056	0.0056	TRUE	0.027	1.216	0.283	2.687	0.00721135	0.0158903	0	0.0162	0.0056	0.0056	TRUE	0.027
MD01G1006400	318	417	324	338	336	330	244	241	208	293	327	275	313	273	317	249	221	247	246.5	298	301	239	1.007	0.009	0.085	0.932161	0.956685	0	0.015	0.0073	0.0073	TRUE	0.0426	0.817	-0.291	-2.619	0.0088239	0.0190518	0	0.015	0.0073	0.0073	TRUE	0.0426
MD01G1006500	0	0	0	0	0	0	0	0	0	0	0	0	0	0	0	0	0	0	0	0	0	0	1	0	NA	NA	NA	NA	NA	NA	NA	NA	NA	1	0	NA	NA	NA	NA	NA	NA	NA	NA	NA
MD01G1006600	1647	1366	1718	1098	1309	1356	1233	1279	896	1516	1072	1456	1018	1062	1303	1259	1172	1065	1100.9	1348	1128	1165	0.849	-0.235	-1.779	0.0752955	0.116312	0.0152	0.01	0.0144	0.0144	TRUE	0.1949	0.882	-0.18	-1.439	0.150265	0.223536	0.0152	0.01	0.0144	0.0144	TRUE	0.1949
MD01G1006900	0	0	0	0	0	0	0	0	0	0	0	0	0	0	0	0	0	0	0	0	0	0	1	0	NA	NA	NA	NA	NA	NA	NA	NA	NA	1	0	NA	NA	NA	NA	NA	NA	NA	NA	NA
MD01G1007000	0	0	0	0	3	0	0	0	2	0	0	0	0	2	0	0	0	2	0.58	0	1	1	1.294	0.372	0.89	0.373513	NA	7.1257	2.6926	3.7374	3.7374	TRUE	0.7205	1.25	0.322	0.835	0.403866	NA	7.1257	2.6926	3.7374	3.7374	TRUE	0.7205
MD01G1007200	7	7	10	0	0	0	0	0	0	6	5	8	0	0	0	0	0	0	1.7	6	0	0	0.081	-3.629	-3.192	0.00141348	0.00327606	0	0.9279	0.9735	0.9735	TRUE	0.0645	0.1	-3.325	-3.068	0.00215412	0.00537917	0	0.9279	0.9735	0.9735	TRUE	0.0645
MD01G1007300	8	16	13	9	13	5	5	8	3	7	13	11	8	11	5	5	7	4	5.89	10	8	5	0.88	-0.184	-0.66	0.509173	0.594739	0	0.2743	0.1411	0.1411	TRUE	0.1175	0.746	-0.424	-1.503	0.132741	0.201356	0	0.2743	0.1411	0.1411	TRUE	0.1175
MD01G1007700	0	0	0	2	2	2	2	5	1	0	0	0	2	2	2	2	5	1	2.23	0	2	3	3.023	1.596	2.318	0.0204298	0.0368443	0	0.7111	0.4131	0.4131	TRUE	0.2907	5.127	2.358	2.744	0.00606468	0.013604	0	0.7111	0.4131	0.4131	TRUE	0.2907
MD01G1007800	1	2	6	1	2	3	0	4	0	1	2	5	1	2	3	0	4	0	1.62	3	2	1	0.922	-0.116	-0.361	0.718243	0.780444	0.8224	0.976	0.9081	0.9081	TRUE	0.9466	0.866	-0.207	-0.677	0.498365	0.59505	0.8224	0.976	0.9081	0.9081	TRUE	0.9466
MD01G1007900	2	2	4	4	2	2	1	4	1	2	2	3	4	2	2	1	4	1	2.57	2	3	2	1.019	0.027	0.09	0.928518	0.95392	0	0.6164	0.2654	0.2654	TRUE	0.2936	0.971	-0.042	-0.161	0.871765	0.90878	0	0.6164	0.2654	0.2654	TRUE	0.2936
MD01G1008700	316	323	358	212	272	222	174	239	216	291	253	303	196	221	213	178	219	257	186.98	282	210	218	0.764	-0.388	-2.808	0.00499108	0.0103664	0.0102	0.017	0.0129	0.0129	TRUE	0.0974	0.797	-0.327	-2.473	0.0134098	0.0276245	0.0102	0.017	0.0129	0.0129	TRUE	0.0974
MD01G1008800	18	19	24	23	8	17	32	29	23	17	15	20	21	6	16	33	27	27	22.54	17	14	29	0.896	-0.159	-0.651	0.514738	0.599906	0.0173	0.078	0.0511	0.0511	TRUE	0.5738	1.401	0.486	2.06	0.0394188	0.0713176	0.0173	0.078	0.0511	0.0511	TRUE	0.5738
MD01G1008900	782	932	832	938	1102	901	900	1060	761	720	731	705	869	894	866	919	972	905	830.44	719	876	932	1.207	0.271	2.606	0.00916631	0.0179721	0.006	0.0105	0.0076	0.0076	TRUE	0.1081	1.272	0.347	3.409	0.000650974	0.00181835	0.006	0.0105	0.0076	0.0076	TRUE	0.1081
MD01G1009600	0	0	0	1	0	0	0	0	0	0	0	0	1	0	0	0	0	0	0.3	0	0	0	1.065	0.09	0.236	0.813241	NA	12	5.148	12	12	TRUE	0.7205	1	0	0	1	NA	12	5.148	12	12	TRUE	0.7205
MD01G1009700	125	116	108	164	198	165	141	139	103	115	91	92	152	161	159	144	127	122	123.27	99	157	131	1.537	0.62	4.524	6.06882e-06	2.11284e-05	0	0.0213	0.0086	0.0086	TRUE	0.094	1.281	0.357	2.69	0.00713734	0.0157412	0	0.0213	0.0086	0.0086	TRUE	0.094
MD01G1009800	157	140	167	58	64	54	73	71	53	145	110	142	54	52	52	75	65	63	76.42	132	53	68	0.414	-1.272	-6.817	9.29161e-12	6.66829e-11	0	0.0291	0.0155	0.0155	TRUE	0.1489	0.54	-0.889	-5.023	5.0839e-07	2.40338e-06	0	0.0291	0.0155	0.0155	TRUE	0.1489
MD01G1009900	117	115	119	57	84	75	69	81	72	108	90	101	53	68	72	70	74	86	72.1	100	64	77	0.685	-0.546	-3.094	0.00197152	0.00444539	0.0066	0.0303	0.0184	0.0184	TRUE	0.2571	0.813	-0.299	-1.868	0.0617126	0.104999	0.0066	0.0303	0.0184	0.0184	TRUE	0.2571
MD01G1010000	249	243	297	229	283	211	210	220	176	229	191	252	212	230	203	214	202	209	199.39	224	215	208	0.965	-0.051	-0.41	0.681971	0.749776	0.0056	0.0165	0.0095	0.0095	TRUE	0.0979	0.941	-0.088	-0.733	0.463391	0.56222	0.0056	0.0165	0.0095	0.0095	TRUE	0.0979
MD01G1010100	2627	3221	2969	3259	3771	3055	2019	2213	1677	2418	2527	2516	3020	3058	2935	2062	2029	1993	1950.12	2487	3004	2028	1.203	0.267	3.917	8.96796e-05	0.000259357	0.0002	0.0094	0.0032	0.0032	TRUE	0.1129	0.821	-0.284	-4.166	3.09508e-05	0.000110224	0.0002	0.0094	0.0032	0.0032	TRUE	0.1129
MD01G1010200	2	8	8	2	6	5	2	7	1	2	6	7	2	5	5	2	6	1	3.34	5	4	3	0.914	-0.13	-0.435	0.663382	0.733441	0	0.4768	0.3394	0.3394	TRUE	0.5798	0.885	-0.176	-0.66	0.509227	0.605094	0	0.4768	0.3394	0.3394	TRUE	0.5798
MD01G1010300	0	1	1	2	4	3	4	3	3	0	1	1	2	3	3	4	3	4	2.26	1	3	4	1.723	0.785	1.712	0.0869878	0.131888	0	0.7	0.3235	0.3235	TRUE	0.1408	2.025	1.018	2.007	0.0447496	0.0796265	0	0.7	0.3235	0.3235	TRUE	0.1408
MD01G1010900	87	138	115	57	44	43	94	105	86	80	108	97	53	36	41	96	96	102	67.85	95	43	98	0.478	-1.066	-5.346	9.00551e-08	4.04729e-07	0.0062	0.0317	0.0184	0.0184	TRUE	0.1497	1.021	0.029	0.192	0.847742	0.890512	0.0062	0.0317	0.0184	0.0184	TRUE	0.1497
MD01G1011000	0	0	0	0	0	0	0	0	0	0	0	0	0	0	0	0	0	0	0	0	0	0	1	0	NA	NA	NA	NA	NA	NA	NA	NA	NA	1	0	NA	NA	NA	NA	NA	NA	NA	NA	NA
MD01G1011600	3	10	12	0	0	2	2	3	1	3	8	10	0	0	2	2	3	1	3.36	7	1	2	0.215	-2.215	-2.827	0.00469197	0.00980024	0	0.4735	0.3191	0.3191	TRUE	0.3505	0.596	-0.746	-1.892	0.0585554	0.100426	0	0.4735	0.3191	0.3191	TRUE	0.3505
MD01G1011700	506	561	562	434	457	405	368	370	261	466	440	476	402	371	389	376	339	310	418.73	461	387	342	0.847	-0.24	-2.558	0.0105193	0.020332	0.0012	0.0124	0.0048	0.0048	TRUE	0.0422	0.757	-0.402	-4.257	2.06794e-05	7.58765e-05	0.0012	0.0124	0.0048	0.0048	TRUE	0.0422
MD01G1011800	74	70	67	94	217	129	83	85	76	68	55	57	87	176	124	85	78	90	110.45	60	129	84	2.019	1.014	4.8	1.5859e-06	6.01669e-06	0.0315	0.0228	0.0282	0.0282	TRUE	0.1128	1.294	0.372	2.054	0.0399383	0.072149	0.0315	0.0228	0.0282	0.0282	TRUE	0.1128
MD01G1012000	69	101	76	117	129	93	82	86	61	64	79	64	108	105	89	84	79	73	77.68	69	101	79	1.396	0.482	2.998	0.0027197	0.00596925	0	0.0288	0.0131	0.0131	TRUE	0.0818	1.105	0.144	0.957	0.338488	0.437073	0	0.0288	0.0131	0.0131	TRUE	0.0818
MD01G1012100	484	554	430	796	813	703	597	648	421	446	435	364	738	659	675	610	594	500	539.85	415	691	568	1.617	0.694	5.387	7.16322e-08	3.27108e-07	0.0119	0.0115	0.0118	0.0118	TRUE	0.1312	1.327	0.408	3.301	0.000964353	0.00259233	0.0119	0.0115	0.0118	0.0118	TRUE	0.1312
MD01G1012300	264	359	353	365	350	334	349	361	294	243	282	299	338	284	321	356	331	349	284.65	275	314	345	1.132	0.179	1.526	0.126958	0.18347	0.0053	0.0141	0.0084	0.0084	TRUE	0.0902	1.228	0.297	2.614	0.00894714	0.0192888	0.0053	0.0141	0.0084	0.0084	TRUE	0.0902
MD01G1012400	0	0	0	4	7	5	4	8	3	0	0	0	4	6	5	4	7	4	2.43	0	5	5	13.69	3.775	3.466	0.000528508	0.00133406	0	0.6518	0.3604	0.3604	TRUE	0.1887	14.882	3.896	3.52	0.000431437	0.0012487	0	0.6518	0.3604	0.3604	TRUE	0.1887
MD01G1012600	939	1075	1024	998	1178	1056	712	752	630	864	843	868	925	955	1014	727	689	749	646.93	858	965	722	1.12	0.164	2.169	0.0301097	0.0519931	0	0.011	0.0034	0.0034	TRUE	0.0661	0.847	-0.24	-3.148	0.00164285	0.00420292	0	0.011	0.0034	0.0034	TRUE	0.0661
MD01G1012700	0	1	0	0	0	0	0	0	1	0	1	0	0	0	0	0	0	1	0.16	0	0	0	0.948	-0.076	-0.2	0.841335	NA	0	9.5177	12	12	TRUE	0.2804	1.016	0.023	0.065	0.947985	NA	0	9.5177	12	12	TRUE	0.2804
MD01G1012800	0	0	0	26	34	33	0	0	2	0	0	0	24	28	32	0	0	2	7.15	0	28	1	101.019	6.658	5.853	4.84141e-09	2.55898e-08	0	0.2274	0.1594	0.1594	TRUE	0.4161	1.437	0.523	1.329	0.183935	0.264926	0	0.2274	0.1594	0.1594	TRUE	0.4161
MD01G1013000	2	3	4	106	97	90	15	21	14	2	2	3	98	79	86	15	19	17	28.11	2	88	17	31.819	4.992	9.488	2.35425e-21	3.76782e-20	0	0.0642	0.0371	0.0371	TRUE	0.4397	5.838	2.545	4.832	1.3542e-06	6.00025e-06	0	0.0642	0.0371	0.0371	TRUE	0.4397
MD01G1013200	0	0	0	2	2	0	0	1	2	0	0	0	2	2	0	0	1	2	0.56	0	1	1	1.423	0.509	1.138	0.255156	NA	0	2.7802	3.2926	3.2926	TRUE	0.0536	1.364	0.448	1.085	0.277991	NA	0	2.7802	3.2926	3.2926	TRUE	0.0536
MD01G1013300	68	91	90	124	119	90	67	96	60	63	71	76	115	97	86	68	88	71	84.92	70	99	76	1.354	0.437	2.629	0.00856494	0.0169104	0.0066	0.027	0.0156	0.0156	TRUE	0.0967	1.066	0.092	0.599	0.548941	0.641573	0.0066	0.027	0.0156	0.0156	TRUE	0.0967
MD01G1013400	513	591	676	682	883	749	482	504	437	472	464	573	632	716	719	492	462	519	517	503	689	491	1.337	0.419	3.183	0.00145833	0.00337332	0.0143	0.0116	0.0132	0.0132	TRUE	0.2748	0.979	-0.03	-0.241	0.80969	0.860602	0.0143	0.0116	0.0132	0.0132	TRUE	0.2748
MD01G1013500	20	29	26	69	49	65	36	28	24	18	23	22	64	40	62	37	26	29	39.13	21	55	31	2.378	1.25	4.656	3.22168e-06	1.16762e-05	0	0.0486	0.0354	0.0354	TRUE	0.2844	1.266	0.34	1.636	0.101795	0.161084	0	0.0486	0.0354	0.0354	TRUE	0.2844
MD01G1013800	11	11	8	0	0	0	0	1	0	10	9	7	0	0	0	0	1	0	2.2	9	0	0	0.042	-4.585	-3.82	0.000133639	0.000375737	0	0.718	0.5479	0.5479	TRUE	0.1369	0.126	-2.989	-3.034	0.0024131	0.00596042	0	0.718	0.5479	0.5479	TRUE	0.1369
MD01G1014200	1333	1395	1569	1664	2019	1588	1325	1782	1108	1227	1094	1330	1542	1637	1525	1353	1634	1317	1360.82	1217	1568	1435	1.268	0.342	2.882	0.00395666	0.00838889	0.0113	0.0098	0.011	0.011	TRUE	0.1172	1.159	0.213	1.869	0.0616548	0.104939	0.0113	0.0098	0.011	0.011	TRUE	0.1172
MD01G1014300	365	425	387	294	313	288	275	293	219	336	333	328	272	254	277	281	269	260	307.6	332	268	270	0.815	-0.295	-2.612	0.00901372	0.0177102	0.0043	0.0137	0.0075	0.0075	TRUE	0.1547	0.829	-0.271	-2.465	0.0136915	0.0281251	0.0043	0.0137	0.0075	0.0075	TRUE	0.1547
MD01G1014400	16	7	20	40	77	14	25	53	28	15	5	17	37	62	13	26	49	33	28.55	12	37	36	2.316	1.212	3.091	0.00199346	0.00448981	0.2176	0.0634	0.1515	0.1515	TRUE	0.0589	2.163	1.113	2.926	0.00343134	0.0081891	0.2176	0.0634	0.1515	0.1515	TRUE	0.0589
MD01G1014700	36	49	49	4	5	3	6	5	5	33	38	42	4	4	3	6	5	6	12.34	38	4	6	0.103	-3.283	-6.511	7.47096e-11	4.85183e-10	0	0.1354	0.06	0.06	TRUE	0.0943	0.16	-2.642	-5.801	6.60467e-09	4.03421e-08	0	0.1354	0.06	0.06	TRUE	0.0943
MD01G1014800	0	0	0	0	0	0	0	0	0	0	0	0	0	0	0	0	0	0	0	0	0	0	1	0	NA	NA	NA	NA	NA	NA	NA	NA	NA	1	0	NA	NA	NA	NA	NA	NA	NA	NA	NA
MD01G1015400	0	0	0	1	3	0	1	4	7	0	0	0	1	2	0	1	4	8	1.44	0	1	4	1.704	0.769	1.562	0.11838	0.172542	0	1.0946	1.0624	1.0624	TRUE	0.0368	6.063	2.6	2.747	0.00602062	0.0135206	0	1.0946	1.0624	1.0624	TRUE	0.0368
MD01G1015700	2	1	0	1	0	2	0	0	0	2	1	0	1	0	2	0	0	0	11.62	1	1	0	1.015	0.021	0.067	0.94642	0.96725	0	0.1432	0.1183	0.1183	TRUE	0.1857	0.67	-0.577	-1.44	0.149888	0.223073	0	0.1432	0.1183	0.1183	TRUE	0.1857
MD01G1015800	207	218	223	126	157	141	148	166	133	191	171	189	117	127	135	151	152	158	167.52	184	126	154	0.706	-0.503	-4.212	2.52962e-05	8.00081e-05	0	0.018	0.0058	0.0058	TRUE	0.0225	0.854	-0.228	-2.017	0.0436476	0.0779622	0	0.018	0.0058	0.0058	TRUE	0.0225
MD01G1016100	2	0	2	1	0	0	0	0	1	2	0	2	1	0	0	0	0	1	0.47	1	0	0	0.823	-0.282	-0.709	0.478117	NA	0	3.3286	3.6177	3.6177	TRUE	0.2804	0.853	-0.229	-0.63	0.528562	NA	0	3.3286	3.6177	3.6177	TRUE	0.2804
MD01G1016400	0	0	0	0	1	0	0	0	0	0	0	0	0	1	0	0	0	0	0.07	0	0	0	1.065	0.09	0.236	0.813237	NA	0	23.1429	12	12	TRUE	0.1698	1	0	0	1	NA	0	23.1429	12	12	TRUE	0.1698
MD01G1016500	415	490	446	446	418	424	337	386	294	382	384	378	413	339	407	344	354	349	354.08	381	386	349	1.011	0.016	0.124	0.901577	0.931787	0.0122	0.013	0.0125	0.0125	TRUE	0.2752	0.927	-0.11	-0.882	0.378025	0.477898	0.0122	0.013	0.0125	0.0125	TRUE	0.2752
MD01G1016600	142	184	142	184	227	188	121	166	99	131	144	120	171	184	181	124	152	118	125.48	132	179	131	1.263	0.337	1.604	0.108742	0.160213	0.0727	0.0211	0.0476	0.0476	TRUE	0.8568	0.998	-0.004	-0.02	0.984242	0.993373	0.0727	0.0211	0.0476	0.0476	TRUE	0.8568
MD01G1016700	239	263	261	125	150	134	220	193	150	220	206	221	116	122	129	225	177	178	199.3	216	122	193	0.581	-0.783	-6.192	5.94024e-10	3.49995e-09	0	0.0165	0.0071	0.0071	TRUE	0.1098	0.907	-0.14	-1.237	0.215967	0.302828	0	0.0165	0.0071	0.0071	TRUE	0.1098
MD01G1017000	631	671	675	802	1021	782	573	801	560	581	526	572	743	828	751	585	734	666	586.37	560	774	662	1.349	0.432	3.262	0.00110647	0.00262354	0.0155	0.0113	0.0135	0.0135	TRUE	0.2906	1.157	0.21	1.675	0.0939684	0.150538	0.0155	0.0113	0.0135	0.0135	TRUE	0.2906
MD01G1017100	16	19	12	197	187	206	185	136	116	15	15	10	183	152	198	189	125	138	89.81	13	178	151	13.082	3.71	13.21	7.63826e-40	3.33135e-38	0	0.026	0.0232	0.0232	TRUE	0.2247	11.1	3.472	12.281	1.15028e-34	4.32398e-33	0	0.026	0.0232	0.0232	TRUE	0.2247
MD01G1017400	258	239	333	319	346	315	299	314	260	237	187	282	296	281	303	305	288	309	337.99	235	293	301	1.222	0.29	2.253	0.0242629	0.0429572	0.0094	0.0132	0.0107	0.0107	TRUE	0.1866	1.24	0.31	2.505	0.0122488	0.0255028	0.0094	0.0132	0.0107	0.0107	TRUE	0.1866
MD01G1017500	0	0	0	0	0	0	0	0	1	0	0	0	0	0	0	0	0	1	0.1	0	0	0	1	0	0	1	NA	0	15.793	12	12	TRUE	0.2804	1.074	0.103	0.283	0.77683	NA	0	15.793	12	12	TRUE	0.2804
MD01G1017700	458	550	458	436	580	459	391	482	297	422	431	388	404	470	441	399	442	353	410.27	414	438	398	1.056	0.079	0.709	0.478329	0.564888	0.0062	0.0124	0.0082	0.0082	TRUE	0.0691	0.968	-0.047	-0.435	0.663792	0.741302	0.0062	0.0124	0.0082	0.0082	TRUE	0.0691
MD01G1017800	8	6	3	39	61	42	70	93	57	7	5	3	36	49	40	71	85	68	48.04	5	42	75	8.28	3.05	7.485	7.13325e-14	6.3804e-13	0	0.0412	0.0273	0.0273	TRUE	0.1963	14.95	3.902	9.621	6.54487e-22	1.26194e-20	0	0.0412	0.0273	0.0273	TRUE	0.1963
MD01G1017900	2814	3161	3097	1567	2023	1599	1569	1867	1697	2590	2480	2625	1452	1641	1536	1602	1712	2017	2351.35	2565	1543	1777	0.615	-0.701	-6.156	7.43951e-10	4.33603e-09	0.0099	0.0093	0.0098	0.0098	TRUE	0.1126	0.711	-0.492	-4.452	8.48802e-06	3.31908e-05	0.0099	0.0093	0.0098	0.0098	TRUE	0.1126
MD01G1018100	277	320	332	273	382	260	241	259	234	255	251	281	253	310	250	246	237	278	220.84	262	271	254	1.031	0.044	0.358	0.720685	0.782504	0.0063	0.0157	0.0098	0.0098	TRUE	0.1145	0.97	-0.044	-0.372	0.710178	0.780449	0.0063	0.0157	0.0098	0.0098	TRUE	0.1145
MD01G1018200	161	174	194	187	183	169	144	144	108	148	136	164	173	148	162	147	132	128	128.47	149	161	136	1.07	0.098	0.758	0.448501	0.536045	0	0.0208	0.0088	0.0088	TRUE	0.0404	0.921	-0.119	-0.944	0.345195	0.444195	0	0.0208	0.0088	0.0088	TRUE	0.0404
MD01G1018400	0	0	0	1	0	3	3	3	3	0	0	0	1	0	3	3	3	4	1.55	0	1	3	1.96	0.971	1.813	0.0697584	0.108836	0	1.0146	0.5727	0.5727	TRUE	0.3651	5.651	2.499	2.779	0.00545301	0.0123643	0	1.0146	0.5727	0.5727	TRUE	0.3651
MD01G1018500	0	0	0	0	0	0	0	0	0	0	0	0	0	0	0	0	0	0	0	0	0	0	1	0	NA	NA	NA	NA	NA	NA	NA	NA	NA	1	0	NA	NA	NA	NA	NA	NA	NA	NA	NA
MD01G1018600	0	0	1	14	9	9	8	7	7	0	0	1	13	7	9	8	6	8	12.04	0	10	7	18.902	4.24	4.001	6.3129e-05	0.000187263	0	0.1384	0.069	0.069	TRUE	0.1976	14.008	3.808	3.694	0.000220952	0.000675906	0	0.1384	0.069	0.069	TRUE	0.1976
MD01G1018700	0	0	0	0	0	1	0	0	0	0	0	0	0	0	1	0	0	0	0.19	0	0	0	1.065	0.09	0.236	0.813239	NA	0	8.4123	12	12	TRUE	0.2449	1	0	0	1	NA	0	8.4123	12	12	TRUE	0.2449
MD01G1018800	288	329	300	287	310	279	213	234	171	265	258	254	266	251	268	218	215	203	242.29	259	262	212	1.009	0.013	0.095	0.924281	0.950405	0.0117	0.0151	0.013	0.013	TRUE	0.3348	0.842	-0.248	-1.886	0.0592745	0.101443	0.0117	0.0151	0.013	0.013	TRUE	0.3348
MD01G1019000	51	66	56	57	72	45	35	51	33	47	52	47	53	58	43	36	47	39	40.41	49	51	41	1.047	0.066	0.349	0.72706	0.787661	0	0.0473	0.023	0.023	TRUE	0.2539	0.88	-0.185	-1.049	0.294142	0.390354	0	0.0473	0.023	0.023	TRUE	0.2539
MD01G1019100	0	0	0	0	0	0	0	0	0	0	0	0	0	0	0	0	0	0	0	0	0	0	1	0	NA	NA	NA	NA	NA	NA	NA	NA	NA	1	0	NA	NA	NA	NA	NA	NA	NA	NA	NA
MD01G1019200	0	1	1	0	2	0	0	0	0	0	1	1	0	2	0	0	0	0	0.39	1	1	0	1.001	0.002	0.006	0.995526	NA	0	3.9824	4.1375	4.1375	TRUE	0.4867	0.874	-0.194	-0.534	0.593579	NA	0	3.9824	4.1375	4.1375	TRUE	0.4867
MD01G1019300	0	0	0	0	0	0	0	0	0	0	0	0	0	0	0	0	0	0	0	0	0	0	1	0	NA	NA	NA	NA	NA	NA	NA	NA	NA	1	0	NA	NA	NA	NA	NA	NA	NA	NA	NA
MD01G1019500	1086	1248	1157	849	990	794	1184	1269	1114	1000	979	981	787	803	763	1209	1163	1324	1058.68	987	784	1232	0.803	-0.316	-3.265	0.00109584	0.0026003	0.0051	0.0101	0.0064	0.0064	TRUE	0.102	1.23	0.299	3.193	0.0014089	0.00365276	0.0051	0.0101	0.0064	0.0064	TRUE	0.102
MD01G1019600	63	71	84	31	32	29	47	47	46	58	56	71	29	26	28	48	43	55	42.95	62	28	49	0.488	-1.035	-4.332	1.47466e-05	4.84196e-05	0.0142	0.045	0.0289	0.0289	TRUE	0.5926	0.842	-0.249	-1.374	0.169507	0.247484	0.0142	0.045	0.0289	0.0289	TRUE	0.5926
MD01G1019700	1637	1956	1857	2075	2416	1937	1817	1983	1531	1507	1534	1574	1923	1959	1861	1855	1818	1820	1621.71	1538	1914	1831	1.229	0.298	2.731	0.00630505	0.0128003	0.0091	0.0096	0.0091	0.0091	TRUE	0.1919	1.172	0.228	2.17	0.030042	0.0562636	0.0091	0.0096	0.0091	0.0091	TRUE	0.1919
MD01G1019800	552	680	562	222	257	220	227	243	171	508	533	476	206	208	211	232	223	203	369.19	506	208	219	0.417	-1.261	-11.19	4.57565e-29	1.16468e-27	0.0036	0.0129	0.0064	0.0064	TRUE	0.0748	0.439	-1.187	-10.416	2.1026e-25	4.9972e-24	0.0036	0.0129	0.0064	0.0064	TRUE	0.0748
MD01G1019900	0	0	0	0	0	0	0	0	0	0	0	0	0	0	0	0	0	0	0	0	0	0	1	0	NA	NA	NA	NA	NA	NA	NA	NA	NA	1	0	NA	NA	NA	NA	NA	NA	NA	NA	NA
MD01G1020000	0	0	0	0	0	0	0	0	0	0	0	0	0	0	0	0	0	0	0	0	0	0	1	0	NA	NA	NA	NA	NA	NA	NA	NA	NA	1	0	NA	NA	NA	NA	NA	NA	NA	NA	NA
MD01G1020100	152	229	169	142	160	139	105	125	76	140	180	143	132	130	134	107	115	90	154.64	154	132	104	0.871	-0.2	-1.23	0.218564	0.293016	0.0197	0.0187	0.0193	0.0193	TRUE	0.0585	0.721	-0.473	-2.918	0.00352755	0.00839722	0.0197	0.0187	0.0193	0.0193	TRUE	0.0585
MD01G1020300	3240	3649	3223	4030	4778	3963	3360	3430	2632	2982	2862	2732	3735	3875	3807	3431	3144	3129	3252.44	2859	3806	3235	1.323	0.404	5.853	4.82162e-09	2.54947e-08	0.0019	0.0091	0.0033	0.0033	TRUE	0.0269	1.126	0.172	2.515	0.0119075	0.0248714	0.0019	0.0091	0.0033	0.0033	TRUE	0.0269
MD01G1020400	5	16	7	52	50	42	47	50	40	5	13	6	48	41	40	48	46	48	48.17	8	43	47	5.132	2.36	6.879	6.03006e-12	4.40818e-11	0.0144	0.0411	0.0271	0.0271	TRUE	0.2819	5.666	2.502	7.225	5.00018e-13	4.82523e-12	0.0144	0.0411	0.0271	0.0271	TRUE	0.2819
MD01G1020500	11	14	19	7	5	6	7	6	10	10	11	16	6	4	6	7	6	12	14.04	12	5	8	0.576	-0.795	-2.399	0.0164223	0.0302772	0	0.12	0.0643	0.0643	TRUE	0.0868	0.798	-0.325	-1.337	0.181372	0.261893	0	0.12	0.0643	0.0643	TRUE	0.0868
MD01G1020600	3	7	0	0	0	0	0	0	0	3	5	0	0	0	0	0	0	0	0.69	3	0	0	0.664	-0.59	-1.24	0.215134	NA	12	2.2822	6.5799	6.5799	TRUE	0.0061	0.698	-0.518	-1.176	0.239567	NA	12	2.2822	6.5799	6.5799	TRUE	0.0061
MD01G1021000	4595	5547	4624	4881	6022	4905	4644	4813	3405	4230	4351	3919	4523	4884	4712	4742	4412	4047	3816.32	4167	4706	4400	1.126	0.171	2.181	0.0291844	0.0506274	0.0031	0.009	0.0045	0.0045	TRUE	0.0297	1.053	0.075	0.979	0.327518	0.425856	0.0031	0.009	0.0045	0.0045	TRUE	0.0297
MD01G1021100	0	0	0	0	0	0	0	0	0	0	0	0	0	0	0	0	0	0	0	0	0	0	1	0	NA	NA	NA	NA	NA	NA	NA	NA	NA	1	0	NA	NA	NA	NA	NA	NA	NA	NA	NA
MD01G1021200	0	0	0	0	0	0	0	0	0	0	0	0	0	0	0	0	0	0	0	0	0	0	1	0	NA	NA	NA	NA	NA	NA	NA	NA	NA	1	0	NA	NA	NA	NA	NA	NA	NA	NA	NA
MD01G1021300	0	0	0	0	0	0	0	0	0	0	0	0	0	0	0	0	0	0	0	0	0	0	1	0	NA	NA	NA	NA	NA	NA	NA	NA	NA	1	0	NA	NA	NA	NA	NA	NA	NA	NA	NA
MD01G1021400	1	3	1	1	0	2	1	1	0	1	2	1	1	0	2	1	1	0	1.12	1	1	1	0.906	-0.142	-0.435	0.663657	0.733681	0	1.4023	0.5998	0.5998	TRUE	0.1533	0.862	-0.214	-0.685	0.493164	0.590429	0	1.4023	0.5998	0.5998	TRUE	0.1533
MD01G1021500	0	0	0	0	0	0	0	0	0	0	0	0	0	0	0	0	0	0	0.08	0	0	0	1	0	0	1	NA	0	20.6719	12	12	TRUE	0.1097	1	0	0	1	NA	0	20.6719	12	12	TRUE	0.1097
MD01G1021600	20	28	27	12	24	15	14	14	13	18	22	23	11	19	14	14	13	15	24.94	21	15	14	0.791	-0.338	-1.431	0.152292	0.214608	0	0.0713	0.0321	0.0321	TRUE	0.1871	0.776	-0.365	-1.66	0.0969986	0.15455	0	0.0713	0.0321	0.0321	TRUE	0.1871
MD01G1021700	13	11	6	19	15	17	14	11	7	12	9	5	18	12	16	14	10	8	12.67	9	15	11	1.455	0.541	1.9	0.0573845	0.0917608	0	0.132	0.0638	0.0638	TRUE	0.1871	1.129	0.175	0.774	0.438801	0.537935	0	0.132	0.0638	0.0638	TRUE	0.1871
MD01G1021800	300	372	353	273	381	292	255	306	242	276	292	299	253	309	280	260	281	288	348.5	289	281	276	0.974	-0.037	-0.299	0.764803	0.820281	0.0089	0.0131	0.0102	0.0102	TRUE	0.0741	0.96	-0.058	-0.487	0.626234	0.709041	0.0089	0.0131	0.0102	0.0102	TRUE	0.0741
MD01G1021900	0	0	0	0	0	0	1	1	0	0	0	0	0	0	0	1	1	0	0.24	0	0	1	1	0	0	1	NA	0	6.6015	8.6553	8.6553	TRUE	0.1097	1.151	0.203	0.542	0.587963	NA	0	6.6015	8.6553	8.6553	TRUE	0.1097
MD01G1022200	0	0	3	0	0	0	0	0	0	0	0	3	0	0	0	0	0	0	0.73	1	0	0	0.792	-0.337	-0.814	0.415475	0.503528	12	2.1502	4.5596	4.5596	TRUE	0.0612	0.822	-0.283	-0.743	0.457748	0.556678	12	2.1502	4.5596	4.5596	TRUE	0.0612
MD01G1022300	1134	1326	1152	697	748	677	745	794	633	1044	1040	976	646	607	650	761	728	752	649.6	1020	634	747	0.631	-0.665	-7.21	5.58649e-13	4.57545e-12	0.0013	0.011	0.0054	0.0054	TRUE	0.1726	0.744	-0.426	-4.732	2.22613e-06	9.54055e-06	0.0013	0.011	0.0054	0.0054	TRUE	0.1726
MD01G1022400	180	278	196	84	81	88	73	68	78	166	218	166	78	66	85	75	62	93	126.35	183	76	77	0.43	-1.218	-6.55	5.74025e-11	3.78121e-10	0.0179	0.021	0.0191	0.0191	TRUE	0.1544	0.429	-1.221	-6.428	1.28999e-10	9.66715e-10	0.0179	0.021	0.0191	0.0191	TRUE	0.1544
MD01G1022500	276	311	308	352	431	316	299	325	261	254	244	261	326	350	304	305	298	310	273.79	253	327	304	1.276	0.351	3.347	0.000816626	0.00198825	0	0.0143	0.0058	0.0058	TRUE	0.0817	1.184	0.244	2.37	0.0177907	0.0354981	0	0.0143	0.0058	0.0058	TRUE	0.0817
MD01G1022600	0	0	0	0	0	0	0	0	0	0	0	0	0	0	0	0	0	0	0	0	0	0	1	0	NA	NA	NA	NA	NA	NA	NA	NA	NA	1	0	NA	NA	NA	NA	NA	NA	NA	NA	NA
MD01G1022700	1340	1477	1598	1534	1824	1571	1095	1307	1068	1233	1159	1354	1422	1479	1509	1118	1198	1270	1179.98	1249	1470	1195	1.15	0.201	1.211	0.226048	0.301629	0.0379	0.0099	0.0266	0.0266	TRUE	0.6767	0.966	-0.049	-0.325	0.745313	0.80897	0.0379	0.0099	0.0266	0.0266	TRUE	0.6767
MD01G1022800	0	0	0	0	0	1	0	0	0	0	0	0	0	0	1	0	0	0	0.08	0	0	0	1.065	0.09	0.236	0.813237	NA	0	19.5408	12	12	TRUE	0.2449	1	0	0	1	NA	0	19.5408	12	12	TRUE	0.2449
MD01G1023000	34	40	46	0	0	0	0	0	0	31	31	39	0	0	0	0	0	0	8.47	34	0	0	0.009	-6.873	-6.105	1.03037e-09	5.92939e-09	0	0.1932	0.1287	0.1287	TRUE	0.0653	0.01	-6.683	-5.939	2.86209e-09	1.82909e-08	0	0.1932	0.1287	0.1287	TRUE	0.0653
MD01G1023100	12	20	9	18	10	14	13	12	14	11	16	8	17	8	13	13	11	17	12.84	12	13	14	1.053	0.075	0.286	0.774499	0.82825	0.0542	0.1304	0.0925	0.0925	TRUE	0.2989	1.077	0.108	0.484	0.628645	0.711166	0.0542	0.1304	0.0925	0.0925	TRUE	0.2989
MD01G1023200	17	29	24	13	5	10	10	6	7	16	23	20	12	4	10	10	6	8	15.3	20	9	8	0.54	-0.89	-2.781	0.00542648	0.0111797	0	0.1108	0.0641	0.0641	TRUE	0.4211	0.519	-0.946	-2.859	0.00424812	0.00989707	0	0.1108	0.0641	0.0641	TRUE	0.4211
MD01G1023300	0	0	0	0	0	0	0	0	0	0	0	0	0	0	0	0	0	0	0	0	0	0	1	0	NA	NA	NA	NA	NA	NA	NA	NA	NA	1	0	NA	NA	NA	NA	NA	NA	NA	NA	NA
MD01G1023400	0	0	0	2	4	1	15	11	14	0	0	0	2	3	1	15	10	17	9.59	0	2	14	4.717	2.238	2.763	0.00572699	0.0117373	0	0.1717	0.0987	0.0987	TRUE	0.1843	53.859	5.751	5.158	2.5007e-07	1.23656e-06	0	0.1717	0.0987	0.0987	TRUE	0.1843
MD01G1023500	0	0	0	0	0	0	4	3	0	0	0	0	0	0	0	4	3	0	0.65	0	0	2	1	0	0	1	NA	0	2.4319	4.2312	4.2312	TRUE	0.0255	1.597	0.675	1.408	0.159103	NA	0	2.4319	4.2312	4.2312	TRUE	0.0255
MD01G1023800	183	245	188	49	66	45	103	109	93	168	192	159	45	54	43	105	100	111	131.16	173	47	105	0.284	-1.817	-8.341	7.34291e-17	8.46159e-16	0.0264	0.0205	0.0242	0.0242	TRUE	0.4988	0.653	-0.615	-3.451	0.000559502	0.00158443	0.0264	0.0205	0.0242	0.0242	TRUE	0.4988
MD01G1023900	1057	1235	1228	1217	1564	1294	923	1138	783	973	969	1041	1128	1268	1243	943	1043	931	944.09	994	1213	972	1.205	0.269	2.357	0.0184136	0.0335685	0.0104	0.0103	0.0099	0.0099	TRUE	0.2302	0.981	-0.028	-0.257	0.796886	0.850021	0.0104	0.0103	0.0099	0.0099	TRUE	0.2302
MD01G1024000	2253	2305	2578	2386	3159	2268	2421	3118	2781	2074	1808	2185	2211	2562	2179	2472	2858	3306	2130.96	2022	2317	2879	1.135	0.182	1.505	0.132279	0.190018	0.0129	0.0094	0.0119	0.0119	TRUE	0.0614	1.38	0.464	3.896	9.76695e-05	0.000318532	0.0129	0.0094	0.0119	0.0119	TRUE	0.0614
MD01G1024100	400	449	442	0	0	0	54	59	71	368	352	375	0	0	0	55	54	84	116.51	365	0	64	0.001	-10.241	-9.357	8.16502e-21	1.25764e-19	0	0.022	0.0149	0.0149	TRUE	0.2877	0.177	-2.495	-13.733	6.4448e-43	3.53942e-41	0	0.022	0.0149	0.0149	TRUE	0.2877
MD01G1024200	72	75	75	189	241	231	182	193	151	66	59	64	175	195	222	186	177	179	113.81	63	197	181	3.079	1.622	9.94	2.79419e-23	5.14383e-22	0.002	0.0224	0.0109	0.0109	TRUE	0.3711	2.818	1.495	9.04	1.56026e-19	2.56273e-18	0.002	0.0224	0.0109	0.0109	TRUE	0.3711
MD01G1024400	1851	2171	1851	2338	2542	2214	2986	3561	2274	1704	1703	1569	2167	2062	2127	3049	3264	2703	1996.72	1659	2119	3005	1.267	0.341	4.06	4.9113e-05	0.000148257	0.0033	0.0094	0.005	0.005	TRUE	0.0466	1.793	0.843	9.912	3.70183e-23	7.63503e-22	0.0033	0.0094	0.005	0.005	TRUE	0.0466
MD01G1024500	4	1	3	4	0	2	5	1	2	4	1	3	4	0	2	5	1	2	2.03	3	2	3	0.941	-0.087	-0.28	0.779369	0.83224	0	0.7801	0.5588	0.5588	TRUE	0.1344	1.046	0.065	0.239	0.811487	0.862133	0	0.7801	0.5588	0.5588	TRUE	0.1344
MD01G1024600	63	121	87	83	121	80	91	106	89	58	95	74	77	98	77	93	97	106	76.67	76	84	99	1.091	0.126	0.732	0.464332	0.551185	0.0126	0.029	0.0193	0.0193	TRUE	0.1496	1.228	0.296	1.835	0.0664507	0.111841	0.0126	0.029	0.0193	0.0193	TRUE	0.1496
MD01G1024700	0	0	0	0	0	0	0	0	0	0	0	0	0	0	0	0	0	0	0	0	0	0	1	0	NA	NA	NA	NA	NA	NA	NA	NA	NA	1	0	NA	NA	NA	NA	NA	NA	NA	NA	NA
MD01G1024900	891	1148	1019	701	810	692	743	782	635	820	901	864	650	657	665	759	717	755	815.42	862	657	744	0.769	-0.378	-4.376	1.20626e-05	4.01656e-05	0.0026	0.0105	0.0046	0.0046	TRUE	0.0655	0.87	-0.201	-2.388	0.0169519	0.0340187	0.0026	0.0105	0.0046	0.0046	TRUE	0.0655
MD01G1025300	278	310	286	69	60	59	59	70	44	256	243	242	64	49	57	60	64	52	153.2	247	57	59	0.23	-2.117	-14.077	5.22296e-45	2.80236e-43	0	0.0188	0.0069	0.0069	TRUE	0.071	0.243	-2.039	-13.273	3.30391e-40	1.60839e-38	0	0.0188	0.0069	0.0069	TRUE	0.071
MD01G1025400	139	237	156	51	57	40	64	52	36	128	186	132	47	46	38	65	48	43	285.09	149	44	52	0.305	-1.711	-8.288	1.14812e-16	1.30132e-15	0.0233	0.0141	0.0194	0.0194	TRUE	0.0415	0.362	-1.467	-7.175	7.24303e-13	6.87958e-12	0.0233	0.0141	0.0194	0.0194	TRUE	0.0415
MD01G1025500	55	76	70	18	26	22	33	38	27	51	60	59	17	21	21	34	35	32	28.38	57	20	34	0.373	-1.421	-5.415	6.12434e-08	2.82086e-07	0	0.0637	0.0269	0.0269	TRUE	0.3304	0.664	-0.592	-2.862	0.00421525	0.00983216	0	0.0637	0.0269	0.0269	TRUE	0.3304
MD01G1025600	1	1	0	0	0	0	0	0	0	1	1	0	0	0	0	0	0	0	0.14	1	0	0	0.896	-0.158	-0.408	0.683146	NA	0	11.0134	12	12	TRUE	0.1224	0.913	-0.131	-0.361	0.71844	NA	0	11.0134	12	12	TRUE	0.1224
MD01G1025800	96	133	108	155	168	139	160	148	127	88	104	92	144	136	134	163	136	151	132.26	95	138	150	1.41	0.496	3.696	0.000219443	0.000593704	0	0.0204	0.0075	0.0075	TRUE	0.0411	1.516	0.6	4.49	7.1073e-06	2.81409e-05	0	0.0204	0.0075	0.0075	TRUE	0.0411
MD01G1025900	0	0	0	0	0	0	1	1	0	0	0	0	0	0	0	1	1	0	0.42	0	0	1	1	0	0	1	NA	0	3.7417	3.6867	3.6867	TRUE	0.0698	1.218	0.285	0.753	0.451159	NA	0	3.7417	3.6867	3.6867	TRUE	0.0698
MD01G1026000	53	76	64	0	0	1	0	0	0	49	60	54	0	0	1	0	0	0	17.89	54	0	0	0.01	-6.664	-6.106	1.02026e-09	5.8721e-09	0	0.096	0.0506	0.0506	TRUE	0.2379	0.006	-7.378	-6.728	1.71787e-11	1.42039e-10	0	0.096	0.0506	0.0506	TRUE	0.2379
MD01G1026100	1	0	1	0	0	1	1	0	0	1	0	1	0	0	1	1	0	0	0.31	1	0	0	0.927	-0.109	-0.287	0.773734	NA	0	5.0123	4.7317	4.7317	TRUE	0.2449	0.948	-0.077	-0.218	0.827423	NA	0	5.0123	4.7317	4.7317	TRUE	0.2449
MD01G1026200	222	268	254	146	196	145	100	132	78	204	210	215	135	159	139	102	121	93	126.4	210	144	105	0.716	-0.481	-3.123	0.00178811	0.00406304	0.0097	0.021	0.0162	0.0162	TRUE	0.5852	0.525	-0.929	-5.527	3.25979e-08	1.81809e-07	0.0097	0.021	0.0162	0.0162	TRUE	0.5852
MD01G1026300	204	234	215	182	214	209	115	150	95	188	184	182	169	174	201	117	138	113	139.55	185	181	123	0.982	-0.027	-0.21	0.833804	0.877106	0	0.0198	0.0091	0.0091	TRUE	0.1045	0.694	-0.526	-3.967	7.27924e-05	0.000242772	0	0.0198	0.0091	0.0091	TRUE	0.1045
MD01G1026400	203	245	219	223	241	217	192	251	187	187	192	186	207	195	208	196	230	222	189.31	188	203	216	1.075	0.104	0.912	0.361963	0.448963	0	0.0169	0.0062	0.0062	TRUE	0.0553	1.132	0.179	1.624	0.104373	0.164436	0	0.0169	0.0062	0.0062	TRUE	0.0553
MD01G1026600	2	0	1	2	7	5	0	0	0	2	0	1	2	6	5	0	0	0	1.25	1	4	0	1.557	0.638	1.458	0.144821	0.205423	0	1.2576	1.1036	1.1036	TRUE	0.1844	0.732	-0.45	-1.158	0.246767	0.337984	0	1.2576	1.1036	1.1036	TRUE	0.1844
MD01G1027000	558	692	623	869	975	888	758	832	597	514	543	528	805	791	853	774	763	710	589.14	528	816	749	1.529	0.613	7.998	1.26653e-15	1.3152e-14	0	0.0113	0.0031	0.0031	TRUE	0.0117	1.401	0.487	6.335	2.3731e-10	1.723e-09	0	0.0113	0.0031	0.0031	TRUE	0.0117
MD01G1027200	0	0	0	1	2	2	1	1	2	0	0	0	1	2	2	1	1	2	1.4	0	2	1	2.363	1.241	2.056	0.0397638	0.0665616	0	1.1259	0.5046	0.5046	TRUE	0.0565	2.125	1.087	1.962	0.0498164	0.0873573	0	1.1259	0.5046	0.5046	TRUE	0.0565
MD01G1027300	0	0	0	0	0	0	0	0	0	0	0	0	0	0	0	0	0	0	0	0	0	0	1	0	NA	NA	NA	NA	NA	NA	NA	NA	NA	1	0	NA	NA	NA	NA	NA	NA	NA	NA	NA
MD01G1027400	2460	2893	2454	3238	3917	3127	2462	2853	1735	2264	2269	2080	3001	3177	3004	2514	2615	2062	2059.65	2204	3061	2397	1.368	0.452	4.433	9.29876e-06	3.15041e-05	0.0072	0.0094	0.0079	0.0079	TRUE	0.0897	1.08	0.112	1.135	0.256345	0.348668	0.0072	0.0094	0.0079	0.0079	TRUE	0.0897
MD01G1027500	3	0	1	1	2	4	10	11	5	3	0	1	1	2	4	10	10	6	3.1	1	2	9	1.192	0.254	0.776	0.43798	0.525542	0	0.5137	0.3266	0.3266	TRUE	0.39	3.803	1.927	2.868	0.00413493	0.00966901	0	0.5137	0.3266	0.3266	TRUE	0.39
MD01G1027600	214	282	232	252	268	232	189	198	146	197	221	197	234	217	223	193	182	174	191.74	205	225	183	1.087	0.121	1.011	0.311801	0.396314	0.0015	0.0168	0.0078	0.0078	TRUE	0.1297	0.904	-0.146	-1.25	0.211422	0.297428	0.0015	0.0168	0.0078	0.0078	TRUE	0.1297
MD01G1027700	22	20	19	16	16	12	29	38	30	20	16	16	15	13	12	30	35	36	22.76	17	13	34	0.83	-0.27	-1.132	0.257583	0.337194	0	0.0773	0.0298	0.0298	TRUE	0.0541	1.675	0.744	3.047	0.0023114	0.00573161	0	0.0773	0.0298	0.0298	TRUE	0.0541
MD01G1027800	47	60	34	24	22	25	13	19	18	43	47	29	22	18	24	13	17	21	20.08	40	21	17	0.621	-0.687	-2.665	0.00770224	0.0153551	0.0188	0.0865	0.0506	0.0506	TRUE	0.2315	0.508	-0.978	-3.381	0.000721413	0.00199403	0.0188	0.0865	0.0506	0.0506	TRUE	0.2315
MD01G1027900	0	2	2	0	0	0	0	1	0	0	2	2	0	0	0	0	1	0	0.53	1	0	0	0.686	-0.544	-1.213	0.225052	NA	0	2.9584	2.2766	2.2766	TRUE	0.205	0.843	-0.246	-0.694	0.487474	NA	0	2.9584	2.2766	2.2766	TRUE	0.205
MD01G1028100	441	539	511	456	759	420	415	495	369	406	423	433	423	616	403	424	454	439	469.4	421	481	439	1.131	0.177	1.337	0.181113	0.24927	0.0132	0.012	0.0133	0.0133	TRUE	0.3582	1.037	0.052	0.415	0.677906	0.753117	0.0132	0.012	0.0133	0.0133	TRUE	0.3582
MD01G1028300	741	859	870	1494	1784	1498	1047	1253	939	682	674	737	1385	1447	1439	1069	1149	1116	875.49	698	1424	1111	2.026	1.019	14.048	7.87252e-45	4.1998e-43	0	0.0104	0.0029	0.0029	TRUE	0.0148	1.577	0.657	9	2.26511e-19	3.68847e-18	0	0.0104	0.0029	0.0029	TRUE	0.0148
MD01G1028400	2	0	0	0	0	0	1	1	0	2	0	0	0	0	0	1	1	0	0.54	1	0	1	0.812	-0.3	-0.758	0.44818	NA	0	2.887	2.5875	2.5875	TRUE	0.4874	1.015	0.021	0.064	0.94918	NA	0	2.887	2.5875	2.5875	TRUE	0.4874
MD01G1028500	156	171	156	498	576	445	514	624	362	144	134	132	462	467	427	525	572	430	393.49	137	452	509	3.273	1.71	13.421	4.55256e-41	2.11941e-39	0.0057	0.0126	0.0078	0.0078	TRUE	0.1029	3.699	1.887	14.761	2.62511e-49	1.76062e-47	0.0057	0.0126	0.0078	0.0078	TRUE	0.1029
MD01G1028600	1	0	0	1	0	0	0	0	0	1	0	0	1	0	0	0	0	0	0.15	0	0	0	1.005	0.007	0.018	0.985609	NA	0	10.1659	12	12	TRUE	0.251	0.963	-0.055	-0.153	0.87841	NA	0	10.1659	12	12	TRUE	0.251
MD01G1028700	0	2	3	3	8	3	2	6	8	0	2	3	3	6	3	2	6	10	4.05	2	4	6	1.498	0.583	1.525	0.127326	0.183931	0.2696	0.3948	0.3335	0.3335	TRUE	0.1186	1.813	0.859	1.993	0.0462548	0.0819325	0.2696	0.3948	0.3335	0.3335	TRUE	0.1186
MD01G1028800	12	19	15	9	9	9	2	9	9	11	15	13	8	7	9	2	8	11	10.73	13	8	7	0.759	-0.399	-1.429	0.152979	0.215471	0	0.1543	0.0751	0.0751	TRUE	0.5035	0.711	-0.492	-1.798	0.072223	0.120135	0	0.1543	0.0751	0.0751	TRUE	0.5035
MD01G1028900	8	8	6	3	4	3	5	2	3	7	6	5	3	3	3	5	2	4	4.23	6	3	4	0.715	-0.484	-1.457	0.145233	0.205921	0	0.3784	0.1664	0.1664	TRUE	0.2447	0.801	-0.321	-1.161	0.245489	0.336604	0	0.3784	0.1664	0.1664	TRUE	0.2447
MD01G1029000	1360	1548	1445	1911	1846	1719	1359	1575	1063	1252	1214	1225	1771	1497	1651	1388	1444	1264	1209.68	1230	1640	1365	1.319	0.399	4.445	8.80927e-06	2.99505e-05	0.0038	0.0099	0.0056	0.0056	TRUE	0.0435	1.103	0.141	1.608	0.107842	0.169103	0.0038	0.0099	0.0056	0.0056	TRUE	0.0435
MD01G1029100	3275	4241	3354	2535	3144	2598	2672	3218	1720	3015	3327	2843	2349	2550	2496	2729	2950	2045	2205.3	3062	2465	2575	0.817	-0.292	-2.473	0.0134098	0.0252716	0.0108	0.0093	0.0112	0.0112	TRUE	0.1952	0.857	-0.223	-1.969	0.0489	0.0859606	0.0108	0.0093	0.0112	0.0112	TRUE	0.1952
MD01G1029200	3	4	5	6	4	5	11	7	5	3	3	4	6	3	5	11	6	6	34.4	3	5	8	1.141	0.191	0.677	0.498153	0.584081	0	0.0541	0.0312	0.0312	TRUE	0.1625	1.636	0.71	2.201	0.0277252	0.0524223	0	0.0541	0.0312	0.0312	TRUE	0.1625
MD01G1029300	29	46	44	12	7	13	8	11	17	27	36	37	11	6	12	8	10	20	27.16	33	10	13	0.324	-1.625	-4.684	2.81972e-06	1.03055e-05	0.0201	0.0662	0.0469	0.0469	TRUE	0.4391	0.432	-1.21	-3.787	0.000152185	0.000480643	0.0201	0.0662	0.0469	0.0469	TRUE	0.4391
MD01G1029500	38	37	40	26	13	23	22	18	14	35	29	34	24	11	22	22	17	17	27.19	33	19	19	0.654	-0.613	-2.51	0.0120812	0.023005	0	0.0661	0.0366	0.0366	TRUE	0.4777	0.668	-0.582	-2.476	0.0132716	0.0273773	0	0.0661	0.0366	0.0366	TRUE	0.4777
MD01G1029700	1534	1777	1732	2441	2912	2456	1983	2269	1653	1412	1394	1468	2262	2362	2359	2025	2080	1965	1970.06	1425	2328	2023	1.617	0.693	8.721	2.75283e-18	3.54343e-17	0.0028	0.0094	0.0043	0.0043	TRUE	0.0628	1.402	0.488	6.195	5.84401e-10	4.05967e-09	0.0028	0.0094	0.0043	0.0043	TRUE	0.0628
MD01G1029800	447	553	440	463	526	453	396	477	271	411	434	373	429	427	435	404	437	322	423.24	406	430	388	1.055	0.077	0.656	0.511941	0.597355	0.0081	0.0123	0.0095	0.0095	TRUE	0.1212	0.963	-0.055	-0.483	0.628775	0.711291	0.0081	0.0123	0.0095	0.0095	TRUE	0.1212
MD01G1029900	4	2	5	0	0	0	1	1	0	4	2	4	0	0	0	1	1	0	1.38	3	0	1	0.185	-2.436	-2.746	0.00603765	0.0123151	0	1.1429	0.5938	0.5938	TRUE	0.171	0.643	-0.637	-1.541	0.123335	0.189328	0	1.1429	0.5938	0.5938	TRUE	0.171
MD01G1030100	698	815	678	986	1273	902	742	751	539	643	639	575	914	1032	866	758	688	641	699.08	619	937	696	1.487	0.573	5.292	1.2113e-07	5.34677e-07	0.0065	0.0109	0.0081	0.0081	TRUE	0.0827	1.113	0.154	1.475	0.140236	0.210922	0.0065	0.0109	0.0081	0.0081	TRUE	0.0827
MD01G1030300	30	32	42	18	23	15	49	76	49	28	25	36	17	19	14	50	70	58	45.88	30	17	59	0.664	-0.591	-2.255	0.0241408	0.0427613	0.0623	0.0427	0.0544	0.0544	TRUE	0.0651	1.736	0.796	3.092	0.00198931	0.0050055	0.0623	0.0427	0.0544	0.0544	TRUE	0.0651
MD01G1030500	0	0	0	0	0	0	0	1	0	0	0	0	0	0	0	0	1	0	0.08	0	0	0	1	0	0	1	NA	0	20.4757	12	12	TRUE	0.1613	1.074	0.103	0.283	0.77683	NA	0	20.4757	12	12	TRUE	0.1613
MD01G1030600	27	27	33	12	14	13	40	49	29	25	21	28	11	11	12	41	45	34	22.75	25	11	40	0.552	-0.857	-3.117	0.00182675	0.0041415	0	0.0774	0.0309	0.0309	TRUE	0.0553	1.437	0.523	2.442	0.0145927	0.0297682	0	0.0774	0.0309	0.0309	TRUE	0.0553
MD01G1030700	0	0	0	2	0	0	0	0	0	0	0	0	2	0	0	0	0	0	0.15	0	1	0	1.13	0.177	0.453	0.650218	NA	0	10.1318	12	12	TRUE	0.4871	1	0	0	1	NA	0	10.1318	12	12	TRUE	0.4871
MD01G1030800	34	56	34	16	21	21	10	16	6	31	44	29	15	17	20	10	15	7	18.95	35	17	11	0.586	-0.771	-2.834	0.00460253	0.00963067	0	0.0911	0.0527	0.0527	TRUE	0.2173	0.356	-1.49	-4.245	2.18668e-05	7.99659e-05	0	0.0911	0.0527	0.0527	TRUE	0.2173
MD01G1030900	271	307	271	138	176	171	139	165	131	249	241	230	128	143	164	142	151	156	155.11	240	145	150	0.629	-0.669	-4.448	8.67813e-06	2.95262e-05	0.0105	0.0187	0.0144	0.0144	TRUE	0.3497	0.655	-0.612	-4.127	3.67189e-05	0.000129199	0.0105	0.0187	0.0144	0.0144	TRUE	0.3497
MD01G1031100	355	408	409	297	354	316	298	381	272	327	320	347	275	287	304	304	349	323	330.31	331	289	325	0.885	-0.176	-1.177	0.239368	0.31683	0.0189	0.0134	0.0176	0.0176	TRUE	0.3053	0.987	-0.019	-0.139	0.88909	0.921563	0.0189	0.0134	0.0176	0.0176	TRUE	0.3053
MD01G1031200	386	521	492	452	537	405	461	505	345	355	409	417	419	436	389	471	463	410	414.03	394	415	448	1.05	0.071	0.735	0.462097	0.54915	0.0019	0.0124	0.0051	0.0051	TRUE	0.0409	1.128	0.173	1.85	0.0643187	0.108738	0.0019	0.0124	0.0051	0.0051	TRUE	0.0409
MD01G1031300	914	1010	844	1225	1342	1229	1376	1369	1196	841	792	715	1135	1088	1181	1405	1255	1422	985.65	783	1135	1361	1.402	0.488	3.41	0.00064872	0.00161132	0.0191	0.0102	0.0168	0.0168	TRUE	0.3777	1.668	0.738	5.08	3.78355e-07	1.8205e-06	0.0191	0.0102	0.0168	0.0168	TRUE	0.3777
MD01G1031400	40	54	45	29	44	41	18	35	19	37	42	38	27	36	39	18	32	23	31.8	39	34	24	0.897	-0.156	-0.76	0.447085	0.534678	0	0.0578	0.0282	0.0282	TRUE	0.2624	0.712	-0.49	-2.329	0.0198651	0.0391155	0	0.0578	0.0282	0.0282	TRUE	0.2624
MD01G1031700	0	1	1	2	2	5	5	2	3	0	1	1	2	2	5	5	2	4	4	1	3	4	1.807	0.853	1.817	0.0692791	0.108174	0	0.4	0.207	0.207	TRUE	0.2513	2.151	1.105	2.113	0.0345652	0.0635978	0	0.4	0.207	0.207	TRUE	0.2513
MD01G1032000	95	125	103	133	138	92	80	103	68	87	98	87	123	112	88	82	94	81	86.34	91	108	86	1.162	0.216	1.387	0.165313	0.230303	0	0.0267	0.0139	0.0139	TRUE	0.1204	0.955	-0.067	-0.453	0.650382	0.729736	0	0.0267	0.0139	0.0139	TRUE	0.1204
MD01G1032200	751	954	810	711	822	749	686	689	547	691	748	686	659	667	719	701	632	650	770.47	708	682	661	0.963	-0.055	-0.637	0.524384	0.609056	0.0025	0.0107	0.0046	0.0046	TRUE	0.0428	0.936	-0.096	-1.121	0.26231	0.35524	0.0025	0.0107	0.0046	0.0046	TRUE	0.0428
[truncated: 43,285 more rows]
