# Supplementary material for: De novo transcriptome assembly and functional analysis reveal a dihydrochalcone 3-hydroxylase(DHC3H) of wild Malus species that produces sieboldin in vivo
Source: Front Plant Sci. 2022 Dec 16;13:1072765. doi: 10.3389/fpls.2022.1072765 (PMC9800874; doi:10.3389/fpls.2022.1072765)
Supplement: Supplementary file 13 [file Table_6.xlsx]

## Sheet: Sheet1
Supplementary Table 6. Functional annotation of top DEGs obtained from de novo transcriptome assembly of Malus species
Gene_ID_Toringo	Gene_Annotation_Toringo	Gene_ID_Micromalus	Gene_Annotation_Micromalus		Micromalus vs GD		Toringo vs GD
				Gene_ID_GD	log2FC	padj	log2FC	padj	Gene_Annotation_M_domestica
TRINITY_DN1355_c2_g1_i1.p1	hypothetical protein DVH24_000806 [Malus domestica]	TRINITY_DN1565_c0_g1_i1.p1	hypothetical protein DVH24_000806 [Malus domestica]	MD04G1018200	9.202	2.05456e-102	12.213	9.03749e-180	dehydration-responsive protein RD22-like [Malus domestica];dehydration-responsive protein RD22-like isoform X4 [Pyrus x bretschneideri];dehydration-responsive protein RD22-like isoform X3 [Pyrus x bretschneideri]
TRINITY_DN11086_c0_g2_i5.p1	patatin-like protein 2 [Malus domestica]	TRINITY_DN6531_c0_g1_i1.p1	patatin-like protein 2 [Malus domestica]	MD15G1085500	10.514	2.47706e-37	10.994	1.31916e-40	patatin-like protein 2 [Pyrus x bretschneideri, Prunus mume, Malus domestica];hypothetical protein PRUPE_ppa019532mg [Prunus persica];hypothetical protein PRUPE_ppa015844mg [Prunus persica]
TRINITY_DN74008_c0_g1_i1.p1	caffeic acid 3-O-methyltransferase-like [Pyrus ussuriensis x Pyrus communis]	TRINITY_DN1040_c3_g1_i1.p1	caffeic acid 3-O-methyltransferase-like [Pyrus ussuriensis x Pyrus communis]	MD00G1100700	10.439	2.10908e-20	10.721	2.38056e-21	caffeic acid 3-O-methyltransferase-like [Malus domestica];hypothetical protein PRUPE_ppa019499mg [Prunus persica];hypothetical protein PRUPE_ppa019437mg [Prunus persica]
TRINITY_DN4008_c1_g1_i1.p1	11-beta-hydroxysteroid dehydrogenase-like 4A [Pyrus ussuriensis x Pyrus communis]	TRINITY_DN15967_c0_g1_i3.p1	11-beta-hydroxysteroid dehydrogenase-like 4A [Pyrus ussuriensis x Pyrus communis]	MD14G1152900	9.285	1.97454e-16	10.243	1.65999e-19	11-beta-hydroxysteroid dehydrogenase-like 4A [Pyrus x bretschneideri, Prunus mume];hypothetical protein PRUPE_ppa022641mg [Prunus persica];hypothetical protein POPTR_0015s11200g [Populus trichocarpa]
TRINITY_DN6470_c0_g1_i1.p1	hypothetical protein DVH24_034775 [Malus domestica]	TRINITY_DN1867_c0_g1_i1.p1	hypothetical protein DVH24_034775 [Malus domestica]	MD05G1155100	10.126	4.55922e-95	10.176	6.23788e-96	2-isopropylmalate synthase A-like [Vitis vinifera, Nelumbo nucifera, Pyrus x bretschneideri, Malus domestica];2-isopropylmalate synthase 2, chloroplastic-like [Cucumis melo, Cucumis sativus];LOW QUALITY PROTEIN: 2-isopropylmalate synthase 2, chloroplastic-like [Pyrus x bretschneideri]
TRINITY_DN3597_c0_g1_i1.p1	hypothetical protein C1H46_035295 [Malus baccata]	TRINITY_DN46026_c0_g1_i1.p1	hypothetical protein C1H46_035295 [Malus baccata]	MD00G1165300	9.419	2.52699e-38	9.379	6.34396e-38	extradiol ring-cleavage dioxygenase-like [Malus domestica];hypothetical protein PRUPE_ppa009849mg [Prunus persica];extradiol ring-cleavage dioxygenase [Prunus mume]
TRINITY_DN20364_c0_g1_i2.p1	L-type lectin-domain containing receptor kinase IX.1-like [Malus domestica]	TRINITY_DN15307_c0_g1_i1.p1	L-type lectin-domain containing receptor kinase IX.1-like [Malus domestica]	MD08G1053400	8.667	1.36713e-14	9.25	2.80948e-16	L-type lectin-domain containing receptor kinase IX.1-like, partial [Malus domestica];L-type lectin-domain containing receptor kinase IX.1-like [Malus domestica];uncharacterized protein LOC101491058 [Cicer arietinum]
TRINITY_DN7940_c0_g1_i1.p1	hypothetical protein DVH24_040732 [Malus domestica]	TRINITY_DN53533_c0_g1_i1.p1	uncharacterized protein LOC103452339 [Malus domestica]	MD13G1077000	5.667	6.39697e-07	9.013	2.12109e-15	uncharacterized protein LOC103452339 [Malus domestica];polyvinylalcohol dehydrogenase-like [Fragaria vesca subsp. vesca];hypothetical protein L484_021105 [Morus notabilis]
TRINITY_DN7883_c0_g1_i2.p1	hypothetical protein DVH24_035190 [Malus domestica]	TRINITY_DN21714_c0_g1_i2.p1	hypothetical protein DVH24_035190 [Malus domestica]	MD09G1244200	8.148	5.90955e-13	8.875	5.68409e-15	squamosa promoter-binding-like protein 3 [Prunus mume, Malus domestica];hypothetical protein PRUPE_ppa011968mg [Prunus persica];squamosa promoter-binding protein 1-like [Malus domestica]
TRINITY_DN14631_c0_g1_i13.p1	hypothetical protein C1H46_011126 [Malus baccata]	TRINITY_DN36534_c0_g1_i5.p1	PREDICTED: protein ACCELERATED CELL DEATH 6-like [Pyrus x bretschneideri]	MD03G1094200	8.812	5.8925e-15	8.781	9.6281e-15	ankyrin-3-like [Pyrus x bretschneideri];ankyrin repeat-containing protein At5g02620-like [Pyrus x bretschneideri];ankyrin repeat-containing protein At3g12360-like isoform X2 [Pyrus x bretschneideri]
TRINITY_DN1619_c1_g1_i1.p1	hypothetical protein C1H46_016546 [Malus baccata]	TRINITY_DN1859_c1_g1_i2.p1	hypothetical protein C1H46_016546 [Malus baccata]	MD08G1185700	8.487	5.50459e-14	7.798	6.47069e-12	UDP-glycosyltransferase 85A2-like [Prunus mume, Malus domestica];7-deoxyloganetin glucosyltransferase-like [Pyrus x bretschneideri];hypothetical protein PRUPE_ppa015357mg [Prunus persica]
TRINITY_DN10776_c0_g1_i1.p1	hypothetical protein C1H46_027182 [Malus baccata]	TRINITY_DN69818_c0_g1_i1.p1	hypothetical protein C1H46_027182 [Malus baccata]	MD11G1171900	8.909	2.38756e-15	8.62	2.34124e-14	secoisolariciresinol dehydrogenase-like [Pyrus x bretschneideri, Prunus mume];hypothetical protein PRUPE_ppa020955mg [Prunus persica];hypothetical protein PRUPE_ppa017863mg [Prunus persica]
TRINITY_DN26849_c0_g1_i1.p1	hypothetical protein C1H46_006628 [Malus baccata]	TRINITY_DN45423_c0_g1_i1.p1	hypothetical protein C1H46_006628 [Malus baccata]	MD17G1110900	7.413	9.02926e-11	8.537	1.02591e-13	exopolygalacturonase clone GBGA483-like [Prunus mume, Malus domestica];LOW QUALITY PROTEIN: exopolygalacturonase clone GBGA483-like [Fragaria vesca subsp. vesca];exopolygalacturonase [Eucalyptus grandis]
TRINITY_DN3953_c0_g1_i9.p1	laccase-12-like [Malus domestica]	TRINITY_DN9185_c0_g1_i9.p1	laccase-12-like [Malus domestica]	MD07G1227900	5.741	2.97624e-37	8.092	6.75901e-74	laccase-12-like [Prunus mume, Malus domestica];hypothetical protein PRUPE_ppa003349mg [Prunus persica];laccase-5-like [Pyrus x bretschneideri]
TRINITY_DN12516_c0_g2_i1.p1	hypothetical protein C1H46_020077 [Malus baccata]	TRINITY_DN17234_c1_g1_i1.p1	hypothetical protein C1H46_020077 [Malus baccata]	MD05G1095600	8.585	2.60188e-14	7.615	1.80034e-11	receptor-like protein 12 [Pyrus x bretschneideri, Malus domestica];hypothetical protein PRUPE_ppa026755mg [Prunus persica];receptor-like protein 12-like [Glycine max]
TRINITY_DN1694_c0_g1_i6.p1	hypothetical protein C1H46_043331 [Malus baccata]	TRINITY_DN1985_c0_g2_i2.p1	clavaminate synthase-like protein At3g21360 [Malus domestica]	MD10G1294700	5.953	4.34699e-224	7.514	0	clavaminate synthase-like protein At3g21360 [Pyrus x bretschneideri, Malus domestica];clavaminate synthase-like protein At3g21360-like [Fragaria vesca subsp. vesca];hypothetical protein PRUPE_ppa008628mg [Prunus persica]
TRINITY_DN34467_c0_g1_i1.p1	putative gamma-glutamylcyclotransferase At3g02910 [Malus domestica]<>hypothetical protein DVH24_025071 [Malus domestica]	TRINITY_DN46775_c0_g1_i1.p1	putative gamma-glutamylcyclotransferase At3g02910 [Malus domestica]<>hypothetical protein DVH24_025071 [Malus domestica]	MD07G1310600	6.852	3.46672e-09	6.518	2.48455e-08	putative gamma-glutamylcyclotransferase At3g02910 [Pyrus x bretschneideri, Prunus mume, Malus domestica];hypothetical protein PRUPE_ppa025401mg [Prunus persica];AIG2-like (avirulence induced gene) family protein [Theobroma cacao]
TRINITY_DN10183_c0_g1_i2.p1	hypothetical protein C1H46_023764 [Malus baccata]	TRINITY_DN1412_c3_g1_i1.p1	hypothetical protein C1H46_023764 [Malus baccata]	MD14G1224600	6.127	8.00171e-111	6.98	3.27797e-144	cytochrome P450 CYP736A12-like [Pyrus x bretschneideri, Prunus mume, Malus domestica];hypothetical protein PRUPE_ppa004377mg [Prunus persica];cytochrome P450 71A1-like [Fragaria vesca subsp. vesca]
TRINITY_DN7989_c0_g1_i3.p1	annexin-like protein RJ4 isoform X3 [Malus domestica]	TRINITY_DN24692_c0_g1_i1.p1	annexin-like protein RJ4 isoform X3 [Malus domestica]	MD07G1036200	3.653	2.07878e-08	6.831	2.37587e-27	LOW QUALITY PROTEIN: annexin-like protein RJ4 [Malus domestica];annexin-like protein RJ4 isoform X1 [Malus domestica];annexin-like protein RJ4 [Pyrus x bretschneideri]
TRINITY_DN27891_c0_g1_i1.p1	uncharacterized protein LOC108174052 isoform X1 [Malus domestica]	TRINITY_DN18592_c0_g1_i4.p1	replication protein A 70 kDa DNA-binding subunit isoform X1 [Malus domestica]<>replication protein A 70 kDa DNA-binding subunit isoform X1 [Malus domestica]<>replication protein A 70 kDa DNA-binding subunit isoform X1 [Malus domestica]<>replication protein A 70 kDa DNA-binding subunit isoform X1 [Malus domestica]<>replication protein A 70 kDa DNA-binding subunit isoform X1 [Malus domestica]<>repl…	MD04G1002000	6.411	1.62185e-08	5.123	8.24024e-06	replication protein A 70 kDa DNA-binding subunit B-like [Malus domestica];uncharacterized protein LOC103941170 [Pyrus x bretschneideri];uncharacterized protein LOC103962128 [Pyrus x bretschneideri]
TRINITY_DN4834_c0_g1_i1.p1	licodione synthase-like [Malus domestica]	TRINITY_DN11747_c0_g1_i2.p1	licodione synthase-like [Malus domestica]	MD11G1115200	7.075	0	6.5	0	LOW QUALITY PROTEIN: licodione synthase-like [Malus domestica];licodione synthase-like [Malus domestica, Fragaria vesca subsp. vesca];hypothetical protein PRUPE_ppa025750mg [Prunus persica]
TRINITY_DN928_c0_g1_i2.p1	hypothetical protein C1H46_031790 [Malus baccata]	TRINITY_DN1183_c0_g1_i1.p1	hypothetical protein C1H46_031790 [Malus baccata]	MD06G1131600	5.647	0	6.426	0	lysosomal alpha-mannosidase-like isoform X1 [Pyrus x bretschneideri];lysosomal alpha-mannosidase-like isoform X2 [Pyrus x bretschneideri];lysosomal alpha-mannosidase-like [Pyrus x bretschneideri]
TRINITY_DN80111_c0_g1_i1.p1	hypothetical protein C1H46_013381 [Malus baccata]	TRINITY_DN62467_c0_g1_i1.p1	hypothetical protein C1H46_013381 [Malus baccata]	MD00G1115400	6.262	1.01889e-09	2.476	0.00480673	uncharacterized protein ECU03_1610-like [Malus domestica];late embryogenesis abundant protein, group 3-like isoform X1 [Pyrus x bretschneideri];embryonic protein DC-8-like [Malus domestica]
TRINITY_DN1709_c0_g2_i1.p1	ornithine decarboxylase [Malus hupehensis]	TRINITY_DN52511_c0_g1_i1.p1	ornithine decarboxylase [Malus hupehensis]	MD05G1034000	6.194	3.20713e-07	5.696	3.25793e-06	ornithine decarboxylase-like [Pyrus x bretschneideri, Prunus mume, Malus domestica];LOW QUALITY PROTEIN: ornithine decarboxylase-like [Prunus mume, Malus domestica];hypothetical protein PRUPE_ppa007845mg [Prunus persica]
TRINITY_DN5583_c0_g1_i1.p1	hypothetical protein C1H46_006479 [Malus baccata]	TRINITY_DN6447_c0_g1_i1.p1	hypothetical protein C1H46_006484 [Malus baccata]	MD05G1007600	6.126	8.1231e-31	6.3	1.79453e-32	uncharacterized protein LOC103956546 isoform X2 [Pyrus x bretschneideri];uncharacterized protein LOC103956546 isoform X1 [Pyrus x bretschneideri];uncharacterized protein LOC103956544 [Pyrus x bretschneideri]
TRINITY_DN39285_c0_g1_i3.p1	hypothetical protein C1H46_009191 [Malus baccata]	TRINITY_DN4877_c1_g1_i3.p1	hypothetical protein C1H46_009191 [Malus baccata]	MD08G1044800	6.045	1.28891e-07	6.46	1.9039e-08	crooked neck-like protein 1 [Pyrus x bretschneideri];LOW QUALITY PROTEIN: crooked neck-like protein 1, partial [Malus domestica];crooked neck-like protein 1, partial [Malus domestica]
TRINITY_DN30124_c0_g1_i1.p1	homeobox protein knotted-1-like 6 [Malus domestica]<>knotted1-like homeobox [Malus domestica]	TRINITY_DN16647_c0_g1_i4.p1	transcription factor KNAT6 [Malus domestica]	MD16G1097200	6.026	1.68002e-12	5.225	1.49102e-09	homeobox protein knotted-1-like 6 [Prunus mume, Malus domestica];homeobox protein knotted-1-like 6-like [Fragaria vesca subsp. vesca];KNOTTED1-like homeobox gene 6 [Theobroma cacao]
TRINITY_DN27521_c0_g1_i2.p1	hypothetical protein C1H46_022192 [Malus baccata]	TRINITY_DN8206_c0_g1_i1.p1	hypothetical protein C1H46_022192 [Malus baccata]	MD10G1337400	5.948	1.9725e-07	5.25	5.433e-06	pentatricopeptide repeat-containing protein At4g16390, chloroplastic [Pyrus x bretschneideri, Prunus mume, Malus domestica];hypothetical protein PRUPE_ppa002169mg [Prunus persica];LOW QUALITY PROTEIN: pentatricopeptide repeat-containing protein At4g16390, chloroplastic-like [Pyrus x bretschneideri]
TRINITY_DN10067_c0_g1_i1.p1	PREDICTED: protein CHUP1, chloroplastic-like isoform X1 [Pyrus x bretschneideri]	TRINITY_DN20575_c0_g1_i1.p1	PREDICTED: protein CHUP1, chloroplastic-like isoform X1 [Pyrus x bretschneideri]	MD06G1210200	4.723	4.16728e-42	6.153	3.80337e-72	protein CHUP1, chloroplastic-like [Malus domestica];protein CHUP1, chloroplastic-like isoform X1 [Pyrus x bretschneideri];protein CHUP1, chloroplastic-like isoform X2 [Pyrus x bretschneideri]
TRINITY_DN3752_c0_g1_i2.p1	peroxidase P7-like [Malus domestica]	TRINITY_DN14891_c0_g1_i1.p1	peroxidase P7-like [Malus domestica]	MD17G1265300	1.167	1.50225e-08	6.078	6.17469e-223	peroxidase P7-like [Pyrus x bretschneideri, Prunus mume, Malus domestica];hypothetical protein PRUPE_ppa008808mg [Prunus persica];peroxidase 52-like [Fragaria vesca subsp. vesca]
TRINITY_DN46648_c0_g1_i1.p1	MLP-like protein 31 [Malus domestica]	TRINITY_DN8599_c0_g1_i3.p2	hypothetical protein C1H46_037940 [Malus baccata]	MD16G1024100	9.309	1.44753e-16	5.952	1.74313e-07	MLP-like protein 31 [Malus domestica];MLP-like protein 43 [Vitis vinifera];ripening-related protein-like [Vitis vinifera]
TRINITY_DN9480_c0_g1_i2.p1	ammonium transporter 3 member 1-like [Malus domestica]	TRINITY_DN24698_c0_g1_i1.p1	#N/A	MD15G1139800	4.624	5.59884e-66	5.79	2.1846e-104	ammonium transporter 3 member 1-like [Pyrus x bretschneideri, Prunus mume, Malus domestica, Fragaria vesca subsp. vesca];hypothetical protein PRUPE_ppa004749mg [Prunus persica];ammonium transporter, putative [Ricinus communis]
TRINITY_DN55746_c0_g1_i1.p1	protein DETOXIFICATION 14-like [Malus domestica]	TRINITY_DN20258_c1_g1_i5.p1	protein DETOXIFICATION 14-like [Malus domestica]	MD13G1032100	5.613	3.5379e-14	5.753	9.22249e-15	MATE efflux family protein 9-like [Pyrus x bretschneideri, Prunus mume, Malus domestica];MATE efflux family protein 9-like isoform 2 [Fragaria vesca subsp. vesca];hypothetical protein PRUPE_ppa005754mg [Prunus persica]
TRINITY_DN46935_c0_g1_i1.p1	hypothetical protein C1H46_033365 [Malus baccata]	TRINITY_DN44833_c0_g1_i1.p1	hypothetical protein C1H46_033365 [Malus baccata]	MD15G1274200	5.583	2.07005e-06	6.472	3.81855e-08	B3 domain-containing transcription factor VRN1-like [Pyrus x bretschneideri];B3 domain-containing protein At4g01580-like isoform X2 [Pyrus x bretschneideri];B3 domain-containing transcription factor VRN1-like isoform X1 [Pyrus x bretschneideri]
TRINITY_DN3101_c2_g1_i3.p1	hypothetical protein C1H46_011379 [Malus baccata]	TRINITY_DN21832_c0_g1_i16.p1	hypothetical protein C1H46_011379 [Malus baccata]	MD17G1029100	5.252	4.3292e-290	5.6	0	uncharacterized protein LOC103422959 [Malus domestica];uncharacterized protein LOC103404290 isoform X2 [Malus domestica];uncharacterized protein LOC103404290 isoform X1 [Malus domestica]
TRINITY_DN74250_c0_g1_i1.p1	hypothetical protein C1H46_007572 [Malus baccata]	TRINITY_DN68571_c0_g1_i1.p1	hypothetical protein C1H46_007572 [Malus baccata]	MD10G1074400	5.393	3.02808e-06	6.226	7.07401e-08	protein RADIALIS-like 3 [Pyrus x bretschneideri, Prunus mume];protein RADIALIS-like 6-like [Fragaria vesca subsp. vesca];hypothetical protein PRUPE_ppa015823mg, partial [Prunus persica]
TRINITY_DN11086_c0_g1_i1.p1	PREDICTED: patatin-like protein 2 isoform X1 [Pyrus x bretschneideri]	TRINITY_DN31783_c1_g1_i2.p1	PREDICTED: patatin-like protein 2 isoform X1 [Pyrus x bretschneideri]	MD15G1085800	5.334	2.53679e-227	5.574	2.05635e-248	patatin-like protein 2 isoform X1 [Malus domestica];patatin-like protein 2 [Pyrus x bretschneideri];patatin-like protein 2 isoform X2 [Malus domestica]
TRINITY_DN34415_c0_g1_i1.p1	hypothetical protein C1H46_001561 [Malus baccata]	TRINITY_DN32608_c0_g1_i3.p1	hypothetical protein C1H46_001561 [Malus baccata]	MD14G1152300	5.207	2.9705e-23	3.68	1.15281e-11	omega-hydroxypalmitate O-feruloyl transferase-like [Pyrus x bretschneideri, Malus domestica];omega-hydroxypalmitate O-feruloyl transferase [Prunus mume];hypothetical protein PRUPE_ppa006018mg [Prunus persica]
TRINITY_DN9785_c0_g1_i4.p1	hypothetical protein DVH24_017184 [Malus domestica]	TRINITY_DN8625_c0_g1_i10.p1	hypothetical protein DVH24_017184 [Malus domestica]	MD10G1297900	5.467	4.37868e-34	5.278	1.33385e-31	dof zinc finger protein DOF1.4-like [Pyrus x bretschneideri, Prunus mume, Malus domestica];hypothetical protein PRUPE_ppa020903mg [Prunus persica];hypothetical protein PHAVU_002G226100g [Phaseolus vulgaris]
TRINITY_DN47956_c0_g1_i1.p1	hypothetical protein C1H46_023784 [Malus baccata]	TRINITY_DN41099_c0_g1_i1.p1	hypothetical protein C1H46_023784 [Malus baccata]	MD14G1226900	5.122	1.04458e-06	4.665	1.00785e-05	protein CUP-SHAPED COTYLEDON 1-like [Malus domestica];protein CUP-SHAPED COTYLEDON 1 [Pyrus x bretschneideri, Malus domestica];NAC domain-containing protein 77-like [Pyrus x bretschneideri]
TRINITY_DN56_c0_g1_i4.p1	hypothetical protein C1H46_018336 [Malus baccata]	TRINITY_DN274_c0_g1_i3.p1	cytochrome P450 98A2 [Prunus avium]	MD08G1242900	5.198	0	5.205	0	cytochrome P450 98A2-like [Pyrus x bretschneideri, Malus domestica];hypothetical protein PRUPE_ppa004404mg [Prunus persica];cytochrome P450 98A2 [Prunus mume]
TRINITY_DN37111_c0_g1_i1.p1	hypothetical protein C1H46_037518 [Malus baccata]	TRINITY_DN43015_c0_g1_i1.p1	hypothetical protein C1H46_037518 [Malus baccata]	MD00G1162200	5.005	1.26766e-08	3.937	9.7903e-06	B3 domain-containing protein REM8-like [Malus domestica];B3 domain-containing protein REM9-like [Pyrus x bretschneideri, Malus domestica];B3 domain-containing protein At5g18090-like [Malus domestica]
TRINITY_DN1580_c0_g1_i1.p1	beta-glucosidase 12-like [Malus domestica]	TRINITY_DN1624_c0_g1_i1.p1	beta-glucosidase 12-like [Malus domestica]	MD03G1098600	5.501	0	5.014	1.92153e-281	beta-glucosidase 12-like [Malus domestica];beta-glucosidase 12-like precursor [Malus domestica];beta-glucosidase 13-like [Pyrus x bretschneideri]
TRINITY_DN4644_c0_g1_i2.p1	hypothetical protein DVH24_022683 [Malus domestica]	TRINITY_DN5146_c0_g1_i2.p1	hypothetical protein DVH24_022683 [Malus domestica]	MD10G1126100	5.126	2.75688e-54	4.953	2.33175e-50	uncharacterized protein LOC103444988 [Malus domestica];hypothetical protein PRUPE_ppa026862mg [Prunus persica];hypothetical protein PRUPE_ppa014925mg [Prunus persica]
TRINITY_DN66130_c0_g1_i1.p1	hypothetical protein C1H46_037933 [Malus baccata]	TRINITY_DN5808_c0_g1_i1.p1	hypothetical protein C1H46_037933 [Malus baccata]	MD16G1025800	5.121	2.18781e-276	4.925	3.41026e-254	MLP-like protein 328 [Pyrus x bretschneideri, Malus domestica];hypothetical protein PRUPE_ppa012886mg [Prunus persica];hypothetical protein PRUPE_ppa012890mg [Prunus persica]
TRINITY_DN31475_c0_g1_i2.p1	hypothetical protein DVH24_042484 [Malus domestica]<>hypothetical protein DVH24_023294 [Malus domestica]	TRINITY_DN27277_c0_g1_i1.p1	hypothetical protein DVH24_042484 [Malus domestica]<>hypothetical protein DVH24_023294 [Malus domestica]	MD01G1124700	4.816	0.000102331	4.502	0.000284106	NEDD8-conjugating enzyme Ubc12-like [Pyrus x bretschneideri, Malus domestica];hypothetical protein PRUPE_ppa016880mg [Prunus persica];NEDD8-conjugating enzyme Ubc12 [Nicotiana sylvestris]
TRINITY_DN3331_c2_g1_i1.p1	probable glutathione S-transferase [Malus domestica]<>hypothetical protein C1H46_041566 [Malus baccata]	TRINITY_DN637_c0_g1_i20.p1	hypothetical protein C1H46_043602 [Malus baccata]	MD10G1196900	3.539	6.1944e-57	4.918	5.14837e-112	probable glutathione S-transferase [Pyrus x bretschneideri, Malus domestica];hypothetical protein PRUPE_ppa011202mg [Prunus persica];probable glutathione S-transferase-like [Fragaria vesca subsp. vesca]
TRINITY_DN12332_c0_g2_i6.p1	hypothetical protein DVH24_018387 [Malus domestica]	TRINITY_DN8837_c1_g1_i8.p1	hypothetical protein DVH24_018387 [Malus domestica]	MD02G1116900	6.631	4.06728e-31	4.915	3.85417e-17	ankyrin repeat-containing protein At5g02620-like [Pyrus x bretschneideri, Malus domestica];espin-like [Malus domestica];ankyrin repeat-containing protein At3g12360-like [Malus domestica]
TRINITY_DN5432_c0_g1_i1.p1	LOW QUALITY PROTEIN: probable beta-D-xylosidase 7 [Malus domestica]	TRINITY_DN3558_c0_g1_i1.p1	LOW QUALITY PROTEIN: probable beta-D-xylosidase 7 [Malus domestica]	MD15G1365200	5.39	0	4.914	0	probable beta-D-xylosidase 7 [Pyrus x bretschneideri, Prunus mume, Malus domestica];hypothetical protein PRUPE_ppa001675mg [Prunus persica];probable beta-D-xylosidase 7-like [Fragaria vesca subsp. vesca]
TRINITY_DN18240_c0_g1_i1.p1	hypothetical protein C1H46_043075 [Malus baccata]	TRINITY_DN19114_c0_g1_i1.p1	hypothetical protein C1H46_043075 [Malus baccata]	MD01G1104300	4.729	1.14044e-16	4.787	6.04108e-17	uncharacterized protein LOC103432746 [Malus domestica];uncharacterized protein LOC103958458 [Pyrus x bretschneideri];uncharacterized protein LOC103406850 [Malus domestica]
TRINITY_DN10677_c0_g1_i1.p1	hypothetical protein DVH24_002756 [Malus domestica]	TRINITY_DN13404_c0_g1_i1.p1	hypothetical protein DVH24_002756 [Malus domestica]	MD03G1273700	3.091	1.94991e-36	4.837	6.93927e-90	salicylic acid-binding protein 2-like [Pyrus x bretschneideri, Malus domestica];salicylic acid-binding protein 2-like isoform X1 [Pyrus x bretschneideri];methylesterase 1-like [Fragaria vesca subsp. vesca]
TRINITY_DN2905_c0_g2_i1.p1	hypothetical protein DVH24_010525 [Malus domestica]	TRINITY_DN3148_c0_g3_i1.p1	hypothetical protein DVH24_010525 [Malus domestica]	MD05G1189900	3.553	4.00365e-39	4.801	9.16011e-73	cytochrome P450 82G1-like [Pyrus x bretschneideri, Malus domestica];cytochrome P450 82G1-like isoform X4 [Pyrus x bretschneideri];cytochrome P450 82G1-like isoform X3 [Pyrus x bretschneideri]
TRINITY_DN27705_c0_g1_i1.p1	PREDICTED: glucan endo-1,3-beta-glucosidase, basic isoform-like [Pyrus x bretschneideri]	TRINITY_DN52817_c0_g1_i1.p1	PREDICTED: glucan endo-1,3-beta-glucosidase, basic isoform-like [Pyrus x bretschneideri]	MD12G1083900	1.437	8.06284e-05	4.703	4.30394e-39	glucan endo-1,3-beta-glucosidase, basic isoform-like [Pyrus x bretschneideri, Prunus mume, Malus domestica];glucan endo-1,3-beta-glucosidase, basic isoform-like, partial [Prunus mume];hypothetical protein PRUPE_ppa008126mg [Prunus persica]
TRINITY_DN3359_c0_g1_i2.p1	probable aminotransferase TAT2 [Malus domestica]	TRINITY_DN19596_c0_g1_i4.p1	probable aminotransferase TAT2 [Malus domestica]	MD03G1234800	4.232	0	4.623	0	probable aminotransferase TAT2 [Pyrus x bretschneideri, Malus domestica];probable aminotransferase TAT2 isoform X1 [Prunus mume];hypothetical protein PRUPE_ppa006368mg [Prunus persica]
TRINITY_DN16233_c0_g1_i15.p1	GDSL esterase/lipase At3g26430-like isoform X1 [Malus domestica]<>GDSL esterase/lipase At3g26430-like isoform X1 [Malus domestica]<>GDSL esterase/lipase At3g26430-like isoform X1 [Malus domestica]	TRINITY_DN6063_c0_g1_i9.p1	GDSL esterase/lipase At3g26430-like isoform X2 [Malus domestica]<>GDSL esterase/lipase At3g26430-like isoform X2 [Malus domestica]<>hypothetical protein DVH24_003666 [Malus domestica]	MD16G1100200	2.867	2.00651e-15	4.362	1.47508e-35	GDSL esterase/lipase At3g26430-like [Prunus mume, Malus domestica];alpha-L-fucosidase 3-like [Pyrus x bretschneideri];hypothetical protein PRUPE_ppa026400mg, partial [Prunus persica]
TRINITY_DN25940_c0_g1_i1.p1	triacylglycerol lipase 2-like [Malus domestica]	TRINITY_DN23840_c0_g1_i1.p1	triacylglycerol lipase 2-like [Malus domestica]	MD09G1115900	2.771	9.14879e-08	4.351	1.5422e-17	triacylglycerol lipase 2-like [Pyrus x bretschneideri, Prunus mume, Malus domestica];hypothetical protein PRUPE_ppa022265mg [Prunus persica];hypothetical protein PRUPE_ppa027105mg [Prunus persica]
TRINITY_DN10890_c0_g1_i3.p1	protein trichome birefringence-like 16 isoform X1 [Malus domestica]<>protein trichome birefringence-like 16 isoform X1 [Malus domestica]<>protein trichome birefringence-like 16 isoform X1 [Malus domestica]<>protein trichome birefringence-like 16 isoform X1 [Malus domestica]	TRINITY_DN12836_c0_g1_i3.p1	protein trichome birefringence-like 16 isoform X1 [Malus domestica]<>protein trichome birefringence-like 16 isoform X1 [Malus domestica]<>protein trichome birefringence-like 16 isoform X1 [Malus domestica]<>protein trichome birefringence-like 16 isoform X1 [Malus domestica]	MD15G1219700	4.266	0.000261581	3.69	0.00115198	protein trichome birefringence-like 16 [Pyrus x bretschneideri];protein trichome birefringence-like 16 isoform X1 [Malus domestica];protein trichome birefringence-like 16 isoform X2 [Malus domestica]
TRINITY_DN20987_c0_g1_i1.p1	PREDICTED: anthocyanidin 3-O-glucosyltransferase 2-like [Pyrus x bretschneideri]	TRINITY_DN26386_c0_g1_i1.p1	PREDICTED: anthocyanidin 3-O-glucosyltransferase 2-like [Pyrus x bretschneideri]	MD05G1246700	3.118	2.17845e-15	4.32	2.17239e-29	anthocyanidin 3-O-glucosyltransferase 2-like [Pyrus x bretschneideri, Prunus mume];hypothetical protein PRUPE_ppa004725mg [Prunus persica];UDP-glucose flavonoid 3-O-glucosyltransferase 6-like [Fragaria vesca subsp. vesca]
TRINITY_DN34854_c0_g1_i1.p2	hypothetical protein C1H46_004037 [Malus baccata]	TRINITY_DN39047_c0_g1_i1.p2	hypothetical protein C1H46_004037 [Malus baccata]	MD03G1241700	4.211	5.74962e-05	4.669	1.15588e-05	olee1-like protein [Pyrus x bretschneideri, Prunus mume, Malus domestica];hypothetical protein PRUPE_ppa019680mg [Prunus persica];Anther-specific protein LAT52 precursor, putative [Ricinus communis]
TRINITY_DN3139_c0_g1_i1.p1	hypothetical protein C1H46_037736 [Malus baccata]	TRINITY_DN15933_c1_g1_i1.p1	hypothetical protein C1H46_037736 [Malus baccata]	MD03G1059700	4.102	4.04433e-159	4.29	4.02947e-174	UDP-glycosyltransferase 87A1-like [Pyrus x bretschneideri, Malus domestica];UDP-glycosyltransferase 87A1-like isoform X1 [Malus domestica];UDP-glycosyltransferase 87A1-like isoform X2 [Malus domestica]
TRINITY_DN16603_c0_g1_i1.p1	acetylserotonin O-methyltransferase-like [Malus domestica]	TRINITY_DN20325_c0_g1_i1.p1	acetylserotonin O-methyltransferase-like [Malus domestica]	MD05G1127900	2.862	1.53888e-26	4.193	1.01327e-58	(RS)-norcoclaurine 6-O-methyltransferase-like [Malus domestica];3'-hydroxy-N-methyl-(S)-coclaurine 4'-O-methyltransferase-like [Malus domestica];3'-hydroxy-N-methyl-(S)-coclaurine 4'-O-methyltransferase-like isoform X1 [Malus domestica]
TRINITY_DN23719_c0_g2_i1.p1	F-box protein CPR1-like [Malus domestica]	TRINITY_DN44542_c0_g1_i1.p1	F-box protein CPR1-like [Malus domestica]	MD09G1191300	4.007	1.89972e-08	4.711	3.35329e-11	F-box protein CPR30-like [Pyrus x bretschneideri, Prunus mume, Malus domestica];hypothetical protein PRUPE_ppa017043mg [Prunus persica];hypothetical protein PRUPE_ppa021853mg [Prunus persica]
TRINITY_DN68648_c0_g1_i1.p1	hypothetical protein C1H46_009039 [Malus baccata]	TRINITY_DN72192_c0_g1_i1.p1	hypothetical protein C1H46_009039 [Malus baccata]	MD10G1104900	3.922	1.77094e-07	2.677	0.000256096	transcription factor bHLH139-like [Pyrus x bretschneideri];transcription factor bHLH85-like [Malus domestica];transcription factor bHLH84 [Prunus mume]
TRINITY_DN77707_c0_g1_i1.p1	hypothetical protein C1H46_005594 [Malus baccata]	TRINITY_DN36861_c0_g1_i1.p1	hypothetical protein C1H46_005594 [Malus baccata]	MD05G1221300	3.919	2.39552e-10	4.272	5.29642e-12	feruloyl CoA ortho-hydroxylase 1 [Prunus mume, Malus domestica];feruloyl CoA ortho-hydroxylase 1-like [Pyrus x bretschneideri];hypothetical protein PRUPE_ppa007382mg [Prunus persica]
TRINITY_DN34481_c0_g1_i2.p1	hypothetical protein DVH24_035983 [Malus domestica]	TRINITY_DN31545_c0_g2_i1.p1	hypothetical protein DVH24_035983 [Malus domestica]	MD06G1063000	3.896	3.93932e-11	4.026	1.09045e-11	LOW QUALITY PROTEIN: flavin-containing monooxygenase FMO GS-OX-like 5 [Malus domestica];flavin-containing monooxygenase FMO GS-OX-like 5 [Prunus mume];flavin-containing monooxygenase FMO GS-OX-like 4 [Prunus mume]
TRINITY_DN44234_c0_g1_i1.p1	protein DETOXIFICATION 51-like [Malus domestica]	TRINITY_DN42048_c0_g1_i1.p1	PREDICTED: protein DETOXIFICATION 51 isoform X1 [Pyrus x bretschneideri]<>multidrug and toxin extrusion protein 1 [Pyrus ussuriensis x Pyrus communis]	MD15G1197200	3.883	1.37457e-11	2.679	3.95725e-06	MATE efflux family protein 6-like [Malus domestica];multidrug and toxin extrusion protein 1 isoform X1 [Pyrus x bretschneideri];multidrug and toxin extrusion protein 2 isoform X2 [Pyrus x bretschneideri]
TRINITY_DN31356_c0_g2_i2.p1	hypothetical protein DVH24_025770 [Malus domestica]	TRINITY_DN27898_c0_g1_i1.p1	hypothetical protein DVH24_025770 [Malus domestica]	MD02G1232400	2.408	6.82269e-10	4.121	1.99124e-27	keratin-associated protein 19-2-like [Pyrus x bretschneideri];prisilkin-39-like [Malus domestica];glycine-rich protein A3-like [Pyrus x bretschneideri]
TRINITY_DN37119_c0_g1_i1.p1	lachrymatory-factor synthase [Malus domestica]	TRINITY_DN61286_c0_g1_i1.p1	lachrymatory-factor synthase [Malus domestica]	MD08G1112100	3.844	0.000635293	4.759	6.20959e-05	lachrymatory-factor synthase [Malus domestica];LOW QUALITY PROTEIN: uncharacterized protein LOC103957125 [Pyrus x bretschneideri];hypothetical protein L484_010729 [Morus notabilis]
TRINITY_DN11896_c0_g1_i1.p1	peroxidase 64 [Malus domestica]	TRINITY_DN15358_c0_g1_i1.p1	peroxidase 64 [Malus domestica]	MD02G1124700	2.478	1.53255e-24	4.106	5.6882e-70	peroxidase 64 [Prunus mume, Malus domestica];hypothetical protein PRUPE_ppa008831mg [Prunus persica];peroxidase 64-like [Fragaria vesca subsp. vesca]
TRINITY_DN27232_c0_g1_i1.p1	rust resistance kinase Lr10-like [Malus domestica]	TRINITY_DN39788_c0_g1_i1.p1	hypothetical protein C1H46_024636 [Malus baccata]	MD02G1273700	2.01	4.94567e-08	4.04	2.77203e-30	probable receptor-like protein kinase At1g67000 [Prunus mume, Malus domestica];probable receptor-like protein kinase At5g39020 [Malus domestica];hypothetical protein PRUPE_ppa003241mg [Prunus persica]
TRINITY_DN39661_c0_g1_i2.p1	uncharacterized protein LOC103426743 [Malus domestica]<>hypothetical protein DVH24_018871 [Malus domestica]	TRINITY_DN17058_c0_g1_i4.p1	uncharacterized protein LOC103426743 [Malus domestica]<>hypothetical protein DVH24_018871 [Malus domestica]	MD16G1250000	3.744	1.30956e-20	3.914	2.59229e-22	uncharacterized protein LOC103426743 [Malus domestica];uncharacterized protein LOC103424199 [Malus domestica];uncharacterized protein LOC103414818 [Malus domestica]
TRINITY_DN5721_c0_g1_i3.p1	hypothetical protein C1H46_041470 [Malus baccata]	TRINITY_DN7595_c0_g1_i1.p1	hypothetical protein C1H46_041470 [Malus baccata]	MD00G1070100	3.464	9.03345e-145	4.012	3.08375e-196	F-box protein CPR30-like [Malus domestica];F-box/kelch-repeat protein At3g23880-like [Pyrus x bretschneideri];F-box/kelch-repeat protein At3g06240-like [Pyrus x bretschneideri]
TRINITY_DN46105_c0_g1_i2.p1	MLP-like protein 28 [Malus domestica]	TRINITY_DN20583_c0_g1_i1.p1	MLP-like protein 28 [Malus domestica]	MD16G1024000	5.142	1.39804e-14	3.932	9.90125e-09	MLP-like protein 28 [Pyrus x bretschneideri, Malus domestica];hypothetical protein PRUPE_ppa021708m1g, partial [Prunus persica];kirola-like [Fragaria vesca subsp. vesca]
TRINITY_DN29156_c0_g1_i1.p1	la-related protein 6C-like [Malus domestica]	TRINITY_DN27391_c0_g1_i1.p1	la-related protein 6C-like [Malus domestica]	MD05G1074900	3.679	4.60075e-06	4.777	3.02035e-09	la-related protein 6C [Malus domestica];hypothetical protein PRUPE_ppa024894mg [Prunus persica];la-related protein 6C isoform X1 [Prunus mume]
TRINITY_DN33718_c0_g1_i6.p1	PREDICTED: ribosomal RNA small subunit methyltransferase NEP1-like [Pyrus x bretschneideri]	TRINITY_DN10298_c0_g1_i1.p1	PREDICTED: ribosomal RNA small subunit methyltransferase NEP1-like [Pyrus x bretschneideri]	MD02G1295100	3.589	2.21979e-58	3.871	6.78166e-68	ribosomal RNA small subunit methyltransferase NEP1-like [Citrus sinensis, Pyrus x bretschneideri, Cucumis melo, Prunus mume];ribosomal RNA small subunit methyltransferase nep-1-like [Beta vulgaris subsp. vulgaris];hypothetical protein CICLE_v10005540mg [Citrus clementina]
TRINITY_DN10730_c0_g1_i1.p1	metal tolerance protein 10-like [Malus domestica]	TRINITY_DN15397_c0_g1_i2.p1	metal tolerance protein 10-like [Malus domestica]	MD10G1211700	0.823	0.00106205	3.867	1.93897e-57	metal tolerance protein 10-like [Pyrus x bretschneideri, Malus domestica];metal tolerance protein 9-like [Pyrus x bretschneideri, Malus domestica];hypothetical protein PRUPE_ppa006520mg [Prunus persica]
TRINITY_DN66095_c0_g1_i1.p1	hypothetical protein DVH24_029568 [Malus domestica]	TRINITY_DN38658_c0_g1_i1.p1	hypothetical protein DVH24_029568 [Malus domestica]	MD15G1223100	3.619	7.04862e-10	3.16	1.12295e-07	uncharacterized protein LOC103415886 [Malus domestica];uncharacterized protein LOC103950232 [Pyrus x bretschneideri];uncharacterized protein LOC103940508 [Pyrus x bretschneideri]
TRINITY_DN12693_c0_g1_i3.p1	protein TERMINAL FLOWER 1-like [Malus domestica]<>protein TERMINAL FLOWER 1-like isoform X1 [Malus domestica]<>terminal flower 1 [Malus domestica]<>hypothetical protein DVH24_034950 [Malus domestica]<>TFL1-like protein [Malus domestica]<>TFL1-like protein [Malus domestica]<>TFL1 like protein [Malus domestica]	TRINITY_DN18806_c0_g1_i1.p1	protein TERMINAL FLOWER 1-like [Malus domestica]<>protein TERMINAL FLOWER 1-like isoform X1 [Malus domestica]<>terminal flower 1 [Malus domestica]<>hypothetical protein DVH24_034950 [Malus domestica]<>TFL1-like protein [Malus domestica]<>TFL1-like protein [Malus domestica]<>TFL1 like protein [Malus domestica]	MD12G1023900	3.996	1.89643e-22	3.848	1.17668e-20	protein TERMINAL FLOWER 1-like [Pyrus x bretschneideri, Malus domestica];CEN-like protein 2 [Prunus mume];hypothetical protein PRUPE_ppa012369mg [Prunus persica]
TRINITY_DN14379_c0_g1_i3.p1	dehydrodolichyl diphosphate synthase 6-like [Malus domestica]<>dehydrodolichyl diphosphate synthase 6-like [Malus domestica]	TRINITY_DN42419_c0_g1_i1.p1	dehydrodolichyl diphosphate synthase 6-like [Malus domestica]<>dehydrodolichyl diphosphate synthase 6-like [Malus domestica]	MD02G1118000	1.499	6.09313e-17	3.835	4.95033e-121	dehydrodolichyl diphosphate synthase 6-like [Pyrus x bretschneideri, Malus domestica];rubber cis-polyprenyltransferase HRT2 [Prunus mume];hypothetical protein PRUPE_ppa007586mg [Prunus persica]
TRINITY_DN21250_c1_g1_i15.p1	hypothetical protein DVH24_010540 [Malus domestica]	TRINITY_DN15423_c0_g1_i4.p1	hypothetical protein DVH24_010492 [Malus domestica]	MD05G1190800	3.587	3.35544e-07	4.835	4.12622e-12	probable LRR receptor-like serine/threonine-protein kinase At4g08850 [Malus domestica];probable leucine-rich repeat receptor-like protein kinase At1g35710 [Pyrus x bretschneideri, Malus domestica];probable LRR receptor-like serine/threonine-protein kinase At4g08850 isoform X2 [Pyrus x bretschneideri]
TRINITY_DN47334_c0_g1_i1.p1	PREDICTED: putative lipid-transfer protein DIR1 [Pyrus x bretschneideri]<>lipid-transfer protein DIR1 [Pyrus ussuriensis x Pyrus communis]<>hypothetical protein DVH24_042291 [Malus domestica]<>hypothetical protein C1H46_005567 [Malus baccata]	TRINITY_DN53087_c0_g1_i1.p1	PREDICTED: putative lipid-transfer protein DIR1 [Pyrus x bretschneideri]<>lipid-transfer protein DIR1 [Pyrus ussuriensis x Pyrus communis]<>hypothetical protein DVH24_042291 [Malus domestica]<>hypothetical protein C1H46_005567 [Malus baccata]	MD10G1081500	3.438	0.00109642	3.105	0.00247088	putative lipid-transfer protein DIR1 [Pyrus x bretschneideri, Prunus mume, Malus domestica];hypothetical protein PRUPE_ppa021237mg [Prunus persica];hypothetical protein PRUPE_ppa026221mg [Prunus persica]
TRINITY_DN45660_c0_g1_i1.p1	hypothetical protein DVH24_009075 [Malus domestica]	TRINITY_DN19820_c0_g1_i1.p1	hypothetical protein DVH24_009075 [Malus domestica]	MD06G1218400	3.394	3.39114e-23	2.364	2.10847e-11	uncharacterized protein LOC103438018 [Malus domestica];uncharacterized protein LOC103939050 [Pyrus x bretschneideri];uncharacterized protein LOC103939840 [Pyrus x bretschneideri]
TRINITY_DN19552_c0_g1_i2.p1	hypothetical protein C1H46_008799 [Malus baccata]	TRINITY_DN18661_c0_g1_i2.p1	hypothetical protein C1H46_008799 [Malus baccata]	MD04G1139500	3.926	1.99459e-18	3.736	1.70601e-16	glutathione S-transferase U8-like [Prunus mume, Malus domestica];probable glutathione S-transferase [Pyrus x bretschneideri, Malus domestica];hypothetical protein PRUPE_ppa018112mg, partial [Prunus persica]
TRINITY_DN6709_c0_g1_i3.p1	pectinesterase [Malus domestica]	TRINITY_DN6777_c0_g1_i4.p1	pectinesterase [Malus domestica]	MD16G1022200	1.756	3.86116e-28	3.715	1.2886e-130	pectinesterase-like [Pyrus x bretschneideri, Malus domestica];pectinesterase [Malus domestica];probable pectinesterase/pectinesterase inhibitor 6-like [Fragaria vesca subsp. vesca]
TRINITY_DN74654_c0_g1_i1.p1	hypothetical protein C1H46_018188 [Malus baccata]	TRINITY_DN34066_c0_g1_i1.p1	hypothetical protein C1H46_018188 [Malus baccata]	MD09G1183700	3.351	5.08861e-21	2.528	5.12342e-12	AP2-like ethylene-responsive transcription factor AIL1 [Pyrus x bretschneideri];AP2-like ethylene-responsive transcription factor BBM [Malus domestica];hypothetical protein PRUPE_ppa015833mg [Prunus persica]
TRINITY_DN7616_c0_g1_i1.p1	PREDICTED: ribosomal RNA small subunit methyltransferase NEP1-like [Pyrus x bretschneideri]	TRINITY_DN7465_c0_g1_i1.p1	PREDICTED: ribosomal RNA small subunit methyltransferase NEP1-like [Pyrus x bretschneideri]	MD02G1295000	3.35	3.19986e-73	3.678	2.26409e-88	ribosomal RNA small subunit methyltransferase NEP1-like [Pyrus x bretschneideri, Malus domestica];ribosomal RNA small subunit methyltransferase nep-1-like [Prunus mume];hypothetical protein PRUPE_ppa019713mg, partial [Prunus persica]
TRINITY_DN11126_c0_g1_i1.p1	hypothetical protein C1H46_035257 [Malus baccata]	TRINITY_DN74466_c0_g1_i1.p1	uncharacterized protein At5g01610-like [Malus domestica]<>hypothetical protein DVH24_008908 [Malus domestica]	MD06G1198400	0.883	0.0040565	3.669	6.43521e-28	uncharacterized protein At5g01610-like [Prunus mume, Malus domestica];LOW QUALITY PROTEIN: uncharacterized protein At5g01610 [Pyrus x bretschneideri];hypothetical protein PRUPE_ppa012348mg [Prunus persica]
TRINITY_DN24552_c1_g1_i2.p1	uncharacterized protein LOC110748596 [Prunus avium]	TRINITY_DN32984_c0_g1_i1.p1	hypothetical protein C1H46_045591 [Malus baccata]	MD08G1077900	3.293	3.47404e-06	3.702	2.66586e-07	hypothetical protein PRUPE_ppa026387mg [Prunus persica];helicase SEN1-like [Prunus mume];uncharacterized protein LOC103322333 [Prunus mume]
TRINITY_DN11599_c0_g1_i11.p1	hypothetical protein C1H46_021858 [Malus baccata]	TRINITY_DN14231_c0_g1_i7.p1	hypothetical protein C1H46_021858 [Malus baccata]	MD08G1021900	2.861	6.94801e-48	3.577	1.22463e-75	TMV resistance protein N-like [Pyrus x bretschneideri, Malus domestica];TMV resistance protein N-like isoform X2 [Pyrus x bretschneideri];TMV resistance protein N-like isoform X1 [Pyrus x bretschneideri]
TRINITY_DN30433_c0_g1_i1.p1	shikimate O-hydroxycinnamoyltransferase-like [Malus domestica]	TRINITY_DN19825_c0_g1_i1.p1	shikimate O-hydroxycinnamoyltransferase-like [Malus domestica]	MD17G1157600	5.187	2.67984e-54	3.555	1.41908e-24	shikimate O-hydroxycinnamoyltransferase-like [Pyrus x bretschneideri, Malus domestica];shikimate O-hydroxycinnamoyltransferase [Pyrus x bretschneideri, Malus domestica];anthranilate N-benzoyltransferase protein 1-like [Prunus mume]
TRINITY_DN7238_c0_g1_i1.p1	hypothetical protein C1H46_014954 [Malus baccata]	TRINITY_DN12808_c0_g1_i2.p1	probable polygalacturonase [Malus domestica]<>hypothetical protein DVH24_024809 [Malus domestica]	MD07G1279000	1.281	4.64425e-11	3.555	5.17346e-76	probable polygalacturonase [Pyrus x bretschneideri, Prunus mume, Malus domestica];hypothetical protein PRUPE_ppa005185mg [Prunus persica];probable polygalacturonase-like [Fragaria vesca subsp. vesca]
TRINITY_DN26886_c0_g1_i1.p1	putative receptor protein kinase ZmPK1 [Malus domestica]	TRINITY_DN60469_c0_g1_i1.p1	hypothetical protein C1H46_006221 [Malus baccata]	MD12G1151200	2.327	2.90122e-15	3.537	1.07826e-34	putative receptor protein kinase ZmPK1 [Pyrus x bretschneideri, Malus domestica];hypothetical protein PRUPE_ppa018327mg [Prunus persica];hypothetical protein PRUPE_ppa001791mg [Prunus persica]
TRINITY_DN20812_c0_g1_i3.p1	hypothetical protein C1H46_037105 [Malus baccata]	TRINITY_DN26218_c0_g1_i1.p1	hypothetical protein C1H46_040794 [Malus baccata]	MD06G1004900	3.243	6.11066e-15	3.686	6.09091e-19	protein BEARSKIN1 [Malus domestica];protein CUP-SHAPED COTYLEDON 3-like [Pyrus x bretschneideri];protein CUP-SHAPED COTYLEDON 3 [Prunus mume]
TRINITY_DN18364_c0_g1_i6.p3	#N/A	TRINITY_DN1053_c0_g1_i2.p2	#N/A	MD16G1090800	3.225	8.95829e-08	3.231	1.19046e-07	no annotation
TRINITY_DN32739_c0_g1_i3.p1	hypothetical protein C1H46_012122 [Malus baccata]	TRINITY_DN25710_c0_g1_i2.p1	hypothetical protein C1H46_012122 [Malus baccata]	MD01G1017100	3.71	3.33135e-38	3.472	4.32398e-33	transcription factor MYB90-like isoform X1 [Malus domestica];transcription factor MYB113-like isoform X2 [Malus domestica];transcription factor MYB113-like [Malus domestica]
TRINITY_DN42737_c0_g1_i1.p1	PREDICTED: probable leucine-rich repeat receptor-like protein kinase At5g63930 [Pyrus x bretschneideri]	TRINITY_DN18252_c1_g1_i2.p1	PREDICTED: probable leucine-rich repeat receptor-like protein kinase At5g63930 [Pyrus x bretschneideri]	MD08G1239100	2.667	6.04094e-23	3.403	3.65751e-37	probable leucine-rich repeat receptor-like protein kinase At1g35710 [Pyrus x bretschneideri];probable leucine-rich repeat receptor-like protein kinase At5g63930 [Prunus mume];receptor-like protein 12 [Pyrus x bretschneideri]
TRINITY_DN11080_c0_g1_i4.p1	hypothetical protein C1H46_031539 [Malus baccata]	TRINITY_DN29252_c0_g1_i1.p1	hypothetical protein C1H46_031539 [Malus baccata]	MD15G1156200	-0.842	0.000840975	3.386	1.13003e-65	LOW QUALITY PROTEIN: receptor-like serine/threonine-protein kinase SD1-6, partial [Malus domestica];cysteine-rich receptor-like protein kinase 19 [Pyrus x bretschneideri];cysteine-rich receptor-like protein kinase 19 isoform X2 [Prunus mume]
TRINITY_DN57341_c0_g1_i1.p1	protein ACCELERATED CELL DEATH 6-like [Malus domestica]	TRINITY_DN63465_c0_g1_i1.p1	protein ACCELERATED CELL DEATH 6-like [Malus domestica]	MD12G1218700	3.076	2.35668e-18	2.336	8.92979e-11	serine/threonine-protein phosphatase 6 regulatory ankyrin repeat subunit A-like [Malus domestica];ankyrin repeat-containing protein At5g02620-like [Prunus mume];hypothetical protein PRUPE_ppa020268mg [Prunus persica]
TRINITY_DN3686_c0_g1_i6.p1	peroxisomal 2,4-dienoyl-CoA reductase [Pyrus ussuriensis x Pyrus communis]	TRINITY_DN2956_c0_g1_i1.p1	hypothetical protein C1H46_036731 [Malus baccata]	MD10G1209100	3.117	3.34373e-107	3.347	1.51087e-123	peroxisomal 2,4-dienoyl-CoA reductase-like [Malus domestica];peroxisomal 2,4-dienoyl-CoA reductase [Pyrus x bretschneideri];Short-chain dehydrogenase-reductase B [Theobroma cacao]
TRINITY_DN43079_c0_g1_i2.p1	uncharacterized protein LOC103451284 [Malus domestica]<>hypothetical protein DVH24_036498 [Malus domestica]	TRINITY_DN39138_c0_g1_i2.p1	uncharacterized protein LOC103451284 [Malus domestica]<>hypothetical protein DVH24_036498 [Malus domestica]	MD12G1205000	3.057	1.434e-06	3.442	8.96451e-08	putative high mobility group B protein 11 [Malus domestica];uncharacterized protein LOC103962323 [Pyrus x bretschneideri];high mobility group B protein 15-like [Pyrus x bretschneideri]
TRINITY_DN4494_c0_g1_i1.p1	hypothetical protein DVH24_028076 [Malus domestica]	TRINITY_DN22508_c0_g1_i1.p1	hypothetical protein DVH24_028076 [Malus domestica]	MD17G1110200	1.406	6.88911e-13	3.314	6.31517e-67	major latex allergen Hev b 5-like [Malus domestica];fruit protein pKIWI501 isoform X1 [Pyrus x bretschneideri];fruit protein pKIWI501 isoform X2 [Pyrus x bretschneideri]
TRINITY_DN37680_c0_g1_i1.p1	hypothetical protein C1H46_019332 [Malus baccata]	TRINITY_DN19824_c0_g2_i1.p1	hypothetical protein C1H46_019332 [Malus baccata]	MD10G1138200	3.007	3.05086e-06	2.427	0.000135634	tether containing UBX domain for GLUT4-like [Pyrus x bretschneideri, Prunus mume, Malus domestica];hypothetical protein PRUPE_ppa024637mg [Prunus persica];tether containing UBX domain for GLUT4 isoform X2 [Vitis vinifera]
TRINITY_DN38726_c0_g1_i1.p1	dof zinc finger protein DOF5.3-like [Malus domestica]	TRINITY_DN29594_c0_g1_i1.p1	dof zinc finger protein DOF5.3-like [Malus domestica]	MD10G1292200	2.998	1.23722e-10	2.833	1.94341e-09	dof zinc finger protein DOF5.3-like [Pyrus x bretschneideri, Malus domestica];dof zinc finger protein DOF1.1-like [Pyrus x bretschneideri];dof zinc finger protein DOF2.1-like [Malus domestica]
TRINITY_DN31220_c0_g1_i1.p1	hypothetical protein DVH24_029106 [Malus domestica]	TRINITY_DN26429_c0_g1_i1.p1	hypothetical protein DVH24_029106 [Malus domestica]	MD15G1165800	2.877	6.88661e-10	3.26	3.75771e-12	uncharacterized protein LOC103400073 isoform X1 [Malus domestica];uncharacterized protein LOC103400073 isoform X2 [Malus domestica];F-box/LRR-repeat protein 25-like [Prunus mume]
TRINITY_DN24237_c0_g1_i1.p1	zinc finger protein 7-like [Malus domestica]<>hypothetical protein C1H46_004071 [Malus baccata]	TRINITY_DN21742_c0_g1_i1.p1	zinc finger protein 7-like [Malus domestica]<>hypothetical protein C1H46_004071 [Malus baccata]	MD00G1108900	2.867	1.49412e-06	2.322	8.67706e-05	zinc finger protein 7-like [Pyrus x bretschneideri, Prunus mume, Malus domestica, Fragaria vesca subsp. vesca];hypothetical protein PRUPE_ppa011906mg [Prunus persica];Zinc finger protein 7, putative [Theobroma cacao]
TRINITY_DN9148_c0_g1_i1.p1	hypothetical protein C1H46_027435 [Malus baccata]	TRINITY_DN21340_c0_g1_i1.p1	hypothetical protein C1H46_027435 [Malus baccata]	MD16G1108700	2.541	3.60074e-53	3.251	3.03565e-87	vinorine synthase-like [Pyrus x bretschneideri, Prunus mume, Malus domestica, Fragaria vesca subsp. vesca];HXXXD-type acyl-transferase family protein, putative [Theobroma cacao];vinorine synthase [Vitis vinifera]
TRINITY_DN13778_c0_g1_i2.p1	uncharacterized protein LOC103442127 [Malus domestica]<>uncharacterized protein LOC103442127 [Malus domestica]	TRINITY_DN2695_c1_g1_i1.p1	uncharacterized protein LOC103442127 [Malus domestica]<>uncharacterized protein LOC103442127 [Malus domestica]	MD15G1041200	2.668	7.83205e-16	3.238	8.72759e-23	uncharacterized protein LOC103442127 [Malus domestica];uncharacterized protein LOC103953533 [Pyrus x bretschneideri];uncharacterized protein LOC103953181 [Pyrus x bretschneideri]
TRINITY_DN18293_c0_g1_i2.p1	remorin-like isoform X2 [Malus domestica]	TRINITY_DN62837_c0_g1_i1.p1	remorin-like isoform X2 [Malus domestica]	MD01G1200400	0.915	0.0024954	3.235	2.47784e-24	remorin-like isoform X2 [Malus domestica];remorin-like isoform X1 [Malus domestica];remorin-like [Pyrus x bretschneideri]
TRINITY_DN8107_c0_g1_i1.p1	hypothetical protein C1H46_020176 [Malus baccata]	TRINITY_DN14755_c0_g1_i1.p1	hypothetical protein C1H46_020176 [Malus baccata]	MD06G1238100	0.849	7.89073e-06	3.228	1.947e-64	germin-like protein subfamily 1 member 13 [Pyrus x bretschneideri, Malus domestica];germin-like protein subfamily 1 member 17 [Pyrus x bretschneideri, Malus domestica];germin-like protein subfamily 1 member 20 [Prunus mume]
TRINITY_DN12094_c0_g1_i1.p1	(R)-mandelonitrile lyase 3-like [Malus domestica]<>(R)-mandelonitrile lyase 3-like [Malus domestica]<>hypothetical protein DVH24_002314 [Malus domestica]	TRINITY_DN12637_c0_g1_i1.p1	(R)-mandelonitrile lyase 3-like [Malus domestica]<>(R)-mandelonitrile lyase 3-like [Malus domestica]<>hypothetical protein DVH24_002314 [Malus domestica]	MD13G1264200	3.076	5.52809e-116	3.227	3.03632e-127	(R)-mandelonitrile lyase 3-like [Malus domestica];(R)-mandelonitrile lyase 1-like [Malus domestica];hypothetical protein PRUPE_ppa003595mg [Prunus persica]
TRINITY_DN2911_c1_g1_i1.p1	hypothetical protein D8674_005606 [Pyrus ussuriensis x Pyrus communis]	TRINITY_DN23773_c0_g1_i1.p1	PREDICTED: uncharacterized protein LOC103967247 [Pyrus x bretschneideri]	MD11G1224000	2.81	6.88615e-08	3.809	2.48239e-13	uncharacterized protein LOC103448518 [Malus domestica];uncharacterized protein LOC103967247 [Pyrus x bretschneideri];uncharacterized protein LOC103934562 [Pyrus x bretschneideri]
TRINITY_DN4780_c0_g1_i1.p1	transport and Golgi organization 2 homolog [Malus domestica]	TRINITY_DN23939_c0_g1_i2.p1	transport and Golgi organization 2 homolog [Malus domestica]	MD06G1010300	1.4	5.33735e-24	3.17	2.14706e-127	transport and Golgi organization 2 homolog [Pyrus x bretschneideri, Malus domestica];ser/Thr-rich protein T10 in DGCR region-like [Fragaria vesca subsp. vesca];LOW QUALITY PROTEIN: transport and Golgi organization protein 2 homolog [Malus domestica]
TRINITY_DN27212_c0_g1_i1.p1	hypothetical protein C1H46_030092 [Malus baccata]	TRINITY_DN33769_c0_g1_i1.p1	hypothetical protein C1H46_030092 [Malus baccata]	MD15G1120900	2.801	4.59239e-08	3.361	7.593e-11	U-box domain-containing protein 11-like [Malus domestica];U-box domain-containing protein 14-like [Pyrus x bretschneideri];hypothetical protein PRUPE_ppa009071mg [Prunus persica]
TRINITY_DN2162_c1_g1_i1.p1	hypothetical protein C1H46_007579 [Malus baccata]	TRINITY_DN7590_c0_g2_i1.p1	hypothetical protein C1H46_007579 [Malus baccata]	MD10G1075200	1.333	1.36555e-14	3.169	3.69466e-77	transcription factor RADIALIS-like [Malus domestica];transcription factor RADIALIS isoform X2 [Pyrus x bretschneideri];transcription factor RADIALIS isoform X1 [Pyrus x bretschneideri]
TRINITY_DN13555_c0_g1_i8.p1	PREDICTED: regulatory protein NPR5-like [Pyrus x bretschneideri]<>PREDICTED: regulatory protein NPR5-like [Pyrus x bretschneideri]<>NPR7 [Malus domestica]<>regulatory protein NPR5-like [Pyrus ussuriensis x Pyrus communis]<>hypothetical protein C1H46_008537 [Malus baccata]<>regulatory protein NPR5-like [Pyrus ussuriensis x Pyrus communis]<>hypothetical protein DVH24_019688 [Malus domestica]	TRINITY_DN12970_c0_g1_i1.p1	PREDICTED: regulatory protein NPR5-like [Pyrus x bretschneideri]<>PREDICTED: regulatory protein NPR5-like [Pyrus x bretschneideri]<>NPR7 [Malus domestica]<>regulatory protein NPR5-like [Pyrus ussuriensis x Pyrus communis]<>hypothetical protein C1H46_008537 [Malus baccata]<>regulatory protein NPR5-like [Pyrus ussuriensis x Pyrus communis]<>hypothetical protein DVH24_019688 [Malus domestica]	MD14G1083700	3.284	2.25441e-36	3.127	1.33296e-32	regulatory protein NPR5-like [Pyrus x bretschneideri, Malus domestica];regulatory protein NPR5-like isoform X2 [Malus domestica];regulatory protein NPR5 [Prunus mume]
TRINITY_DN151_c0_g1_i4.p1	phloretin 4'-O-glycosyltransferase [Malus toringoides]	TRINITY_DN1440_c0_g1_i15.p1	phloretin 4'-O-glycosyltransferase [Malus toringoides]	MD07G1280800	3.539	2.46733e-142	3.12	1.32906e-110	UDP-glycosyltransferase 88A1-like [Pyrus x bretschneideri, Malus domestica];LOW QUALITY PROTEIN: UDP-glycosyltransferase 88A1-like [Malus domestica];UDP-glycosyltransferase 88A1 [Prunus mume]
TRINITY_DN35649_c0_g1_i1.p1	PREDICTED: VQ motif-containing protein 17 [Pyrus x bretschneideri]	TRINITY_DN22884_c0_g1_i1.p1	hypothetical protein C1H46_025305 [Malus baccata]	MD12G1057500	2.735	1.84948e-05	2.186	0.000445557	uncharacterized protein LOC103443128 [Malus domestica];uncharacterized protein LOC103959508 [Pyrus x bretschneideri];uncharacterized protein LOC103454259 [Malus domestica]
TRINITY_DN7037_c0_g1_i3.p1	hypothetical protein C1H46_007707 [Malus baccata]	TRINITY_DN8788_c0_g1_i4.p1	hypothetical protein C1H46_007707 [Malus baccata]	MD09G1142500	2.708	8.70116e-06	2.746	9.57907e-06	UDP-glycosyltransferase 85A5-like [Malus domestica];UDP-glycosyltransferase 85A2-like [Malus domestica];7-deoxyloganetin glucosyltransferase-like [Pyrus x bretschneideri]
TRINITY_DN8050_c0_g1_i1.p1	hypothetical protein C1H46_039921 [Malus baccata]	TRINITY_DN1213_c0_g2_i2.p1	hypothetical protein C1H46_039921 [Malus baccata]	MD14G1246000	2.31	2.31027e-127	3.081	1.766e-230	probable metal-nicotianamine transporter YSL7 [Prunus mume, Malus domestica];hypothetical protein PRUPE_ppa001999mg [Prunus persica];hypothetical protein PRUPE_ppa002002mg [Prunus persica]
TRINITY_DN18339_c0_g1_i3.p1	hypothetical protein DVH24_011684 [Malus domestica]	TRINITY_DN13654_c0_g1_i2.p1	hypothetical protein C1H46_022508 [Malus baccata]	MD05G1340700	2.694	6.34e-09	2.466	1.54046e-07	protein YLS9-like [Pyrus x bretschneideri, Malus domestica];hypothetical protein PRUPE_ppa015351mg [Prunus persica];protein YLS9 [Prunus mume]
TRINITY_DN12467_c0_g1_i1.p1	alpha carbonic anhydrase 7-like [Malus domestica]	TRINITY_DN52936_c0_g1_i1.p1	alpha carbonic anhydrase 7-like [Malus domestica]	MD00G1067900	1.092	7.61669e-06	3.076	4.31862e-37	bifunctional monodehydroascorbate reductase and carbonic anhydrase nectarin-3-like [Prunus mume, Malus domestica];bifunctional monodehydroascorbate reductase and carbonic anhydrase nectarin-3-like isoform X1 [Prunus mume];hypothetical protein PRUPE_ppa024299mg [Prunus persica]
TRINITY_DN35465_c0_g1_i1.p1	uncharacterized protein LOC103413235 [Malus domestica]<>hypothetical protein DVH24_006688 [Malus domestica]	TRINITY_DN42637_c0_g1_i1.p1	uncharacterized protein LOC103413235 [Malus domestica]<>hypothetical protein DVH24_006688 [Malus domestica]	MD02G1313500	2.631	4.23316e-05	2.871	1.41577e-05	uncharacterized protein LOC103413235 [Malus domestica];uncharacterized protein LOC103330465 [Prunus mume];hypothetical protein PRUPE_ppa018480mg [Prunus persica]
TRINITY_DN11786_c0_g1_i1.p1	hypothetical protein C1H46_019150 [Malus baccata]	TRINITY_DN19075_c0_g1_i1.p1	hypothetical protein C1H46_019150 [Malus baccata]	MD11G1075700	1.88	2.82389e-23	3.021	1.17643e-60	cytochrome P450 704C1-like [Pyrus x bretschneideri, Prunus mume, Malus domestica];hypothetical protein PRUPE_ppa022359mg [Prunus persica];hypothetical protein PRUPE_ppa016904mg [Prunus persica]
TRINITY_DN16594_c0_g1_i1.p1	hypothetical protein C1H46_011271 [Malus baccata]	TRINITY_DN3009_c0_g1_i1.p1	hypothetical protein C1H46_011271 [Malus baccata]	MD11G1269400	3.71	3.83216e-72	3.014	4.96382e-47	miraculin-like [Malus domestica];alpha-amylase/subtilisin inhibitor-like [Pyrus x bretschneideri];hypothetical protein PRUPE_ppa011448mg [Prunus persica]
TRINITY_DN6331_c0_g1_i1.p1	protein DMR6-LIKE OXYGENASE 2-like [Malus domestica]<>hypothetical protein C1H46_020864 [Malus baccata]	TRINITY_DN3256_c0_g1_i1.p1	protein DMR6-LIKE OXYGENASE 2-like [Malus domestica]<>hypothetical protein C1H46_020864 [Malus baccata]	MD05G1046000	3.049	2.2745e-137	3.011	4.38951e-133	1-aminocyclopropane-1-carboxylate oxidase homolog [Pyrus x bretschneideri, Malus domestica];flavonol synthase/flavanone 3-hydroxylase-like [Pyrus x bretschneideri, Malus domestica];protein SRG1-like [Malus domestica]
TRINITY_DN15112_c0_g1_i5.p1	hypothetical protein DVH24_010098 [Malus domestica]	TRINITY_DN18731_c0_g1_i2.p1	hypothetical protein DVH24_010098 [Malus domestica]	MD05G1133000	2.775	2.37112e-35	2.982	1.78475e-40	probable flavin-containing monooxygenase 1 [Pyrus x bretschneideri, Prunus mume];hypothetical protein PRUPE_ppa004389mg [Prunus persica];hypothetical protein PRUPE_ppa004370mg [Prunus persica]
TRINITY_DN19546_c0_g1_i1.p1	low-temperature-induced 65 kDa protein isoform X1 [Malus domestica]<>hypothetical protein DVH24_024740 [Malus domestica]	TRINITY_DN28574_c0_g1_i3.p1	low-temperature-induced 65 kDa protein isoform X1 [Malus domestica]<>hypothetical protein DVH24_024740 [Malus domestica]	MD07G1268800	3.808	9.96708e-64	2.977	2.5114e-38	low-temperature-induced 65 kDa protein isoform X1 [Malus domestica];low-temperature-induced 65 kDa protein isoform X3 [Malus domestica];low-temperature-induced 65 kDa protein isoform X2 [Malus domestica]
TRINITY_DN834_c0_g1_i10.p1	ABC transporter E family member 2-like isoform X1 [Malus domestica]<>ABC transporter E family member 2-like isoform X1 [Malus domestica]<>ABC transporter E family member 2-like isoform X1 [Malus domestica]	TRINITY_DN1485_c0_g1_i5.p1	ABC transporter E family member 2-like isoform X1 [Malus domestica]<>ABC transporter E family member 2-like isoform X1 [Malus domestica]<>ABC transporter E family member 2-like isoform X1 [Malus domestica]	MD08G1001700	3.11	1.46337e-223	2.966	3.73797e-201	ABC transporter E family member 2 isoform X2 [Malus domestica];ABC transporter E family member 2 [Prunus mume];ABC transporter E family member 2 isoform X1 [Malus domestica]
TRINITY_DN3954_c0_g1_i1.p1	hydroquinone glucosyltransferase-like [Malus domestica]	TRINITY_DN6604_c0_g1_i1.p1	hydroquinone glucosyltransferase-like [Malus domestica]	MD06G1103400	1.608	2.75465e-57	2.958	1.27884e-196	hydroquinone glucosyltransferase-like [Pyrus x bretschneideri, Malus domestica];hydroquinone glucosyltransferase-like isoform X2 [Pyrus x bretschneideri];hydroquinone glucosyltransferase-like isoform X1 [Pyrus x bretschneideri]
TRINITY_DN1422_c0_g1_i2.p1	hypothetical protein DVH24_022611 [Malus domestica]	TRINITY_DN11072_c0_g1_i2.p1	hypothetical protein DVH24_022611 [Malus domestica]	MD01G1194000	1.004	4.31061e-10	2.957	8.74658e-79	peroxidase 66-like [Pyrus x bretschneideri, Malus domestica];LOW QUALITY PROTEIN: peroxidase 66 [Pyrus x bretschneideri];peroxidase 66 [Prunus mume]
TRINITY_DN3210_c0_g1_i3.p1	hypothetical protein C1H46_036358 [Malus baccata]	TRINITY_DN431_c0_g1_i19.p1	hypothetical protein C1H46_036358 [Malus baccata]	MD16G1094400	2.399	6.98462e-215	2.948	0	probable nucleoredoxin 1 [Malus domestica];probable nucleoredoxin 1 isoform X2 [Malus domestica];probable nucleoredoxin 1 isoform X1 [Malus domestica]
TRINITY_DN8787_c0_g1_i1.p1	hypothetical protein C1H46_002858 [Malus baccata]	TRINITY_DN28964_c0_g1_i1.p1	hypothetical protein C1H46_002858 [Malus baccata]	MD09G1285900	0.716	5.22968e-05	2.941	6.42195e-61	probable glycerol-3-phosphate acyltransferase 3 [Pyrus x bretschneideri, Prunus mume, Malus domestica];hypothetical protein PRUPE_ppa017374mg [Prunus persica];probable glycerol-3-phosphate acyltransferase 3-like [Fragaria vesca subsp. vesca]
TRINITY_DN11872_c0_g1_i1.p1	epoxide hydrolase 1 [Malus domestica]<>hypothetical protein DVH24_029860 [Malus domestica]<>hypothetical protein C1H46_039058 [Malus baccata]	TRINITY_DN14132_c0_g1_i1.p1	epoxide hydrolase 1 [Malus domestica]<>hypothetical protein DVH24_029860 [Malus domestica]<>hypothetical protein C1H46_039058 [Malus baccata]	MD15G1260700	2.449	1.45017e-33	2.916	3.05076e-47	monoacylglycerol lipase abhd6-A [Malus domestica];epoxide hydrolase 4-like [Pyrus x bretschneideri];monoacylglycerol lipase ABHD6 [Malus domestica]
TRINITY_DN14318_c0_g1_i3.p1	hypothetical protein DVH24_002079 [Malus domestica]	TRINITY_DN68432_c0_g1_i1.p1	hypothetical protein DVH24_002079 [Malus domestica]	MD15G1433100	2.456	0.000160758	4.179	8.72206e-10	thioredoxin X, chloroplastic-like [Malus domestica];LOW QUALITY PROTEIN: thioredoxin X, chloroplastic [Pyrus x bretschneideri];thioredoxin X, chloroplastic [Prunus mume]
TRINITY_DN3153_c1_g1_i1.p1	hypothetical protein C1H46_003293 [Malus baccata]	TRINITY_DN3294_c0_g2_i1.p1	hypothetical protein C1H46_003293 [Malus baccata]	MD15G1071500	2.45	0.000306448	2.985	3.33814e-05	LOB domain-containing protein 37-like [Pyrus x bretschneideri, Prunus mume, Malus domestica];hypothetical protein PRUPE_ppa014964mg [Prunus persica];LOB domain-containing protein 39-like [Fragaria vesca subsp. vesca]
TRINITY_DN26044_c0_g1_i1.p1	cytochrome P450 78A5 [Malus domestica]	TRINITY_DN16828_c0_g1_i1.p1	cytochrome P450 78A5 [Malus domestica]	MD14G1214200	2.67	6.67884e-35	2.889	1.72533e-40	cytochrome P450 78A5-like [Pyrus x bretschneideri, Malus domestica];cytochrome P450 78A5 [Prunus mume];hypothetical protein PRUPE_ppa004083mg [Prunus persica]
TRINITY_DN45840_c0_g1_i1.p1	UDP-glycosyltransferase 87A1-like [Malus domestica]	TRINITY_DN23979_c0_g1_i2.p1	UDP-glycosyltransferase 87A1-like [Malus domestica]	MD11G1062800	2.119	2.95255e-22	2.889	1.78916e-41	UDP-glycosyltransferase 87A1-like isoform X2 [Pyrus x bretschneideri];UDP-glycosyltransferase 87A1-like [Malus domestica];UDP-glycosyltransferase 87A1-like isoform X1 [Pyrus x bretschneideri]
TRINITY_DN26208_c0_g1_i1.p1	hypothetical protein C1H46_025231 [Malus baccata]	TRINITY_DN8612_c0_g2_i2.p1	hypothetical protein C1H46_025231 [Malus baccata]	MD13G1110500	2.431	7.9747e-10	3.217	3.96593e-16	vinorine synthase-like [Vitis vinifera, Prunus mume, Malus domestica, Eucalyptus grandis];vinorine synthase [Pyrus x bretschneideri];3'-N-debenzoyl-2'-deoxytaxol N-benzoyltransferase, putative [Ricinus communis]
TRINITY_DN25085_c0_g1_i2.p1	uncharacterized protein LOC114822431 isoform X1 [Malus domestica]	TRINITY_DN7795_c0_g1_i11.p1	uncharacterized protein LOC114822431 isoform X1 [Malus domestica]	MD02G1311400	2.427	1.17033e-15	2.021	7.70497e-11	uncharacterized protein LOC103411317 [Malus domestica];uncharacterized protein LOC103954858 isoform X1 [Pyrus x bretschneideri];uncharacterized protein LOC103954858 isoform X2 [Pyrus x bretschneideri]
TRINITY_DN18262_c0_g1_i5.p1	hypothetical protein C1H46_025474 [Malus baccata]	TRINITY_DN2144_c1_g1_i3.p1	hypothetical protein C1H46_025474 [Malus baccata]	MD12G1025600	2.934	1.45656e-71	2.856	4.62662e-67	heat shock cognate 70 kDa protein-like [Malus domestica];heat shock cognate 70 kDa protein-like isoform X2 [Pyrus x bretschneideri];heat shock cognate 70 kDa protein-like isoform X1 [Pyrus x bretschneideri]
TRINITY_DN19638_c0_g1_i1.p1	hypothetical protein C1H46_041626 [Malus baccata]	TRINITY_DN3820_c1_g1_i6.p1	hypothetical protein C1H46_041626 [Malus baccata]	MD17G1059300	2.121	5.86432e-11	2.825	2.28395e-18	uncharacterized protein LOC103950980 [Pyrus x bretschneideri];monoacylglycerol lipase ABHD6-like [Pyrus x bretschneideri];uncharacterized protein LOC103955788 [Pyrus x bretschneideri]
TRINITY_DN15091_c0_g1_i1.p1	hypothetical protein C1H46_019218 [Malus baccata]	TRINITY_DN10011_c0_g1_i2.p1	hypothetical protein C1H46_019218 [Malus baccata]	MD06G1077700	4.303	5.54253e-54	2.818	2.79646e-22	salutaridine reductase-like [Malus domestica];salutaridine reductase-like isoform X2 [Pyrus x bretschneideri];salutaridine reductase-like isoform X1 [Pyrus x bretschneideri]
TRINITY_DN43079_c0_g1_i1.p1	putative high mobility group B protein 11 [Malus domestica]	TRINITY_DN39138_c0_g2_i1.p1	putative high mobility group B protein 11 [Malus domestica]	MD12G1204900	1.932	8.97556e-12	2.803	1.02005e-23	putative high mobility group B protein 11 [Pyrus x bretschneideri, Malus domestica];uncharacterized protein LOC103962323 [Pyrus x bretschneideri];high mobility group B protein 15-like [Pyrus x bretschneideri]
TRINITY_DN730_c1_g1_i3.p1	hypothetical protein DVH24_017311 [Malus domestica]	TRINITY_DN27408_c0_g1_i1.p1	GDSL esterase/lipase At1g28580-like [Malus domestica]	MD10G1283400	2.073	4.81113e-32	2.797	8.67308e-59	uncharacterized protein LOC103944252 [Pyrus x bretschneideri];uncharacterized protein LOC103324878 [Prunus mume];hypothetical protein PRUPE_ppa019092mg [Prunus persica]
TRINITY_DN2710_c0_g1_i10.p1	3-ketoacyl-CoA synthase 19-like isoform X1 [Malus domestica]	TRINITY_DN13426_c0_g1_i1.p1	3-ketoacyl-CoA synthase 19-like isoform X1 [Malus domestica]	MD07G1187400	1.008	1.68131e-12	2.795	2.11531e-87	3-ketoacyl-CoA synthase 21-like [Pyrus x bretschneideri, Malus domestica];hypothetical protein PRUPE_ppa021980mg [Prunus persica];hypothetical protein PRUPE_ppa005454mg [Prunus persica]
TRINITY_DN63_c1_g1_i2.p1	hypothetical protein DVH24_000627 [Malus domestica]	TRINITY_DN7728_c0_g1_i2.p1	hypothetical protein DVH24_000627 [Malus domestica]	MD09G1162900	0.615	5.56133e-10	2.791	3.74676e-190	23 kDa jasmonate-induced protein-like [Pyrus x bretschneideri, Malus domestica];23 kDa jasmonate-induced protein-like isoform X1 [Malus domestica];23 kDa jasmonate-induced protein-like isoform X2 [Malus domestica]
TRINITY_DN6134_c0_g1_i1.p1	aquaporin-like [Malus domestica]	TRINITY_DN10698_c0_g1_i1.p1	aquaporin-like [Malus domestica]	MD10G1116500	1.723	4.50501e-26	2.789	8.24146e-68	aquaporin-like [Pyrus x bretschneideri, Prunus mume];hypothetical protein PRUPE_ppb013496mg [Prunus persica];probable aquaporin PIP1-4-like [Fragaria vesca subsp. vesca]
TRINITY_DN1190_c0_g1_i4.p1	hypothetical protein C1H46_020287 [Malus baccata]	TRINITY_DN772_c0_g1_i6.p1	hypothetical protein C1H46_020287 [Malus baccata]	MD14G1008400	2.705	8.76331e-65	2.777	1.13987e-67	dynamin-related protein 4C-like isoform X2 [Pyrus x bretschneideri];dynamin-related protein 4C-like [Pyrus x bretschneideri, Malus domestica];dynamin-related protein 4C-like isoform X1 [Pyrus x bretschneideri]
TRINITY_DN11987_c0_g1_i1.p1	IAA-amino acid hydrolase ILR1-like [Malus domestica]	TRINITY_DN16582_c0_g1_i1.p1	IAA-amino acid hydrolase ILR1-like [Malus domestica]	MD14G1033000	2.653	3.2168e-33	2.775	6.8599e-36	IAA-amino acid hydrolase ILR1-like [Pyrus x bretschneideri, Prunus mume, Fragaria vesca subsp. vesca];LOW QUALITY PROTEIN: IAA-amino acid hydrolase ILR1-like [Malus domestica];IAA-amino acid hydrolase [Morus notabilis]
TRINITY_DN4335_c0_g1_i11.p1	hypothetical protein C1H46_039559 [Malus baccata]	TRINITY_DN2537_c0_g1_i3.p1	hypothetical protein C1H46_039559 [Malus baccata]	MD17G1061000	1.508	2.53146e-23	2.767	7.92311e-76	phenolic glucoside malonyltransferase 2-like [Malus domestica];phenolic glucoside malonyltransferase 1-like [Pyrus x bretschneideri];phenolic glucoside malonyltransferase 2 [Prunus mume]
TRINITY_DN27225_c0_g1_i1.p1	protein trichome birefringence-like 43 [Malus domestica]	TRINITY_DN27223_c0_g1_i1.p1	protein trichome birefringence-like 43 [Malus domestica]	MD09G1233300	0.976	1.2495e-10	2.75	2.3725e-78	protein trichome birefringence-like 43 [Pyrus x bretschneideri, Prunus mume, Malus domestica];protein trichome birefringence-like 43 isoform X1 [Pyrus x bretschneideri, Malus domestica];protein trichome birefringence-like 43 isoform X2 [Malus domestica]
TRINITY_DN18001_c0_g1_i1.p1	cytochrome P450 78A9-like [Malus domestica]<>hypothetical protein DVH24_039983 [Malus domestica]	TRINITY_DN13854_c0_g1_i1.p1	cytochrome P450 78A9-like [Malus domestica]<>hypothetical protein DVH24_039983 [Malus domestica]	MD00G1204600	2.629	1.0902e-47	2.703	8.48292e-50	cytochrome P450 78A9-like [Pyrus x bretschneideri, Malus domestica];cytochrome P450 78A6-like [Pyrus x bretschneideri];hypothetical protein PRUPE_ppa003882mg [Prunus persica]
TRINITY_DN13040_c0_g1_i2.p1	uncharacterized protein LOC114822514 isoform X1 [Malus domestica]<>hypothetical protein DVH24_027726 [Malus domestica]	TRINITY_DN18808_c0_g1_i4.p1	uncharacterized protein LOC114822514 isoform X1 [Malus domestica]<>hypothetical protein DVH24_027726 [Malus domestica]	MD17G1154100	2.128	1.75564e-11	2.139	2.62761e-11	uncharacterized protein LOC103948619 [Pyrus x bretschneideri];uncharacterized protein LOC103443629 isoform X1 [Malus domestica];uncharacterized protein LOC103443629 isoform X2 [Malus domestica]
TRINITY_DN23132_c0_g1_i1.p1	hypothetical protein C1H46_025396 [Malus baccata]	TRINITY_DN16362_c0_g2_i1.p1	hypothetical protein C1H46_025396 [Malus baccata]	MD17G1235500	3.082	1.11429e-24	2.668	2.68005e-18	zinc finger CCCH domain-containing protein 2-like [Malus domestica];zinc finger CCCH domain-containing protein 2 [Malus domestica];hypothetical protein PRUPE_ppa015121mg [Prunus persica]
TRINITY_DN7302_c0_g1_i1.p1	endoglucanase CX-like isoform X1 [Malus domestica]	TRINITY_DN10578_c0_g1_i1.p1	endoglucanase CX-like isoform X1 [Malus domestica]	MD06G1120700	1.67	1.58545e-25	2.668	1.21038e-63	LOW QUALITY PROTEIN: endoglucanase CX-like [Malus domestica];endoglucanase CX-like [Pyrus x bretschneideri];hypothetical protein POPTR_0001s11430g [Populus trichocarpa]
TRINITY_DN6112_c0_g1_i12.p1	probable xyloglucan endotransglucosylase/hydrolase protein 32 precursor [Malus domestica]<>probable xyloglucan endotransglucosylase/hydrolase protein 32 isoform X1 [Malus domestica]<>probable xyloglucan endotransglucosylase/hydrolase protein 32 isoform X1 [Malus domestica]<>xyloglucan endotransglucosylase/hydrolase 9 [Malus domestica]	TRINITY_DN5634_c0_g1_i4.p1	probable xyloglucan endotransglucosylase/hydrolase protein 32 precursor [Malus domestica]<>probable xyloglucan endotransglucosylase/hydrolase protein 32 isoform X1 [Malus domestica]<>probable xyloglucan endotransglucosylase/hydrolase protein 32 isoform X1 [Malus domestica]<>xyloglucan endotransglucosylase/hydrolase 9 [Malus domestica]	MD12G1109400	1.777	5.454e-33	2.667	4.96854e-74	probable xyloglucan endotransglucosylase/hydrolase protein 32 precursor [Malus domestica];probable xyloglucan endotransglucosylase/hydrolase protein 32 [Pyrus x bretschneideri, Malus domestica];hypothetical protein PRUPE_ppa009437mg [Prunus persica]
TRINITY_DN12621_c0_g1_i11.p1	anthocyanidin reductase 1 [Malus hybrid cultivar]	TRINITY_DN2202_c0_g1_i10.p1	putative anthocyanidin reductase [Malus domestica]<>anthocyanidin reductase [Malus domestica]	MD05G1335600	2.225	1.24848e-85	2.658	1.01176e-121	anthocyanidin reductase [Malus domestica];anthocyanidin reductase-like [Pyrus x bretschneideri];hypothetical protein PRUPE_ppa008295mg [Prunus persica]
TRINITY_DN27293_c0_g1_i1.p1	hypothetical protein DVH24_010587 [Malus domestica]	TRINITY_DN28850_c0_g1_i1.p1	hypothetical protein DVH24_010587 [Malus domestica]	MD05G1195300	0.51	0.0453692	2.621	1.86462e-22	NAC domain-containing protein 21/22-like [Pyrus x bretschneideri];protein CUP-SHAPED COTYLEDON 3 [Malus domestica];hypothetical protein PRUPE_ppa009628mg [Prunus persica]
TRINITY_DN22247_c0_g1_i4.p1	hypothetical protein C1H46_024464 [Malus baccata]	TRINITY_DN21631_c0_g1_i1.p1	hypothetical protein C1H46_024464 [Malus baccata]	MD17G1092400	0.771	0.00783124	2.602	1.40867e-16	peroxidase 3-like [Pyrus x bretschneideri, Malus domestica];peroxidase 3 [Pyrus x bretschneideri];LOW QUALITY PROTEIN: peroxidase 3-like [Malus domestica]
TRINITY_DN21257_c0_g1_i1.p1	hypothetical protein C1H46_014043 [Malus baccata]	TRINITY_DN22802_c0_g1_i1.p1	hypothetical protein C1H46_014043 [Malus baccata]	MD03G1293400	0.87	0.00271046	2.572	2.62488e-16	uncharacterized protein LOC103408139 [Malus domestica];uncharacterized protein LOC103432620 [Malus domestica];uncharacterized protein LOC103427456 [Malus domestica]
TRINITY_DN12526_c0_g1_i20.p1	putative serine/threonine kinase [Malus domestica]	TRINITY_DN7143_c0_g1_i4.p1	hypothetical protein C1H46_033426 [Malus baccata]	MD12G1256400	3.82	4.03852e-50	2.562	4.93397e-22	receptor-like protein kinase FERONIA [Pyrus x bretschneideri, Malus domestica];receptor-like protein kinase ANXUR2 [Pyrus x bretschneideri, Malus domestica];Serine/threonine-protein kinase PBS1, putative [Ricinus communis]
TRINITY_DN18776_c0_g1_i1.p1	hypothetical protein C1H46_014770 [Malus baccata]	TRINITY_DN19517_c0_g1_i2.p1	hypothetical protein C1H46_014770 [Malus baccata]	MD02G1046300	2.672	3.08239e-29	2.531	7.28634e-26	polyol transporter 5-like [Pyrus x bretschneideri, Malus domestica, Fragaria vesca subsp. vesca];hypothetical protein PRUPE_ppa025908mg [Prunus persica];Polyol/monosaccharide transporter 5 isoform 1 [Theobroma cacao]
TRINITY_DN626_c2_g1_i1.p1	hypothetical protein C1H46_029137 [Malus baccata]	TRINITY_DN13549_c0_g1_i3.p1	hypothetical protein C1H46_029137 [Malus baccata]	MD16G1029900	0.902	3.40741e-11	2.531	9.64469e-87	heavy metal-associated isoprenylated plant protein 26-like isoform X2 [Malus domestica];heavy metal-associated isoprenylated plant protein 26-like isoform X1 [Malus domestica];heavy metal-associated isoprenylated plant protein 26-like [Malus domestica]
TRINITY_DN1023_c0_g1_i10.p1	(3S,6E)-nerolidol synthase 1-like [Malus domestica]	TRINITY_DN891_c2_g1_i5.p1	(3S,6E)-nerolidol synthase 1-like [Malus domestica]	MD05G1334800	1.616	7.94023e-93	2.51	1.51656e-229	(3S,6E)-nerolidol synthase 1-like [Pyrus x bretschneideri, Prunus mume, Malus domestica];hypothetical protein PRUPE_ppa003380mg [Prunus persica];(3S,6E)-nerolidol synthase 1-like isoform X1 [Pyrus x bretschneideri]
TRINITY_DN19264_c0_g1_i1.p1	hypothetical protein DVH24_036068 [Malus domestica]	TRINITY_DN13024_c1_g1_i2.p1	hypothetical protein DVH24_036068 [Malus domestica]	MD12G1158900	1.452	2.06938e-06	2.501	5.42914e-16	probable sugar phosphate/phosphate translocator At3g11320 [Pyrus x bretschneideri, Prunus mume, Malus domestica];hypothetical protein PRUPE_ppa018496mg [Prunus persica];probable sugar phosphate/phosphate translocator At3g11320-like [Fragaria vesca subsp. vesca]
TRINITY_DN17283_c0_g1_i1.p1	heavy metal-associated isoprenylated plant protein 9-like [Malus domestica]	TRINITY_DN17153_c0_g1_i6.p1	heavy metal-associated isoprenylated plant protein 9-like [Malus domestica]	MD01G1229700	1.829	7.149e-10	2.5	4.31895e-17	microtubule-associated protein 1B-like [Malus domestica];neurofilament medium polypeptide [Prunus mume];neurofilament medium polypeptide-like [Pyrus x bretschneideri]
TRINITY_DN538_c0_g1_i8.p1	GDSL esterase/lipase At3g48460 [Malus domestica]	TRINITY_DN66_c0_g1_i5.p1	GDSL esterase/lipase At3g48460 [Malus domestica]	MD06G1157800	1.388	4.5932e-49	2.498	2.29629e-159	GDSL esterase/lipase At3g48460-like [Pyrus x bretschneideri, Malus domestica];GDSL esterase/lipase At3g48460 [Pyrus x bretschneideri, Prunus mume, Malus domestica];hypothetical protein PRUPE_ppa006897mg [Prunus persica]
TRINITY_DN26148_c0_g1_i1.p1	hypothetical protein C1H46_017237 [Malus baccata]	TRINITY_DN26883_c0_g1_i3.p1	hypothetical protein C1H46_017237 [Malus baccata]	MD02G1036600	2.227	2.13826e-11	2.485	1.26616e-13	uncharacterized protein LOC103452276 [Malus domestica];uncharacterized protein LOC103406888 [Malus domestica];uncharacterized protein LOC103400534 [Malus domestica]
TRINITY_DN22708_c0_g1_i1.p1	hypothetical protein C1H46_005151 [Malus baccata]	TRINITY_DN62076_c0_g1_i1.p1	hypothetical protein C1H46_005151 [Malus baccata]	MD13G1121500	1.819	8.04488e-07	2.051	5.28035e-08	agamous-like MADS-box protein AGL9 homolog [Pyrus x bretschneideri, Prunus mume, Malus domestica];hypothetical protein PRUPE_ppa010679mg [Prunus persica];agamous-like MADS-box protein AGL9 homolog isoform X2 [Pyrus x bretschneideri]
TRINITY_DN10342_c0_g1_i4.p1	hypothetical protein DVH24_040906 [Malus domestica]	TRINITY_DN10166_c0_g1_i2.p1	hypothetical protein DVH24_040906 [Malus domestica]	MD13G1101200	3.251	2.50416e-43	2.453	3.31392e-24	non-functional NADPH-dependent codeinone reductase 2-like [Pyrus x bretschneideri, Malus domestica];hypothetical protein PRUPE_ppa008529mg [Prunus persica];hypothetical protein PRUPE_ppa008603mg [Prunus persica]
TRINITY_DN42441_c0_g1_i1.p1	hypothetical protein C1H46_039960 [Malus baccata]	TRINITY_DN21685_c0_g1_i6.p1	hypothetical protein C1H46_039960 [Malus baccata]	MD13G1191400	1.792	5.91211e-07	2.077	1.43628e-08	uncharacterized protein LOC103935975 [Pyrus x bretschneideri];uncharacterized protein C24B11.05-like [Malus domestica];uncharacterized protein LOC103956624 [Pyrus x bretschneideri]
TRINITY_DN10448_c0_g1_i1.p1	PREDICTED: high mobility group B protein 9 isoform X2 [Pyrus x bretschneideri]	TRINITY_DN12065_c0_g1_i21.p1	PREDICTED: high mobility group B protein 9 isoform X2 [Pyrus x bretschneideri]	MD15G1005800	2.007	4.66483e-41	2.418	2.24898e-59	high mobility group B protein 9-like isoform X2 [Malus domestica];high mobility group B protein 9-like isoform X1 [Malus domestica];high mobility group B protein 9-like isoform X3 [Malus domestica]
TRINITY_DN34433_c0_g1_i1.p1	short-chain dehydrogenase reductase 2a-like [Malus domestica]	TRINITY_DN20295_c0_g1_i2.p1	short-chain dehydrogenase reductase 2a-like [Malus domestica]	MD09G1003900	1.726	1.73363e-10	2.236	1.40093e-16	short-chain dehydrogenase reductase 2a-like [Malus domestica];secoisolariciresinol dehydrogenase-like isoform X2 [Pyrus x bretschneideri];secoisolariciresinol dehydrogenase-like isoform X1 [Pyrus x bretschneideri]
TRINITY_DN1207_c1_g1_i7.p2	hypothetical protein C1H46_031915 [Malus baccata]	TRINITY_DN4666_c0_g1_i8.p2	hypothetical protein C1H46_031915 [Malus baccata]	MD10G1062300	0.346	0.000830943	2.412	2.81225e-130	NADP-dependent D-sorbitol-6-phosphate dehydrogenase [Pyrus x bretschneideri, Malus domestica];NADP-dependent D-sorbitol-6-phosphate dehydrogenase-like [Pyrus x bretschneideri];hypothetical protein PRUPE_ppa009007mg [Prunus persica]
TRINITY_DN65975_c0_g1_i1.p1	transcription factor bHLH162-like [Malus domestica]	TRINITY_DN12692_c0_g1_i1.p1	transcription factor bHLH162-like [Malus domestica]	MD17G1238600	2.619	3.26323e-52	2.401	5.79758e-43	transcription factor bHLH36-like [Pyrus x bretschneideri, Prunus mume, Malus domestica];hypothetical protein PRUPE_ppa018357mg [Prunus persica];transcription factor bHLH118-like isoform X3 [Malus domestica]
TRINITY_DN16759_c0_g1_i2.p1	calcium-binding protein PBP1-like [Malus domestica]<>hypothetical protein DVH24_017099 [Malus domestica]<>hypothetical protein C1H46_040488 [Malus baccata]	TRINITY_DN24387_c0_g1_i1.p1	calcium-binding protein PBP1-like [Malus domestica]<>hypothetical protein DVH24_017099 [Malus domestica]<>hypothetical protein C1H46_040488 [Malus baccata]	MD10G1306100	1.342	2.83867e-06	2.38	1.67343e-16	calcium-binding protein PBP1-like [Citrus sinensis, Pyrus x bretschneideri, Prunus mume, Malus domestica];hypothetical protein PRUPE_ppa013577mg [Prunus persica];hypothetical protein L484_004889 [Morus notabilis]
TRINITY_DN4506_c0_g1_i8.p1	amidase 1-like isoform X1 [Malus domestica]	TRINITY_DN8798_c0_g1_i5.p1	amidase 1-like isoform X1 [Malus domestica]	MD12G1220900	2.568	5.07189e-33	2.378	6.74694e-28	amidase 1-like [Pyrus x bretschneideri];amidase 1-like isoform X3 [Pyrus x bretschneideri];amidase 1-like isoform X2 [Pyrus x bretschneideri]
TRINITY_DN15708_c0_g1_i8.p1	hypothetical protein C1H46_010252 [Malus baccata]	TRINITY_DN32156_c0_g1_i5.p1	cysteine-rich receptor-like protein kinase 26 [Malus domestica]	MD10G1312500	2.158	1.13113e-41	2.364	1.36051e-49	cysteine-rich receptor-like protein kinase 29 [Pyrus x bretschneideri];LOW QUALITY PROTEIN: putative receptor-like protein kinase At4g00960 [Prunus mume];putative receptor-like protein kinase At4g00960 isoform X1 [Prunus mume]
TRINITY_DN28618_c0_g1_i1.p1	protein SPIRAL1-like 5 [Malus domestica]<>hypothetical protein C1H46_019011 [Malus baccata]	TRINITY_DN36702_c0_g1_i1.p1	protein SPIRAL1-like 5 [Malus domestica]<>hypothetical protein C1H46_019011 [Malus baccata]	MD14G1110000	1.582	6.91454e-05	3.216	3.92261e-15	protein SPIRAL1-like 5 [Pyrus x bretschneideri, Malus domestica];Glycerol dehydrogenase large subunit, putative [Theobroma cacao];hypothetical protein PRUPE_ppa025762mg [Prunus persica]
TRINITY_DN18974_c0_g1_i3.p1	probable inactive 2-oxoglutarate-dependent dioxygenase AOP2 [Malus domestica]<>probable inactive 2-oxoglutarate-dependent dioxygenase AOP2 [Malus domestica]<>probable inactive 2-oxoglutarate-dependent dioxygenase AOP2 [Malus domestica]<>probable inactive 2-oxoglutarate-dependent dioxygenase AOP2 [Malus domestica]<>probable inactive 2-oxoglutarate-dependent dioxygenase AOP2 [Malus domestica]<>prob…	TRINITY_DN26188_c0_g1_i1.p1	probable inactive 2-oxoglutarate-dependent dioxygenase AOP2 [Malus domestica]<>probable inactive 2-oxoglutarate-dependent dioxygenase AOP2 [Malus domestica]<>probable inactive 2-oxoglutarate-dependent dioxygenase AOP2 [Malus domestica]<>probable inactive 2-oxoglutarate-dependent dioxygenase AOP2 [Malus domestica]<>probable inactive 2-oxoglutarate-dependent dioxygenase AOP2 [Malus domestica]<>prob…	MD09G1188300	2.044	8.66676e-28	2.358	1.53532e-36	probable inactive 2-oxoglutarate-dependent dioxygenase AOP2 [Pyrus x bretschneideri, Prunus mume, Malus domestica];2-oxoglutarate-dependent dioxygenase AOP3-like [Malus domestica];hypothetical protein PRUPE_ppa026475mg [Prunus persica]
TRINITY_DN3282_c0_g1_i1.p1	hypothetical protein C1H46_044622 [Malus baccata]	TRINITY_DN4951_c0_g1_i1.p1	hypothetical protein C1H46_044622 [Malus baccata]	MD05G1159700	2.648	5.37507e-68	2.356	5.74341e-53	putative lipid-transfer protein DIR1 [Pyrus x bretschneideri, Prunus mume, Malus domestica];hypothetical protein PRUPE_ppa018886mg [Prunus persica];Defective in induced resistance 1 protein [Theobroma cacao]
TRINITY_DN5159_c0_g1_i5.p1	LOW QUALITY PROTEIN: cysteine-rich receptor-like protein kinase 27 [Malus domestica]	TRINITY_DN15776_c0_g1_i12.p1	LOW QUALITY PROTEIN: cysteine-rich receptor-like protein kinase 27 [Malus domestica]	MD05G1336800	1.215	4.35599e-18	2.353	1.32288e-67	cysteine-rich receptor-like protein kinase 29 [Malus domestica];cysteine-rich receptor-like protein kinase 10 [Malus domestica];cysteine-rich receptor-like protein kinase 10 isoform X1 [Pyrus x bretschneideri]
TRINITY_DN25759_c0_g1_i1.p1	hypothetical protein C1H46_045379 [Malus baccata]	TRINITY_DN23701_c0_g1_i1.p1	hypothetical protein C1H46_045379 [Malus baccata]	MD07G1240000	1.512	2.63166e-05	2.547	1.03734e-11	uncharacterized protein At1g28695-like [Pyrus x bretschneideri, Prunus mume, Malus domestica];hypothetical protein PRUPE_ppa022545mg [Prunus persica];hypothetical protein PRUPE_ppa017327mg [Prunus persica]
TRINITY_DN21061_c0_g2_i1.p1	hypothetical protein C1H46_002843 [Malus baccata]	TRINITY_DN32277_c0_g1_i1.p1	hypothetical protein C1H46_002843 [Malus baccata]	MD09G1284800	2.306	2.18786e-15	2.338	1.67476e-15	UDP-glycosyltransferase 85A5-like [Prunus mume, Malus domestica];hypothetical protein PRUPE_ppa026557mg [Prunus persica];UDP-glucuronosyltransferase, putative [Ricinus communis]
TRINITY_DN25378_c0_g1_i1.p1	uncharacterized protein LOC103439733 isoform X1 [Malus domestica]<>hypothetical protein DVH24_024718 [Malus domestica]	TRINITY_DN21274_c0_g1_i2.p1	uncharacterized protein LOC103439733 isoform X1 [Malus domestica]<>hypothetical protein DVH24_024718 [Malus domestica]	MD07G1266700	2.611	1.37844e-10	2.322	2.17835e-08	uncharacterized protein LOC103439733 [Malus domestica];uncharacterized protein LOC103960546 isoform X1 [Pyrus x bretschneideri];uncharacterized protein LOC103960546 isoform X2 [Pyrus x bretschneideri]
TRINITY_DN55953_c0_g1_i1.p1	hypothetical protein C1H46_023095 [Malus baccata]	TRINITY_DN11639_c0_g1_i2.p1	hypothetical protein C1H46_023095 [Malus baccata]	MD15G1353800	2.138	8.16724e-58	2.32	9.2599e-68	flavonol synthase/flavanone 3-hydroxylase-like [Prunus mume];hypothetical protein PRUPE_ppa008455mg [Prunus persica];hypothetical protein PRUPE_ppa008446mg [Prunus persica]
TRINITY_DN15195_c0_g1_i1.p1	hypothetical protein C1H46_034457 [Malus baccata]	TRINITY_DN37157_c0_g1_i1.p1	hypothetical protein C1H46_034457 [Malus baccata]	MD15G1063100	1.452	1.22922e-18	2.32	3.16959e-48	branched-chain-amino-acid aminotransferase 2, chloroplastic-like [Pyrus x bretschneideri, Malus domestica];branched-chain-amino-acid aminotransferase 2, chloroplastic-like isoform X1 [Prunus mume];branched-chain-amino-acid aminotransferase 2, chloroplastic-like isoform X2 [Prunus mume]
TRINITY_DN24385_c0_g1_i3.p1	PREDICTED: tropinone reductase homolog [Pyrus x bretschneideri]	TRINITY_DN21579_c0_g1_i1.p1	PREDICTED: tropinone reductase homolog [Pyrus x bretschneideri]	MD12G1149000	1.443	0.00362838	2.412	3.16324e-05	tropinone reductase homolog [Pyrus x bretschneideri, Malus domestica];tropinone reductase 1-like [Malus domestica];tropinone reductase homolog isoform X1 [Pyrus x bretschneideri]
TRINITY_DN46588_c0_g1_i1.p1	geranyl diphosphate phosphohydrolase-like [Malus domestica]	TRINITY_DN60415_c0_g1_i1.p1	geranyl diphosphate phosphohydrolase-like [Malus domestica]	MD13G1048900	1.419	0.00269262	2.97	6.43336e-08	nudix hydrolase 1-like [Pyrus x bretschneideri, Prunus mume, Malus domestica, Fragaria vesca subsp. vesca];hypothetical protein PRUPE_ppa023733mg [Prunus persica];hypothetical protein PRUPE_ppa023867mg [Prunus persica]
TRINITY_DN12483_c0_g1_i3.p1	hypothetical protein C1H46_016403 [Malus baccata]	TRINITY_DN13883_c0_g1_i1.p1	uncharacterized protein LOC103450342 isoform X1 [Malus domestica]	MD15G1006500	0.591	9.68705e-05	2.305	2.50115e-53	hippocampus abundant transcript 1 protein-like [Malus domestica];uncharacterized protein LOC103927348 [Pyrus x bretschneideri];hypothetical protein PRUPE_ppa005755mg [Prunus persica]
TRINITY_DN286_c0_g1_i3.p1	hypothetical protein C1H46_002995 [Malus baccata]	TRINITY_DN254_c0_g1_i2.p1	uncharacterized protein LOC103453370 [Malus domestica]<>hypothetical protein DVH24_005646 [Malus domestica]	MD11G1167600	1.765	3.84735e-81	2.301	8.68686e-138	uncharacterized protein LOC103453370 [Malus domestica];uncharacterized protein LOC103405117 [Malus domestica];uncharacterized protein LOC103966390 [Pyrus x bretschneideri]
TRINITY_DN8921_c0_g1_i3.p1	uncharacterized protein LOC103401977 isoform X1 [Malus domestica]<>uncharacterized protein LOC103401977 isoform X1 [Malus domestica]	TRINITY_DN18838_c0_g1_i3.p1	uncharacterized protein LOC103401977 isoform X1 [Malus domestica]<>uncharacterized protein LOC103401977 isoform X1 [Malus domestica]	MD15G1382700	1.93	5.56467e-35	2.273	2.8297e-48	uncharacterized protein LOC103401977 [Malus domestica];uncharacterized protein LOC103416228 [Malus domestica];uncharacterized protein LOC103945520 isoform X1 [Pyrus x bretschneideri]
TRINITY_DN2406_c0_g1_i1.p1	hypothetical protein C1H46_039681 [Malus baccata]	TRINITY_DN7592_c0_g1_i3.p1	hypothetical protein C1H46_039681 [Malus baccata]	MD05G1349700	0.754	6.39064e-09	2.258	1.15292e-68	aspartic proteinase [Malus domestica];aspartic proteinase-like [Pyrus x bretschneideri, Malus domestica];hypothetical protein PRUPE_ppa003924mg [Prunus persica]
TRINITY_DN9127_c2_g1_i1.p1	hypothetical protein DVH24_012187 [Malus domestica]	TRINITY_DN3522_c1_g1_i1.p1	hypothetical protein DVH24_012187 [Malus domestica]	MD15G1116900	2.064	1.83621e-34	2.253	1.33353e-40	2-oxoglutarate-dependent dioxygenase AOP2-like [Malus domestica];2-oxoglutarate-dependent dioxygenase AOP3-like [Pyrus x bretschneideri, Malus domestica];hypothetical protein PRUPE_ppa024900mg [Prunus persica]
TRINITY_DN7965_c0_g1_i1.p1	serine carboxypeptidase-like 34 isoform X1 [Malus domestica]	TRINITY_DN15864_c1_g1_i1.p1	serine carboxypeptidase-like 34 isoform X1 [Malus domestica]	MD13G1004200	1.5	9.09153e-24	2.252	2.28211e-53	serine carboxypeptidase-like 34 [Pyrus x bretschneideri, Prunus mume, Malus domestica];hypothetical protein PRUPE_ppa005368mg [Prunus persica];serine carboxypeptidase-like 34-like [Fragaria vesca subsp. vesca]
TRINITY_DN11897_c0_g1_i4.p1	hypothetical protein C1H46_038022 [Malus baccata]	TRINITY_DN13794_c0_g2_i1.p1	hypothetical protein C1H46_038022 [Malus baccata]	MD04G1211400	2.308	1.79866e-43	2.249	1.86408e-40	protein transport protein SEC23-like [Pyrus x bretschneideri, Malus domestica];protein transport protein SEC23-like isoform X2 [Pyrus x bretschneideri];protein transport protein SEC23-like isoform X1 [Pyrus x bretschneideri]
TRINITY_DN29281_c0_g1_i1.p1	hypothetical protein C1H46_031271 [Malus baccata]	TRINITY_DN31050_c0_g1_i1.p1	hypothetical protein C1H46_031271 [Malus baccata]	MD16G1096400	1.301	5.50084e-05	2.96	2.73426e-19	F-box/kelch-repeat protein At1g23390-like [Malus domestica];F-box/kelch-repeat protein At1g23390 [Malus domestica];LOW QUALITY PROTEIN: F-box/kelch-repeat protein At1g23390 [Pyrus x bretschneideri]
TRINITY_DN29647_c0_g1_i1.p1	pathogen-related protein-like [Malus domestica]<>hypothetical protein DVH24_030575 [Malus domestica]	TRINITY_DN21181_c0_g1_i2.p1	hypothetical protein C1H46_045607 [Malus baccata]	MD05G1017400	2.137	1.62794e-10	2.241	3.77852e-11	pathogen-related protein-like [Nelumbo nucifera, Pyrus x bretschneideri, Prunus mume, Malus domestica];hypothetical protein PRUPE_ppa010729mg [Prunus persica];hypothetical protein L484_003537 [Morus notabilis]
TRINITY_DN10330_c0_g1_i1.p1	PREDICTED: acylsugar acyltransferase 3-like [Pyrus x bretschneideri]	TRINITY_DN15417_c0_g1_i1.p1	PREDICTED: acylsugar acyltransferase 3-like [Pyrus x bretschneideri]	MD14G1155800	2.106	1.00753e-32	2.239	1.70557e-36	salutaridinol 7-O-acetyltransferase-like [Pyrus x bretschneideri, Fragaria vesca subsp. vesca];deacetylvindoline O-acetyltransferase-like [Pyrus x bretschneideri, Prunus mume];Deacetylvindoline O-acetyltransferase [Morus notabilis]
TRINITY_DN78239_c0_g1_i1.p1	hypothetical protein DVH24_042629 [Malus domestica]<>hypothetical protein C1H46_004756 [Malus baccata]	TRINITY_DN49903_c0_g1_i1.p1	hypothetical protein DVH24_042629 [Malus domestica]<>hypothetical protein C1H46_004756 [Malus baccata]	MD08G1176900	1.254	0.023838	2.589	0.0006913	heavy metal-associated isoprenylated plant protein 26-like [Pyrus x bretschneideri, Malus domestica];heavy metal-associated isoprenylated plant protein 26 [Malus domestica];hypothetical protein PRUPE_ppa012855mg [Prunus persica]
TRINITY_DN7234_c0_g1_i1.p1	GDSL esterase/lipase At5g45950 [Malus domestica]	TRINITY_DN11437_c0_g1_i1.p1	GDSL esterase/lipase At5g45950 [Malus domestica]	MD10G1286100	2.225	9.46617e-105	2.232	2.97829e-104	GDSL esterase/lipase At5g45950-like [Malus domestica];GDSL esterase/lipase At5g45950 [Pyrus x bretschneideri, Prunus mume];hypothetical protein PRUPE_ppa007642mg [Prunus persica]
TRINITY_DN45447_c0_g1_i2.p1	hypothetical protein C1H46_006568 [Malus baccata]	TRINITY_DN68296_c0_g1_i1.p1	hypothetical protein C1H46_006568 [Malus baccata]	MD09G1215700	4.765	9.79372e-60	2.228	7.02541e-13	palmitoyl-acyl carrier protein thioesterase, chloroplastic-like [Prunus mume, Malus domestica];uncharacterized protein LOC103328008 [Prunus mume];hypothetical protein PRUPE_ppa016174mg [Prunus persica]
TRINITY_DN47124_c0_g1_i1.p1	hypothetical protein DVH24_009739 [Malus domestica]	TRINITY_DN60860_c0_g1_i1.p1	PREDICTED: methanol O-anthraniloyltransferase-like [Pyrus x bretschneideri]<>methanol O-anthraniloyltransferase-like [Pyrus ussuriensis x Pyrus communis]	MD06G1017700	3.384	1.486e-131	2.224	6.67404e-54	methanol O-anthraniloyltransferase-like [Pyrus x bretschneideri, Prunus mume, Malus domestica];hypothetical protein PRUPE_ppa005625mg [Prunus persica];hypothetical protein PRUPE_ppa025565mg [Prunus persica]
TRINITY_DN9253_c0_g1_i8.p1	hypothetical protein C1H46_009965 [Malus baccata]	TRINITY_DN8972_c0_g1_i16.p1	hypothetical protein C1H46_009965 [Malus baccata]	MD17G1187400	2.146	2.7973e-71	2.224	5.54982e-76	putative pentatricopeptide repeat-containing protein At1g17630 [Pyrus x bretschneideri, Prunus mume, Malus domestica];hypothetical protein PRUPE_ppa001759mg [Prunus persica];hypothetical protein L484_005106 [Morus notabilis]
TRINITY_DN9729_c0_g1_i1.p1	PREDICTED: triosephosphate isomerase, cytosolic [Pyrus x bretschneideri]<>triosephosphate isomerase [Pyrus ussuriensis x Pyrus communis]	TRINITY_DN11977_c0_g1_i1.p1	PREDICTED: triosephosphate isomerase, cytosolic [Pyrus x bretschneideri]<>triosephosphate isomerase [Pyrus ussuriensis x Pyrus communis]	MD00G1012200	2.328	5.57769e-73	2.202	4.55187e-64	triosephosphate isomerase, cytosolic [Pyrus x bretschneideri, Prunus mume];hypothetical protein PRUPE_ppa010312mg [Prunus persica];triosephosphate isomerase, cytosolic isoform X1 [Vitis vinifera]
TRINITY_DN47045_c0_g1_i1.p1	hypothetical protein C1H46_016864 [Malus baccata]	TRINITY_DN44907_c0_g1_i1.p1	hypothetical protein C1H46_016864 [Malus baccata]	MD01G1091400	1.37	1.04606e-08	2.199	2.20117e-20	soluble inorganic pyrophosphatase-like [Pyrus x bretschneideri, Malus domestica];soluble inorganic pyrophosphatase [Prunus mume, Malus domestica];hypothetical protein PRUPE_ppa011444mg [Prunus persica]
TRINITY_DN11292_c0_g1_i1.p1	cationic peroxidase 1-like [Malus domestica]	TRINITY_DN15743_c0_g1_i1.p1	cationic peroxidase 1-like [Malus domestica]	MD12G1184600	3.254	3.06537e-65	2.196	1.86911e-29	cationic peroxidase 1-like [Pyrus x bretschneideri, Prunus mume, Malus domestica];cationic peroxidase 1-like isoform X1 [Pyrus x bretschneideri];hypothetical protein PRUPE_ppa008642mg [Prunus persica]
TRINITY_DN5641_c0_g1_i1.p1	protein ECERIFERUM 2-like isoform X2 [Malus domestica]<>hypothetical protein DVH24_016688 [Malus domestica]	TRINITY_DN8353_c0_g1_i1.p1	protein ECERIFERUM 2-like isoform X2 [Malus domestica]<>hypothetical protein DVH24_016688 [Malus domestica]	MD15G1386300	0.653	4.61059e-07	2.189	3.60008e-69	protein ECERIFERUM 1-like isoform X2 [Malus domestica];protein ECERIFERUM 1-like isoform X1 [Malus domestica];hypothetical protein PRUPE_ppa006117mg [Prunus persica]
TRINITY_DN14270_c0_g1_i1.p1	hypothetical protein C1H46_035096 [Malus baccata]	TRINITY_DN8244_c0_g1_i2.p1	PREDICTED: protein LIGHT-DEPENDENT SHORT HYPOCOTYLS 4-like [Pyrus x bretschneideri]	MD10G1183100	3.258	1.823e-45	2.188	4.75324e-20	protein LIGHT-DEPENDENT SHORT HYPOCOTYLS 4-like [Pyrus x bretschneideri, Prunus mume, Malus domestica];LOW QUALITY PROTEIN: protein LIGHT-DEPENDENT SHORT HYPOCOTYLS 4-like [Malus domestica];uncharacterized protein LOC101301170 [Fragaria vesca subsp. vesca]
TRINITY_DN26035_c0_g1_i1.p1	hypothetical protein DVH24_008760 [Malus domestica]	TRINITY_DN46886_c0_g1_i1.p1	hypothetical protein DVH24_008760 [Malus domestica]	MD06G1179400	0.996	0.0224115	3.651	3.36679e-10	uncharacterized protein LOC103455284 [Malus domestica];uncharacterized protein LOC103438145 [Malus domestica];uncharacterized protein LOC103420773 [Malus domestica]
TRINITY_DN30933_c0_g1_i1.p1	disease resistance RPP13-like protein 4 [Malus domestica]	TRINITY_DN23891_c0_g1_i2.p1	disease resistance RPP13-like protein 4 [Malus domestica]	MD10G1305300	2.843	4.41973e-48	2.186	1.67635e-27	disease resistance RPP13-like protein 4 [Prunus mume, Malus domestica];hypothetical protein PRUPE_ppa016037mg [Prunus persica];hypothetical protein POPTR_0011s04040g [Populus trichocarpa]
TRINITY_DN8255_c0_g2_i1.p1	PREDICTED: heterogeneous nuclear ribonucleoprotein R-like isoform X1 [Pyrus x bretschneideri]<>PREDICTED: heterogeneous nuclear ribonucleoprotein R-like isoform X1 [Pyrus x bretschneideri]<>PREDICTED: heterogeneous nuclear ribonucleoprotein R-like isoform X1 [Pyrus x bretschneideri]<>heterogeneous nuclear ribonucleoprotein R-like [Pyrus ussuriensis x Pyrus communis]	TRINITY_DN12792_c0_g1_i3.p1	PREDICTED: heterogeneous nuclear ribonucleoprotein R-like isoform X1 [Pyrus x bretschneideri]<>PREDICTED: heterogeneous nuclear ribonucleoprotein R-like isoform X1 [Pyrus x bretschneideri]<>PREDICTED: heterogeneous nuclear ribonucleoprotein R-like isoform X1 [Pyrus x bretschneideri]<>heterogeneous nuclear ribonucleoprotein R-like [Pyrus ussuriensis x Pyrus communis]	MD11G1164700	2.407	1.80845e-76	2.178	1.11968e-61	heterogeneous nuclear ribonucleoprotein R-like isoform X1 [Pyrus x bretschneideri];heterogeneous nuclear ribonucleoprotein Q-like isoform X2 [Pyrus x bretschneideri];heterogeneous nuclear ribonucleoprotein R-like [Prunus mume]
TRINITY_DN1350_c1_g1_i1.p1	hypothetical protein C1H46_010019 [Malus baccata]	TRINITY_DN2278_c1_g1_i7.p1	hypothetical protein C1H46_010019 [Malus baccata]	MD02G1292200	0.687	1.38564e-06	2.175	7.88338e-51	proline-rich protein 4-like [Pyrus x bretschneideri, Prunus mume, Malus domestica];proline-rich protein 4-like isoform X2 [Pyrus x bretschneideri];uncharacterized protein LOC101315276 [Fragaria vesca subsp. vesca]
TRINITY_DN13502_c0_g1_i7.p1	hypothetical protein C1H46_016620 [Malus baccata]	TRINITY_DN17966_c0_g1_i3.p1	hypothetical protein C1H46_016620 [Malus baccata]	MD15G1034400	1.644	2.12912e-16	2.174	8.30432e-28	ent-kaurene oxidase, chloroplastic-like [Pyrus x bretschneideri, Malus domestica];ent-kaurene oxidase, chloroplastic-like isoform X1 [Pyrus x bretschneideri];ent-kaurene oxidase, chloroplastic-like isoform X2 [Pyrus x bretschneideri]
TRINITY_DN7167_c0_g1_i11.p1	hypothetical protein C1H46_009438 [Malus baccata]	TRINITY_DN8469_c0_g1_i1.p1	hypothetical protein C1H46_009438 [Malus baccata]	MD03G1234300	2.388	7.06332e-65	2.169	4.71609e-52	L-type lectin-domain containing receptor kinase IX.1-like [Pyrus x bretschneideri, Prunus mume, Malus domestica];hypothetical protein PRUPE_ppa021403mg [Prunus persica];hypothetical protein PRUPE_ppa022345mg [Prunus persica]
TRINITY_DN20100_c0_g1_i7.p1	protein LONG AFTER FAR-RED 3 isoform X1 [Malus domestica]	TRINITY_DN9288_c0_g1_i3.p1	protein LONG AFTER FAR-RED 3 isoform X1 [Malus domestica]	MD07G1040200	2.755	4.81043e-60	2.159	9.38075e-36	uncharacterized protein LOC103438564 isoform X1 [Malus domestica];uncharacterized protein LOC103438564 isoform X2 [Malus domestica];uncharacterized protein LOC103952132 isoform X2 [Pyrus x bretschneideri]
TRINITY_DN13174_c0_g1_i7.p1	nudix hydrolase 2-like [Malus domestica]	TRINITY_DN39134_c0_g1_i1.p1	nudix hydrolase 2-like [Malus domestica]	MD09G1127900	0.883	0.0103855	2.106	3.13221e-07	nudix hydrolase 2-like [Pyrus x bretschneideri];nudix hydrolase 2 isoform X1 [Prunus mume];hypothetical protein PRUPE_ppa007741mg [Prunus persica]
TRINITY_DN24441_c0_g1_i1.p1	uncharacterized protein LOC108169406 [Malus domestica]<>hypothetical protein DVH24_022829 [Malus domestica]	TRINITY_DN25301_c0_g1_i1.p1	uncharacterized protein LOC108169406 [Malus domestica]<>hypothetical protein DVH24_022829 [Malus domestica]	MD01G1169200	0.869	0.0156098	2.062	2.64999e-06	uncharacterized protein LOC103423514 [Malus domestica];uncharacterized protein LOC103952816 [Pyrus x bretschneideri];uncharacterized protein LOC103432976 [Malus domestica]
TRINITY_DN5778_c0_g1_i4.p1	hypothetical protein DVH24_020792 [Malus domestica]	TRINITY_DN16000_c0_g1_i7.p1	hypothetical protein DVH24_020792 [Malus domestica]	MD08G1107600	1.542	1.32137e-55	2.144	1.54614e-109	putative wall-associated receptor kinase-like 16 [Pyrus x bretschneideri, Prunus mume, Malus domestica];uncharacterized protein LOC101296545 [Fragaria vesca subsp. vesca];Wall-associated kinase 2, putative [Theobroma cacao]
TRINITY_DN17832_c0_g1_i1.p1	PREDICTED: shikimate O-hydroxycinnamoyltransferase-like [Pyrus x bretschneideri]	TRINITY_DN28237_c0_g1_i1.p1	PREDICTED: shikimate O-hydroxycinnamoyltransferase-like [Pyrus x bretschneideri]	MD17G1224900	1.158	1.94248e-08	2.13	7.44018e-26	shikimate O-hydroxycinnamoyltransferase-like [Pyrus x bretschneideri, Malus domestica];hypothetical protein PRUPE_ppa005872mg [Prunus persica];hypothetical protein PRUPE_ppa005873mg [Prunus persica]
TRINITY_DN15062_c0_g1_i1.p1	hypothetical protein D8674_015945 [Pyrus ussuriensis x Pyrus communis]	TRINITY_DN26491_c0_g1_i1.p1	hypothetical protein C1H46_021979 [Malus baccata]	MD13G1041700	1.138	2.75094e-06	2.111	1.3236e-17	uncharacterized protein LOC103947187 [Pyrus x bretschneideri];uncharacterized protein LOC103423853 [Malus domestica];uncharacterized protein LOC103414411 [Malus domestica]
TRINITY_DN39424_c0_g1_i2.p1	hypothetical protein C1H46_036342 [Malus baccata]	TRINITY_DN61334_c0_g1_i1.p1	hypothetical protein DVH24_003317 [Malus domestica]	MD11G1212200	1.03	0.00686997	2.083	3.15128e-06	uncharacterized protein LOC103448378 [Malus domestica];uncharacterized protein LOC103940902 [Pyrus x bretschneideri];uncharacterized protein LOC103428295 [Malus domestica]
TRINITY_DN27061_c0_g1_i1.p1	#N/A	TRINITY_DN32493_c0_g1_i1.p2	#N/A	MD14G1217700	0.65	0.0495344	2.147	2.69023e-07	uncharacterized protein LOC103455457 [Malus domestica];uncharacterized protein LOC103431206 [Malus domestica];uncharacterized protein LOC103455459 [Malus domestica]
TRINITY_DN9626_c0_g1_i2.p1	uncharacterized protein LOC103429378 [Malus domestica]<>hypothetical protein DVH24_021724 [Malus domestica]	TRINITY_DN12483_c0_g1_i2.p1	uncharacterized protein LOC103429378 [Malus domestica]<>hypothetical protein DVH24_021724 [Malus domestica]	MD05G1090800	0.75	3.29416e-06	2.081	2.60406e-40	proline-rich receptor-like protein kinase PERK14 [Pyrus x bretschneideri];uncharacterized protein LOC103429378 [Malus domestica];uncharacterized protein LOC103960644 [Pyrus x bretschneideri]
TRINITY_DN13438_c0_g1_i1.p1	GDSL esterase/lipase At4g16230-like isoform X1 [Malus domestica]	TRINITY_DN8629_c0_g1_i1.p1	GDSL esterase/lipase At4g16230-like isoform X1 [Malus domestica]	MD13G1152500	3.792	1.09454e-119	2.057	3.14107e-34	GDSL esterase/lipase At4g16230-like [Prunus mume];hypothetical protein PRUPE_ppa019377mg [Prunus persica];hypothetical protein PRUPE_ppb015065mg [Prunus persica]
TRINITY_DN13818_c0_g1_i3.p2	crocetin glucosyltransferase, chloroplastic-like [Malus domestica]	TRINITY_DN36934_c0_g1_i1.p1	crocetin glucosyltransferase, chloroplastic-like [Malus domestica]	MD15G1410400	0.524	0.0238811	2.041	2.94891e-17	UDP-glycosyltransferase 75C1-like [Malus domestica];crocetin glucosyltransferase, chloroplastic-like isoform X2 [Pyrus x bretschneideri];crocetin glucosyltransferase, chloroplastic-like isoform X1 [Pyrus x bretschneideri]
TRINITY_DN19240_c0_g1_i1.p1	hypothetical protein DVH24_024956 [Malus domestica]	TRINITY_DN26145_c0_g1_i1.p1	hypothetical protein DVH24_024956 [Malus domestica]	MD07G1295700	0.935	6.3041e-10	2.038	8.36176e-44	U-box domain-containing protein 43-like [Pyrus x bretschneideri, Prunus mume, Malus domestica, Fragaria vesca subsp. vesca];hypothetical protein PRUPE_ppa018910mg [Prunus persica];U-box domain-containing protein 43 [Morus notabilis]
TRINITY_DN5883_c0_g1_i6.p1	beta-amyrin 28-monooxygenase-like isoform X2 [Malus domestica]	TRINITY_DN10125_c0_g1_i13.p1	beta-amyrin 28-monooxygenase-like isoform X2 [Malus domestica]	MD10G1240600	0.967	1.30474e-10	2.023	1.49926e-42	beta-amyrin 28-oxidase-like isoform X2 [Malus domestica];beta-amyrin 28-oxidase-like isoform X1 [Malus domestica];beta-amyrin 28-oxidase-like [Malus domestica]
TRINITY_DN15142_c0_g1_i7.p1	cytokinin dehydrogenase 5-like [Malus domestica]<>hypothetical protein DVH24_012939 [Malus domestica]	TRINITY_DN17839_c0_g1_i1.p1	cytokinin dehydrogenase 5-like [Malus domestica]<>hypothetical protein DVH24_012939 [Malus domestica]	MD15G1021500	1.811	1.53908e-27	2.021	8.26132e-34	cytokinin dehydrogenase 5-like [Malus domestica];cytokinin dehydrogenase 5 [Pyrus x bretschneideri];hypothetical protein PRUPE_ppa003895mg [Prunus persica]
TRINITY_DN959_c0_g1_i1.p1	hypothetical protein C1H46_006290 [Malus baccata]	TRINITY_DN6857_c0_g1_i5.p1	hypothetical protein C1H46_006290 [Malus baccata]	MD15G1249600	-0.464	0.000877811	2.003	9.99688e-48	LOW QUALITY PROTEIN: cytochrome P450 84A1-like [Malus domestica];cytochrome P450 84A1-like [Pyrus x bretschneideri, Malus domestica];hypothetical protein PRUPE_ppa004260mg [Prunus persica]
TRINITY_DN11019_c0_g1_i1.p1	hypothetical protein C1H46_010069 [Malus baccata]	TRINITY_DN14598_c0_g1_i1.p1	hypothetical protein C1H46_010069 [Malus baccata]	MD12G1013500	1.01	5.07456e-07	2.002	7.25278e-23	uncharacterized protein LOC103413453 [Malus domestica];uncharacterized protein LOC103449363 [Malus domestica];uncharacterized protein LOC103939886 [Pyrus x bretschneideri]
