# Supplementary material for: De novo transcriptome assembly and functional analysis reveal a dihydrochalcone 3-hydroxylase(DHC3H) of wild Malus species that produces sieboldin in vivo
Source: Front Plant Sci. 2022 Dec 16;13:1072765. doi: 10.3389/fpls.2022.1072765 (PMC9800874; doi:10.3389/fpls.2022.1072765)
Supplement: Supplementary file 14 [file Table_7.xlsx]

## Sheet: Sheet1
Supplementary Table 7. Results of HRM marker analysis.
Sample Nr	Accession ID	Cluster	Confidence (%)
25	M. toringo (PI 590051)	Cluster 1	99.3
26	M. toringo (PI 589958)	Cluster 1	98.8
31	M. micromalus (PI 594092)	Cluster 1	99.7
37	M. sargentii (PI 590049)	Cluster 1	98.8
40	M. prunifolia (PI 594102)	Cluster 3	99.6
42	M. toringo (PI 594094)	Cluster 1	99.5
82	M. baccata (B1 Floribunda)	Cluster 3	99.5
89	M. prunifolia (B1 A79)	Cluster 2	97.9
108	M. adstringens	Cluster 2	98.2
117	M. sargentii (PI 588919)	Cluster 1	96
120	M. sargentii (PI 588761)	Cluster 1	99.5
121	M. mandshurica (PI 588753)	Cluster 2	98.4
122	M. mandshurica (PI 588754)	Cluster 2	90.1
124	M. hartwigii (PI 589420)	Cluster 2	98.2
132	M. floribunda (PI 589827)	Cluster 1	99.7
136	M. toringo (PI 589749)	Cluster 1	99.1
144	M. x paradisiaca	Cluster 3	99.9
167	M. toringo (PI 589957)	Cluster 1	99.4
168	M. sargentii (PI 589400)	Cluster 1	98.8
169	M. x hartwigii (PI 589867)	Cluster 2	98.3
173	M. x hartwigii (PI 589868)	Cluster 1	99.1
176	M. spectabilis (PI 588921)	Cluster 3	99.4
182	M. halliana (PI 589013)	Cluster 2	98.3
186	M. x adstringens (PI 588898)	Cluster 2	98
187	M. sargentii (PI 589372)	Cluster 1	99.3
188	M. x robusta (PI 588904)	Cluster 2	97.5
195	M. tschonoskii (PI 589752)	Cluster 3	99.1
196	M. x moerlandsii (PI 589449)	Cluster 2	96.8
202	M. x moerlandsii (PI 437056)	Cluster 2	92.5
207	M. x scheideckeri (PI 589418)	Cluster 2	84.4
222	M. x robusta (PI 215542)	Cluster 2	98.6
231	M. toringo (PI 613858)	Cluster 1	99.3
249	M. x purpurea (PI 588911)	Cluster 3	99
258	M. x atrosanguinea (PI 590221)	Cluster 1	99.7
279	M. floribunda (PI 483266)	Cluster 1	99.3
281	M. micromalus (PI 594096)	Cluster 1	99.8
300	M. evereste (Hybrid)	Cluster 1	99.5
301	M. domestica cv. 'Golden Delicious'	Cluster 3	99.9
